# Supplementary material for: Integrated Transcriptome and Metabolome Analysis Revealed the Causal Agent of Primary Bud Necrosis in ‘Summer Black’ Grape
Source: MDPI journal article supplement (doi:10.3390/ijms241210410), 2023-06-20
Supplement: s1 [file s1]

# **Integrated Transcriptome and Metabolome Analysis Revealed Primary bud Necrosis in ‘Summer Black’ Grape**

Shaogang Fan, Yanshuai Xu, Miao Bai, Feixiong Luo, Jun Yu, Guoshun Yang\*  
College of Horticulture, Hunan Agricultural University, Changsha, Hunan 410128, PR  
China

## **Supplementary Figures List**

**Supplementary Figures S1.** Principal component analysis of transcriptome data.

**Supplementary Figure S2.** The DEGs gene ontology functional classification

**Supplementary Figure S3.** Go enrich analysis of DEGs

**Supplementary Figure S4.** Categories of common DAMs in the comparison of BN  
vs. PN and BN vs. AN

**Supplementary Figure S5.** Clustering analysis of DAMs in the comparison of BN vs.  
PN and BN vs. AN.

**Supplementary Figure S6.** Co-enrichment analysis of DEMs and DEGs in KEGG  
pathways

**Supplementary Figure S7.** The Co-enriched KEGG pathways of correlation analysis  
of differentially accumulated metabolites and differentially expressed genes.

## Supplementary Figures

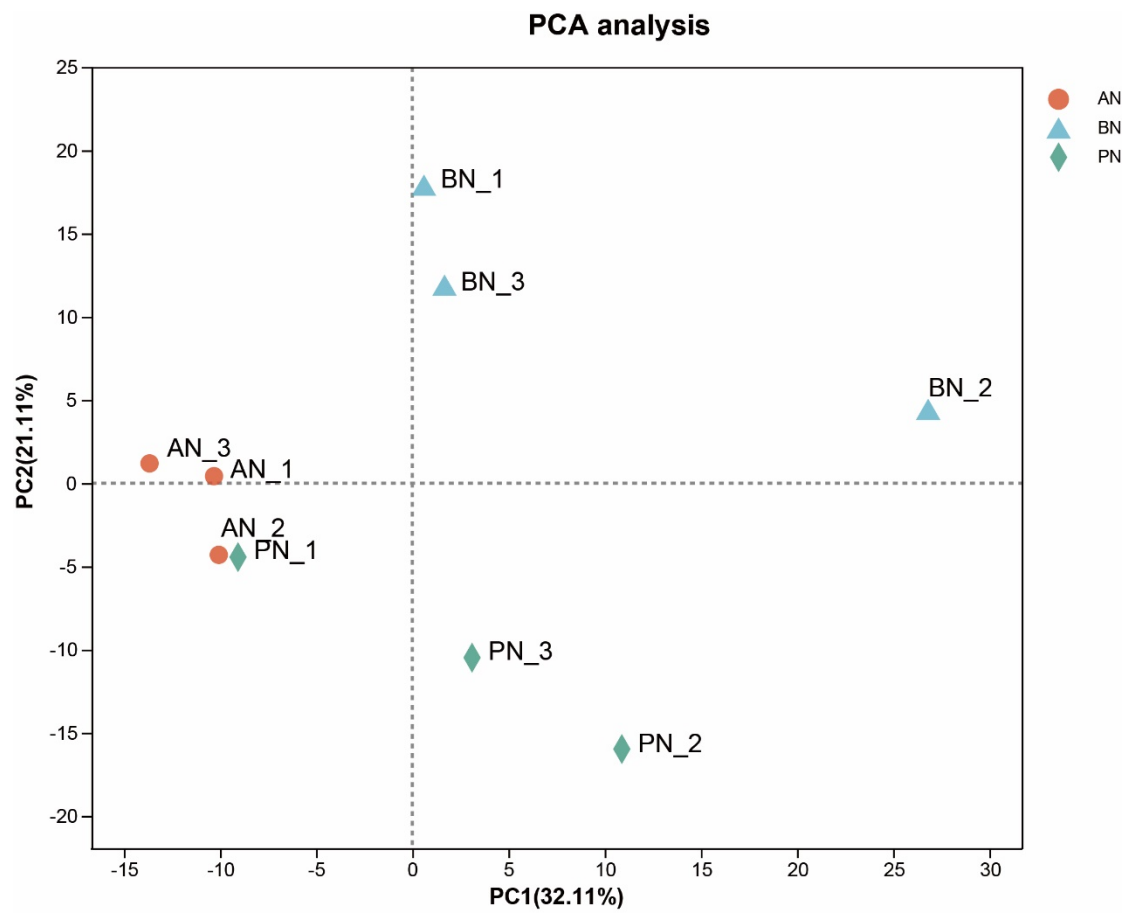

**Figures S1.** Principal component analysis of transcriptome data.

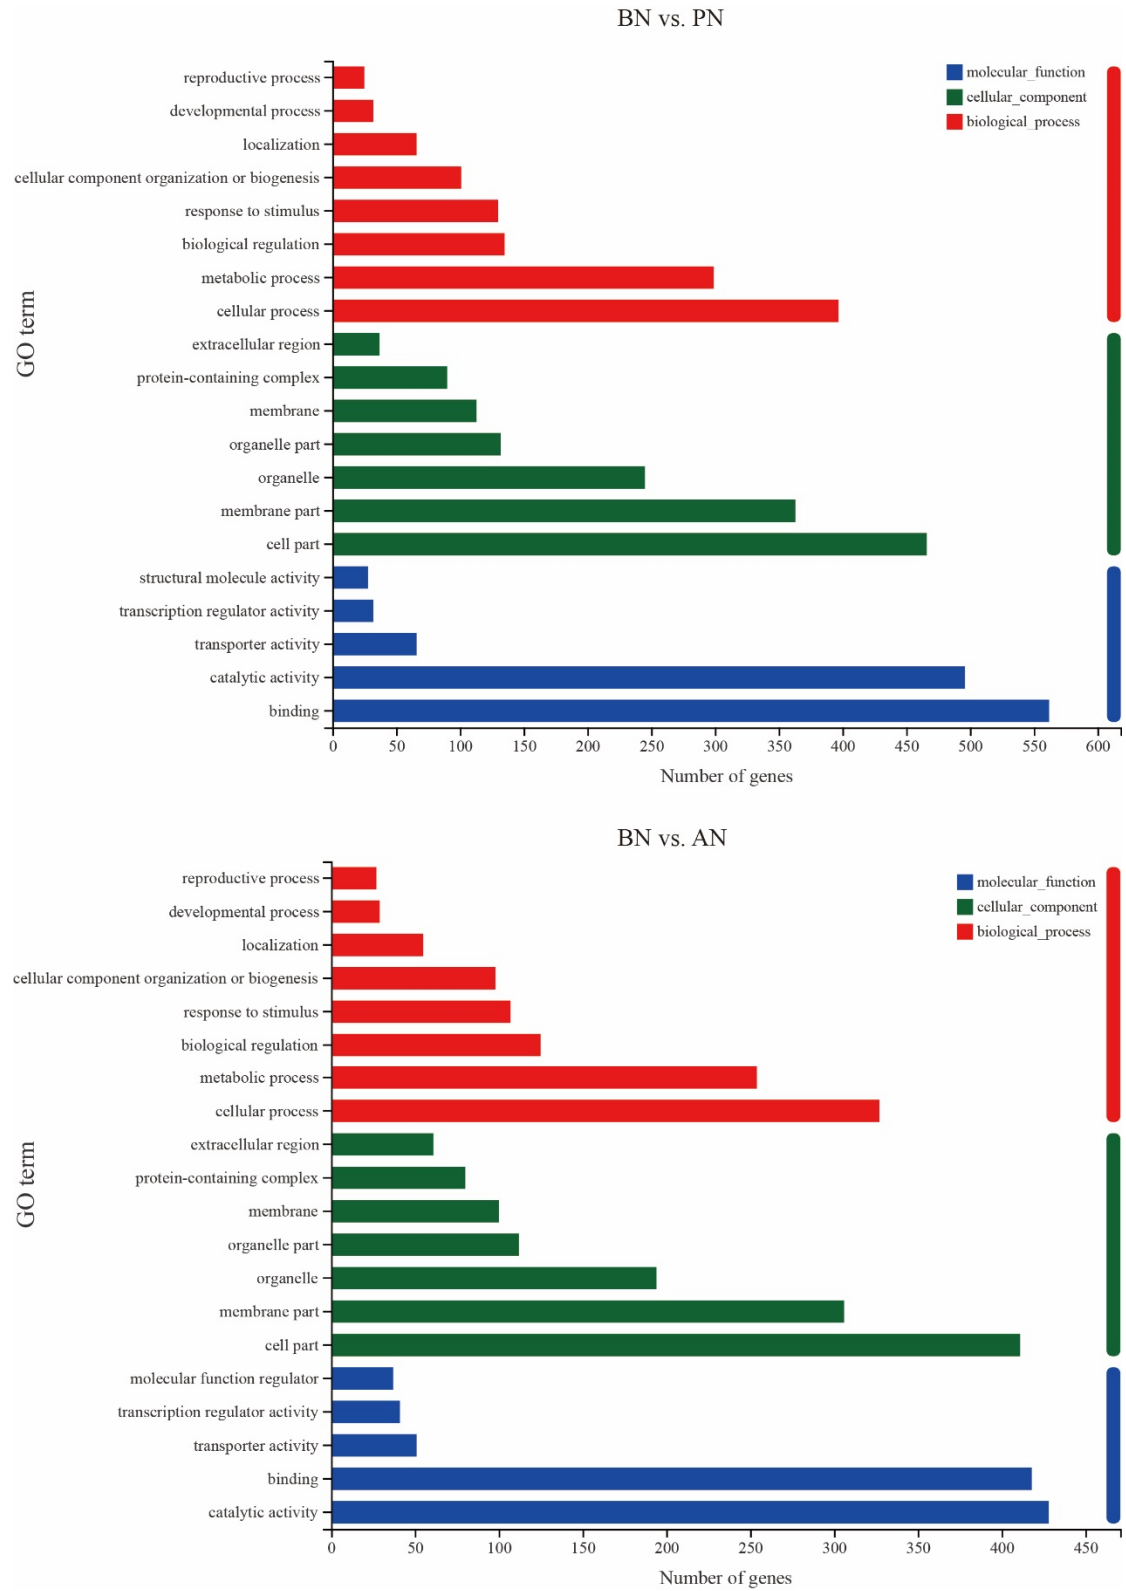

**Figure S2.** The DEGs gene ontology functional classification

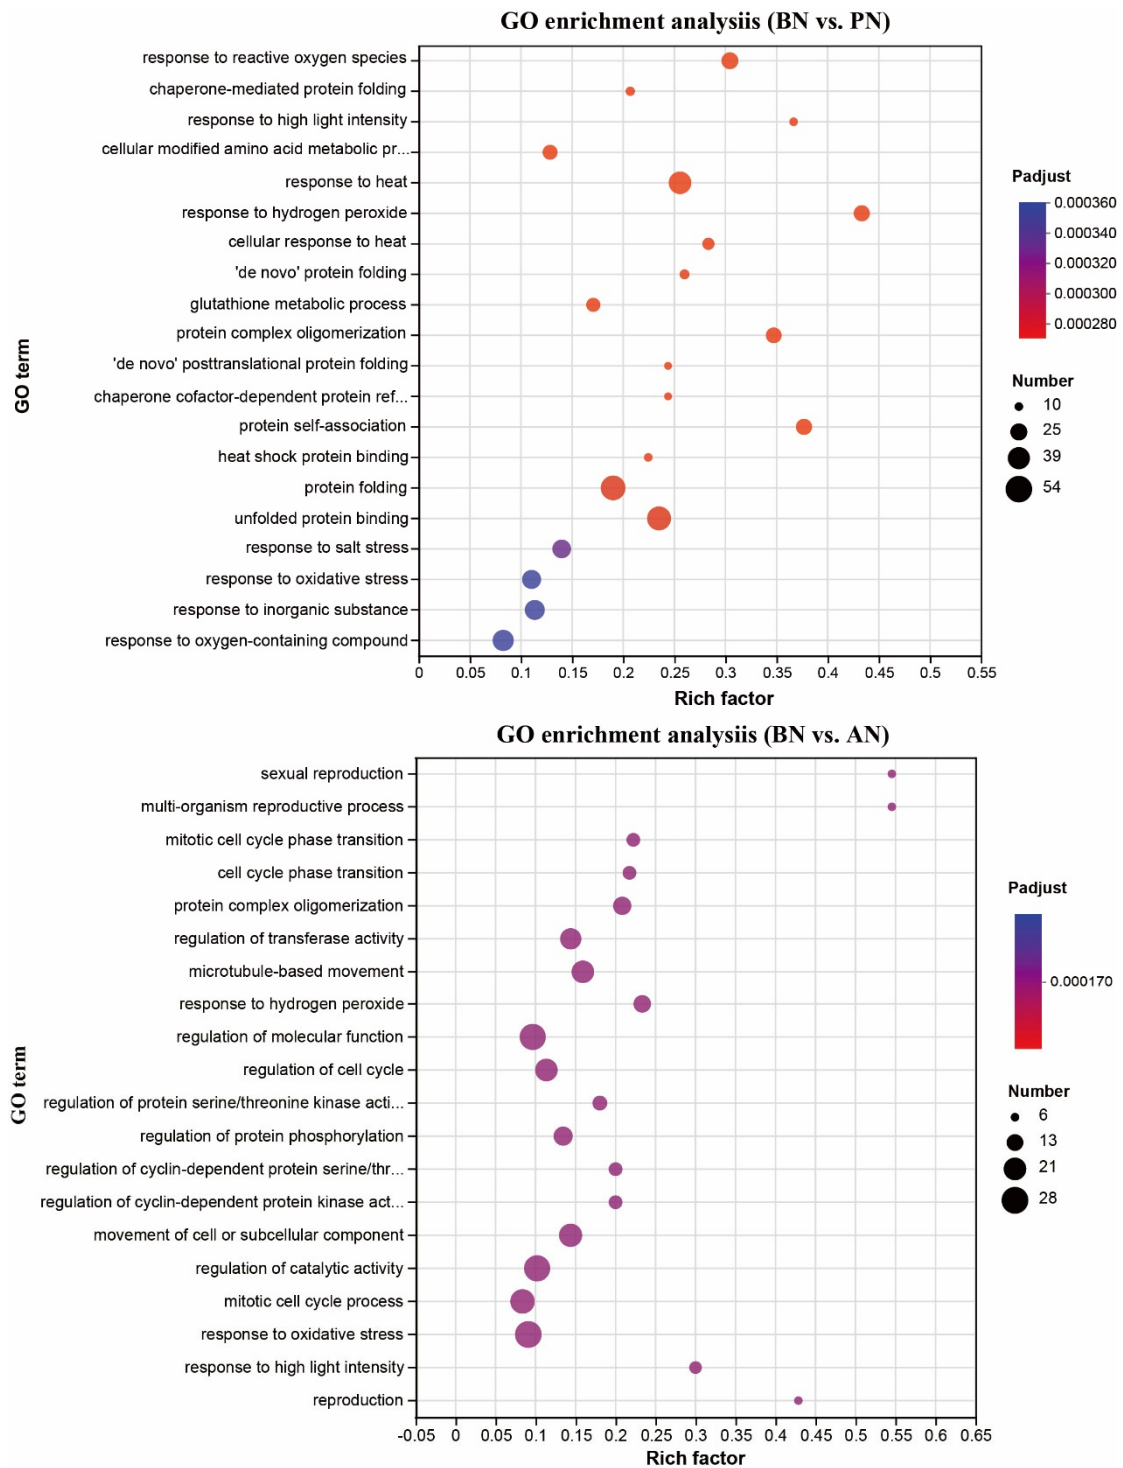

**Figure S3.** Go enrich analysis of DEGs

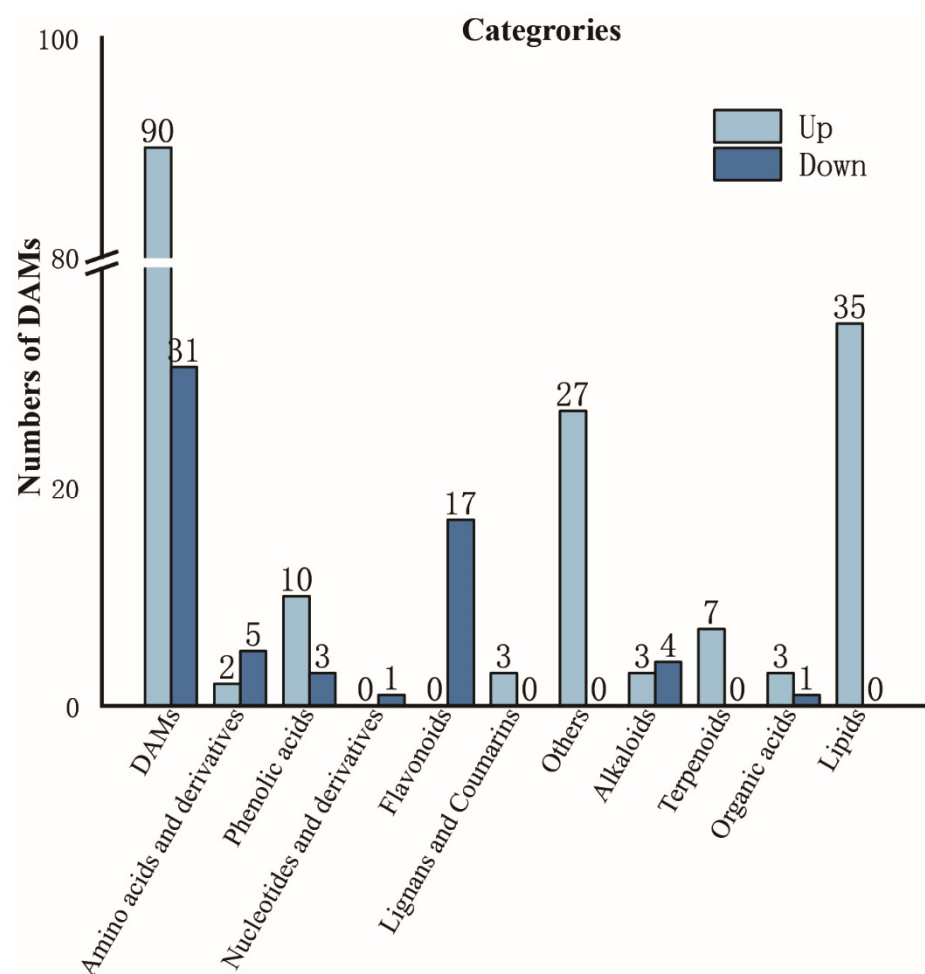

**Figure S4.** Categories of common DAMs in the comparison of BN vs. PN and BN vs.

AN

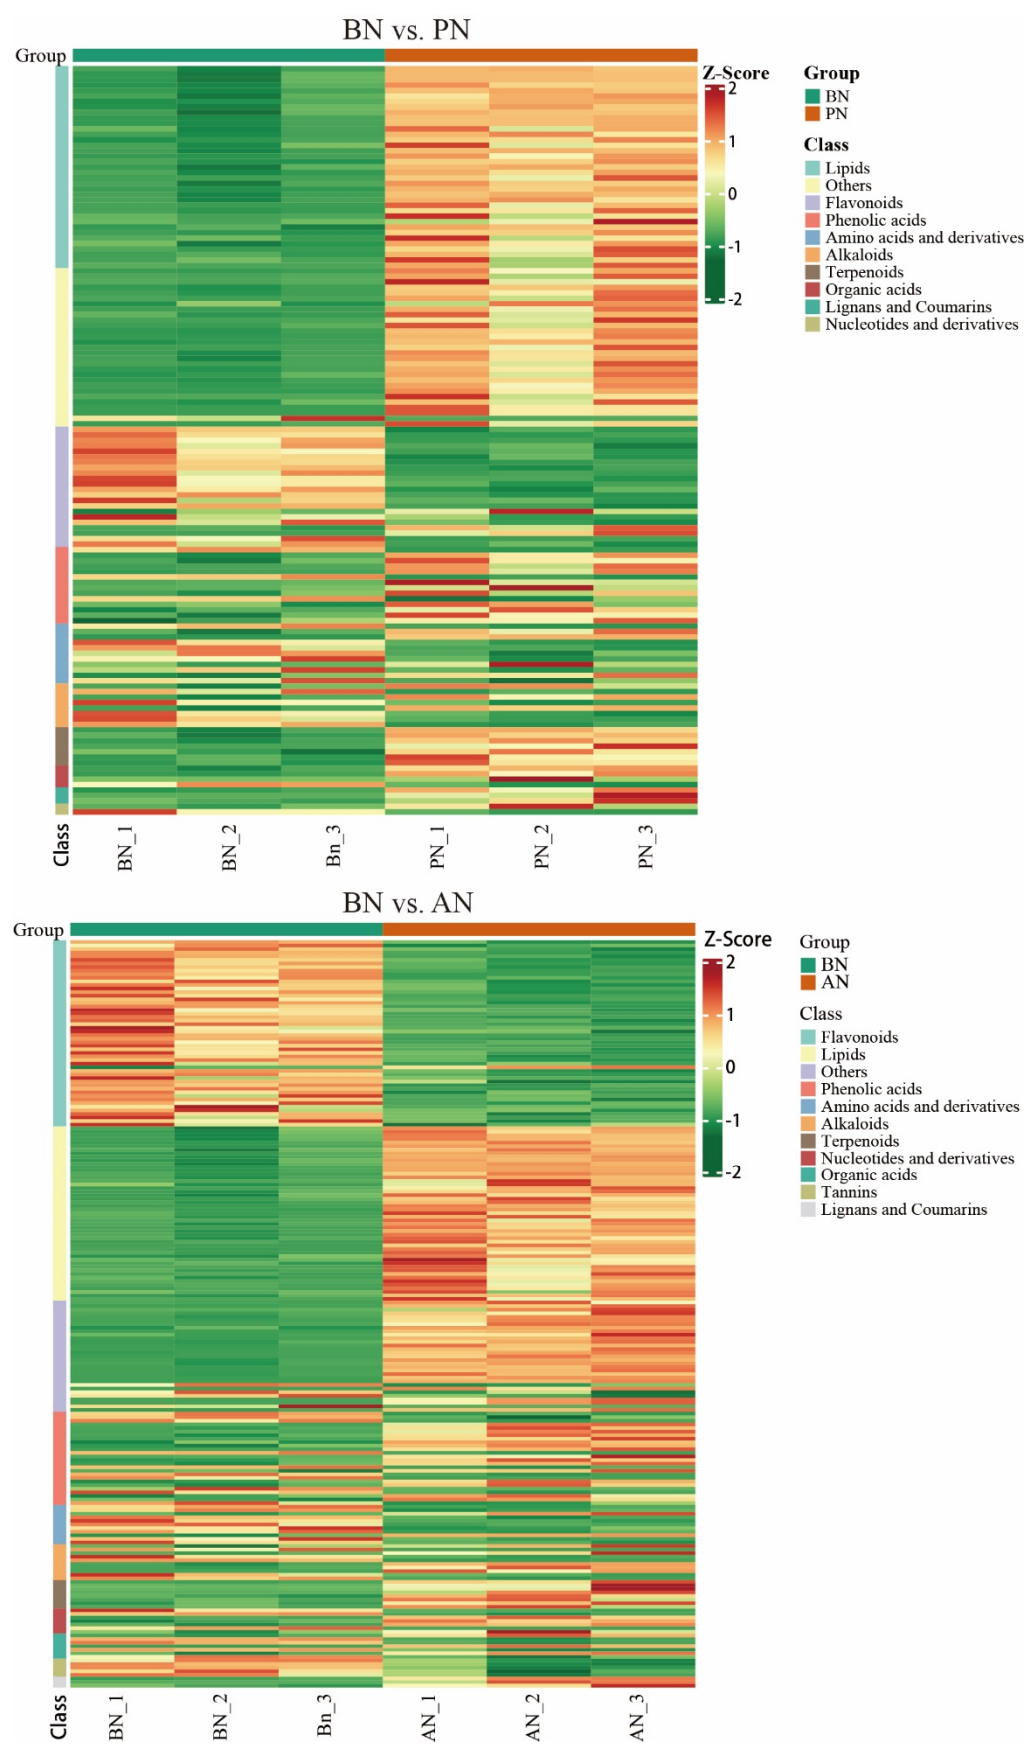

**Figure S5.** Clustering analysis of DAMs in the comparison of BN vs. PN and BN vs. AN

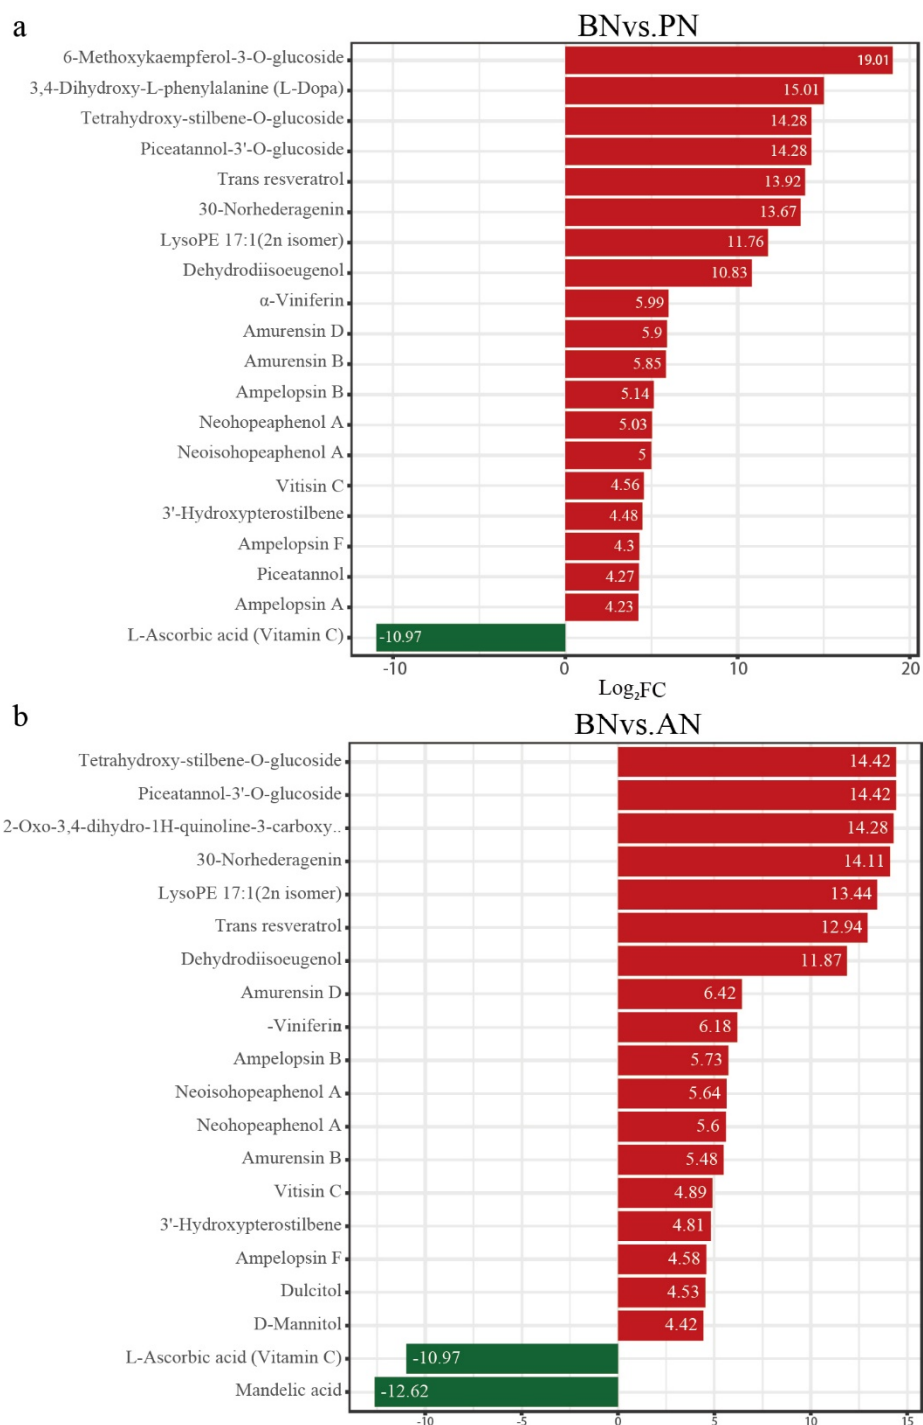

**Figure S6.** The bar graph of the top 20 differentially expressed metabolites.
