# Supplementary material for: Integrated Transcriptome and Metabolome Analysis Revealed the Causal Agent of Primary Bud Necrosis in ‘Summer Black’ Grape
Source: Int J Mol Sci. 2023 Jun 20;24(12):10410. doi: 10.3390/ijms241210410 (PMC10299459; doi:10.3390/ijms241210410)
Supplement: Supplementary file 1 [file ijms-24-10410-s001.zip › Supplementary Tables.xlsx]

## Sheet: Table S1
Table S1. Summary of sequencing data for samples of primary bud necrosis
Samples	Raw reads		Clean reads			Q20 (%)	Q30 (%)	GC (%)	Mapped genes
	Number	Total Nucleotides (nt)	Number	Total Nucleotides (nt)	Error rate(%)				Multiple mapped(%)	Uniquely mappedd(%)	Total mappedd(%)
BN_1	47220676	7130322076	46816638	6730492688	0.0246	98.17	94.49	46.12	1079247(2.43%)	36989573(83.22%)	38068820(85.65%)
BN_2	43588440	6581854440	43085118	6357876827	0.0248	98.08	94.35	45.5	1264983(2.46%)	42251266(82.32%)	43516249(84.78%)
BN_3	50834488	7676007688	50484554	7458229207	0.0248	98.1	94.3	46.05	1300214(2.39%)	45534741(83.81%)	46834955(86.2%)
PN_1	51421292	7764615092	51036024	7551676833	0.0248	98.11	94.33	46.92	1260743(2.55%)	40276536(81.46%)	41537279(84.01%)
PN_2	46465904	7016351504	46043550	6790240789	0.0252	97.93	93.97	46.76	1370917(2.98%)	38608523(83.85%)	39979440(86.83%)
PN_3	49851582	7527588882	49440452	7287751349	0.0252	97.96	93.99	46.97	1169414(2.29%)	41088624(80.51%)	42258038(82.8%)
AN_1	54794058	8273902758	54330270	8068439215	0.025	98.04	94.18	46.81	1345021(2.66%)	43476365(86.12%)	44821386(88.78%)
AN_2	51714178	7808840878	51327496	7591283515	0.0251	97.99	94.05	46.68	1147873(2.66%)	37449359(86.92%)	38597232(89.58%)
AN_3	44761706	6759017606	44446142	6547873114	0.0249	98.05	94.2	46.63	1205489(2.57%)	40272187(86.02%)	41477676(88.6%)
Total	440652324	66538500924	437010244	64383863537	-	-	-	-	-	-	-

## Sheet: Table S2
Table S2. The FPKM and fold change of DEGs in the comparison of BN vs. PN
Gene id	FC	Log2FC	Pvalue	Padjust	Regulate	FPKM
						BN_1	BN_3	PN_2	PN_3	BN	PN
Vitvi08g00138	0.431	-1.21571	2.1654e-07	4.25801e-06	up	677.93	441.21	227.05	257.19	559.57	242.12
Vitvi05g01757	2.162	1.11214	0.011208	0.0437552	up	1117.01	1672.81	3804.32	2388.94	1394.91	3096.63
Vitvi00g00541	2.322	1.21551	0.000776371	0.00498958	down	6.8	4.66	18.58	15.44	5.73	17.01
Vitvi00g00922	3.671	1.876	6.91974e-90	2.87377e-86	down	95.47	98.49	333.96	339.33	96.98	336.645
Vitvi00g00997	0.292	-1.77791	1.50762e-12	8.72028e-11	up	25.56	27.53	6.79	8.55	26.545	7.67
Vitvi00g01010	0.457	-1.1283	0.000683323	0.00449879	down	25.58	33.33	13.38	14.31	29.455	13.845
Vitvi00g01011	6.133	2.61669	8.60974e-80	2.55402e-76	up	19.29	18.56	118.69	109.26	18.925	113.975
Vitvi00g01047	0.001	-9.92048	3.98128e-11	1.80505e-09	down	8.34	12.42	0	0	10.38	0
Vitvi00g01061	2.165	1.11408	2.24999e-05	0.000247857	down	10.76	13.46	26.44	25.61	12.11	26.025
Vitvi00g01302	0.165	-2.59995	1.17955e-15	1.12873e-13	up	16.34	13.49	2.1	2.78	14.915	2.44
Vitvi00g01382	0.454	-1.14048	1.78972e-09	5.79776e-08	up	67.54	62.9	31.79	26.72	65.22	29.255
Vitvi00g01383	3.513	1.81288	8.54725e-15	7.1566e-13	down	32.26	53.48	143.59	152.34	42.87	147.965
Vitvi00g01412	2.164	1.11353	0.00440961	0.0208673	up	5.45	5.1	15.32	8.21	5.275	11.765
Vitvi00g01930	0.459	-1.12382	0.000292876	0.00221648	down	6.58	5.11	2.58	2.44	5.845	2.51
Vitvi00g02050	2.184	1.12703	1.829e-07	3.67304e-06	down	28.57	27.34	67.54	53.34	27.955	60.44
Vitvi00g02116	0.499	-1.00211	0.00751768	0.0319952	down	14.17	10.78	7.09	5.23	12.475	6.16
Vitvi00g02157	0.219	-2.18894	0.00149763	0.00858529	up	19.71	14.95	1.94	5.99	17.33	3.965
Vitvi00g02173	0.254	-1.97981	7.25891e-12	3.73097e-10	down	70.01	64.92	11.93	21.68	67.465	16.805
Vitvi00g02226	3.042	1.60506	0.00806728	0.033835	down	1.77	1.14	5.68	2.94	1.455	4.31
Vitvi00g02236	0.385	-1.37869	0.00203518	0.0110254	down	9.72	11.77	4	4.28	10.745	4.14
Vitvi00g02284	0.204	-2.2949	0.00827488	0.0344967	down	122.05	100.62	15.69	45.29	111.335	30.49
Vitvi00g02289	0.407	-1.29781	0.000665386	0.00440024	up	16.39	15.7	4.34	8.25	16.045	6.295
Vitvi01g00050	0.467	-1.09911	4.70152e-05	0.000466223	up	8.36	9.28	4.56	4.44	8.82	4.5
Vitvi01g00091	2.588	1.37161	4.0893e-17	4.69139e-15	up	19.19	22.03	51.69	53.65	20.61	52.67
Vitvi01g00164	2.245	1.16695	2.88866e-05	0.000306662	up	8.25	8.05	17.81	18.6	8.15	18.205
Vitvi01g00215	3.767	1.91333	1.82336e-08	4.67809e-07	up	9.8	18.21	58.02	46.58	14.005	52.3
Vitvi01g00239	2.821	1.49635	0.000290469	0.00220131	up	1.24	1.57	4.71	3.04	1.405	3.875
Vitvi01g00286	2.474	1.30682	0.000330719	0.00245089	up	2.41	2.73	6.52	6	2.57	6.26
Vitvi01g00290	4.491	2.16713	5.05497e-06	6.87404e-05	down	3.97	3.61	23.1	10.23	3.79	16.665
Vitvi01g00344	0.438	-1.19241	5.53759e-07	9.92132e-06	down	9.22	8.51	4.09	3.87	8.865	3.98
Vitvi01g00346	0.494	-1.01637	1.3042e-07	2.72179e-06	up	14.89	13.81	6.8	7.13	14.35	6.965
Vitvi01g00348	2.98	1.57554	0.00145746	0.00841843	up	3.57	2.6	10.71	7.6	3.085	9.155
Vitvi01g00408	4.217	2.07628	1.72888e-19	2.67912e-17	down	7.16	8.27	33.16	31.24	7.715	32.2
Vitvi01g00411	0.474	-1.07579	1.05354e-20	1.88593e-18	down	111.6	103.32	47.24	52.75	107.46	49.995
Vitvi01g00423	0.457	-1.12978	9.27785e-05	0.000837628	up	12.34	8.32	4.4	4.86	10.33	4.63
Vitvi01g00424	7.448	2.89693	1.16844e-42	7.58209e-40	down	11.44	14.31	98.61	93.16	12.875	95.885
Vitvi01g00433	0.21	-2.25167	0.00027105	0.00207841	down	21.52	9.13	3.25	3.31	15.325	3.28
Vitvi01g00478	0.498	-1.00622	3.43284e-06	4.90591e-05	down	101.81	79.02	31.85	29	90.415	30.425
Vitvi01g00499	0.302	-1.72782	2.16873e-16	2.30942e-14	up	15.73	14.44	4.12	4.83	15.085	4.475
Vitvi01g00502	2.467	1.30262	1.61534e-10	6.4754e-09	down	17.88	25.3	51.01	53.76	21.59	52.385
Vitvi01g00553	0.489	-1.03183	7.983e-06	0.000101016	up	5.74	5.54	2.48	2.92	5.64	2.7
Vitvi01g00554	2.308	1.20687	0.00187105	0.0102757	up	4.95	3.21	7.97	11.28	4.08	9.625
Vitvi01g00556	2.606	1.38193	6.3344e-06	8.29866e-05	up	18.89	37.74	72.53	72.75	28.315	72.64
Vitvi01g00648	3.654	1.8696	1.23556e-06	2.01069e-05	up	1.04	1.37	4.91	3.74	1.205	4.325
Vitvi01g00652	2.141	1.098	7.13003e-15	6.04307e-13	up	58.57	53.57	126.86	115.92	56.07	121.39
Vitvi01g00663	2.089	1.06253	3.99249e-06	5.6092e-05	up	6.59	6.68	12.76	14.54	6.635	13.65
Vitvi01g00735	2.029	1.02086	2.55286e-10	1.00019e-08	down	39.5	33.86	74.02	72.72	36.68	73.37
Vitvi01g00753	0.333	-1.58781	1.35053e-13	9.13481e-12	down	19.64	25.5	3.96	6.17	22.57	5.065
Vitvi01g00824	0.476	-1.07017	6.29701e-06	8.2601e-05	down	6.27	7.51	3.36	3.68	6.89	3.52
Vitvi01g00830	0.462	-1.11297	3.41733e-18	4.54878e-16	up	54.19	55	23.77	27.23	54.595	25.5
Vitvi01g00850	3.259	1.70421	0.0105267	0.0415486	down	7.77	11.82	43.39	18.58	9.795	30.985
Vitvi01g00862	0.391	-1.35466	3.71166e-13	2.38615e-11	down	9.87	9.32	3.45	3.89	9.595	3.67
Vitvi01g00911	0.38	-1.39569	3.15869e-07	5.94652e-06	down	12.02	8.76	3.78	3.98	10.39	3.88
Vitvi01g01019	0.285	-1.80899	0.00179785	0.00996327	down	4.43	2.64	0.81	1.18	3.535	0.995
Vitvi01g01038	0.473	-1.07862	5.48409e-11	2.39238e-09	down	683.15	568.21	314.19	272.02	625.68	293.105
Vitvi01g01071	0.487	-1.03655	8.28952e-08	1.8215e-06	down	15.93	13.13	6.93	7.23	14.53	7.08
Vitvi01g01169	0.301	-1.73049	1.10708e-09	3.70783e-08	up	7.55	8.06	2.01	2.62	7.805	2.315
Vitvi01g01236	2.128	1.08957	4.33553e-22	8.91359e-20	up	36.76	34.89	72.51	77.31	35.825	74.91
Vitvi01g01257	2.898	1.53526	0.00293757	0.0149984	down	1.36	2.31	7.8	11.42	1.835	9.61
Vitvi01g01301	0.296	-1.7574	0.000193605	0.00156433	down	7.95	5.13	1.48	2.39	6.54	1.935
Vitvi01g01357	0.373	-1.42327	8.01449e-11	3.37568e-09	up	80.45	63.45	30.9	23.2	71.95	27.05
Vitvi01g01512	6.126	2.61506	6.28575e-25	1.57257e-22	up	11.09	11.73	80.25	57.94	11.41	69.095
Vitvi01g01534	3.825	1.93531	1.20162e-06	1.96556e-05	up	2.05	2.7	7.75	10.24	2.375	8.995
Vitvi01g01537	5.36	2.42213	3.40997e-08	8.30105e-07	up	16.52	28.7	163.31	78	22.61	120.655
Vitvi01g01538	6.861	2.77835	2.16266e-06	3.24711e-05	up	45.44	109.62	537.75	506.06	77.53	521.905
Vitvi01g01561	2.675	1.4195	2.36876e-05	0.000258609	up	2.15	2.82	6.68	6.38	2.485	6.53
Vitvi01g01564	2.507	1.32621	1.85218e-12	1.06539e-10	down	14.55	16.27	39.17	37.16	15.41	38.165
Vitvi01g01638	0.424	-1.23663	0.000157168	0.00130963	up	24.27	25.57	10.98	10.43	24.92	10.705
Vitvi01g01651	2.196	1.13518	3.25415e-06	4.69253e-05	up	33.65	41.93	93.44	73.27	37.79	83.355
Vitvi01g01680	3.617	1.85486	5.25485e-11	2.31671e-09	up	45.74	64.18	242.59	149.82	54.96	196.205
Vitvi01g01708	4.713	2.23652	4.09043e-20	6.68801e-18	up	7.47	10.13	45.19	36.21	8.8	40.7
Vitvi01g01737	5.277	2.3997	0.00613214	0.0272139	up	17.21	59.95	245.7	150.25	38.58	197.975
Vitvi01g01865	2.843	1.50766	0.00196891	0.0107336	down	8.33	11.3	38.89	16.27	9.815	27.58
Vitvi01g01883	0.286	-1.80467	0.00030433	0.00229333	down	33.61	15.05	4.9	9.16	24.33	7.03
Vitvi01g01884	0.279	-1.84165	0.00247709	0.013022	up	7.33	4.76	1.4	2.36	6.045	1.88
Vitvi01g01902	3.794	1.92374	8.27345e-05	0.000760169	down	5.78	9.81	40.14	18.15	7.795	29.145
Vitvi01g01960	0.416	-1.26558	0.00400579	0.0193353	down	17.46	13.04	5.26	7.64	15.25	6.45
Vitvi01g01970	0.431	-1.21394	1.06323e-17	1.32203e-15	down	28.72	26.74	11.94	13.88	27.73	12.91
Vitvi01g01979	0.251	-1.99321	1.79884e-05	0.000202346	up	45.06	20.83	5.93	10.7	32.945	8.315
Vitvi01g01999	2.252	1.17153	5.78104e-06	7.68523e-05	up	10.49	15.66	26.57	31.64	13.075	29.105
Vitvi01g02000	2.217	1.1486	3.33908e-06	4.80166e-05	down	105.63	193.02	316.14	364.16	149.325	340.15
Vitvi01g02071	0.478	-1.06351	1.71402e-07	3.47235e-06	down	10.2	10.76	6.84	8.04	10.48	7.44
Vitvi01g02174	0.447	-1.16133	7.51633e-13	4.56364e-11	up	15.13	14.76	9.61	9.41	14.945	9.51
Vitvi01g02270	2.606	1.38209	1.3655e-13	9.17628e-12	up	167.12	162.81	488.24	381.24	164.965	434.74
Vitvi01g02290	4.949	2.30724	0.00203078	0.0110045	up	15.01	44.61	170.26	59.45	29.81	114.855
Vitvi02g00025	42.513	5.40982	1.00123e-192	1.03953e-188	up	10.03	11.02	494.51	381.03	10.525	437.77
Vitvi02g00031	2.506	1.32544	4.56235e-11	2.04175e-09	up	46.57	45.21	127.89	100.89	45.89	114.39
Vitvi02g00046	5.733	2.51921	0.000772527	0.00496988	up	0.47	2.7	7.27	10.72	1.585	8.995
Vitvi02g00095	3.503	1.80858	2.88881e-07	5.49089e-06	up	10.84	10.95	42.35	35.79	10.895	39.07
Vitvi02g00108	2.456	1.29609	2.87395e-05	0.000305569	up	6.04	8.94	14.12	22.14	7.49	18.13
Vitvi02g00187	2.517	1.33153	7.03914e-23	1.50688e-20	up	166.08	156.76	425.61	370.29	161.42	397.95
Vitvi02g00195	2.905	1.53844	0.00340135	0.0168848	up	1.34	1.39	3.73	3.9	1.365	3.815
Vitvi02g00211	4.371	2.12786	0.00345025	0.0170501	up	0.62	0.35	1.98	2.16	0.485	2.07
Vitvi02g00219	3.322	1.7319	3.94817e-05	0.00040406	up	3.28	7.15	19.23	14.8	5.215	17.015
Vitvi02g00223	2.051	1.03659	0.0112221	0.0438019	down	14.51	14.93	24.2	38.66	14.72	31.43
Vitvi02g00260	0.454	-1.13775	6.39352e-14	4.6747e-12	up	16.91	19.12	8.87	10.8	18.015	9.835
Vitvi02g00270	4.659	2.21999	2.03906e-10	8.06497e-09	up	4.54	4.92	26.58	16.61	4.73	21.595
Vitvi02g00282	2.183	1.12629	1.0474e-05	0.000127311	up	11.06	10.42	24.12	22.47	10.74	23.295
Vitvi02g00338	2.295	1.1986	6.9468e-09	1.98146e-07	down	27.17	36.5	78.69	64.42	31.835	71.555
Vitvi02g00354	0.393	-1.34843	1.15925e-08	3.10203e-07	down	33.46	37.51	12.65	15.18	35.485	13.915
Vitvi02g00367	0.456	-1.13184	6.42104e-12	3.34168e-10	up	15.58	15.18	6.54	7.21	15.38	6.875
Vitvi02g00374	3.845	1.94308	4.70769e-23	1.05113e-20	down	23.65	30.76	108.47	100.06	27.205	104.265
Vitvi02g00385	0.452	-1.14581	2.8267e-15	2.54097e-13	down	20.06	17.47	8.02	8.68	18.765	8.35
Vitvi02g00386	0.406	-1.2989	1.59299e-11	7.78318e-10	down	181.95	145.45	66.7	67.14	163.7	66.92
Vitvi02g00457	0.456	-1.13365	1.31654e-06	2.13245e-05	up	28.66	23.88	11.33	12.35	26.27	11.84
Vitvi02g00514	1281.44	10.3235	3.75867e-12	2.01676e-10	up	0	0	8.32	6.8	0	7.56
Vitvi02g00519	2.397	1.2611	0.000242525	0.00189538	up	4.36	7.63	15.1	14.17	5.995	14.635
Vitvi02g00521	2.456	1.29618	6.8944e-05	0.000648379	down	3.03	2.62	6.55	6.97	2.825	6.76
Vitvi02g00523	0.424	-1.23862	0.000101211	0.000901997	up	15.9	18.05	8.25	6	16.975	7.125
Vitvi02g00533	2.162	1.11239	0.0115083	0.0446461	down	41.15	79.67	128.8	128.67	60.41	128.735
Vitvi02g00607	0.472	-1.08323	5.5088e-27	1.63415e-24	up	25.62	24.53	11.4	11.7	25.075	11.55
Vitvi02g00633	2.405	1.26605	4.48133e-06	6.15035e-05	down	4.4	3.81	10.39	9.07	4.105	9.73
Vitvi02g00701	0.481	-1.05627	0.0102126	0.0406566	down	26.55	11.77	9.22	8.78	19.16	9
Vitvi02g00785	0.471	-1.08673	4.37067e-13	2.78396e-11	down	52.24	46.14	22.95	23.19	49.19	23.07
Vitvi02g00802	0.026	-5.28728	0.00420942	0.0201356	down	5.45	1.7	0	0.18	3.575	0.09
Vitvi02g00936	0.413	-1.27481	1.39664e-12	8.14643e-11	down	36.81	32.85	13.6	19.3	34.83	16.45
Vitvi02g00972	0.389	-1.36192	7.73425e-09	2.17323e-07	down	4.65	6.23	2.61	2.75	5.44	2.68
Vitvi02g01251	0.218	-2.19708	1.92072e-06	2.94128e-05	down	19.8	11.08	2.49	4.24	15.44	3.365
Vitvi02g01253	0.483	-1.04948	7.28741e-09	2.07576e-07	up	12.43	15.79	12.11	12.85	14.11	12.48
Vitvi02g01299	2.195	1.13443	0.000112433	0.000984676	up	6.91	4.85	13.65	11.69	5.88	12.67
Vitvi02g01321	2.332	1.22129	0.00446067	0.0210657	down	2.12	3.21	6.63	5.72	2.665	6.175
Vitvi02g01367	0.376	-1.41233	6.73852e-07	1.17584e-05	up	18.6	16.7	5.88	8.82	17.65	7.35
Vitvi02g01415	2.166	1.11479	4.69516e-13	2.96337e-11	up	61.12	75.08	138.73	156.94	68.1	147.835
Vitvi02g01438	2.56	1.35609	3.99692e-07	7.41699e-06	up	126.4	93.47	258.46	340.06	109.935	299.26
Vitvi02g01446	27.194	4.76521	2.05204e-11	9.79553e-10	up	3.87	10.57	232.76	154.2	7.22	193.48
Vitvi02g01447	83.316	6.38051	1.13699e-14	9.29514e-13	up	0.21	0.2	18.28	14.55	0.205	16.415
Vitvi02g01456	3.598	1.84723	3.51141e-32	1.37574e-29	up	153.47	206.8	649.37	670.11	180.135	659.74
Vitvi02g01459	3.875	1.95438	2.1821e-20	3.71403e-18	up	38.89	55.86	168.38	201.12	47.375	184.75
Vitvi02g01467	2.132	1.09205	0.00918738	0.0373851	down	1.76	2.35	4.02	4.51	2.055	4.265
Vitvi02g01494	0.286	-1.80536	4.09413e-26	1.08993e-23	down	7.94	8.14	2.85	2.72	8.04	2.785
Vitvi02g01507	0.268	-1.90171	0.0041839	0.0200458	down	9.64	3.16	1.6	1.81	6.4	1.705
Vitvi02g01511	0.231	-2.11225	1.63857e-08	4.2425e-07	up	15.49	19.37	3.92	4.15	17.43	4.035
Vitvi02g01640	2.879	1.52573	0.00871657	0.0359912	down	153.14	300.04	794.24	495.17	226.59	644.705
Vitvi02g01663	0.346	-1.53267	8.22364e-21	1.49793e-18	down	47.02	43.42	23.9	24.94	45.22	24.42
Vitvi02g01704	0.247	-2.01517	6.15194e-19	8.87119e-17	down	29.21	31.1	7.79	6.91	30.155	7.35
Vitvi02g01784	0.383	-1.38441	0.00297598	0.015135	down	5.88	6.96	2.98	2	6.42	2.49
Vitvi02g01788	0.076	-3.72072	1.34137e-10	5.47222e-09	down	7.42	9.9	0.38	0.94	8.66	0.66
Vitvi02g01822	0.425	-1.23417	8.21684e-14	5.88354e-12	up	52.17	52.53	19.56	24.36	52.35	21.96
Vitvi02g01827	2.196	1.13473	1.77043e-13	1.16708e-11	up	211.29	218.69	513.35	423.96	214.99	468.655
Vitvi02g01852	2.656	1.40906	9.5282e-18	1.19911e-15	down	28.14	30	78.1	75.29	29.07	76.695
Vitvi03g00047	0.251	-1.99201	0.00103533	0.006332	up	4.03	3.9	0.87	1.19	3.965	1.03
Vitvi03g00074	2.481	1.31083	0.0107205	0.0421451	down	5.35	4.84	17.29	7.63	5.095	12.46
Vitvi03g00083	0.328	-1.60828	0.00652817	0.028647	down	8.36	3.55	1.59	2.3	5.955	1.945
Vitvi03g00118	0.461	-1.11577	6.34207e-11	2.71532e-09	down	29.6	26.19	13.15	15.03	27.895	14.09
Vitvi03g00130	0.42	-1.25075	2.61262e-20	4.37508e-18	up	133.97	124.55	47.91	58.81	129.26	53.36
Vitvi03g00148	2.182	1.12534	7.62993e-14	5.50123e-12	up	74.52	83.02	160.18	185.98	78.77	173.08
Vitvi03g00149	3.095	1.63006	1.48038e-05	0.000170874	down	2.61	4.03	11.31	8.88	3.32	10.095
Vitvi03g00170	0.485	-1.04539	1.7285e-10	6.88913e-09	down	20	20.96	9.52	10.59	20.48	10.055
Vitvi03g00190	0.407	-1.2978	1.17632e-15	1.12873e-13	up	6.79	6.07	2.43	2.68	6.43	2.555
Vitvi03g00206	3.138	1.64991	0.000219567	0.00174086	down	226.43	399.76	1118.56	837.62	313.095	978.09
Vitvi03g00251	0.488	-1.03369	0.00102602	0.00628472	down	14.45	14.62	5.33	8.71	14.535	7.02
Vitvi03g00267	0.415	-1.26874	0.0113918	0.0443145	up	10.46	7.25	3.87	3.51	8.855	3.69
Vitvi03g00300	4.271	2.09444	1.91785e-09	6.16473e-08	up	5.11	9.68	35.79	27.07	7.395	31.43
Vitvi03g00301	4.201	2.07064	0.00174549	0.00974594	down	1.91	5.14	16.86	12.7	3.525	14.78
Vitvi03g00306	0.446	-1.1664	2.51535e-17	2.98464e-15	up	55.54	49.82	21.39	24.65	52.68	23.02
Vitvi03g00482	2.011	1.00798	1.34538e-05	0.000157831	down	6.92	8.15	13.9	15.96	7.535	14.93
Vitvi03g00508	0.436	-1.19628	2.75657e-05	0.000293992	up	78.93	56.99	21.37	37.36	67.96	29.365
Vitvi03g00514	2.156	1.10852	6.14092e-11	2.64557e-09	up	30.75	30.38	67.71	63.08	30.565	65.395
Vitvi03g00586	3.029	1.59879	0.00146553	0.00843921	down	26.43	50.3	130.24	95.09	38.365	112.665
Vitvi03g00650	0.358	-1.48365	3.33232e-21	6.34822e-19	up	25.98	24.57	9.44	9.43	25.275	9.435
Vitvi03g00726	2.31	1.20763	0.00500244	0.0231301	up	0.99	1.04	1.7	2.91	1.015	2.305
Vitvi03g00743	2.286	1.19286	0.000167139	0.00138163	up	9.97	13.74	29.47	24.32	11.855	26.895
Vitvi03g00779	4.379	2.13053	0.000250104	0.00194001	up	0.45	0.97	2.99	3.08	0.71	3.035
Vitvi03g00781	2.634	1.39703	0.00633127	0.0279543	up	0.62	1.25	1.91	2.93	0.935	2.42
Vitvi03g00786	2.716	1.44123	1.06299e-10	4.39699e-09	up	9.79	9.65	28.52	23.44	9.72	25.98
Vitvi03g00790	3.545	1.82569	7.64849e-18	9.6842e-16	up	19.35	18.13	73.57	57.31	18.74	65.44
Vitvi03g00811	2.049	1.03514	0.000541409	0.00368527	up	2.77	3.12	6.21	5.66	2.945	5.935
Vitvi03g00845	2.028	1.01977	2.24725e-19	3.40614e-17	up	47.88	50.93	97.92	94.97	49.405	96.445
Vitvi03g01173	2.471	1.30494	2.6532e-12	1.47309e-10	up	30.72	42.74	85.8	99.56	36.73	92.68
Vitvi03g01213	2.343	1.22819	0.000745039	0.00483461	down	2.82	1.8	5.67	4.95	2.31	5.31
Vitvi03g01242	0.382	-1.38698	4.72343e-13	2.97218e-11	up	10.57	9.79	3.43	4.22	10.18	3.825
Vitvi03g01281	2.431	1.28182	0.00888682	0.0364549	down	2.43	7.26	11.18	11.94	4.845	11.56
Vitvi03g01334	2.104	1.073	0.000921925	0.00576272	up	19.05	14.76	36.96	35.64	16.905	36.3
Vitvi03g01371	0.357	-1.48502	1.12712e-15	1.09881e-13	down	4040	3276.41	1291.38	1488.47	3658.2	1389.92
Vitvi03g01391	2.915	1.54368	4.72473e-09	1.38377e-07	up	4.13	4.81	12.97	14.69	4.47	13.83
Vitvi03g01472	0.299	-1.73961	0.000633408	0.00422509	down	13.39	19.34	6.16	3.69	16.365	4.925
Vitvi03g01479	0.138	-2.85742	2.34753e-09	7.40827e-08	down	57.76	36.73	8.77	4.57	47.245	6.67
Vitvi03g01524	0.464	-1.1087	3.52707e-17	4.0916e-15	down	70.58	73.24	30.11	35.49	71.91	32.8
Vitvi03g01527	0.172	-2.53984	1.88141e-08	4.80534e-07	down	30.9	31.39	6.6	4.49	31.145	5.545
Vitvi03g01540	2.527	1.33761	0.00378035	0.0183838	up	2.53	3.92	5.7	10.41	3.225	8.055
Vitvi03g01555	2.547	1.34867	1.98821e-16	2.15027e-14	up	31.8	37.84	88.23	87.84	34.82	88.035
Vitvi03g01612	0.43	-1.2172	0.00418547	0.0200488	down	15.73	13.96	7.48	5.36	14.845	6.42
Vitvi03g01615	2.458	1.29746	7.52416e-05	0.000700938	up	9.91	18.75	37.66	31.66	14.33	34.66
Vitvi03g01630	4.741	2.24522	7.60235e-10	2.64427e-08	up	0.94	0.71	3.6	4.12	0.825	3.86
Vitvi03g01634	0.328	-1.60938	6.48981e-06	8.48086e-05	down	13.24	18.92	4.36	6.08	16.08	5.22
Vitvi03g01650	7.131	2.83409	6.28786e-16	6.36914e-14	up	12.66	10.56	107.13	58.11	11.61	82.62
Vitvi03g01759	2.71	1.43838	1.63798e-05	0.000186269	up	8.12	6.78	18.57	21.97	7.45	20.27
Vitvi03g01766	0.434	-1.2037	6.84893e-07	1.1921e-05	down	16.89	14.78	5.9	8.16	15.835	7.03
Vitvi03g01780	3.312	1.72786	1.99817e-08	5.07857e-07	up	16.44	31.15	72.33	84.24	23.795	78.285
Vitvi03g01897	2.327	1.21865	9.59214e-05	0.00085965	up	5.11	5.9	11.05	14.36	5.505	12.705
Vitvi04g00029	2.489	1.31538	7.29283e-06	9.36522e-05	up	5.31	3.33	12.09	11.27	4.32	11.68
Vitvi04g00039	2.241	1.16383	4.13486e-10	1.53872e-08	up	12.77	14.39	31.12	30.46	13.58	30.79
Vitvi04g00064	2.36	1.23883	2.41748e-12	1.35307e-10	up	38.46	43.68	94.46	99.8	41.07	97.13
Vitvi04g00089	2.563	1.35802	0.000521604	0.00358408	up	1.63	1.85	3.69	5.1	1.74	4.395
Vitvi04g00092	10.638	3.41122	6.81412e-69	1.08842e-65	up	15.13	22.67	187.13	203.44	18.9	195.285
Vitvi04g00135	19.97	4.31977	3.63767e-74	7.55361e-71	up	6.32	6.11	135.58	109.48	6.215	122.53
Vitvi04g00161	0.349	-1.51897	1.05142e-12	6.22015e-11	down	19.87	18.55	5.79	7.4	19.21	6.595
Vitvi04g00227	2.807	1.48928	2.38676e-11	1.13672e-09	up	16.93	22.27	53.84	55.97	19.6	54.905
Vitvi04g00236	2.24	1.16362	0.000354853	0.00258999	up	4.56	5.77	9.21	13.58	5.165	11.395
Vitvi04g00345	0.371	-1.43155	2.32394e-07	4.50155e-06	down	24	20.69	6.58	8.01	22.345	7.295
Vitvi04g00352	4.65	2.21717	0.00106077	0.00646139	up	0.7	2.4	5.45	8.88	1.55	7.165
Vitvi04g00365	2.016	1.01122	0.00267655	0.0139049	up	2.12	2.56	3.35	5.9	2.34	4.625
Vitvi04g00392	0.487	-1.03776	2.64116e-19	3.9174e-17	down	19.96	18.78	9	9.26	19.37	9.13
Vitvi04g00433	0.297	-1.7492	2.24378e-15	2.08933e-13	down	49.42	40.08	11.72	14.63	44.75	13.175
Vitvi04g00511	2.013	1.0094	1.61586e-06	2.54384e-05	up	52.13	70.86	140.57	111.37	61.495	125.97
Vitvi04g00516	2.388	1.25558	2.13507e-12	1.20803e-10	up	30.12	32.59	80.45	67.01	31.355	73.73
Vitvi04g00522	2.405	1.26608	2.35281e-14	1.82299e-12	up	6.48	7.1	16.76	15.84	6.79	16.3
Vitvi04g00533	2.038	1.02715	2.63187e-07	5.04158e-06	up	10.76	11.23	20.02	24.17	10.995	22.095
Vitvi04g00602	2.638	1.39956	4.26975e-05	0.000431232	up	16	16.82	30.04	56.9	16.41	43.47
Vitvi04g00607	2.999	1.5844	1.64822e-06	2.58695e-05	up	13.28	19.95	56.18	44.36	16.615	50.27
Vitvi04g00612	2.034	1.02426	8.23475e-08	1.81138e-06	up	121.87	184.25	298.95	312.97	153.06	305.96
Vitvi04g00626	2.742	1.45528	0.00430448	0.0204724	up	4.96	4.98	18.69	9.18	4.97	13.935
Vitvi04g00632	3.024	1.59656	4.56406e-05	0.0004552	up	1.62	2.7	7.68	5.02	2.16	6.35
Vitvi04g00747	2.954	1.56262	8.88398e-09	2.46296e-07	up	7.16	8.91	27.11	19	8.035	23.055
Vitvi04g00761	2.072	1.0511	0.000149009	0.00125168	up	3.06	3.62	5.89	7.71	3.34	6.8
Vitvi04g00769	0.494	-1.0163	1.41331e-10	5.73326e-09	down	15.86	15.1	6.62	7.96	15.48	7.29
Vitvi04g00803	6.719	2.7483	4.19381e-05	0.000425425	up	0.53	1.13	8.23	2.62	0.83	5.425
Vitvi04g00890	2.355	1.2357	0.00106791	0.00649158	up	1.79	2.8	5.82	4.77	2.295	5.295
Vitvi04g00962	4.093	2.03304	3.36327e-21	6.34893e-19	up	10.37	13.28	48.06	47.08	11.825	47.57
Vitvi04g01041	0.444	-1.17104	1.61594e-13	1.07548e-11	down	12.2	14	7.06	7	13.1	7.03
Vitvi04g01100	2.015	1.01105	0.00464767	0.0218395	up	4.3	5.44	11.28	8.02	4.87	9.65
Vitvi04g01198	2.723	1.44519	2.36541e-15	2.19276e-13	up	120.6	90.27	294.91	270.65	105.435	282.78
Vitvi04g01231	2.023	1.01623	2.7463e-09	8.57547e-08	up	15.53	18.29	34.09	32.25	16.91	33.17
Vitvi04g01287	2.477	1.30844	1.73911e-06	2.71115e-05	up	5.25	7.51	16.64	15.1	6.38	15.87
Vitvi04g01299	2.093	1.06582	0.00392583	0.0190079	up	2.83	2.34	4.96	5.72	2.585	5.34
Vitvi04g01368	0.257	-1.95999	3.37923e-56	4.12764e-53	down	3482.68	3741.65	856.21	1057.17	3612.16	956.69
Vitvi04g01389	0.437	-1.19379	1.7973e-15	1.68112e-13	down	26.04	28.8	10.99	12.52	27.42	11.755
Vitvi04g01441	2.13	1.09064	0.00555714	0.0251568	up	2.96	4.32	7.44	7.88	3.64	7.66
Vitvi04g01576	0.285	-1.81253	7.85482e-40	4.29225e-37	down	47.35	42.48	11.85	13.21	44.915	12.53
Vitvi04g01589	2.171	1.11854	2.42622e-06	3.58835e-05	up	13.35	17.29	28.62	37.56	15.32	33.09
Vitvi04g01596	0.231	-2.1119	2.31975e-10	9.12304e-09	down	36.21	25.47	9.2	5.7	30.84	7.45
Vitvi04g01666	2.416	1.27242	5.65111e-06	7.55655e-05	up	7.48	8.39	19.39	18.69	7.935	19.04
Vitvi04g01669	4.043	2.01557	0.0018091	0.0100176	up	1.54	2.08	9.59	3.1	1.81	6.345
Vitvi04g01670	2.006	1.00404	0.000477725	0.00333332	up	5.81	6.83	14.01	11.81	6.32	12.91
Vitvi04g01671	3.648	1.86692	0.000111028	0.000974013	up	1.38	2.74	8.12	6.74	2.06	7.43
Vitvi04g01701	2.7	1.4328	0.00221987	0.0118346	up	1.9	2.8	8.22	4.14	2.35	6.18
Vitvi04g01706	2.804	1.48763	1.79143e-05	0.000201949	up	2.05	2.78	5.65	7.7	2.415	6.675
Vitvi04g01792	35.289	5.14114	6.5839e-220	1.36715e-215	up	21.57	23.61	839.11	784.76	22.59	811.935
Vitvi04g01794	148.491	7.21424	9.84878e-07	1.64927e-05	up	0.44	0	42	23.22	0.22	32.61
Vitvi04g01795	17.097	4.09565	1.21069e-27	3.69705e-25	up	2.47	2.24	46	31.91	2.355	38.955
Vitvi04g01796	24.701	4.62648	5.54226e-06	7.44887e-05	up	0.34	0.74	15.39	9.4	0.54	12.395
Vitvi04g01797	5.297	2.4051	6.50832e-05	0.000617948	up	1.53	2.09	8.29	11.15	1.81	9.72
Vitvi04g01799	29.779	4.89624	7.05431e-50	5.85931e-47	up	3.32	3.83	125.55	99.8	3.575	112.675
Vitvi04g01800	31.355	4.9706	3.96559e-56	4.57475e-53	up	6.62	3.66	201.95	146.01	5.14	173.98
Vitvi04g01801	71.292	6.15568	1.71422e-42	1.07866e-39	up	0.59	0.65	104.8	68.86	0.62	86.83
Vitvi04g01802	17.553	4.13364	0.000232257	0.00183099	up	0.57	3.52	38.91	31.59	2.045	35.25
Vitvi04g01817	0.457	-1.12882	2.61882e-11	1.2331e-09	down	20.56	20.03	9.66	9.02	20.295	9.34
Vitvi04g01848	2.198	1.13615	0.00566956	0.0255653	up	4.14	4.81	10.69	5.49	4.475	8.09
Vitvi04g01853	0.381	-1.39141	3.3284e-11	1.52907e-09	down	7.09	6.22	2.29	2.56	6.655	2.425
Vitvi04g01889	5.718	2.51542	0.00406304	0.0195743	up	1.93	0.87	11.6	4.68	1.4	8.14
Vitvi04g01934	0.46	-1.12082	2.74388e-18	3.77329e-16	down	55.34	55.87	24.36	25.93	55.605	25.145
Vitvi04g02085	0.349	-1.51932	2.73171e-31	9.61425e-29	down	16.74	17.31	7.41	9.27	17.025	8.34
Vitvi04g02106	0.373	-1.42325	5.39613e-23	1.17948e-20	down	896.35	1096.84	414.05	415.8	996.595	414.925
Vitvi04g02158	3.798	1.92516	0.000473865	0.00331418	up	2.05	1.99	9.21	6.05	2.02	7.63
Vitvi04g02172	0.169	-2.5673	6.55156e-07	1.14998e-05	down	13.88	11.84	1.99	2.33	12.86	2.16
Vitvi04g02184	2.725	1.44599	1.56431e-24	3.77709e-22	up	40.99	44.99	112.25	120.82	42.99	116.535
Vitvi04g02223	2.471	1.30487	0.000102987	0.000914288	up	18.47	21.01	48.59	53.36	19.74	50.975
Vitvi04g02316	3.104	1.63433	1.68522e-18	2.38051e-16	up	36	49.39	119.19	141.83	42.695	130.51
Vitvi04g02319	0.215	-2.22021	0.000126341	0.00108319	down	10.34	7.97	2.15	2.39	9.155	2.27
Vitvi05g00016	2.366	1.24272	0.00504049	0.0232642	up	3.57	4.94	10.4	9.71	4.255	10.055
Vitvi05g00038	0.418	-1.25749	0.000371137	0.00269558	down	7.35	5.83	2.59	2.86	6.59	2.725
Vitvi05g00061	0.41	-1.28603	1.25971e-08	3.35357e-07	down	17.87	20.66	6.8	9.24	19.265	8.02
Vitvi05g00082	0.401	-1.31898	0.00067525	0.0044527	down	10.45	9.03	2.95	4.81	9.74	3.88
Vitvi05g00113	2.151	1.10498	0.00538915	0.0245407	down	3.43	4.89	11.54	5.93	4.16	8.735
Vitvi05g00114	2.181	1.12516	1.8083e-06	2.79886e-05	up	4.73	4.3	9.9	9.39	4.515	9.645
Vitvi05g00182	0.454	-1.13823	3.94054e-09	1.17565e-07	up	9.3	10.19	3.95	4.77	9.745	4.36
Vitvi05g00261	2.563	1.35787	0.000324724	0.00242028	down	1.49	2.68	5.93	4.61	2.085	5.27
Vitvi05g00277	3.019	1.59398	5.30672e-11	2.33462e-09	up	8.49	10.15	30.58	24.76	9.32	27.67
Vitvi05g00312	2.039	1.02788	2.69743e-05	0.000288573	up	11.41	13.79	23.49	27.55	12.6	25.52
Vitvi05g00345	0.432	-1.21109	1.1804e-27	3.65835e-25	up	118.39	115.46	45.57	52.88	116.925	49.225
Vitvi05g00387	0.395	-1.33867	4.37215e-06	6.03052e-05	down	24.04	15.47	8.83	6.49	19.755	7.66
Vitvi05g00389	2.424	1.27738	0.00885027	0.0363863	down	19.86	19.47	21.41	32.57	19.665	26.99
Vitvi05g00462	0.477	-1.06652	4.38476e-17	4.97539e-15	up	182.11	183.88	112.4	98.34	182.995	105.37
Vitvi05g00475	2.009	1.00617	0.000989685	0.0061036	down	66.74	88.83	198.15	109.73	77.785	153.94
Vitvi05g00479	2.836	1.50383	0.00825679	0.034442	up	2.9	0.92	6.36	4.25	1.91	5.305
Vitvi05g00543	2.118	1.08275	8.35286e-12	4.24076e-10	up	30.36	32.87	62.95	70	31.615	66.475
Vitvi05g00544	0.441	-1.18264	0.000234549	0.00184222	up	8.65	8.2	3.75	3.57	8.425	3.66
Vitvi05g00548	0.397	-1.33409	1.86001e-12	1.06693e-10	down	17.5	16.71	7.14	6.74	17.105	6.94
Vitvi05g00551	2.018	1.01273	6.07645e-11	2.6287e-09	down	58.53	60.88	127.04	111.42	59.705	119.23
Vitvi05g00650	0.424	-1.23799	2.59382e-26	7.18143e-24	up	45.9	43.28	17.42	19.27	44.59	18.345
Vitvi05g00681	0.376	-1.41196	9.19501e-12	4.63433e-10	down	20.73	17.19	7.43	6.53	18.96	6.98
Vitvi05g00707	3.177	1.66759	1.22724e-06	2.00186e-05	down	5.75	10.14	28.32	21.24	7.945	24.78
Vitvi05g00711	2.113	1.07927	0.00326462	0.0163231	up	9.17	8.25	21.89	13.9	8.71	17.895
Vitvi05g00715	3.322	1.73186	0.000190837	0.00154613	up	4.45	11.71	31.84	20.54	8.08	26.19
Vitvi05g00726	2.144	1.1004	5.84083e-05	0.000563851	up	12.52	16.15	29.43	32.1	14.335	30.765
Vitvi05g00729	0.486	-1.04222	2.39741e-11	1.13918e-09	up	28.49	26.98	15.54	16.48	27.735	16.01
Vitvi05g00749	3.815	1.93157	0.000674951	0.00445215	down	2.55	4.08	10.32	14.94	3.315	12.63
Vitvi05g00807	2.022	1.01602	1.83487e-07	3.68125e-06	up	24.57	21.92	51.8	39.58	23.245	45.69
Vitvi05g00924	4.078	2.0279	1.15814e-41	6.87108e-39	up	28.9	36.61	129.92	132.07	32.755	130.995
Vitvi05g01226	0.424	-1.23675	0.007296	0.0313019	up	25.75	37.98	13.7	14.47	31.865	14.085
Vitvi05g01269	3.33	1.73566	4.76606e-07	8.6966e-06	down	2.91	3.31	12.09	8.13	3.11	10.11
Vitvi05g01270	4.295	2.10261	0.00052465	0.00360144	up	9.73	20.35	71.03	54.08	15.04	62.555
Vitvi05g01298	2.367	1.24287	4.46831e-05	0.000448075	up	3.35	3.98	8.11	9.23	3.665	8.67
Vitvi05g01300	2.205	1.141	1.37861e-07	2.84845e-06	up	19.93	26.9	55.24	46.2	23.415	50.72
Vitvi05g01334	3.773	1.91573	0.000377638	0.00272753	up	67.14	151.02	379.25	432.89	109.08	406.07
Vitvi05g01337	2.021	1.01539	0.00125148	0.00741429	up	6	4.62	10	9.9	5.31	9.95
Vitvi05g01493	0.494	-1.01765	1.30377e-07	2.72179e-06	up	8.86	7.71	3.73	4.28	8.285	4.005
Vitvi05g01545	2.142	1.09921	1.07609e-08	2.89818e-07	down	17.23	14	31.33	34.59	15.615	32.96
Vitvi05g01581	5.232	2.3874	0.000457497	0.00322032	up	0.9	1.92	10.35	4.09	1.41	7.22
Vitvi05g01672	2.746	1.45756	0.00560527	0.0253194	up	1.94	5.01	11.34	7.35	3.475	9.345
Vitvi05g01685	416.417	8.70189	1.35432e-07	2.80945e-06	up	0	0	1.67	5.31	0	3.49
Vitvi05g01687	2.001	1.00062	3.65711e-05	0.000378376	up	7.23	7.63	12.75	15.83	7.43	14.29
Vitvi05g01722	6.112	2.61161	0.00938999	0.0380084	up	0.83	3.59	9.5	18.43	2.21	13.965
Vitvi05g01752	3.215	1.68498	3.80704e-06	5.3947e-05	up	20.92	22.47	49.54	93.88	21.695	71.71
Vitvi05g01776	2.02	1.01425	1.12264e-08	3.01573e-07	up	126.85	171.04	313.52	284.53	148.945	299.025
Vitvi05g01798	2.471	1.3052	1.24185e-05	0.000147102	up	19.69	31.7	65.23	63.75	25.695	64.49
Vitvi05g01824	0.386	-1.37214	2.41423e-07	4.65905e-06	up	19.97	28	7.83	10.19	23.985	9.01
Vitvi05g01918	2.067	1.04728	4.23442e-05	0.000428916	up	17.51	19.93	43.28	33.51	18.72	38.395
Vitvi05g01928	2.028	1.02028	1.67348e-16	1.82893e-14	down	46.18	45.5	89.24	87.87	45.84	88.555
Vitvi05g01929	2.207	1.14224	7.20167e-12	3.71074e-10	up	109.05	141.71	288.93	259.97	125.38	274.45
Vitvi05g01930	2.789	1.47954	9.63817e-16	9.48515e-14	up	20.19	24.77	65.11	58.37	22.48	61.74
Vitvi05g01931	0.239	-2.06281	8.52707e-05	0.000779334	up	243.96	121.71	36.75	51.5	182.835	44.125
Vitvi05g01933	2.169	1.11698	4.2769e-06	5.93742e-05	up	77.9	123.33	187.1	249.53	100.615	218.315
Vitvi05g01937	2.348	1.23149	6.11734e-11	2.64088e-09	down	68.72	90.14	180.57	202.66	79.43	191.615
Vitvi05g01938	3.267	1.70805	1.00973e-09	3.40376e-08	up	24.15	43.93	100.64	122.89	34.04	111.765
Vitvi05g01939	3.468	1.79425	0.00182185	0.010064	up	3.04	2.52	10.52	9.17	2.78	9.845
Vitvi05g01941	2.582	1.36858	6.32443e-09	1.81893e-07	up	18.73	25.91	55.08	60.35	22.32	57.715
Vitvi05g01943	5.819	2.54079	0.00906752	0.037028	up	26.59	126.86	402.3	484.83	76.725	443.565
Vitvi05g01944	6.05	2.59704	0.0123871	0.0473786	up	15.54	80.35	258.39	321.68	47.945	290.035
Vitvi05g01959	4.559	2.18872	9.15515e-09	2.52466e-07	up	9.95	24.7	74.08	82.46	17.325	78.27
Vitvi05g01961	2.422	1.27635	4.84758e-08	1.12595e-06	up	14.52	19.43	39.79	42.89	16.975	41.34
Vitvi05g01962	4.639	2.21376	7.36586e-16	7.31828e-14	up	5.95	8.49	30.85	30.71	7.22	30.78
Vitvi05g01963	2.029	1.02055	0.00295605	0.0150521	up	6.41	10.12	17.74	15.49	8.265	16.615
Vitvi05g02059	0.49	-1.02959	0.00592177	0.0264955	up	8.99	8.41	2.5	2.96	8.7	2.73
Vitvi05g02082	0.467	-1.09808	3.55154e-05	0.000368923	up	16.25	12.45	5.17	6.22	14.35	5.695
Vitvi05g02108	0.438	-1.19197	0.00395945	0.0191427	down	30.25	18.76	13.86	7.44	24.505	10.65
Vitvi05g02124	2.366	1.24237	0.00255148	0.0133589	down	6.14	7.91	13.2	20.69	7.025	16.945
Vitvi05g02180	2.041	1.02961	0.00499743	0.023122	down	3.21	3.72	7.05	4.88	3.465	5.965
Vitvi05g02185	7.121	2.83199	1.18396e-47	9.10553e-45	up	17.33	20.41	142.91	124.85	18.87	133.88
Vitvi05g02186	6.766	2.75824	4.48834e-37	2.27318e-34	up	8.23	11.01	68.8	59.52	9.62	64.16
Vitvi05g02187	7.834	2.96983	1.84146e-37	9.55946e-35	up	12.09	18.15	123.51	112.3	15.12	117.905
Vitvi05g02233	2.812	1.49184	0.000756293	0.00489814	up	1.7	3.69	8.64	6.15	2.695	7.395
Vitvi05g02250	5.494	2.45788	2.93831e-06	4.27569e-05	up	3.66	2.49	29.14	12.31	3.075	20.725
Vitvi05g02284	0.423	-1.24208	0.00268587	0.0139395	up	5.53	5.52	2.24	2.57	5.525	2.405
Vitvi06g00032	2.138	1.09646	2.99508e-22	6.21929e-20	up	70.15	72.37	153.09	145.02	71.26	149.055
Vitvi06g00073	2.821	1.49645	5.27044e-30	1.71001e-27	down	39.32	42.02	140.54	131.83	40.67	136.185
Vitvi06g00111	2.792	1.48123	5.63326e-13	3.49178e-11	up	125.8	194.96	437.01	446.53	160.38	441.77
Vitvi06g00175	2.123	1.08619	0.00435102	0.0206476	up	9.16	7.65	15.25	20.8	8.405	18.025
Vitvi06g00178	2.418	1.27394	5.82223e-07	1.03687e-05	up	31.24	39.9	70.68	102.88	35.57	86.78
Vitvi06g00230	2.074	1.05259	5.70323e-13	3.52463e-11	up	38.43	45.24	77.49	92.88	41.835	85.185
Vitvi06g00254	0.411	-1.28226	1.41813e-14	1.14135e-12	up	5.41	5.57	2.09	2.32	5.49	2.205
Vitvi06g00259	0.352	-1.50468	3.96452e-14	2.96127e-12	up	31.3	26.67	8.77	11.64	28.985	10.205
Vitvi06g00271	2.913	1.54251	0.000434542	0.00307751	down	1.45	3.1	6.02	5.27	2.275	5.645
Vitvi06g00303	0.402	-1.31486	3.87398e-05	0.000398431	down	44.7	27.89	11.91	17.13	36.295	14.52
Vitvi06g00344	2.22	1.15059	5.50155e-12	2.88484e-10	up	62.02	74.47	131.28	149.42	68.245	140.35
Vitvi06g00358	2.528	1.33785	4.88192e-49	3.89897e-46	down	634.05	686.17	1630.19	1687.45	660.11	1658.82
Vitvi06g00412	3.487	1.80199	5.71126e-10	2.05536e-08	up	9.93	9.39	25.64	41.36	9.66	33.5
Vitvi06g00432	2.101	1.07124	0.00553109	0.0250607	up	3.19	2.31	5.97	6.2	2.75	6.085
Vitvi06g00443	8.438	3.07687	3.123e-152	1.62123e-148	up	52.17	55.58	462.79	428.54	53.875	445.665
Vitvi06g00455	3.516	1.81382	0.000245148	0.00190985	down	3.62	4.84	20.59	7.92	4.23	14.255
Vitvi06g00544	0.482	-1.05304	0.00223621	0.0119064	up	5.73	4.69	3.53	2.78	5.21	3.155
Vitvi06g00555	0.29	-1.78394	1.07711e-07	2.29868e-06	up	5.7	10.36	2.21	2.36	8.03	2.285
Vitvi06g00569	2.3	1.20138	8.39251e-08	1.8383e-06	up	21.34	23.92	41.33	61.59	22.63	51.46
Vitvi06g00645	366.83	8.51897	8.94786e-08	1.94151e-06	down	0	0	3.34	2	0	2.67
Vitvi06g00666	0.447	-1.16056	1.46179e-17	1.76477e-15	down	2574.73	2143.76	1024.47	1043.94	2359.24	1034.2
Vitvi06g00700	2	1.00015	0.00999998	0.0399864	up	10.52	20.13	33.03	28.21	15.325	30.62
Vitvi06g00709	2.12	1.0844	0.000571744	0.00385589	up	4.87	5.55	12.54	9.14	5.21	10.84
Vitvi06g00712	2.67	1.41664	0.000555906	0.00376989	down	7.86	19.74	38.13	36.61	13.8	37.37
Vitvi06g00713	3.494	1.80489	6.99148e-07	1.21386e-05	up	5.25	10.04	28.16	24.61	7.645	26.385
Vitvi06g00790	3.758	1.9098	5.51992e-05	0.000536867	up	2.46	2.88	8.1	11.97	2.67	10.035
Vitvi06g00811	2.096	1.06776	8.58084e-10	2.94469e-08	up	156.21	144.37	340.57	309.68	150.29	325.125
Vitvi06g00832	0.493	-1.019	0.00181713	0.0100486	up	15.9	12.69	6.22	8.04	14.295	7.13
Vitvi06g00903	2.59	1.37268	3.30423e-05	0.000344959	up	3.78	4.91	8.31	13.88	4.345	11.095
Vitvi06g00915	2.395	1.2599	0.00993738	0.0397898	up	3.68	7.66	17.99	8.45	5.67	13.22
Vitvi06g00918	0.49	-1.02781	1.457e-20	2.54241e-18	down	210.48	197.63	93.46	105.53	204.055	99.495
Vitvi06g01092	0.456	-1.13338	1.41014e-06	2.25764e-05	up	26.72	23.66	12.07	10.57	25.19	11.32
Vitvi06g01251	0.336	-1.5754	0.00306631	0.0155146	up	8.4	3.91	1.49	2.59	6.155	2.04
Vitvi06g01280	2.54	1.34464	2.65969e-07	5.08599e-06	down	44.48	30.52	75.06	114.2	37.5	94.63
Vitvi06g01289	0.486	-1.04104	9.32206e-16	9.21774e-14	down	76.21	69.33	36.56	39.21	72.77	37.885
Vitvi06g01290	0.438	-1.19143	0.00124828	0.00740162	down	3.65	3.22	1.42	1.6	3.435	1.51
Vitvi06g01293	0.449	-1.15463	7.8686e-06	9.99809e-05	up	11.87	14.96	5.29	7.57	13.415	6.43
Vitvi06g01295	2.147	1.10234	6.73601e-32	2.49774e-29	down	109.66	115.05	232.01	245.57	112.355	238.79
Vitvi06g01302	0.498	-1.00596	0.000143182	0.00120861	down	10.92	11.64	8.35	7.86	11.28	8.105
Vitvi06g01353	6.097	2.60803	0.000809542	0.00517076	down	0.5	1.13	7.58	2.08	0.815	4.83
Vitvi06g01387	2.46	1.29861	3.29438e-05	0.000344103	up	4.38	5.32	10.04	13.55	4.85	11.795
Vitvi06g01456	2.793	1.482	3.52027e-08	8.51962e-07	down	7.5	10.08	20.07	28.4	8.79	24.235
Vitvi06g01459	4.637	2.21321	5.50157e-07	9.86529e-06	up	1.41	3.4	8.34	13.44	2.405	10.89
Vitvi06g01531	2.003	1.00211	2.03235e-06	3.07145e-05	up	67.81	51.7	110.17	130.16	59.755	120.165
Vitvi06g01562	2.16	1.11075	6.00116e-20	9.66e-18	up	128.58	132.1	289.85	263.03	130.34	276.44
Vitvi06g01594	2.062	1.04386	2.58962e-05	0.000278763	up	9.59	12.18	24.25	19.84	10.885	22.045
Vitvi06g01599	3.096	1.63053	1.39658e-08	3.68021e-07	up	53.6	106.2	249.52	240.97	79.9	245.245
Vitvi06g01649	4.078	2.02781	0.000378713	0.00273434	up	5.29	2.43	9.68	22.05	3.86	15.865
Vitvi06g01669	5.726	2.51762	6.90401e-18	8.7952e-16	up	17.78	28.96	161.34	109	23.37	135.17
Vitvi06g01727	7.499	2.90666	0.0102165	0.0406578	up	2.91	18.82	76.25	83.74	10.865	79.995
Vitvi06g01732	2.175	1.12098	1.05195e-05	0.000127667	up	19.48	24.39	45.42	53.27	21.935	49.345
Vitvi06g01759	2.087	1.06135	1.63177e-06	2.56695e-05	up	22.62	18.93	45.41	40.57	20.775	42.99
Vitvi06g01763	3.279	1.71343	0.000452519	0.00318851	up	2.59	5.41	16.77	8.84	4	12.805
Vitvi06g01782	2.872	1.52194	0.000215431	0.00171396	up	123.52	197.84	532.93	391.88	160.68	462.405
Vitvi06g01858	0.291	-1.77885	8.40907e-10	2.89296e-08	up	9.77	12.01	2.87	3.38	10.89	3.125
Vitvi06g01888	2.316	1.21149	0.00461157	0.0216846	up	1.53	1.29	3.17	3.16	1.41	3.165
Vitvi06g01896	3.569	1.8354	2.99242e-05	0.00031574	up	2.11	3.11	11.31	7.66	2.61	9.485
Vitvi06g01917	2.282	1.19029	1.23732e-10	5.06764e-09	down	14.3	16.11	31.97	36.57	15.205	34.27
Vitvi06g01942	0.494	-1.01826	9.27975e-06	0.000114962	up	8.63	7.58	4.19	4.18	8.105	4.185
Vitvi06g01949	0.453	-1.14298	9.75878e-09	2.6753e-07	up	12.08	9.61	4.77	5.04	10.845	4.905
Vitvi07g00011	2.178	1.12307	0.000382222	0.0027568	up	6.49	9.13	19.32	14.06	7.81	16.69
Vitvi07g00068	4.367	2.12656	0.00127321	0.00752584	down	4.4	8.05	48.99	15.65	6.225	32.32
Vitvi07g00078	8.283	3.0501	9.23108e-77	2.12982e-73	down	6.17	5.01	45.6	48.13	5.59	46.865
Vitvi07g00091	0.296	-1.75572	6.67793e-36	3.15153e-33	up	57.81	54.57	14.99	17.74	56.19	16.365
Vitvi07g00119	2.088	1.0623	1.37195e-20	2.41429e-18	up	193.54	222.12	424.71	441.16	207.83	432.935
Vitvi07g00121	2.082	1.05811	1.81143e-14	1.42159e-12	up	89.93	104.9	196.01	203.41	97.415	199.71
Vitvi07g00135	0.308	-1.69781	2.70015e-33	1.12137e-30	down	38.47	37.93	10.79	12.2	38.2	11.495
Vitvi07g00214	0.476	-1.0712	3.1707e-16	3.30852e-14	up	86.77	79.39	36.95	39.73	83.08	38.34
Vitvi07g00219	2.558	1.35496	1.3645e-13	9.17628e-12	up	42.71	53.5	124.78	123.01	48.105	123.895
Vitvi07g00285	2.396	1.26058	9.71049e-21	1.75338e-18	down	40.05	40.4	93.52	97.73	40.225	95.625
Vitvi07g00286	3.939	1.97775	1.04935e-52	1.03761e-49	down	63.26	75.23	292.58	286.22	69.245	289.4
Vitvi07g00301	0.342	-1.54886	7.63096e-06	9.74519e-05	up	35.65	20.18	8.78	10.18	27.915	9.48
Vitvi07g00311	2.208	1.14288	5.34516e-19	7.76169e-17	up	45.11	50.87	109.97	100.41	47.99	105.19
Vitvi07g00317	0.37	-1.43358	1.28524e-06	2.08501e-05	up	34.72	27.11	13.05	9.58	30.915	11.315
Vitvi07g00352	2.237	1.16178	4.28552e-05	0.000432404	down	5.65	7.19	11.37	16.95	6.42	14.16
Vitvi07g00357	3.722	1.89613	0.00086925	0.00548132	up	23.37	45.7	153.48	97.89	34.535	125.685
Vitvi07g00381	2.299	1.201	5.09056e-05	0.000500499	down	2.89	3.45	7.27	7.07	3.17	7.17
Vitvi07g00394	2.213	1.14597	2.08903e-12	1.1915e-10	up	55.38	48.86	121.75	105.07	52.12	113.41
Vitvi07g00439	0.445	-1.16786	0.00421633	0.0201594	up	6.46	5.3	2.37	2.82	5.88	2.595
Vitvi07g00457	2.217	1.14884	5.9103e-08	1.34717e-06	up	17.85	15.07	38.9	32.92	16.46	35.91
Vitvi07g00502	0.206	-2.28151	0.00170202	0.00954942	up	5.02	6.12	0.88	1.42	5.57	1.15
Vitvi07g00652	2.056	1.03965	2.30319e-09	7.30165e-08	down	34.51	43.03	87.74	89.21	38.77	88.475
Vitvi07g00665	0.339	-1.56256	3.86328e-06	5.46093e-05	up	26.09	14.36	5.26	8.23	20.225	6.745
Vitvi07g00736	2.158	1.10962	3.17844e-09	9.77781e-08	down	16.87	18	37.99	36.54	17.435	37.265
Vitvi07g00914	3.517	1.81441	1.87165e-19	2.8577e-17	up	25.78	30.1	109.24	84.28	27.94	96.76
Vitvi07g01093	0.183	-2.45269	0.000511961	0.00352834	down	5.51	4.75	0.68	1.02	5.13	0.85
Vitvi07g01097	0.347	-1.52535	2.56228e-29	8.18551e-27	up	15.58	16.78	6.37	6.47	16.18	6.42
Vitvi07g01133	2.518	1.33232	0.00346002	0.0170862	up	4.16	3.62	12.12	7.23	3.89	9.675
Vitvi07g01222	0.43	-1.21815	1.3741e-14	1.11458e-12	down	13.1	12.74	6.03	5.29	12.92	5.66
Vitvi07g01298	3.316	1.72955	1.68775e-08	4.35355e-07	down	8.9	11.58	29.87	38.4	10.24	34.135
Vitvi07g01345	0.305	-1.71189	3.62119e-18	4.78942e-16	up	12.96	13.73	3.58	4.4	13.345	3.99
Vitvi07g01375	2.018	1.01262	4.3141e-06	5.97215e-05	down	5.66	5.33	12.48	11.58	5.495	12.03
Vitvi07g01407	0.13	-2.94057	1.77992e-11	8.63551e-10	up	8.53	7.04	0.67	1.33	7.785	1
Vitvi07g01443	0.458	-1.12793	0.00156322	0.00890548	down	7.62	10.03	3.19	4.94	8.825	4.065
Vitvi07g01524	2.196	1.13496	6.00659e-10	2.13208e-08	up	28.63	38.37	75.15	69	33.5	72.075
Vitvi07g01543	2.027	1.01966	0.00470715	0.0220691	down	16.22	10.17	24.62	29.42	13.195	27.02
Vitvi07g01575	0.487	-1.03927	0.000637523	0.00424277	down	4.7	5.14	2.05	2.65	4.92	2.35
Vitvi07g01651	0.451	-1.14982	4.00671e-05	0.000409446	up	9.69	9.01	3.48	4.84	9.35	4.16
Vitvi07g01653	2.922	1.54677	1.08977e-11	5.40072e-10	up	7.45	10.61	25.86	25.97	9.03	25.915
Vitvi07g01655	8.416	3.0731	0.00058866	0.00395711	down	0.37	3.26	18.94	10.84	1.815	14.89
Vitvi07g01761	2.484	1.31277	0.000562207	0.00380509	down	3.28	5.51	8.83	12.76	4.395	10.795
Vitvi07g01832	2.727	1.44722	3.20444e-20	5.32321e-18	up	26.59	29.54	67.22	83.57	28.065	75.395
Vitvi07g01847	2.311	1.20837	1.3106e-05	0.000154278	up	10.99	10.84	27.96	22.07	10.915	25.015
Vitvi07g01973	0.33	-1.59885	5.37284e-06	7.25403e-05	up	10.17	6.58	2.16	3.29	8.375	2.725
Vitvi07g02049	0.481	-1.05539	1.16673e-15	1.12684e-13	up	103.08	91.23	44.83	44.54	97.155	44.685
Vitvi07g02058	0.376	-1.41083	0.00357181	0.0175215	up	5.81	5.44	2.05	2.15	5.625	2.1
Vitvi07g02065	2.604	1.3808	0.00319073	0.0160037	down	5.29	9.09	24.5	12.09	7.19	18.295
Vitvi07g02066	2.516	1.33099	0.00245161	0.0129109	down	6.33	13.11	29.57	18.57	9.72	24.07
Vitvi07g02067	3.256	1.70316	2.73806e-05	0.000292618	down	3.66	8.36	18.71	19.96	6.01	19.335
Vitvi07g02084	0.449	-1.15551	0.00398446	0.0192368	up	3.04	2.82	1.56	1.03	2.93	1.295
Vitvi07g02231	0.484	-1.04794	0.00717412	0.0308875	up	5.17	4.59	1.92	2.79	4.88	2.355
Vitvi07g02241	0.313	-1.67367	3.97763e-08	9.45029e-07	up	44.74	49.66	11.21	18.6	47.2	14.905
Vitvi07g02243	2.511	1.32816	0.000340134	0.00250813	down	12.26	13.97	37.96	29.32	13.115	33.64
Vitvi07g02339	3.645	1.86574	0.000690997	0.00454212	down	1.99	1.93	5.57	5.9	1.96	5.735
Vitvi07g02425	0.435	-1.20075	0.00244581	0.0128869	down	4.11	5.15	1.44	2.56	4.63	2
Vitvi07g02433	26.248	4.71411	3.97045e-51	3.58463e-48	up	9.09	5.7	196.21	231.43	7.395	213.82
Vitvi07g02489	0.397	-1.33153	2.38427e-08	6.00114e-07	up	18.91	19.06	11.77	16.04	18.985	13.905
Vitvi07g02494	0.191	-2.38974	4.61112e-11	2.05914e-09	down	6.58	8.29	1.18	1.59	7.435	1.385
Vitvi07g02513	2.039	1.02751	0.000374846	0.00271682	up	13.31	12.58	30.35	21.87	12.945	26.11
Vitvi07g02519	0.277	-1.85039	0.00634871	0.0280074	down	5.24	4.83	1.56	1.32	5.035	1.44
Vitvi07g02611	2.555	1.35322	5.86812e-24	1.38468e-21	down	114.79	116.56	307.5	283.47	115.675	295.485
Vitvi07g02681	3.808	1.92916	0.0105241	0.0415486	up	1.32	4.16	12.77	8.12	2.74	10.445
Vitvi07g02691	2.007	1.0052	9.31758e-07	1.57428e-05	down	63.52	72.83	143.03	132.58	68.175	137.805
Vitvi07g02715	0.225	-2.14883	0.00262116	0.0136789	up	4.23	6.65	1.25	1.21	5.44	1.23
Vitvi07g02726	0.453	-1.14347	0.013003	0.0491727	up	6.01	5.36	2.12	3	5.685	2.56
Vitvi07g02737	0.207	-2.27215	0.00523325	0.0239727	up	2.76	5.76	0.71	1.03	4.26	0.87
Vitvi07g02801	0.413	-1.27752	1.70048e-07	3.44828e-06	down	9.53	10.11	3.55	4.93	9.82	4.24
Vitvi07g02814	0.387	-1.36966	0.00052851	0.00361956	down	7.67	10.55	4.62	4.79	9.11	4.705
Vitvi07g02922	0.328	-1.60881	2.33523e-05	0.000255619	down	1.96	2.67	0.86	0.68	2.315	0.77
Vitvi07g02933	0.37	-1.43526	3.79713e-05	0.000391302	down	5.41	5.33	1.43	2.49	5.37	1.96
Vitvi07g02941	2.149	1.1035	1.44882e-09	4.76025e-08	down	32.84	29.5	67.43	66.16	31.17	66.795
Vitvi07g02944	2.121	1.08491	2.66988e-05	0.000286216	down	12.26	16.63	29.01	31.93	14.445	30.47
Vitvi07g02958	0.451	-1.14795	4.23374e-07	7.81455e-06	down	17.96	20.25	9.32	7.6	19.105	8.46
Vitvi07g03044	0.474	-1.07655	0.000167355	0.00138286	up	21.49	20.12	7.51	12.01	20.805	9.76
Vitvi07g03060	0.396	-1.33592	2.03133e-07	4.03256e-06	up	178.78	125.99	65.32	57.4	152.385	61.36
Vitvi07g03083	7.688	2.94261	6.59071e-25	1.62924e-22	down	7.47	13.94	76.31	86.05	10.705	81.18
Vitvi07g03084	4.12	2.04281	0.000308532	0.00231706	down	16.89	65.79	135.28	135.77	41.34	135.525
Vitvi07g03157	0.321	-1.63854	0.00475327	0.0222101	down	1.84	22.33	0.57	0.88	12.085	0.725
Vitvi07g03177	0.393	-1.34879	8.22379e-09	2.29835e-07	up	214.98	213.63	99.22	77.84	214.305	88.53
Vitvi07g03190	0.421	-1.24879	0.000945092	0.00587746	up	7.49	7.5	3.96	1.48	7.495	2.72
Vitvi08g00084	0.282	-1.82709	6.56484e-06	8.55508e-05	down	4.29	3.91	1.13	1.54	4.1	1.335
Vitvi08g00115	0.446	-1.16544	7.81278e-10	2.70387e-08	down	18.5	15.31	7	8.01	16.905	7.505
Vitvi08g00117	3.723	1.89656	5.03506e-11	2.22927e-09	down	6.58	6	22.98	23.73	6.29	23.355
Vitvi08g00126	0.418	-1.25954	3.30614e-10	1.26898e-08	down	7.56	7.65	2.93	3.29	7.605	3.11
Vitvi08g00171	2.323	1.21569	4.4546e-05	0.000447508	up	15.61	30.47	50.81	54.16	23.04	52.485
Vitvi08g00175	3.365	1.75042	4.45969e-10	1.64778e-08	down	13.86	24.75	65.12	62.71	19.305	63.915
Vitvi08g00202	2.878	1.52517	0.00607029	0.0270025	up	1.18	1.26	3.59	3.34	1.22	3.465
Vitvi08g00214	2.951	1.56132	0.000330951	0.00245173	down	3.02	2.24	7.71	7.7	2.63	7.705
Vitvi08g00219	0.476	-1.07115	0.00029473	0.00222791	down	18.98	13.25	8.23	6.88	16.115	7.555
Vitvi08g00223	0.336	-1.57516	2.39233e-24	5.70998e-22	up	24.24	22.63	9.17	8.47	23.435	8.82
Vitvi08g00673	0.365	-1.45487	0.00766005	0.0324681	up	6.24	3.13	1.43	1.94	4.685	1.685
Vitvi08g00689	2.238	1.16236	9.83062e-06	0.000120574	up	4.68	6.08	12.18	11.35	5.38	11.765
Vitvi08g00805	0.465	-1.10612	2.50657e-15	2.2929e-13	up	23.6	26.98	12.11	13.53	25.29	12.82
Vitvi08g00816	0.358	-1.48103	0.000711135	0.00464654	down	16.94	11.28	2.97	7.07	14.11	5.02
Vitvi08g00822	0.444	-1.17176	0.010306	0.0409188	down	9.94	5.37	3.16	3.58	7.655	3.37
Vitvi08g00892	0.373	-1.42365	5.9307e-14	4.35163e-12	down	11.43	9.83	3.76	3.89	10.63	3.825
Vitvi08g00957	2.911	1.5414	0.00728748	0.0312767	up	2.74	2.91	11.04	5.17	2.825	8.105
Vitvi08g00958	2.272	1.18389	0.000899048	0.00564522	down	4.04	5.99	9.04	13.5	5.015	11.27
Vitvi08g01006	2.167	1.11537	0.00227892	0.012112	down	2.77	3.05	7.54	4.78	2.91	6.16
Vitvi08g01030	0.439	-1.18663	6.15979e-06	8.12115e-05	down	44.28	35.29	15.64	21.09	39.785	18.365
Vitvi08g01036	0.497	-1.00837	2.29769e-06	3.42018e-05	down	163.39	137.46	77.67	76.32	150.425	76.995
Vitvi08g01037	2.165	1.1143	3.49327e-15	3.04781e-13	up	129.83	162.23	307.36	321.72	146.03	314.54
Vitvi08g01081	0.478	-1.06422	6.07413e-23	1.31385e-20	up	193.71	205.49	94.08	94.27	199.6	94.175
Vitvi08g01129	2.203	1.13934	2.49769e-07	4.80673e-06	up	41.07	62.16	117.24	103.56	51.615	110.4
Vitvi08g01139	0.464	-1.108	5.15572e-07	9.30943e-06	down	29.12	28.15	12.35	14.33	28.635	13.34
Vitvi08g01197	2.845	1.50844	0.00125564	0.00743288	down	0.78	1.32	2.48	3.38	1.05	2.93
Vitvi08g01234	2.659	1.41103	1.7768e-19	2.73298e-17	up	35.35	34.1	97.33	83.54	34.725	90.435
Vitvi08g01301	0.439	-1.1871	1.2445e-07	2.60768e-06	down	35.29	27.92	13.31	14.64	31.605	13.975
Vitvi08g01307	3.439	1.78218	0.000478923	0.00333944	up	40.06	74.98	227.88	161.15	57.52	194.515
Vitvi08g01329	0.305	-1.71089	3.98645e-09	1.18764e-07	down	5.8	7.3	2.03	2.03	6.55	2.03
Vitvi08g01335	0.415	-1.27014	0.00226375	0.0120437	up	15.47	7.94	3.56	6.04	11.705	4.8
Vitvi08g01337	2.295	1.1987	5.65047e-07	1.00974e-05	up	4.88	4.48	11.12	9.93	4.68	10.525
Vitvi08g01357	2.064	1.04526	4.46659e-07	8.19335e-06	down	6.35	7.42	13.62	14.39	6.885	14.005
Vitvi08g01397	2.223	1.15249	2.3953e-05	0.000260586	up	11.83	14.36	28.05	30.3	13.095	29.175
Vitvi08g01401	3.825	1.93548	0.00842955	0.0350079	down	1.67	3.94	21.88	4.53	2.805	13.205
Vitvi08g01450	0.499	-1.00154	5.46604e-08	1.25714e-06	down	29.32	23.99	12.42	13.09	26.655	12.755
Vitvi08g01510	2.103	1.07225	4.56063e-18	5.91884e-16	up	127.49	133.55	260.43	286.61	130.52	273.52
Vitvi08g01513	3.379	1.75661	0.000634392	0.00422894	up	0.8	2.18	5.87	3.92	1.49	4.895
Vitvi08g01543	2.463	1.3004	0.00575198	0.025864	up	2.38	3.41	6.02	6.71	2.895	6.365
Vitvi08g01547	0.444	-1.17174	0.00116296	0.00697542	up	6.39	5.75	2.35	3.11	6.07	2.73
Vitvi08g01583	0.455	-1.13595	9.696e-25	2.36867e-22	down	34.4	33.24	14.95	15.12	33.82	15.035
Vitvi08g01606	2.256	1.17381	2.4031e-05	0.000261258	up	6.47	7.55	13.07	18.88	7.01	15.975
Vitvi08g01611	0.455	-1.13529	0.00224908	0.0119718	up	4.21	3.7	1.78	1.76	3.955	1.77
Vitvi08g01614	2.088	1.06203	2.44836e-08	6.14754e-07	up	10.85	12.85	23.16	25.56	11.85	24.36
Vitvi08g01642	0.324	-1.62428	9.78505e-11	4.0965e-09	down	6.43	7.68	2.21	2.28	7.055	2.245
Vitvi08g01669	4.092	2.03266	3.2285e-06	4.66526e-05	down	5.24	14.4	39.15	40.52	9.82	39.835
Vitvi08g01670	2.302	1.20273	1.02645e-05	0.000125304	up	16.73	17.33	46.17	31.07	17.03	38.62
Vitvi08g01702	2.362	1.24015	1.45161e-05	0.0001683	down	46.21	21.65	92.22	72.98	33.93	82.6
Vitvi08g01736	3.23	1.69174	0.00132062	0.00777286	up	2.55	4.08	11.22	10.36	3.315	10.79
Vitvi08g01738	2.632	1.39612	0.0119413	0.0459784	down	3.31	3.77	6.59	12.21	3.54	9.4
Vitvi08g01741	2.02	1.01404	4.06826e-05	0.000414308	up	11.68	8.81	19.98	20.61	10.245	20.295
Vitvi08g01757	2.757	1.46306	9.65796e-37	4.77494e-34	up	24.78	25.27	68.75	65.95	25.025	67.35
Vitvi08g01822	2.628	1.39421	0.00318788	0.0159933	up	0.81	1.47	2.72	3.27	1.14	2.995
Vitvi08g01826	3.378	1.75615	1.58775e-20	2.74747e-18	up	45.23	64.58	172.52	209.11	54.905	190.815
Vitvi08g01931	2.811	1.49088	3.15769e-08	7.72313e-07	up	17.14	19.91	61.85	40.39	18.525	51.12
Vitvi08g01959	0.482	-1.05158	2.71217e-14	2.07816e-12	up	14.53	15.3	7.29	7.07	14.915	7.18
Vitvi08g01962	2.637	1.39907	0.00514533	0.0236741	up	1.91	0.88	3.7	3.54	1.395	3.62
Vitvi08g02021	0.373	-1.42265	1.30123e-09	4.30941e-08	down	7.57	6.95	2.8	3.37	7.26	3.085
Vitvi08g02159	0.104	-3.26879	6.56512e-06	8.55508e-05	up	4.93	1.93	0.28	0.42	3.43	0.35
Vitvi08g02170	0.457	-1.12957	0.00112176	0.00678115	up	123.46	111.47	31.35	67.48	117.465	49.415
Vitvi08g02188	0.451	-1.14989	4.2022e-08	9.90451e-07	up	15.14	14.53	6.53	9.08	14.835	7.805
Vitvi08g02189	4.587	2.19759	8.74677e-56	9.5593e-53	down	83.58	91.36	422.19	363.39	87.47	392.79
Vitvi08g02226	2.594	1.37508	1.87459e-11	9.03154e-10	up	175.07	266.83	587.91	554.16	220.95	571.035
Vitvi08g02227	2.296	1.19888	2.20218e-07	4.30993e-06	down	99.45	165.73	307.71	292.5	132.59	300.105
Vitvi08g02233	2.3	1.20162	1.94911e-06	2.9716e-05	down	4.17	4.2	9.6	9.33	4.185	9.465
Vitvi08g02253	3.049	1.60835	0.000109779	0.000964551	down	2.8	4.79	10.91	12.14	3.795	11.525
Vitvi08g02300	0.499	-1.00256	0.000958283	0.00594702	down	7.13	7.12	3.04	4.09	7.125	3.565
Vitvi08g02317	2.093	1.06563	3.87917e-05	0.000398767	up	10.44	8.79	20.15	19.72	9.615	19.935
Vitvi08g02329	3.104	1.63403	0.00707729	0.0305968	up	3.02	8.98	24.66	11.89	6	18.275
Vitvi08g02385	2.147	1.10202	0.00452169	0.0213151	up	16.01	22.45	33.12	52.05	19.23	42.585
Vitvi08g02391	2.146	1.10158	1.58742e-07	3.23799e-06	up	30.94	37.05	74.8	72.5	33.995	73.65
Vitvi09g00012	2.214	1.14685	0.000212651	0.00169639	up	10.64	18.94	35.93	28.16	14.79	32.045
Vitvi09g00013	3.637	1.8629	5.49799e-05	0.000535487	down	1.07	2.07	5.91	4.33	1.57	5.12
Vitvi09g00045	7.185	2.84494	3.41289e-36	1.64811e-33	up	35.93	47.54	342.55	260.81	41.735	301.68
Vitvi09g00049	4.62	2.20803	3.34887e-51	3.16088e-48	up	36.74	38.21	181.82	158.44	37.475	170.13
Vitvi09g00137	2.097	1.06815	8.8932e-14	6.2812e-12	up	19.59	19.14	39.18	40.69	19.365	39.935
Vitvi09g00225	0.43	-1.2189	1.84246e-14	1.43829e-12	up	30.67	25.99	11.54	12.85	28.33	12.195
Vitvi09g00244	0.409	-1.28968	8.44907e-22	1.6709e-19	up	19.88	19.29	7.47	8.87	19.585	8.17
Vitvi09g00323	0.366	-1.45094	2.2113e-07	4.3237e-06	up	20.77	20.78	5.91	9.14	20.775	7.525
Vitvi09g00329	2.189	1.13008	3.85734e-32	1.48329e-29	up	351.35	369.93	783.16	794.56	360.64	788.86
Vitvi09g00375	2.667	1.41518	1.52166e-14	1.21528e-12	up	16.19	14.86	42.78	38.81	15.525	40.795
Vitvi09g00383	2.213	1.1457	0.000377565	0.00272753	up	4.59	5.98	13.07	9.99	5.285	11.53
Vitvi09g00416	0.447	-1.16055	5.42044e-10	1.9609e-08	up	12.24	13.59	5.77	7.53	12.915	6.65
Vitvi09g00500	3.107	1.63555	1.39081e-08	3.66967e-07	down	2.42	2.73	8.87	6.78	2.575	7.825
Vitvi09g00512	2.078	1.05485	4.70174e-08	1.09698e-06	down	13.95	15.11	26.8	32.82	14.53	29.81
Vitvi09g00559	2.438	1.28578	0.000292898	0.00221648	down	6.2	4.35	12.23	13.33	5.275	12.78
Vitvi09g00772	2.185	1.12753	8.64253e-07	1.46859e-05	up	14.26	17.74	36.11	33.2	16	34.655
Vitvi09g00967	2.11	1.07695	1.14315e-12	6.74363e-11	up	100.67	122.74	239.52	237.37	111.705	238.445
Vitvi09g01077	0.324	-1.62652	1.83911e-06	2.83303e-05	up	14.39	13.47	4.29	4.69	13.93	4.49
Vitvi09g01129	0.485	-1.04283	4.45263e-09	1.31334e-07	down	7.59	8.13	3.83	4.16	7.86	3.995
Vitvi09g01386	0.457	-1.13067	1.69681e-11	8.27096e-10	up	14.75	13.68	6.13	7.92	14.215	7.025
Vitvi09g01409	0.167	-2.58334	7.65978e-08	1.69931e-06	up	9.25	16.89	1.54	2.72	13.07	2.13
Vitvi09g01413	0.496	-1.01298	3.15425e-07	5.94356e-06	up	15.83	17.08	6.6	7.69	16.455	7.145
Vitvi09g01420	0.259	-1.94981	0.00129245	0.0076265	up	5.74	4.72	1.88	0.78	5.23	1.33
Vitvi09g01469	6.167	2.62451	3.03262e-09	9.37088e-08	up	1.75	0.9	8.02	8.1	1.325	8.06
Vitvi09g01542	2.098	1.06869	0.00598861	0.0267312	down	3.88	5.62	8.77	11.05	4.75	9.91
Vitvi09g01557	2.68	1.42214	2.09353e-05	0.000232347	down	1.83	1.99	5.95	4.07	1.91	5.01
Vitvi09g01568	0.49	-1.02847	0.00266804	0.0138678	down	7.64	4.02	1.54	3.87	5.83	2.705
Vitvi09g01570	0.237	-2.07661	1.5649e-08	4.06699e-07	down	8.21	11.56	2.08	2.5	9.885	2.29
Vitvi09g01585	0.419	-1.25467	0.00013683	0.00116113	down	4.23	5	1.5	2.34	4.615	1.92
Vitvi09g01621	3.625	1.85787	0.012211	0.0468949	down	1.64	1.86	7.26	5.39	1.75	6.325
Vitvi09g01641	2.215	1.14733	5.13284e-07	9.27619e-06	up	25.01	22.59	56.48	48.93	23.8	52.705
Vitvi09g01733	0.491	-1.02604	0.000158697	0.00131972	up	13.2	12.51	5.72	6.69	12.855	6.205
Vitvi09g01736	0.373	-1.42092	4.41425e-06	6.07434e-05	up	35.36	24.84	14.49	9.23	30.1	11.86
Vitvi09g01808	2.819	1.49523	3.57616e-25	9.39988e-23	down	66.84	80.43	223.5	198.69	73.635	211.095
Vitvi09g01813	0.428	-1.22571	2.4674e-11	1.16976e-09	down	21.67	26.89	12.63	17.03	24.28	14.83
Vitvi09g01860	0.407	-1.29807	4.28485e-05	0.000432404	down	20.22	10.66	10.36	9.27	15.44	9.815
Vitvi09g01953	2.571	1.36249	0.000737605	0.00479811	up	4.75	5.67	13.03	13.8	5.21	13.415
Vitvi09g02017	5.775	2.5298	0.00266717	0.0138667	up	9.47	17.23	102.79	76.97	13.35	89.88
Vitvi09g02073	0.485	-1.04305	0.0127283	0.0484213	down	5.1	4.41	2.15	2.41	4.755	2.28
Vitvi10g00027	0.347	-1.52514	0.000671394	0.00443291	down	6.6	7.67	1.67	3.24	7.135	2.455
Vitvi10g00093	0.472	-1.08238	0.00534582	0.0244077	up	6.52	4.1	2.21	2.75	5.31	2.48
Vitvi10g00123	2.235	1.16037	1.33222e-07	2.77191e-06	down	9.98	13.24	25.74	25.38	11.61	25.56
Vitvi10g00171	0.427	-1.22897	4.11034e-06	5.75918e-05	down	9.4	10.57	3.89	4.75	9.985	4.32
Vitvi10g00217	2.511	1.32806	1.17905e-40	6.80085e-38	up	215.52	237.1	552.4	562.04	226.31	557.22
Vitvi10g00224	5.342	2.41739	3.30136e-06	4.75401e-05	up	1.82	5.65	23.89	15.15	3.735	19.52
Vitvi10g00243	0.017	-5.88649	6.71288e-07	1.17334e-05	down	36.51	32.71	0.2	0.18	34.61	0.19
Vitvi10g00246	0.453	-1.14176	8.98992e-09	2.48901e-07	down	147.18	129.19	54.94	76.42	138.185	65.68
Vitvi10g00297	0.422	-1.24422	1.3498e-13	9.13481e-12	down	10.95	12.22	4.09	4.31	11.585	4.2
Vitvi10g00298	0.492	-1.02465	2.83325e-17	3.3052e-15	up	229.58	216.36	110.59	111.04	222.97	110.815
Vitvi10g00312	0.332	-1.58903	8.92453e-08	1.93847e-06	down	28.23	28.07	7.19	11.48	28.15	9.335
Vitvi10g00416	0.493	-1.02051	1.16915e-06	1.91916e-05	up	13.41	13.68	6.47	7.09	13.545	6.78
Vitvi10g00440	0.297	-1.75012	9.12327e-44	6.31482e-41	up	43.88	46.78	12.5	13.9	45.33	13.2
Vitvi10g00442	2.087	1.06131	5.34355e-06	7.22388e-05	down	17.12	23.25	35.03	48.11	20.185	41.57
Vitvi10g00469	3.33	1.73533	9.35237e-05	0.000843256	down	7.24	15.74	55.52	28.99	11.49	42.255
Vitvi10g00491	0.211	-2.24635	0.00812854	0.0340408	down	4.72	1.91	0.08	0.58	3.315	0.33
Vitvi10g00496	5.106	2.35212	1.56465e-56	2.03062e-53	down	17.37	18.4	93.37	86.35	17.885	89.86
Vitvi10g00542	2.72	1.44342	5.61765e-14	4.13655e-12	down	18.93	23.62	58.44	57.1	21.275	57.77
Vitvi10g00572	2.034	1.024	1.49862e-12	8.69239e-11	down	26.55	30.15	56.54	56.97	28.35	56.755
Vitvi10g00613	0.33	-1.59926	2.3497e-05	0.000256933	down	20.15	9.47	4.04	5.58	14.81	4.81
Vitvi10g00617	2.899	1.53576	0.00271569	0.0140837	up	3.37	2.67	8.27	9.37	3.02	8.82
Vitvi10g00650	2.173	1.12001	2.70028e-11	1.26858e-09	up	5.83	5.39	11.61	12	5.61	11.805
Vitvi10g00651	0.442	-1.17778	6.98614e-14	5.09008e-12	down	39.64	32.24	11.95	15.47	35.94	13.71
Vitvi10g00674	0.398	-1.32806	0.00153656	0.00878006	up	56.91	69.23	20.36	17.94	63.07	19.15
Vitvi10g00739	0.412	-1.27801	9.1055e-14	6.37288e-12	up	12.95	13.04	5.42	5.01	12.995	5.215
Vitvi10g00740	2.275	1.18585	7.2191e-10	2.52365e-08	up	53.9	48.44	100.46	132.45	51.17	116.455
Vitvi10g00798	3.246	1.69868	4.18742e-25	1.0869e-22	down	54.21	71.27	202.17	200.33	62.74	201.25
Vitvi10g00826	6.35	2.66678	9.96099e-05	0.000889181	up	2.05	3.28	25.68	8.96	2.665	17.32
Vitvi10g00852	2.544	1.34728	6.87096e-07	1.19494e-05	up	24.37	34.03	86.77	59.33	29.2	73.05
Vitvi10g00977	0.29	-1.78576	0.00986917	0.0395802	down	5.18	7.09	1.08	2.49	6.135	1.785
Vitvi10g00992	0.422	-1.24625	2.01108e-07	4.00384e-06	down	10.85	10.01	3.71	5.08	10.43	4.395
Vitvi10g01035	2.013	1.00922	0.000634901	0.00423097	down	6.05	5.41	8.98	13.79	5.73	11.385
Vitvi10g01138	0.4	-1.32258	4.4043e-11	1.97528e-09	up	45.38	41.72	14.49	19.9	43.55	17.195
Vitvi10g01237	2.464	1.30078	0.00267719	0.0139049	up	6.44	7.62	16.01	19.31	7.03	17.66
Vitvi10g01454	0.287	-1.80119	6.37828e-10	2.25246e-08	up	5.75	5.43	1.26	1.84	5.59	1.55
Vitvi10g01554	0.499	-1.00187	4.1972e-09	1.24507e-07	up	20.99	18.63	10.44	10.48	19.81	10.46
Vitvi10g01634	10.722	3.42249	0.000595047	0.00399487	down	0.29	0.62	8.42	1.04	0.455	4.73
Vitvi10g01652	2.776	1.4731	0.00119621	0.00713773	down	1.62	1.14	3.02	5.21	1.38	4.115
Vitvi10g01688	2.564	1.35816	0.000139122	0.00117721	up	10.01	11.09	26.15	29.11	10.55	27.63
Vitvi10g01700	0.486	-1.04064	0.00203745	0.011032	down	244.42	369.78	130.34	217.46	307.1	173.9
Vitvi10g01722	3.647	1.86661	0.0075784	0.0321728	up	1.11	1.44	7.22	1.67	1.275	4.445
Vitvi10g01735	2.517	1.33182	0.00285912	0.0146809	down	4.98	6.56	17.27	11.8	5.77	14.535
Vitvi10g01737	4.534	2.18089	1.01675e-05	0.000124266	down	6.89	3.91	23.33	27.3	5.4	25.315
Vitvi10g01748	2.731	1.44949	0.000193195	0.00156341	up	7.75	13.66	36.17	21.07	10.705	28.62
Vitvi10g01753	0.425	-1.23612	8.90091e-06	0.000110874	up	232.96	157.15	79.23	93.34	195.055	86.285
Vitvi10g01755	2.112	1.07856	0.00711252	0.0307115	up	18.93	25.67	54.69	44.44	22.3	49.565
Vitvi10g01756	2.468	1.30363	2.47137e-05	0.00026798	down	30.74	42.67	107.74	77.84	36.705	92.79
Vitvi10g01764	0.366	-1.44952	4.95248e-10	1.81372e-08	up	23.3	15.54	7.03	7.11	19.42	7.07
Vitvi10g01779	2.153	1.10612	9.55803e-06	0.000117928	up	15.96	21.53	45.67	33.32	18.745	39.495
Vitvi10g01782	0.383	-1.38611	0.000635397	0.00423243	up	5.81	4.31	2.02	1.79	5.06	1.905
Vitvi10g01788	2.719	1.44317	0.00166305	0.00937386	up	2.3	1.93	5.46	5.95	2.115	5.705
Vitvi10g01842	3.068	1.61721	0.000261234	0.0020143	down	8.16	9.91	36.66	18.46	9.035	27.56
Vitvi10g01869	0.492	-1.02363	0.000323144	0.00241023	up	14.55	15.09	6.61	7.88	14.82	7.245
Vitvi10g02048	2.89	1.53102	0.00122447	0.00727502	up	2.75	4.84	16.61	9.59	3.795	13.1
Vitvi10g02055	2.943	1.55705	9.83641e-06	0.000120574	down	4.26	7.32	18.92	14.54	5.79	16.73
Vitvi10g02069	3.556	1.83011	7.16226e-08	1.59919e-06	up	3.29	3.51	10.24	13.76	3.4	12
Vitvi10g02118	0.33	-1.59877	8.39415e-06	0.000105575	down	14.74	19	5.08	6.04	16.87	5.56
Vitvi10g02146	0.258	-1.95202	1.51099e-06	2.39692e-05	up	28.37	31.08	8.54	7.24	29.725	7.89
Vitvi10g02201	2.055	1.03887	2.15725e-10	8.50006e-09	up	65.57	81.59	151.86	150.86	73.58	151.36
Vitvi10g02243	3.026	1.59746	0.000466711	0.00327407	down	5.78	2.84	14.89	9.65	4.31	12.27
Vitvi10g02259	0.451	-1.14894	2.95114e-09	9.1327e-08	up	24.64	29.81	12.39	14.59	27.225	13.49
Vitvi10g02261	0.224	-2.15648	4.75062e-51	4.11028e-48	up	40.05	40.05	8.5	9.14	40.05	8.82
Vitvi10g02336	2.666	1.41485	0.000342493	0.00252015	up	1.58	1.49	3.25	4.81	1.535	4.03
Vitvi10g02337	3.038	1.60335	1.24196e-14	1.01134e-12	down	7.93	8.26	22.55	24.13	8.095	23.34
Vitvi10g02388	5.306	2.40763	0.00231905	0.0122907	down	1.31	2.06	14.77	2.56	1.685	8.665
Vitvi10g02403	3.133	1.64755	4.86899e-32	1.83826e-29	up	79.42	76.27	241.28	251.24	77.845	246.26
Vitvi10g02411	0.151	-2.72472	8.32286e-06	0.000104742	up	7.52	6.16	0.82	2.02	6.84	1.42
Vitvi11g00002	0.433	-1.20897	1.52979e-06	2.42304e-05	down	6.94	6.61	2.93	3.01	6.775	2.97
Vitvi11g00012	0.391	-1.35436	3.64053e-16	3.76097e-14	down	159.65	123.63	58.41	55.86	141.64	57.135
Vitvi11g00016	0.443	-1.17557	5.77294e-05	0.000558338	up	8.56	12.37	4.13	5.08	10.465	4.605
Vitvi11g00019	0.495	-1.01383	1.84602e-16	2.00694e-14	up	18.95	18.16	9.1	9.99	18.555	9.545
Vitvi11g00033	2.166	1.11507	0.00111549	0.00675116	up	29.34	16.17	52.08	46.78	22.755	49.43
Vitvi11g00039	3.813	1.9309	0.0077689	0.0328423	up	0.51	1.04	4.09	1.66	0.775	2.875
Vitvi11g00044	3.038	1.60329	4.85851e-47	3.6031e-44	down	72.79	73.24	220.4	217.37	73.015	218.885
Vitvi11g00075	3.745	1.90485	3.60061e-08	8.65355e-07	down	4.42	4.86	21.46	12.51	4.64	16.985
Vitvi11g00106	0.489	-1.03135	0.000558272	0.00377976	down	8.77	9.57	3.63	5.22	9.17	4.425
Vitvi11g00116	3.094	1.62931	6.68756e-12	3.46302e-10	down	3.6	4.11	11.56	10.7	3.855	11.13
Vitvi11g00133	2.096	1.06771	2.26872e-08	5.73811e-07	down	14.2	17	32.47	32.48	15.6	32.475
Vitvi11g00162	2.323	1.21622	5.23635e-05	0.000513617	up	8.17	10.56	18.95	24.4	9.365	21.675
Vitvi11g00180	0.487	-1.03758	0.000350682	0.00256586	up	21.36	15.61	7.74	9.25	18.485	8.495
Vitvi11g00195	3.006	1.58762	2.65995e-07	5.08599e-06	up	5.47	8.03	17.81	22.39	6.75	20.1
Vitvi11g00207	3.672	1.87642	2.28947e-20	3.86512e-18	up	14.68	13.73	56.13	46.56	14.205	51.345
Vitvi11g00270	0.339	-1.56253	3.04079e-32	1.21427e-29	up	125.26	140.92	42.41	46.69	133.09	44.55
Vitvi11g00276	2.44	1.28668	0.00133646	0.00783943	down	1.47	1.92	3.64	4.53	1.695	4.085
Vitvi11g00322	6.957	2.7984	0.00725688	0.0311727	up	4.13	0.94	22.14	2.17	2.535	12.155
Vitvi11g00339	0.348	-1.5226	4.71964e-11	2.10307e-09	up	28.19	27.19	7.84	11.24	27.69	9.54
Vitvi11g00351	15.566	3.96037	4.62371e-55	4.80056e-52	up	6.97	6.57	117.23	92.95	6.77	105.09
Vitvi11g00394	2.211	1.14456	5.63236e-06	7.54068e-05	down	13.32	15.43	36.35	26.02	14.375	31.185
Vitvi11g00452	2.267	1.18078	4.01984e-15	3.49255e-13	up	66.11	80.92	162.63	169.33	73.515	165.98
Vitvi11g00486	2.776	1.47312	0.000794132	0.00509112	up	2.12	1.97	4.58	6.72	2.045	5.65
Vitvi11g00509	0.427	-1.22691	0.000960762	0.00595885	up	6.43	4.77	1.31	3.11	5.6	2.21
Vitvi11g00560	0.374	-1.41892	3.07052e-12	1.67347e-10	down	52.04	39.96	14.71	19.12	46	16.915
Vitvi11g00574	0.434	-1.20276	1.48614e-11	7.27821e-10	up	180.15	133.58	64.27	69.39	156.865	66.83
Vitvi11g00578	2.009	1.00661	3.72384e-05	0.000384704	up	5.93	6.55	11.12	12.21	6.24	11.665
Vitvi11g00598	2.136	1.0949	0.000781817	0.00502148	down	2.39	2.21	4.22	5.44	2.3	4.83
Vitvi11g00615	0.5	-1.00046	3.42322e-08	8.32356e-07	up	27.76	23.03	11.5	14.11	25.395	12.805
Vitvi11g00724	3.424	1.77578	1.00018e-42	6.69958e-40	up	69.19	79.51	258.74	239.93	74.35	249.335
Vitvi11g00726	0.391	-1.35537	0.000139301	0.00117824	up	22.59	10.65	5.97	6.79	16.62	6.38
Vitvi11g00765	0.316	-1.66131	0.000331571	0.00245545	up	15.32	15.6	4.37	5.58	15.46	4.975
Vitvi11g00795	0.46	-1.11915	1.95306e-09	6.25852e-08	down	11.97	9.41	4.6	5.03	10.69	4.815
Vitvi11g00879	0.357	-1.48791	0.00023345	0.00183749	down	10.97	22.86	4.95	6.93	16.915	5.94
Vitvi11g00893	2.145	1.10094	0.00172121	0.00963884	down	39.78	29.84	94.78	56.13	34.81	75.455
Vitvi11g00924	2.459	1.2981	6.43967e-05	0.00061227	up	14.8	24.26	58.26	35.46	19.53	46.86
Vitvi11g00948	2.086	1.06056	0.000122906	0.00105723	up	44.02	55.72	72.79	133.24	49.87	103.015
Vitvi11g00967	0.412	-1.27956	7.53371e-12	3.86265e-10	down	29.84	26.36	10.84	13.47	28.1	12.155
Vitvi11g01045	4.454	2.15506	1.48065e-08	3.87714e-07	up	2.59	5.23	19.29	14.78	3.91	17.035
Vitvi11g01153	2.817	1.49396	0.00109788	0.00665617	down	4.46	11.13	23.93	19.22	7.795	21.575
Vitvi11g01227	4.164	2.05795	0.00047407	0.0033145	down	0.51	0.84	2.82	2.73	0.675	2.775
Vitvi11g01258	3.506	1.80964	1.02907e-05	0.00012555	down	2.34	3.85	13.26	8.31	3.095	10.785
Vitvi11g01265	2.445	1.28971	1.3931e-06	2.23726e-05	down	13.19	15	39.51	28.45	14.095	33.98
Vitvi11g01268	0.374	-1.41849	1.76636e-15	1.65966e-13	up	666.14	628.13	197.3	283.9	647.135	240.6
Vitvi11g01360	2.718	1.44236	0.00109502	0.00664274	up	1.97	3.95	8.15	7.82	2.96	7.985
Vitvi11g01371	4.011	2.0039	4.41649e-05	0.000444324	up	2.6	4.45	19.43	8.1	3.525	13.765
Vitvi11g01386	0.376	-1.41288	7.63323e-05	0.00070824	down	12.29	13.52	5.1	4.55	12.905	4.825
Vitvi11g01390	2.3	1.20164	2.80783e-05	0.000299151	up	7.97	6.82	17.63	16.09	7.395	16.86
Vitvi11g01407	0.407	-1.29759	6.94472e-08	1.56068e-06	up	27.96	25.26	11.1	11.52	26.61	11.31
Vitvi11g01422	2.21	1.14419	3.27484e-07	6.15402e-06	up	53.63	65.67	149.6	114.6	59.65	132.1
Vitvi11g01476	2.271	1.18356	0.000128413	0.00109597	up	13.45	14.39	33.92	30.12	13.92	32.02
Vitvi11g01499	0.379	-1.40051	2.91837e-05	0.000309184	up	1245.21	1359.16	595.46	688.48	1302.18	641.97
Vitvi11g01521	0.392	-1.35189	4.67702e-22	9.42896e-20	down	356.38	373.93	140.89	155.1	365.155	147.995
Vitvi11g01573	0.478	-1.06489	1.33014e-13	9.05586e-12	up	11.27	12.51	5.6	5.87	11.89	5.735
Vitvi11g01629	2.074	1.05222	1.52088e-05	0.000174868	up	25.96	29.91	60.37	57.5	27.935	58.935
Vitvi11g01634	2.77	1.47011	0.00238812	0.0126117	down	9.14	11.76	44.31	19.08	10.45	31.695
Vitvi11g01702	0.285	-1.81266	9.73787e-09	2.67469e-07	up	17.73	13.94	3.64	5.28	15.835	4.46
Vitvi12g00100	2.777	1.47334	6.31941e-15	5.42242e-13	down	12.24	16	35.61	37.87	14.12	36.74
Vitvi12g00116	0.492	-1.02199	5.20856e-08	1.2004e-06	up	20.81	18.49	8.23	10.7	19.65	9.465
Vitvi12g00120	0.371	-1.43076	2.13101e-16	2.28095e-14	up	46.72	46.08	15.5	18.52	46.4	17.01
Vitvi12g00188	2.419	1.27428	0.00368717	0.0180024	down	1.55	2.61	5.03	4.81	2.08	4.92
Vitvi12g00195	0.163	-2.61284	3.09824e-05	0.000325746	down	5.44	5.85	0.96	0.92	5.645	0.94
Vitvi12g00206	3.248	1.69958	0.000128554	0.00109672	down	1.46	2.14	4.36	7.07	1.8	5.715
Vitvi12g00208	0.367	-1.44445	0.00228446	0.0121353	up	5.18	5.96	2.39	1.65	5.57	2.02
Vitvi12g00213	0.345	-1.53562	1.5985e-05	0.000182578	up	7.78	8.19	2.29	3.34	7.985	2.815
Vitvi12g00269	2.015	1.01112	0.00696104	0.0302314	down	4.38	3.96	6.06	10.59	4.17	8.325
Vitvi12g00298	0.447	-1.16242	1.45401e-05	0.000168485	up	25.78	23.28	12.3	9.38	24.53	10.84
Vitvi12g00300	2.495	1.3191	0.000336316	0.0024835	down	2.55	3.88	9.46	6.19	3.215	7.825
Vitvi12g00315	2.668	1.41578	6.22806e-06	8.19035e-05	down	23.53	28.64	85.41	53.75	26.085	69.58
Vitvi12g00346	2.15	1.10424	2.87503e-09	8.95054e-08	up	12.2	13.02	24.29	29.09	12.61	26.69
Vitvi12g00354	0.198	-2.33977	0.00123795	0.00734458	down	5.59	5.66	0.46	1.67	5.625	1.065
Vitvi12g00355	0.413	-1.27684	5.83198e-06	7.73538e-05	up	79.49	56.31	29.77	47.29	67.9	38.53
Vitvi12g00386	5.198	2.37794	0.00991465	0.0397141	down	0.18	0.7	3.26	1.21	0.44	2.235
Vitvi12g00405	2.037	1.02646	4.17607e-17	4.76462e-15	down	127.2	135.71	274.79	252.14	131.455	263.465
Vitvi12g00406	2.096	1.06758	0.0126053	0.0480139	up	1.61	1.71	2.47	4.39	1.66	3.43
Vitvi12g00414	2.219	1.14968	0.0100442	0.0401016	down	6.22	11.77	25.69	13.33	8.995	19.51
Vitvi12g00429	0.197	-2.34723	2.67429e-30	8.81454e-28	up	203.76	168.31	29.26	42.95	186.035	36.105
Vitvi12g00431	0.416	-1.26597	3.04785e-14	2.31826e-12	up	40.39	33.66	15.79	16.78	37.025	16.285
Vitvi12g00433	0.495	-1.01398	6.80214e-06	8.81688e-05	up	11.03	9.37	4.14	6.49	10.2	5.315
Vitvi12g00453	2.031	1.02221	5.22256e-12	2.75945e-10	down	47.11	47.64	101.21	87.71	47.375	94.46
Vitvi12g00473	3.022	1.59537	0.00596906	0.0266605	down	1.74	0.83	2.99	3.48	1.285	3.235
Vitvi12g00649	2.416	1.27291	0.00951236	0.0384053	up	51.12	80.68	193.22	117.62	65.9	155.42
Vitvi12g00678	2.598	1.3775	7.73456e-05	0.000716361	up	2.42	4.09	9.51	6.96	3.255	8.235
Vitvi12g00679	3.2	1.6782	0.00435782	0.0206645	up	0.59	0.82	6.94	2.08	0.705	4.51
Vitvi12g00683	3.677	1.87867	9.20811e-34	3.98347e-31	up	16.37	21	61.8	63.37	18.685	62.585
Vitvi12g00706	2.064	1.04571	4.0387e-05	0.000411753	down	5.09	6.18	10.83	11.67	5.635	11.25
Vitvi12g00763	0.492	-1.02392	0.000129632	0.00110546	down	8.78	7.72	3.5	4.48	8.25	3.99
Vitvi12g00905	2.999	1.5846	6.88634e-15	5.86045e-13	down	45.21	56.67	169.49	129.7	50.94	149.595
Vitvi12g00913	2.774	1.47184	2.78144e-15	2.51116e-13	up	7.48	6.94	18.24	20.46	7.21	19.35
Vitvi12g01407	0.452	-1.14467	0.00325435	0.0162796	up	5.52	4.21	1.83	2.49	4.865	2.16
Vitvi12g01610	5.373	2.42578	0.00415377	0.0199257	up	1.3	0.38	6.79	2.02	0.84	4.405
Vitvi12g01637	0.316	-1.66097	1.99889e-11	9.58591e-10	up	12.45	9.32	6.29	5.48	10.885	5.885
Vitvi12g01655	0.3	-1.73692	4.52325e-05	0.000452434	up	10.28	10.22	2.58	5.08	10.25	3.83
Vitvi12g01682	2.003	1.00236	0.00042982	0.00304927	up	4.6	5.34	8.66	11.01	4.97	9.835
Vitvi12g01684	3.26	1.70502	1.05362e-05	0.00012772	up	1.91	3.16	7.36	8.95	2.535	8.155
Vitvi12g01705	2.088	1.06232	0.00196701	0.0107289	up	2.98	4.51	7.45	7.93	3.745	7.69
Vitvi12g01724	2.717	1.44215	0.00452119	0.0213151	down	22.58	47.98	88.79	99.39	35.28	94.09
Vitvi12g01802	0.449	-1.15451	3.76832e-11	1.71976e-09	up	23.15	25.08	14.68	18.53	24.115	16.605
Vitvi12g01943	3.489	1.80277	0.00211013	0.0113494	up	1.94	5.61	13.03	13.3	3.775	13.165
Vitvi12g01945	2.658	1.41056	9.26576e-32	3.3755e-29	down	34.52	36.95	69.45	67.92	35.735	68.685
Vitvi12g01952	2.08	1.05686	1.49747e-08	3.91131e-07	up	20.64	15.52	42.68	36.6	18.08	39.64
Vitvi12g01982	0.476	-1.06961	3.21403e-14	2.43575e-12	down	20.28	18.5	9.91	11.9	19.39	10.905
Vitvi12g02011	0.41	-1.28456	5.20336e-23	1.14944e-20	down	20.6	19.32	7.97	8.45	19.96	8.21
Vitvi12g02021	0.48	-1.05798	7.25999e-07	1.25733e-05	up	7.7	7.49	4	3.69	7.595	3.845
Vitvi12g02044	0.428	-1.22385	0.0104131	0.0412491	up	3.26	4.35	1.73	1.47	3.805	1.6
Vitvi12g02137	0.284	-1.816	1.75011e-34	7.73214e-32	up	99.56	117.31	31.31	29.1	108.435	30.205
Vitvi12g02138	17.977	4.16806	6.05072e-42	3.69539e-39	up	4.17	7.03	116.16	82.58	5.6	99.37
Vitvi12g02233	2.506	1.32551	0.00755528	0.0321158	down	3.63	2.98	9.25	7.31	3.305	8.28
Vitvi12g02355	0.11	-3.1797	3.28945e-16	3.41528e-14	up	26.08	19.86	1.88	3.49	22.97	2.685
Vitvi12g02394	0.366	-1.44837	5.85093e-05	0.000564212	up	36.06	44.6	10.93	19.05	40.33	14.99
Vitvi12g02409	0.466	-1.10035	1.48823e-06	2.36992e-05	up	18.05	15.73	6.81	8.68	16.89	7.745
Vitvi12g02448	0.446	-1.16586	1.7591e-05	0.000198736	down	15.79	13.68	6.82	6.17	14.735	6.495
Vitvi12g02456	5.223	2.38483	3.24536e-21	6.2398e-19	down	10.47	10.01	50.38	57.37	10.24	53.875
Vitvi12g02457	3.447	1.78515	7.46567e-10	2.60546e-08	down	10.19	9.45	28.83	39.26	9.82	34.045
Vitvi12g02458	2.919	1.54544	6.85527e-06	8.86914e-05	down	5.27	6.72	18.08	16.99	5.995	17.535
Vitvi12g02459	2.831	1.50107	9.97137e-13	5.91587e-11	down	35.05	46.77	103.33	123.04	40.91	113.185
Vitvi12g02460	3.084	1.62468	2.47084e-09	7.76202e-08	up	21.84	34.97	74.06	100.81	28.405	87.435
Vitvi12g02462	3.035	1.60184	2.8408e-18	3.88088e-16	up	112.13	142.66	373.85	491	127.395	432.425
Vitvi12g02465	2.942	1.55688	6.3211e-22	1.26209e-19	down	36.61	45.53	116.87	137.26	41.07	127.065
Vitvi12g02466	3.319	1.7309	7.47743e-13	4.55334e-11	down	22.11	32.19	81.99	98.69	27.15	90.34
Vitvi12g02544	0.485	-1.04268	1.81887e-06	2.806e-05	down	14.14	12.09	8.93	8.99	13.115	8.96
Vitvi12g02552	2.106	1.07481	1.63102e-09	5.30849e-08	down	16.86	17.6	37.98	35.45	17.23	36.715
Vitvi12g02574	0.287	-1.80008	0.0013296	0.00781024	up	6.26	8.49	1.68	2.56	7.375	2.12
Vitvi12g02584	0.391	-1.35645	0.00315544	0.0158727	up	7.45	8.01	2.8	3.23	7.73	3.015
Vitvi12g02585	2.049	1.03475	7.53744e-07	1.29673e-05	up	10.77	13.99	23.67	26.22	12.38	24.945
Vitvi12g02701	0.457	-1.1284	4.15692e-09	1.23489e-07	up	4.94	5.68	3.29	3.56	5.31	3.425
Vitvi12g02705	0.384	-1.38243	1.67975e-07	3.40957e-06	up	11.8	8.38	3.4	4.16	10.09	3.78
Vitvi12g02724	0.241	-2.05117	6.77824e-10	2.3856e-08	up	5.24	4.2	2.45	2.72	4.72	2.585
Vitvi12g02758	0.285	-1.80934	5.8908e-10	2.10901e-08	up	42.36	30.59	10.78	10.13	36.475	10.455
Vitvi13g00004	0.187	-2.41725	2.07684e-23	4.79173e-21	up	38.32	29.35	5.25	7.42	33.835	6.335
Vitvi13g00026	0.5	-1.00091	0.000116939	0.00101642	down	6.46	6.44	3.56	2.74	6.45	3.15
Vitvi13g00035	2.414	1.2713	0.00208429	0.0112319	up	11.96	18.59	48.87	22.46	15.275	35.665
Vitvi13g00070	0.228	-2.13077	1.26848e-13	8.66444e-12	down	179.17	155.52	27.61	50.33	167.345	38.97
Vitvi13g00124	0.246	-2.02278	7.82494e-15	6.60508e-13	down	13.52	10.34	3.12	2.65	11.93	2.885
Vitvi13g00131	2.029	1.02054	1.18931e-17	1.46131e-15	up	183.7	203.74	400.32	378.27	193.72	389.295
Vitvi13g00169	1653.01	10.6909	0.0128712	0.0488254	down	0	0	24.97	0.3	0	12.635
Vitvi13g00172	4.49	2.16682	7.34155e-33	2.98916e-30	down	10.3	10.8	44.53	49.5	10.55	47.015
Vitvi13g00190	2.002	1.00112	1.91597e-07	3.82549e-06	down	10.16	9.85	19.78	19.64	10.005	19.71
Vitvi13g00191	2.076	1.05414	0.00141252	0.00820677	down	2.64	3.76	6.53	6.58	3.2	6.555
Vitvi13g00204	2.374	1.24733	3.75e-07	6.98375e-06	down	5.79	8.1	16.05	15.68	6.945	15.865
Vitvi13g00241	3.002	1.58573	4.02296e-26	1.08993e-23	down	61.38	70.58	186.7	212.14	65.98	199.42
Vitvi13g00255	4.181	2.06395	4.52915e-22	9.22038e-20	up	32.84	36.69	119.67	171.76	34.765	145.715
Vitvi13g00273	0.464	-1.10858	5.72899e-12	2.99654e-10	down	11.52	12.27	4.9	5.9	11.895	5.4
Vitvi13g00278	10.28	3.36171	2.02733e-17	2.43339e-15	down	5.89	2.96	48.39	43.43	4.425	45.91
Vitvi13g00286	2.572	1.36306	1.9922e-06	3.02178e-05	up	3.17	4.32	8.85	9.95	3.745	9.4
Vitvi13g00306	0.361	-1.47148	2.90825e-10	1.12668e-08	up	11.21	13.34	4.38	4.15	12.275	4.265
Vitvi13g00343	2.393	1.25884	2.45164e-18	3.41666e-16	up	96.15	102.91	251.85	217.83	99.53	234.84
Vitvi13g00354	2.068	1.04843	2.03956e-06	3.08011e-05	up	15.59	21.04	34.56	40.33	18.315	37.445
Vitvi13g00387	0.266	-1.90931	0.00410806	0.0197338	up	7.01	2.97	1.13	1.5	4.99	1.315
Vitvi13g00399	46.415	5.53651	0.000281285	0.00214581	up	7.91	0.4	275.78	182.19	4.155	228.985
Vitvi13g00405	9.406	3.23354	2.49515e-18	3.45412e-16	up	4.11	4.24	47	31.26	4.175	39.13
Vitvi13g00409	13.405	3.74469	2.83554e-70	4.90667e-67	up	54.41	69.01	950.08	693.1	61.71	821.59
Vitvi13g00410	17.642	4.14093	1.14508e-83	3.96293e-80	down	10.88	12.92	231.98	188.56	11.9	210.27
Vitvi13g00451	3.71	1.8913	2.50691e-19	3.74503e-17	up	92.76	68.66	323.01	273.41	80.71	298.21
Vitvi13g00471	6.856	2.77732	3.97522e-08	9.45029e-07	up	3.46	1.85	20.38	16.03	2.655	18.205
Vitvi13g00490	6.156	2.62201	4.49189e-15	3.87029e-13	down	7.99	4.29	43.62	33.31	6.14	38.465
Vitvi13g00491	6.554	2.71227	3.07759e-170	2.1302e-166	up	209.29	225.18	1360.53	1485.73	217.235	1423.13
Vitvi13g00590	2.12	1.08407	2.53923e-14	1.95285e-12	up	124.62	108.81	236.65	256.98	116.715	246.815
Vitvi13g00646	0.373	-1.42371	3.22753e-15	2.86409e-13	down	36.25	29.87	11.4	13.4	33.06	12.4
Vitvi13g00706	2.006	1.00401	6.60391e-06	8.59212e-05	up	49.65	63.62	107.26	127.12	56.635	117.19
Vitvi13g00805	0.493	-1.0191	3.01403e-05	0.000317697	up	4.27	5.21	2.17	2.4	4.74	2.285
Vitvi13g00864	0.437	-1.1952	0.000170987	0.0014095	up	7.92	7.89	3.26	3.56	7.905	3.41
Vitvi13g00974	0.299	-1.74413	2.94649e-18	3.99894e-16	up	163.63	143.11	44.63	48.85	153.37	46.74
Vitvi13g00981	0.449	-1.15534	6.04031e-08	1.3753e-06	up	20.98	22.5	8.43	10.82	21.74	9.625
Vitvi13g00991	0.344	-1.53852	4.1573e-06	5.81714e-05	up	9.7	6.27	2.62	3.03	7.985	2.825
Vitvi13g01107	5.952	2.57337	8.63972e-63	1.28146e-59	up	26.62	29.97	240.41	232.03	28.295	236.22
Vitvi13g01187	0.441	-1.18083	9.28505e-10	3.17112e-08	up	83.96	96.88	39.32	40.02	90.42	39.67
Vitvi13g01212	0.289	-1.79102	8.80698e-12	4.44956e-10	up	4.88	5.16	1.15	1.69	5.02	1.42
Vitvi13g01272	0.475	-1.07409	1.66249e-07	3.37909e-06	down	12.57	13.03	5.27	7.5	12.8	6.385
Vitvi13g01323	0.32	-1.64422	2.53485e-17	2.99069e-15	up	15.62	13.58	6.46	6.02	14.6	6.24
Vitvi13g01327	0.338	-1.56671	3.25009e-14	2.45411e-12	down	13.07	15.24	4.79	4.58	14.155	4.685
Vitvi13g01333	2.173	1.1198	0.000763223	0.00493103	down	7.93	7.86	16.53	16.93	7.895	16.73
Vitvi13g01335	2.011	1.00816	0.00382355	0.0185591	down	7.25	6.42	12.2	14.14	6.835	13.17
Vitvi13g01364	0.176	-2.51034	0.00100461	0.00617365	down	28.98	7.59	13.76	18.28	18.285	16.02
Vitvi13g01389	2.676	1.42024	1.2275e-31	4.39466e-29	down	72.08	83.62	201.09	209.16	77.85	205.125
Vitvi13g01395	0.36	-1.47446	2.90972e-09	9.03145e-08	up	49.16	34.96	13.09	16.85	42.06	14.97
Vitvi13g01398	0.482	-1.05249	4.55591e-13	2.89307e-11	down	38.51	35.17	17.29	17.66	36.84	17.475
Vitvi13g01486	0.467	-1.0992	0.00225202	0.0119844	down	4.52	5.59	1.68	2.53	5.055	2.105
Vitvi13g01492	2.417	1.27347	2.62574e-13	1.7092e-11	down	14.45	11.87	28.1	34.18	13.16	31.14
Vitvi13g01546	0.481	-1.05483	1.43225e-05	0.000166614	down	11.8	10.9	5.17	7.76	11.35	6.465
Vitvi13g01549	0.36	-1.47503	0.00034743	0.00255105	down	14.55	11.6	3.14	6.15	13.075	4.645
Vitvi13g01569	2.049	1.03501	7.31141e-21	1.35555e-18	up	133.7	134.24	260.76	289.13	133.97	274.945
Vitvi13g01579	0.448	-1.15775	5.24301e-14	3.87442e-12	up	14.8	16.69	6.82	7.46	15.745	7.14
Vitvi13g01582	0.346	-1.53128	9.6939e-12	4.86217e-10	down	7.53	9.47	2.94	2.82	8.5	2.88
Vitvi13g01618	0.351	-1.50897	1.11416e-26	3.21327e-24	up	15.71	17.68	6.39	5.71	16.695	6.05
Vitvi13g01643	2.057	1.04059	2.71538e-09	8.50452e-08	down	37.53	40.93	79.6	82.52	39.23	81.06
Vitvi13g01660	3.282	1.71473	0.00515793	0.0237114	down	18.68	79.44	191.12	229.3	49.06	210.21
Vitvi13g01661	0.121	-3.04674	8.64421e-06	0.000108261	down	7.13	7.38	0.51	1.29	7.255	0.9
Vitvi13g01702	2.097	1.06814	2.6239e-15	2.37927e-13	up	40.24	39.51	90.74	81.51	39.875	86.125
Vitvi13g01722	0.478	-1.06423	0.00210538	0.0113289	down	7.14	7.77	3.54	3.02	7.455	3.28
Vitvi13g01728	2.186	1.12852	3.61085e-08	8.66814e-07	down	23.87	29.05	56.29	59.46	26.46	57.875
Vitvi13g01779	2.463	1.30023	0.000144469	0.00121848	up	2.21	3.34	6.47	6.99	2.775	6.73
Vitvi13g01798	0.425	-1.23282	0.000156282	0.00130329	down	9.12	13.81	5.63	6.44	11.465	6.035
Vitvi13g01812	0.392	-1.35191	7.74042e-11	3.26687e-09	down	13.34	14.66	5.44	5.34	14	5.39
Vitvi13g01813	0.466	-1.1022	1.00736e-08	2.73435e-07	down	6.36	7.86	3.14	3.28	7.11	3.21
Vitvi13g01814	0.364	-1.4587	0.00610474	0.0271271	up	4.35	7.1	2.48	1.6	5.725	2.04
Vitvi13g01825	2.386	1.25456	0.000741387	0.00481392	up	2.46	2.66	6.55	5.46	2.56	6.005
Vitvi13g01854	4.253	2.08844	2.57786e-15	2.34778e-13	down	16.99	27.87	87.92	102.75	22.43	95.335
Vitvi13g01898	0.462	-1.11294	0.000248772	0.00193185	up	252.64	190.09	97.92	125.56	221.365	111.74
Vitvi13g01902	2.069	1.04888	0.0124478	0.0475317	down	8.52	8.13	15.49	19.69	8.325	17.59
Vitvi13g01917	2.089	1.06306	5.55276e-10	2.00527e-08	up	88.39	91.89	193.29	196.79	90.14	195.04
Vitvi13g01937	0.412	-1.27846	0.00212795	0.0114296	up	7.17	6.79	2.32	3.34	6.98	2.83
Vitvi13g01939	0.342	-1.54765	0.00289191	0.0148127	down	6.29	5.38	1.46	3.13	5.835	2.295
Vitvi13g01952	0.401	-1.31714	8.36528e-15	7.03259e-13	down	37.98	39.1	16.59	17.26	38.54	16.925
Vitvi13g01953	2.224	1.15332	0.000504013	0.00348165	down	1.6	2.17	7.28	4.06	1.885	5.67
Vitvi13g01965	2.022	1.01575	0.0103838	0.0411646	down	35.79	30.84	67.98	80.04	33.315	74.01
Vitvi13g01979	2.522	1.33463	0.000194294	0.00156863	up	4.22	4.27	12.35	8.81	4.245	10.58
Vitvi13g01980	8.34	3.06005	6.53862e-16	6.55915e-14	up	1.89	1.9	17.68	13.39	1.895	15.535
Vitvi13g01981	5.048	2.33566	7.10945e-05	0.000666792	down	0.79	1.17	5.77	3.77	0.98	4.77
Vitvi13g01999	2.824	1.49762	1.95429e-08	4.97491e-07	up	6.66	7.97	22.55	18.21	7.315	20.38
Vitvi13g02008	2.118	1.08297	7.31098e-09	2.07805e-07	up	9.19	8.56	16.33	20.21	8.875	18.27
Vitvi13g02014	19.581	4.2914	1.38894e-14	1.12223e-12	down	0.74	1.21	23.47	14.05	0.975	18.76
Vitvi13g02016	6.524	2.70566	3.68255e-06	5.23038e-05	down	1.53	1.72	10.63	11.04	1.625	10.835
Vitvi13g02017	7.072	2.82218	9.6722e-23	2.04942e-20	down	10.96	14.68	106.67	73.6	12.82	90.135
Vitvi13g02024	3.195	1.676	7.99357e-31	2.72109e-28	up	353.96	337.62	1189.26	1016.68	345.79	1102.97
Vitvi13g02040	0.468	-1.09483	0.0105191	0.0415486	up	10.05	9.93	3.62	5.69	9.99	4.655
Vitvi13g02041	2.653	1.40778	0.000989328	0.00610321	up	13.36	9.46	32.96	30	11.41	31.48
Vitvi13g02043	2.627	1.39332	0.000254665	0.0019695	up	17.53	16.27	48.11	45.49	16.9	46.8
Vitvi13g02054	2.236	1.16119	9.81178e-17	1.09539e-14	up	239.9	296.99	602.35	576.09	268.445	589.22
Vitvi13g02144	0.246	-2.02058	0.00516406	0.0237327	up	5.21	5.62	1.49	1.17	5.415	1.33
Vitvi13g02159	0.358	-1.4807	6.14222e-16	6.25212e-14	up	7.18	7.86	2.4	2.87	7.52	2.635
Vitvi13g02194	0.309	-1.69475	1.32403e-27	3.98456e-25	up	19.1	16.41	7.23	7.43	17.755	7.33
Vitvi13g02200	0.12	-3.05913	3.04551e-05	0.000320853	up	10.67	11.84	1.32	1.78	11.255	1.55
Vitvi13g02203	0.293	-1.77133	1.2908e-05	0.000152206	up	4.99	5.02	1.08	1.81	5.005	1.445
Vitvi13g02225	0.252	-1.99081	4.19298e-11	1.88866e-09	up	6.93	7.77	1.83	1.79	7.35	1.81
Vitvi13g02241	0.384	-1.3806	9.38917e-19	1.33538e-16	down	39.8	39.98	24.26	23.99	39.89	24.125
Vitvi13g02267	0.208	-2.26615	1.98554e-18	2.7858e-16	up	8.65	11.55	1.98	2.22	10.1	2.1
Vitvi13g02272	0.374	-1.42016	4.44979e-18	5.81132e-16	up	19.23	21.65	8.17	10.29	20.44	9.23
Vitvi13g02291	0.472	-1.0821	3.55415e-08	8.58665e-07	up	8.57	9.46	6.34	7.11	9.015	6.725
Vitvi13g02295	2.586	1.37068	0.0002029	0.00162817	down	17.1	20.09	60.17	37.21	18.595	48.69
Vitvi13g02309	0.334	-1.58107	1.43083e-33	6.06351e-31	down	132.09	129.69	63.22	79.2	130.89	71.21
Vitvi13g02312	0.412	-1.27925	9.2462e-13	5.51717e-11	down	7.38	7.37	2.83	3.12	7.375	2.975
Vitvi13g02351	0.495	-1.01401	7.21457e-10	2.52365e-08	down	16.89	16.31	9.5	10.29	16.6	9.895
Vitvi13g02354	0.397	-1.33108	1.20215e-06	1.96556e-05	down	21.7	23.2	9.71	10.14	22.45	9.925
Vitvi13g02383	0.401	-1.31919	0.00330032	0.0164778	down	6.26	4.03	1.87	2.09	5.145	1.98
Vitvi13g02419	2.176	1.12188	0.0019131	0.0104651	down	2.35	2.49	4.45	5.74	2.42	5.095
Vitvi13g02435	2.118	1.08265	4.24447e-06	5.90726e-05	down	9.27	7.4	16.85	17.95	8.335	17.4
Vitvi13g02454	0.5	-1.00081	3.43361e-09	1.03783e-07	down	24.16	19.73	16.48	19.88	21.945	18.18
Vitvi13g02470	0.411	-1.28444	7.79816e-21	1.433e-18	down	15.2	16.53	5.76	6.28	15.865	6.02
Vitvi13g02474	0.381	-1.39343	1.71109e-30	5.73076e-28	up	41.26	45	16.78	18.98	43.13	17.88
Vitvi13g02488	2.076	1.05351	3.53835e-10	1.34076e-08	down	81.3	79.99	156.59	184.56	80.645	170.575
Vitvi13g02497	0.46	-1.12049	1.7021e-15	1.62129e-13	down	16.23	18.26	8.66	9.26	17.245	8.96
Vitvi13g02522	2.735	1.45168	1.16546e-09	3.89706e-08	down	82.96	141.22	299.7	311.34	112.09	305.52
Vitvi13g02534	0.432	-1.21165	1.81289e-06	2.79886e-05	down	18.39	14.49	6.23	7.76	16.44	6.995
Vitvi13g02560	0.345	-1.53432	4.17264e-06	5.8319e-05	down	12.64	21.15	7.23	8.36	16.895	7.795
Vitvi13g02564	0.353	-1.50086	7.01881e-16	7.007e-14	up	16.73	18.43	5.35	6.74	17.58	6.045
Vitvi13g02597	0.406	-1.29874	1.47058e-12	8.55369e-11	up	8.05	8.67	3.31	3.21	8.36	3.26
Vitvi14g00050	2.036	1.02566	5.70012e-06	7.59711e-05	down	2.59	2.62	5.39	5.01	2.605	5.2
Vitvi14g00123	2.565	1.35901	0.00967897	0.0389428	down	3.11	5.23	9.86	11.69	4.17	10.775
Vitvi14g00141	2.349	1.23178	1.04386e-14	8.63578e-13	down	39.9	39.54	93.89	92.32	39.72	93.105
Vitvi14g00189	2.876	1.52411	1.4236e-14	1.14135e-12	up	64.06	89.89	227.09	226.14	76.975	226.615
Vitvi14g00340	3.209	1.68192	0.000581713	0.00391421	down	1.63	3.31	9.7	5.69	2.47	7.695
Vitvi14g00366	0.463	-1.10964	3.74079e-10	1.41232e-08	up	6.25	6.64	2.66	3.23	6.445	2.945
Vitvi14g00468	2.589	1.37254	1.95655e-07	3.90277e-06	down	10.41	9.97	27.96	24.48	10.19	26.22
Vitvi14g00560	2.023	1.01619	9.77002e-07	1.64005e-05	down	16.79	23.99	39.44	37.9	20.39	38.67
Vitvi14g00564	7.259	2.85982	0.00214157	0.011479	down	0.73	1.14	10.42	3.06	0.935	6.74
Vitvi14g00619	2.044	1.03172	3.30118e-18	4.42252e-16	down	82.05	91.78	178.81	177.25	86.915	178.03
Vitvi14g00630	2.302	1.20274	2.79256e-07	5.31996e-06	up	8.65	13.02	24.25	20.75	10.835	22.5
Vitvi14g00658	2.187	1.12904	4.47581e-08	1.05017e-06	up	149.95	216.31	591.43	444.1	183.13	517.765
Vitvi14g00672	2.491	1.31663	2.80026e-11	1.30596e-09	up	361.3	470.7	1155.65	882.05	416	1018.85
Vitvi14g00702	0.324	-1.62774	0.000240298	0.0018801	up	4.37	5.89	1.95	1.3	5.13	1.625
Vitvi14g00737	3.584	1.84162	0.0132016	0.0497517	up	0.63	2.81	9.09	3.17	1.72	6.13
Vitvi14g00971	0.2	-2.32443	6.3007e-19	9.02303e-17	down	51.05	55.67	8.63	12.71	53.36	10.67
Vitvi14g01040	0.326	-1.61524	5.55756e-16	5.713e-14	up	59	62.36	19.08	18.72	60.68	18.9
Vitvi14g01128	2.129	1.0903	1.68837e-09	5.47796e-08	up	59.61	53.4	120.5	123.08	56.505	121.79
Vitvi14g01149	2.152	1.10586	0.005481	0.0248771	up	6.68	4.82	3.99	4.21	5.75	4.1
Vitvi14g01246	2.14	1.0974	9.5338e-14	6.59898e-12	up	67.86	63.55	140.88	140.27	65.705	140.575
Vitvi14g01273	0.478	-1.06384	0.000660483	0.0043706	up	31.66	23.76	14.02	12.56	27.71	13.29
Vitvi14g01296	0.47	-1.08874	1.81235e-09	5.85279e-08	up	110.82	91.21	41.04	52.73	101.015	46.885
Vitvi14g01340	3.434	1.77985	2.07114e-23	4.79173e-21	up	9.5	8.9	32.24	29.48	9.2	30.86
Vitvi14g01354	4.944	2.30559	3.63401e-11	1.66212e-09	down	10.93	11.93	70.61	42.1	11.43	56.355
Vitvi14g01411	0.423	-1.24036	0.00219978	0.0117305	up	16.07	17.23	5.98	8.25	16.65	7.115
Vitvi14g01423	0.124	-3.01533	0.00371844	0.0181252	down	4.52	1.33	0.4	0.39	2.925	0.395
Vitvi14g01447	2.048	1.03406	1.14896e-07	2.44197e-06	up	16.68	19.89	36.16	37.99	18.285	37.075
Vitvi14g01474	2.662	1.41239	8.2496e-05	0.00075846	down	7.29	6.21	23.99	15.02	6.75	19.505
Vitvi14g01478	2.173	1.11937	1.02061e-07	2.19389e-06	up	48.8	64.53	117.67	102.99	56.665	110.33
Vitvi14g01487	0.318	-1.65095	2.79688e-10	1.09165e-08	up	15.13	11.87	4.68	4.02	13.5	4.35
Vitvi14g01489	14.841	3.89152	0.000426656	0.00303109	up	0	0.78	3.64	7.89	0.39	5.765
Vitvi14g01522	2.047	1.03341	0.00494205	0.0229117	down	13.15	17.12	40.38	20.18	15.135	30.28
Vitvi14g01523	6.125	2.61471	3.06897e-09	9.46913e-08	down	2.47	3.62	23.01	13.86	3.045	18.435
Vitvi14g01527	0.477	-1.06942	0.00147181	0.00846363	up	23.11	19.75	8.74	11.96	21.43	10.35
Vitvi14g01540	2.272	1.18383	0.0108558	0.0425964	up	2.37	4.42	8.37	6.85	3.395	7.61
Vitvi14g01561	0.343	-1.54508	1.64268e-08	4.24786e-07	down	9.24	9.22	3.03	3.83	9.23	3.43
Vitvi14g01623	2.103	1.07229	2.73099e-05	0.000292013	down	63.98	79.28	179.92	120.92	71.63	150.42
Vitvi14g01635	0.311	-1.68422	3.63432e-09	1.09214e-07	up	13.37	13.77	4.3	4.04	13.57	4.17
Vitvi14g01678	4.076	2.02717	4.24727e-12	2.27306e-10	up	4.78	8.85	28.22	26.59	6.815	27.405
Vitvi14g01684	0.462	-1.11271	3.14755e-10	1.21259e-08	up	341.86	284.94	118.82	156.66	313.4	137.74
Vitvi14g01820	0.439	-1.18617	7.14189e-11	3.02471e-09	down	12.19	13.24	4.77	5.94	12.715	5.355
Vitvi14g01824	9.66	3.27207	8.98896e-05	0.000814904	up	9.31	32	241.97	153.12	20.655	197.545
Vitvi14g01922	2.494	1.31832	0.000383171	0.00276173	up	2.79	2.66	7.24	7.94	2.725	7.59
Vitvi14g01929	2.45	1.29249	7.75958e-08	1.71778e-06	up	39.87	47.94	80.01	132.52	43.905	106.265
Vitvi14g01938	2.31	1.20774	0.00102849	0.00629615	down	9.37	11.48	32.48	15.41	10.425	23.945
Vitvi14g01967	3.54	1.8237	0.000165437	0.00136919	down	2.64	1.11	7.43	5.54	1.875	6.485
Vitvi14g01973	0.495	-1.0147	1.09359e-19	1.73346e-17	up	160.3	148.98	74.19	76.22	154.64	75.205
Vitvi14g02013	0.437	-1.19307	3.8592e-11	1.75738e-09	down	113.01	98.6	49.92	41.24	105.805	45.58
Vitvi14g02412	7.891	2.98016	1.25965e-06	2.04828e-05	up	0.41	0.73	5.03	3.89	0.57	4.46
Vitvi14g02461	4.694	2.23071	2.12097e-12	1.20333e-10	down	4.65	8.2	25.85	33.87	6.425	29.86
Vitvi14g02510	2.876	1.52413	1.18172e-07	2.49882e-06	up	34.01	58.95	147.52	119.87	46.48	133.695
Vitvi14g02545	3.584	1.84164	0.00040549	0.00290245	down	2.98	2.48	6.49	13.26	2.73	9.875
Vitvi14g02546	7.258	2.85959	4.85632e-12	2.58568e-10	down	3.76	3.15	17.46	32.49	3.455	24.975
Vitvi14g02589	0.4	-1.32295	5.97022e-06	7.90636e-05	up	7.69	6.14	2.48	3.24	6.915	2.86
Vitvi14g02594	0.448	-1.15945	1.10938e-10	4.56162e-09	up	14.76	16.24	8.3	10.93	15.5	9.615
Vitvi14g02611	0.49	-1.03008	1.18829e-09	3.96702e-08	up	9.8	10.79	4.36	5.26	10.295	4.81
Vitvi14g02659	2.432	1.28237	2.25547e-09	7.16127e-08	up	23.58	34.68	64.99	74.61	29.13	69.8
Vitvi14g02665	0.146	-2.78015	4.45264e-35	2.00998e-32	up	60.98	54.34	7.07	9.9	57.66	8.485
Vitvi14g02675	17.876	4.15999	0.00258182	0.0135008	down	0.3	1.92	36.71	1.98	1.11	19.345
Vitvi14g02707	0.454	-1.14025	9.69533e-08	2.09059e-06	down	5.7	8.37	2.22	3.43	7.035	2.825
Vitvi14g02876	3.296	1.7207	2.36686e-23	5.40086e-21	up	162.1	213.49	553.39	698.22	187.795	625.805
Vitvi14g02893	2.523	1.33488	5.49646e-06	7.40169e-05	up	32.72	31.69	96.93	69.06	32.205	82.995
Vitvi14g02936	4.332	2.11499	4.24999e-07	7.83061e-06	up	5.38	9.18	23.81	39.28	7.28	31.545
Vitvi14g02952	2.277	1.18696	0.00112608	0.00680135	up	21.91	44.54	81.35	71.63	33.225	76.49
Vitvi14g02987	0.426	-1.23066	2.72816e-06	3.99509e-05	up	15.07	11.14	5.49	5.84	13.105	5.665
Vitvi14g02997	0.478	-1.06616	3.92602e-05	0.000402388	down	15.76	13.44	5.36	8.39	14.6	6.875
Vitvi14g03008	0.143	-2.80864	0.00617249	0.0273754	down	2.94	8.56	0.34	1.31	5.75	0.825
Vitvi14g03036	2.198	1.13616	0.00156682	0.00892101	down	12.45	9.75	16.84	32.31	11.1	24.575
Vitvi14g03041	2.522	1.33447	7.48463e-07	1.29085e-05	up	9.56	14.53	33.36	26.17	12.045	29.765
Vitvi14g03043	2.498	1.32063	0.00503745	0.0232554	down	1.65	3.05	6.83	4.6	2.35	5.715
Vitvi14g03047	2.074	1.05263	5.05255e-10	1.84712e-08	up	15.72	15.54	30.16	31.59	15.63	30.875
Vitvi14g03052	2.205	1.14105	0.000463997	0.00325834	down	14	25.5	46.97	39.13	19.75	43.05
Vitvi14g03078	2.904	1.53805	0.00031237	0.00233911	up	12.64	10.51	44.74	22.21	11.575	33.475
Vitvi14g03118	2.592	1.37424	4.79951e-08	1.11603e-06	up	1.94	2.54	5.54	5.87	2.24	5.705
Vitvi15g00110	2.175	1.12118	0.0031805	0.0159717	up	2.53	3.95	6.52	5.77	3.24	6.145
Vitvi15g00298	2.198	1.13639	1.48365e-10	6.00546e-09	up	96	92.26	230.62	177.08	94.13	203.85
Vitvi15g00307	0.391	-1.3555	0.000352429	0.0025741	down	6.74	8.34	2.93	2.9	7.54	2.915
Vitvi15g00534	2.229	1.15671	0.00233092	0.0123378	down	23.22	40.13	78.82	68.51	31.675	73.665
Vitvi15g00547	3.144	1.65263	3.24953e-20	5.35528e-18	down	31.15	38.38	109.46	109.37	34.765	109.415
Vitvi15g00597	6.376	2.67257	0.000779503	0.00500816	up	3.91	12.67	60.23	42.91	8.29	51.57
Vitvi15g00650	0.468	-1.09403	2.55e-16	2.70156e-14	up	12.59	12.7	5.58	6.11	12.645	5.845
Vitvi15g00788	2.261	1.17726	0.000826753	0.00525805	up	9.04	15.18	33.25	20.14	12.11	26.695
Vitvi15g00835	0.274	-1.86743	1.35491e-11	6.65125e-10	up	38.33	35.66	12.21	8.49	36.995	10.35
Vitvi15g00864	0.465	-1.10601	1.34696e-17	1.63565e-15	up	27.89	24.92	11.39	12.7	26.405	12.045
Vitvi15g00875	0.464	-1.10899	2.03535e-09	6.50215e-08	up	35.39	42.25	16.41	19.59	38.82	18
Vitvi15g00956	2.654	1.40826	2.02855e-05	0.000225739	up	4.44	5.32	14.15	12.12	4.88	13.135
Vitvi15g00974	0.491	-1.02481	1.8867e-11	9.06881e-10	up	14.98	16.66	8.04	7.2	15.82	7.62
Vitvi15g00996	0.455	-1.13572	0.00292641	0.0149537	up	3.85	4.86	1.71	1.96	4.355	1.835
Vitvi15g01006	3.535	1.82151	0.00851331	0.0353188	down	7.04	1.3	14.27	15.34	4.17	14.805
Vitvi15g01026	2.246	1.16755	6.31115e-07	1.11438e-05	up	48.95	53.57	138.35	89.61	51.26	113.98
Vitvi15g01034	2.942	1.55659	2.1862e-59	3.02644e-56	up	65.19	62.21	180.31	186.37	63.7	183.34
Vitvi15g01035	2.123	1.08584	1.62178e-05	0.000184781	up	31.68	23.24	64.23	51.15	27.46	57.69
Vitvi15g01093	4.185	2.06536	0.00633559	0.0279674	down	4.36	7.33	34.4	13.09	5.845	23.745
Vitvi15g01168	0.427	-1.22604	5.29809e-25	1.34164e-22	up	69.86	69.13	27.38	31.68	69.495	29.53
Vitvi15g01467	2.313	1.20983	1.23188e-09	4.0928e-08	down	16.95	21.46	45.07	42.62	19.205	43.845
Vitvi15g01473	3.266	1.70759	0.0109497	0.0428921	down	2.15	2.54	8.26	7.3	2.345	7.78
Vitvi15g01494	2.778	1.47386	0.000285836	0.00217413	down	10.59	20.27	48.06	38.65	15.43	43.355
Vitvi15g01495	4.203	2.07145	0.000498847	0.00345185	up	68.39	179.56	593.29	473.81	123.975	533.55
Vitvi15g01557	0.454	-1.13789	2.57909e-11	1.21993e-09	down	27.88	31.34	11.44	14.1	29.61	12.77
Vitvi15g01565	0.478	-1.06588	0.000312592	0.00233994	down	11.54	10.44	4.13	6.23	10.99	5.18
Vitvi15g01606	0.237	-2.07599	4.17453e-07	7.71898e-06	up	4.9	7.04	1.53	1.58	5.97	1.555
Vitvi15g01621	2.958	1.56445	0.00885431	0.0363863	up	1.29	2.93	5.65	6.87	2.11	6.26
Vitvi16g00017	0.498	-1.00501	0.0105679	0.0416681	up	5.15	6.03	2.85	2.37	5.59	2.61
Vitvi16g00097	0.424	-1.23825	4.93691e-19	7.27056e-17	up	53.46	50.18	20.86	23.57	51.82	22.215
Vitvi16g00204	0.394	-1.34267	0.00828803	0.0345237	up	17.88	15.87	8.32	5.3	16.875	6.81
Vitvi16g00623	0.433	-1.20594	0.00646522	0.0284128	down	9.88	11.82	3.77	5.61	10.85	4.69
Vitvi16g00630	0.44	-1.18388	4.87951e-05	0.000482491	up	5.34	5.29	1.83	2.78	5.315	2.305
Vitvi16g00681	7.891	2.98024	1.11334e-78	2.88982e-75	up	76.16	83.75	690.87	571.58	79.955	631.225
Vitvi16g00715	2.057	1.04041	0.000517763	0.00356359	up	2.88	2.61	5.46	5.64	2.745	5.55
Vitvi16g00814	2.631	1.39554	0.00106749	0.00649092	up	1.27	1.81	5.01	3.07	1.54	4.04
Vitvi16g00815	2.063	1.04495	0.000123828	0.00106427	down	3.66	5.23	10.23	8.09	4.445	9.16
Vitvi16g00925	0.416	-1.266	0.000166834	0.00137965	down	114.78	58.83	23.28	36.94	86.805	30.11
Vitvi16g01103	26.551	4.73067	8.32534e-71	1.5716e-67	down	1.39	2.06	51.22	38.53	1.725	44.875
Vitvi16g01126	0.489	-1.03276	1.79785e-05	0.000202346	up	11.96	11.83	4.96	6.78	11.895	5.87
Vitvi16g01136	2.089	1.06305	5.80626e-31	2.00945e-28	down	195.35	198.8	393.74	419.49	197.075	406.615
Vitvi16g01141	0.4	-1.32088	5.04825e-19	7.38218e-17	down	42.22	45.8	16.05	18.59	44.01	17.32
Vitvi16g01163	2.1	1.07011	1.85553e-11	8.96048e-10	down	24.53	30.04	50.91	61.44	27.285	56.175
Vitvi16g01166	0.402	-1.31517	1.29469e-06	2.09868e-05	down	13.8	21.24	8.63	10.4	17.52	9.515
Vitvi16g01246	0.255	-1.96985	0.00728861	0.0312767	down	7.27	6.27	0.89	2.72	6.77	1.805
Vitvi16g01340	0.494	-1.01859	4.15318e-10	1.54277e-08	up	23.8	25.58	12.4	11.49	24.69	11.945
Vitvi16g01344	2.128	1.08981	0.000465016	0.00326438	up	4.87	3.12	9.16	7.48	3.995	8.32
Vitvi16g01352	3.056	1.61187	1.79621e-07	3.62119e-06	down	5.33	7.14	20.76	16.88	6.235	18.82
Vitvi16g01359	3.471	1.79528	0.0108285	0.0425215	up	19.83	25.78	112.71	43.25	22.805	77.98
Vitvi16g01381	2.392	1.25804	3.4797e-12	1.87678e-10	up	108.47	138.28	320.51	272.52	123.375	296.515
Vitvi16g01389	0.476	-1.07074	1.18717e-13	8.13583e-12	down	115.39	96.79	48.41	52.47	106.09	50.44
Vitvi16g01536	3.161	1.66034	0.00682094	0.0297369	up	8.12	19.69	63.24	25.1	13.905	44.17
Vitvi16g01599	0.392	-1.34965	3.51579e-10	1.33465e-08	down	19.14	17.27	6.12	5.63	18.205	5.875
Vitvi16g01641	2.804	1.48758	0.00120318	0.007169	up	3.1	3.81	11.62	7.6	3.455	9.61
Vitvi16g01646	3.072	1.61924	0.00109698	0.0066527	down	8.77	15.41	52.24	20.43	12.09	36.335
Vitvi16g01874	0.435	-1.20156	5.65928e-09	1.63442e-07	up	6.83	7.27	2.87	3.47	7.05	3.17
Vitvi16g01923	5.251	2.39255	5.4436e-29	1.71267e-26	down	37.29	49.97	253.84	202.44	43.63	228.14
Vitvi16g01927	2.106	1.0745	3.17973e-05	0.00033263	down	85.04	121.92	256.77	174.88	103.48	215.825
Vitvi16g01967	0.499	-1.00267	3.13315e-05	0.000328742	down	6.87	9.04	3.61	4.58	7.955	4.095
Vitvi16g01974	0.347	-1.52585	5.11425e-14	3.79276e-12	up	7.7	8.51	3.2	2.78	8.105	2.99
Vitvi16g01979	2.34	1.22679	1.43304e-05	0.000166614	up	31.32	27.68	81.79	58.46	29.5	70.125
Vitvi16g02027	0.459	-1.12427	0.00387854	0.0187953	up	6.9	4.14	2.41	2.52	5.52	2.465
Vitvi17g00037	0.476	-1.07187	4.69725e-07	8.59369e-06	up	26.07	24.19	10.05	13.59	25.13	11.82
Vitvi17g00047	2.261	1.17693	0.000174345	0.0014315	down	3.35	3.58	6.4	8.48	3.465	7.44
Vitvi17g00070	0.141	-2.824	1.33087e-05	0.000156309	up	6.03	4.3	0.4	1.05	5.165	0.725
Vitvi17g00084	0.432	-1.20934	0.000285947	0.00217418	down	8.7	7.79	3.62	3.44	8.245	3.53
Vitvi17g00116	0.412	-1.27821	5.24549e-13	3.27095e-11	up	210.2	157.82	73.09	76.09	184.01	74.59
Vitvi17g00390	2.803	1.4868	0.000216986	0.00172501	up	0.95	1.45	2.55	3.89	1.2	3.22
Vitvi17g00438	2.535	1.34198	0.0119114	0.0458959	down	53.7	111.54	229.41	180.04	82.62	204.725
Vitvi17g00452	0.406	-1.29996	4.1124e-15	3.55808e-13	up	10.67	10.62	4.26	4.56	10.645	4.41
Vitvi17g00477	2.507	1.32576	1.93746e-35	8.9403e-33	up	276.17	389.77	773.54	599.26	332.97	686.4
Vitvi17g00479	0.363	-1.46335	0.00410817	0.0197338	down	5.93	2.83	1.62	1.5	4.38	1.56
Vitvi17g00541	2.132	1.09217	0.00155095	0.00885007	down	1.79	2.18	4.16	4.02	1.985	4.09
Vitvi17g00554	2.37	1.24504	1.15678e-08	3.09942e-07	up	21.72	32.12	63.42	62.21	26.92	62.815
Vitvi17g00615	2.261	1.17695	2.2047e-12	1.24404e-10	down	96.48	80.45	181.34	217.18	88.465	199.26
Vitvi17g00643	0.485	-1.04327	2.32095e-09	7.34387e-08	down	21.18	22.06	9.75	10.76	21.62	10.255
Vitvi17g00649	2.004	1.00254	0.0012884	0.00760481	up	6.72	8.98	15.46	15.76	7.85	15.61
Vitvi17g00678	0.496	-1.01132	6.67827e-05	0.000631774	down	13.26	11.49	5.7	6.35	12.375	6.025
Vitvi17g00695	4.325	2.11285	1.41006e-40	7.9135e-38	down	46.04	54.32	234.37	197.97	50.18	216.17
Vitvi17g00732	3.993	1.99763	2.50328e-17	2.98464e-15	down	6.18	8.58	28.95	29.14	7.38	29.045
Vitvi17g00770	0.209	-2.25717	0.00140314	0.00816825	up	3.49	3.84	0.3	1.28	3.665	0.79
Vitvi17g00787	2.954	1.56289	0.000508012	0.00350694	up	2.43	6.59	14.6	11.4	4.51	13
Vitvi17g00819	2.617	1.38774	0.00777301	0.032853	down	58.62	44.99	174.09	90.75	51.805	132.42
Vitvi17g00837	2.136	1.0949	0.00204661	0.0110712	up	4.96	7.47	13.61	10.35	6.215	11.98
Vitvi17g00885	2.07	1.04938	0.00588251	0.026371	down	1.42	2.17	3.28	4.02	1.795	3.65
Vitvi17g00899	2.22	1.1506	9.94875e-18	1.24449e-15	up	117.09	142.15	278.87	293.06	129.62	285.965
Vitvi17g00930	2.045	1.03185	7.91138e-07	1.35656e-05	up	12.75	15.63	29.25	28.18	14.19	28.715
Vitvi17g01038	2.116	1.08166	1.37468e-09	4.52381e-08	up	22.46	25.1	49.46	47.06	23.78	48.26
Vitvi17g01086	0.494	-1.01823	3.39164e-11	1.55469e-09	down	159.03	138.16	64.27	80.02	148.595	72.145
Vitvi17g01089	2.228	1.15544	0.00108428	0.00658334	up	6.23	7.72	19.7	11.48	6.975	15.59
Vitvi17g01221	0.472	-1.08389	0.000713422	0.00465856	down	6.75	5.1	2.17	3.3	5.925	2.735
Vitvi17g01249	2.514	1.32976	0.000149855	0.00125778	up	3.67	8.02	21.03	25.69	5.845	23.36
Vitvi17g01327	3.381	1.75735	4.83755e-06	6.60867e-05	up	16.92	26.18	93.49	52.69	21.55	73.09
Vitvi17g01328	2.158	1.11001	9.44387e-07	1.59174e-05	down	30.31	39.04	76.24	75.5	34.675	75.87
Vitvi17g01381	2.922	1.54679	0.00970266	0.0390306	up	1.03	2.65	6.89	3.67	1.84	5.28
Vitvi17g01386	0.459	-1.12192	0.00143484	0.00831319	up	5.23	5.51	2.23	2.33	5.37	2.28
Vitvi17g01398	0.49	-1.02882	2.02313e-05	0.000225256	up	10.4	8.31	3.84	4.26	9.355	4.05
Vitvi17g01492	0.163	-2.61733	0.000157967	0.0013147	up	5.01	10.06	1.79	0.62	7.535	1.205
Vitvi17g01520	2.971	1.571	8.9564e-10	3.06392e-08	up	2.88	3.25	9.35	8.53	3.065	8.94
Vitvi17g01554	0.465	-1.10344	0.000818859	0.00521509	up	21.94	23.15	8.13	12.9	22.545	10.515
Vitvi17g01571	2.815	1.49306	0.000334394	0.00247194	up	2.54	2.55	8.99	5.02	2.545	7.005
Vitvi18g00001	0.47	-1.08846	3.54696e-14	2.66857e-12	down	24.63	24.94	13.97	15.04	24.785	14.505
Vitvi18g00020	5.94	2.57049	0.00117805	0.00704769	up	9.3	29.12	134.24	89.26	19.21	111.75
Vitvi18g00040	2.076	1.05382	0.000387251	0.0027863	down	11.5	13.08	19.59	31.15	12.29	25.37
Vitvi18g00070	2.382	1.2521	9.16675e-05	0.000829401	up	6.05	9.44	14.53	21.87	7.745	18.2
Vitvi18g00086	0.371	-1.43141	2.03391e-16	2.1883e-14	up	14.64	20.55	4.23	5.2	17.595	4.715
Vitvi18g00087	0.222	-2.16924	2.39432e-15	2.19991e-13	up	36.18	24.7	8.44	4.25	30.44	6.345
Vitvi18g00095	2.444	1.28921	9.58981e-13	5.7058e-11	up	39.44	49.31	115.48	97.79	44.375	106.635
Vitvi18g00119	0.345	-1.53597	9.03069e-14	6.35669e-12	down	30.39	24.9	7.91	9.98	27.645	8.945
Vitvi18g00151	2.173	1.11942	5.81205e-05	0.000561597	down	8.39	10.1	21.04	19.14	9.245	20.09
Vitvi18g00189	0.366	-1.45051	3.3123e-07	6.20758e-06	down	33.7	30.3	13.97	9.07	32	11.52
Vitvi18g00190	0.335	-1.57735	2.08724e-13	1.36724e-11	up	22.37	22.07	7.31	7.39	22.22	7.35
Vitvi18g00206	2.436	1.28462	0.000128358	0.00109597	down	17.4	17.26	49.55	36.42	17.33	42.985
Vitvi18g00230	0.466	-1.10068	1.05654e-16	1.17321e-14	up	25.74	24.35	10.12	11.53	25.045	10.825
Vitvi18g00250	2.034	1.02429	7.66426e-05	0.000710801	down	76.55	115.65	239.9	161.51	96.1	200.705
Vitvi18g00268	3.979	1.99254	5.20732e-12	2.75842e-10	up	16.11	13.02	61.73	56.22	14.565	58.975
Vitvi18g00291	0.25	-2.00093	1.17453e-19	1.84766e-17	up	49.89	38.57	10.65	11.19	44.23	10.92
Vitvi18g00310	0.291	-1.78163	4.04867e-26	1.08993e-23	up	82.07	74.25	24.21	20.41	78.16	22.31
Vitvi18g00317	0.49	-1.02906	0.000266724	0.00204903	down	7.01	6.54	2.45	3.76	6.775	3.105
Vitvi18g00338	2.026	1.01869	0.0017088	0.0095797	down	4.43	6.49	11.6	10.27	5.46	10.935
Vitvi18g00363	0.417	-1.2607	4.92247e-05	0.000486275	up	12.59	8.19	3.84	5.06	10.39	4.45
Vitvi18g00405	2.099	1.06972	4.97133e-06	6.77804e-05	down	16.82	14.3	33.66	31.23	15.56	32.445
Vitvi18g00474	0.33	-1.60114	1.10472e-05	0.000132829	up	18.37	12.93	5.07	5.2	15.65	5.135
Vitvi18g00479	2.546	1.3481	0.000125682	0.00107887	down	2.81	4.43	9.93	8.15	3.62	9.04
Vitvi18g00491	0.434	-1.20576	6.50266e-27	1.9018e-24	down	106.46	103.95	43.51	46.21	105.205	44.86
Vitvi18g00501	2.707	1.43655	9.0191e-07	1.52634e-05	up	3.96	3.26	9.97	9.68	3.61	9.825
Vitvi18g00502	0.417	-1.2626	6.40566e-16	6.45696e-14	down	19.24	19.38	10.6	11.01	19.31	10.805
Vitvi18g00508	2.014	1.00995	0.010261	0.0408081	up	9.69	20.31	36.04	23	15	29.52
Vitvi18g00513	0.455	-1.13705	0.00158938	0.00903212	up	30.75	25.53	9.96	16.98	28.14	13.47
Vitvi18g00542	13.309	3.73435	1.47621e-09	4.82733e-08	down	5.07	12.36	131.5	97.54	8.715	114.52
Vitvi18g00543	2.045	1.03189	3.11675e-11	1.43502e-09	down	19	17.7	38.09	34.94	18.35	36.515
Vitvi18g00551	2.981	1.57559	0.000257536	0.00199023	down	3.08	3.74	10.68	8.05	3.41	9.365
Vitvi18g00585	0.489	-1.03223	0.00129542	0.00764184	up	27.98	31.45	11.79	17.62	29.715	14.705
Vitvi18g00614	0.434	-1.20424	0.000398558	0.00285874	down	10.6	12.78	5.73	4.33	11.69	5.03
Vitvi18g00635	3.266	1.70735	3.30778e-05	0.000345156	up	7	7.45	25.9	22.23	7.225	24.065
Vitvi18g00683	0.443	-1.17533	1.22859e-26	3.49475e-24	down	183.8	168.66	76.12	77	176.23	76.56
Vitvi18g00765	0.411	-1.28369	0.00742625	0.0317301	up	22.13	29.54	7.34	14.49	25.835	10.915
Vitvi18g00858	2.083	1.05832	6.46479e-08	1.46552e-06	down	13.63	16.72	29.21	33.13	15.175	31.17
Vitvi18g00905	2.797	1.48371	0.000244927	0.00190984	up	4.71	9.1	21.98	16.03	6.905	19.005
Vitvi18g00936	0.491	-1.02727	1.07278e-10	4.42868e-09	down	22.27	21.74	9.64	11.43	22.005	10.535
Vitvi18g01057	2.129	1.08998	3.66883e-05	0.000379398	up	32.02	46.39	97.23	65.94	39.205	81.585
Vitvi18g01110	2.147	1.10209	0.00176343	0.00982149	down	3.27	4.48	6.25	10	3.875	8.125
Vitvi18g01133	2.567	1.36036	2.05248e-20	3.52229e-18	up	112.19	108.52	302.33	251.76	110.355	277.045
Vitvi18g01185	6.353	2.66738	0.000151547	0.00127044	up	0.57	3.06	4.97	5.94	1.815	5.455
Vitvi18g01202	2.279	1.1885	8.08787e-12	4.1264e-10	up	47.08	38.68	96.67	97.39	42.88	97.03
Vitvi18g01203	3.527	1.81824	6.0521e-05	0.000579543	down	2.01	3.83	10.78	9.38	2.92	10.08
Vitvi18g01231	2.751	1.4601	3.67726e-13	2.37138e-11	down	34.56	47.93	98.96	124.83	41.245	111.895
Vitvi18g01512	0.357	-1.48403	2.72202e-23	6.14377e-21	up	42.22	42.86	13.45	12.84	42.54	13.145
Vitvi18g01711	69.399	6.11684	0.000184841	0.00150518	down	0.05	0	1.73	1.73	0.025	1.73
Vitvi18g01871	0.407	-1.2966	8.5318e-14	6.04651e-12	down	5.75	5.79	2.4	2.48	5.77	2.44
Vitvi18g01916	2.576	1.36519	4.65377e-05	0.000462592	up	1.27	1.93	4.61	3.44	1.6	4.025
Vitvi18g01938	0.32	-1.64533	3.75759e-08	8.98596e-07	up	8.36	11.79	2.67	2.58	10.075	2.625
Vitvi18g02014	2.032	1.02298	0.00273947	0.0141717	up	3.72	6.03	9.93	9.56	4.875	9.745
Vitvi18g02023	0.365	-1.4526	1.15862e-11	5.71464e-10	down	10.21	11.74	4.51	3.72	10.975	4.115
Vitvi18g02024	0.397	-1.33114	0.000119236	0.00103036	up	9.01	5.35	5.53	1.98	7.18	3.755
Vitvi18g02066	2.095	1.06679	2.37744e-15	2.19411e-13	up	29.98	26.35	55.91	59.9	28.165	57.905
Vitvi18g02124	2.204	1.14027	5.04987e-08	1.16771e-06	up	18.06	25.11	48.06	45.52	21.585	46.79
Vitvi18g02139	4.13	2.04621	0.00360005	0.0176351	up	0.41	1.8	5.09	3.83	1.105	4.46
Vitvi18g02223	0.473	-1.07936	1.06823e-14	8.80226e-13	up	32.08	35.34	17.26	16.61	33.71	16.935
Vitvi18g02244	2.201	1.13797	2.25476e-07	4.38801e-06	up	55.9	83.85	158.99	147.72	69.875	153.355
Vitvi18g02302	2.096	1.06769	0.00601494	0.0268199	up	3.98	3.47	8.79	8.56	3.725	8.675
Vitvi18g02308	0.421	-1.24766	7.76461e-13	4.68896e-11	down	11.72	10.8	4.2	5.3	11.26	4.75
Vitvi18g02398	0.262	-1.93421	8.26621e-07	1.41274e-05	up	29.18	44.73	11.84	7.49	36.955	9.665
Vitvi18g02408	2.422	1.27621	3.31276e-15	2.91481e-13	down	98.74	80.9	200.97	231.14	89.82	216.055
Vitvi18g02423	3.153	1.65692	6.1052e-16	6.24505e-14	up	36.57	48.52	145.38	121.31	42.545	133.345
Vitvi18g02468	2.828	1.49957	0.000255873	0.00197811	down	14.99	32.54	82.61	49.92	23.765	66.265
Vitvi18g02476	4.439	2.15018	2.71939e-11	1.27467e-09	up	7.02	13.15	49.38	38.43	10.085	43.905
Vitvi18g02518	3.088	1.62686	0.00757795	0.0321728	down	11.91	6.43	33.26	28.28	9.17	30.77
Vitvi18g02526	2.702	1.43421	7.66146e-10	2.66037e-08	down	7.36	10.25	27.67	23.09	8.805	25.38
Vitvi18g02555	0.496	-1.01097	9.76586e-09	2.6753e-07	up	169.48	154.78	67.9	91.99	162.13	79.945
Vitvi18g02571	2.185	1.12759	0.000109569	0.000963748	up	9.39	15.78	29.69	24.12	12.585	26.905
Vitvi18g02638	0.423	-1.24116	0.000960307	0.00595781	up	11.7	9.32	4.59	4.22	10.51	4.405
Vitvi18g02690	0.307	-1.70311	3.57714e-09	1.07807e-07	down	13.23	11.92	3.69	3.94	12.575	3.815
Vitvi18g02718	3.814	1.93135	1.45895e-05	0.000168869	up	1.54	1.62	7.36	4.5	1.58	5.93
Vitvi18g02730	0.464	-1.10636	4.05882e-10	1.51313e-08	up	38.04	34.65	16.25	17.11	36.345	16.68
Vitvi18g02749	4.015	2.00528	0.00133017	0.00781137	up	1.75	2.96	12.45	6.33	2.355	9.39
Vitvi18g02812	2.023	1.01615	0.000341941	0.00251876	down	8.7	14.35	23.04	22.8	11.525	22.92
Vitvi18g02824	3.458	1.79	5.76243e-07	1.0271e-05	down	9.29	18.35	55.69	37.92	13.82	46.805
Vitvi18g02896	6.702	2.74469	0.00531072	0.0242708	up	0.33	0.76	6.28	0.73	0.545	3.505
Vitvi18g02906	3.499	1.80674	0.00248563	0.0130551	up	13.57	31.07	86.13	66.18	22.32	76.155
Vitvi18g02927	2.604	1.3809	0.00419496	0.0200757	up	1.64	3.89	5.46	8.72	2.765	7.09
Vitvi18g02985	4.01	2.00358	0.00596383	0.0266435	up	2.16	3.86	11.43	13.51	3.01	12.47
Vitvi18g02991	2.384	1.25365	1.40817e-06	2.25623e-05	up	42.96	54.33	102.6	138.85	48.645	120.725
Vitvi18g02996	0.407	-1.29668	3.59337e-09	1.0814e-07	up	24.1	23.69	8.07	11.11	23.895	9.59
Vitvi18g03021	5.485	2.45551	8.90064e-07	1.50752e-05	up	0.64	1.51	6.41	5	1.075	5.705
Vitvi18g03040	4.054	2.01941	4.67327e-09	1.37257e-07	down	3.14	4.6	11.51	19.63	3.87	15.57
Vitvi18g03041	2.307	1.20586	0.00792983	0.0333731	up	3.86	4.11	8.12	11.12	3.985	9.62
Vitvi18g03077	5.52	2.46476	0.000185575	0.00151005	down	1.08	1.09	5.72	6.13	1.085	5.925
Vitvi18g03084	0.425	-1.23553	0.00147677	0.00848744	down	9.77	9.66	4.56	3.62	9.715	4.09
Vitvi18g03087	0.394	-1.34455	9.31598e-12	4.68393e-10	up	16.86	13.52	13.76	13.51	15.19	13.635
Vitvi18g03091	0.212	-2.23846	5.76865e-06	7.68351e-05	down	3.85	5.64	0.96	1.03	4.745	0.995
Vitvi18g03096	0.354	-1.49968	3.3472e-15	2.93268e-13	up	289.05	224.47	91.15	101.68	256.76	96.415
Vitvi18g03162	2.654	1.40823	3.72171e-08	8.91364e-07	up	18.18	31.49	62.19	68.58	24.835	65.385
Vitvi18g03218	0.474	-1.07585	3.25287e-06	4.69253e-05	up	5.02	6.41	2.43	2.38	5.715	2.405
Vitvi18g03242	0.236	-2.08551	1.53293e-10	6.19286e-09	up	5.82	8.41	1.64	2.06	7.115	1.85
Vitvi18g03265	2.41	1.26882	0.000287949	0.002187	up	2.98	3.24	7.12	7.71	3.11	7.415
Vitvi19g00100	2.241	1.16394	1.15347e-15	1.11925e-13	up	45.44	48.47	100.61	109.23	46.955	104.92
Vitvi19g00125	0.475	-1.0738	7.76789e-13	4.68896e-11	up	104.84	94.27	41.87	51.33	99.555	46.6
Vitvi19g00138	2.859	1.51544	1.75633e-15	1.65773e-13	up	20.54	25.61	70.18	57.93	23.075	64.055
Vitvi19g00141	0.405	-1.30314	0.00299393	0.0152114	down	12.8	7.5	3.98	4.24	10.15	4.11
Vitvi19g00164	0.366	-1.44817	6.69645e-07	1.17146e-05	up	18.28	14.2	4.89	6.87	16.24	5.88
Vitvi19g00223	2.127	1.08873	0.00182185	0.010064	up	28.79	43.06	75.96	86.85	35.925	81.405
Vitvi19g00233	0.441	-1.17972	6.09604e-06	8.05756e-05	up	20.3	14.03	6.3	8.6	17.165	7.45
Vitvi19g00287	2.11	1.07746	1.74753e-11	8.49826e-10	up	97.18	85.63	185.66	212.53	91.405	199.095
Vitvi19g00376	2.139	1.09705	1.72651e-06	2.69353e-05	down	22.99	32.96	59.48	59.46	27.975	59.47
Vitvi19g00405	0.246	-2.02407	4.42091e-07	8.11673e-06	down	28.49	16.99	5.51	5.5	22.74	5.505
Vitvi19g00410	0.343	-1.54188	0.000498868	0.00345185	down	10.31	5.74	2	3.45	8.025	2.725
Vitvi19g00445	0.476	-1.07009	0.00256974	0.0134444	down	8.24	8.04	3.98	3.67	8.14	3.825
Vitvi19g00494	5.589	2.48265	3.43891e-05	0.000357939	up	1.1	1.26	5.32	7.83	1.18	6.575
Vitvi19g00498	2.83	1.50059	6.10612e-45	4.37219e-42	down	340.3	373.02	1024.61	991.4	356.66	1008
Vitvi19g00505	3.457	1.7894	1.7535e-12	1.01143e-10	down	8.37	8.9	32.89	24.06	8.635	28.475
Vitvi19g00554	0.17	-2.55517	0.000809953	0.00517179	up	16.37	9.25	1	3.5	12.81	2.25
Vitvi19g00567	2.71	1.43827	2.9633e-16	3.10772e-14	up	11.01	12.19	31.38	30.45	11.6	30.915
Vitvi19g00636	2.499	1.32148	3.70508e-08	8.88406e-07	down	72.61	119.54	312.72	239.01	96.075	275.865
Vitvi19g00641	2.722	1.44446	0.00122212	0.00726517	up	50.75	83.57	209.72	149.89	67.16	179.805
Vitvi19g00654	2.168	1.11648	4.24286e-06	5.90726e-05	down	28.9	43.7	85.32	69.89	36.3	77.605
Vitvi19g00728	0.492	-1.02245	2.6634e-06	3.91128e-05	down	15.73	13.9	6.19	8.15	14.815	7.17
Vitvi19g00750	3.19	1.6734	1.00454e-09	3.39174e-08	up	7.83	9.43	21.57	32.95	8.63	27.26
Vitvi19g01021	6.618	2.72647	4.86284e-25	1.24663e-22	down	6.07	8.53	53.02	44.85	7.3	48.935
Vitvi19g01048	2.616	1.38721	0.000509519	0.00351501	up	5.27	3.73	16.36	10.31	4.5	13.335
Vitvi19g01326	2.915	1.54373	2.2408e-39	1.19308e-36	up	124.83	115.55	337.98	358.32	120.19	348.15
Vitvi19g01419	0.4	-1.32271	0.00102051	0.00625468	up	23.77	25.95	10.95	9.47	24.86	10.21
Vitvi19g01498	0.46	-1.12106	0.000351647	0.00257111	down	5.55	7.1	2.76	2.68	6.325	2.72
Vitvi19g01577	0.347	-1.5271	9.12722e-20	1.4579e-17	down	41.77	46.28	20.87	25.11	44.025	22.99
Vitvi19g01715	2.542	1.34577	0.00181665	0.0100486	down	3.63	9.73	18.34	15.57	6.68	16.955
Vitvi19g01760	36.529	5.19098	6.16924e-18	7.90767e-16	up	0.4	0.88	29.53	16.84	0.64	23.185
Vitvi19g01772	2.155	1.10784	0.000790423	0.00506891	up	3.6	4.04	7.67	8.59	3.82	8.13
Vitvi19g01827	0.273	-1.87295	0.000340568	0.00251044	up	10.58	14.91	3.87	3.1	12.745	3.485
Vitvi19g01864	0.313	-1.67574	4.55886e-10	1.68143e-08	down	13.12	11.49	3.79	3.77	12.305	3.78
Vitvi19g01875	3.688	1.8829	2.96101e-07	5.61511e-06	up	5.58	9.95	26.24	30.99	7.765	28.615
Vitvi19g02002	0.443	-1.17433	0.000114889	0.00100028	up	14.69	11.83	5.3	6.14	13.26	5.72
Vitvi19g02006	139.266	7.1217	4.58764e-05	0.000456893	up	0	0.02	5.05	5.8	0.01	5.425
Vitvi19g02038	5.805	2.53719	0.00206381	0.0111428	up	3.62	1.67	5.38	25.97	2.645	15.675
Vitvi19g02064	2.386	1.25439	2.51221e-06	3.70235e-05	down	17.96	20.45	35.26	55.89	19.205	45.575
Vitvi19g02150	7.815	2.9663	1.24911e-05	0.000147878	up	10.07	27.97	164.99	128.96	19.02	146.975
Vitvi19g02185	0.259	-1.94994	7.5579e-14	5.46829e-12	up	4.34	6.48	1.66	1.99	5.41	1.825
Vitvi19g02189	9.937	3.31287	2.61064e-07	5.00553e-06	up	5.68	15.51	106.65	100.79	10.595	103.72
Vitvi19g02192	7.516	2.90989	1.87623e-07	3.75337e-06	up	27.45	61.93	360.85	301.86	44.69	331.355
Vitvi19g02275	0.22	-2.1819	2.68274e-17	3.14729e-15	down	5.91	8.01	3.04	2.64	6.96	2.84
Vitvi19g02290	0.425	-1.23315	2.66969e-10	1.04399e-08	down	13.78	14.44	5.49	6.46	14.11	5.975
Vitvi19g02291	0.337	-1.56995	0.00032858	0.00243802	down	4.37	7.73	3.38	2.85	6.05	3.115
Vitvi19g02329	0.468	-1.09447	5.92772e-05	0.000569857	up	7.15	9.82	5.81	7.2	8.485	6.505
Vitvi19g02374	6.585	2.71916	3.05217e-05	0.000321391	up	1.19	5.58	18.62	25.84	3.385	22.23
Vitvi03g01300	0.443	-1.17488	0.00739994	0.0316498	up	6.49	4.99	2.74	2.29	5.74	2.515
Vitvi16g00772	0.386	-1.37199	0.00333671	0.0166275	up	5.43	7.26	3.1	1.72	6.345	2.41
Vitvi14g01526	0.494	-1.01742	3.21906e-06	4.6581e-05	down	10.8	8.31	4.87	7.6	9.555	6.235
Vitvi11g00228	2.414	1.27118	0.000306553	0.00230461	down	13.39	23.99	54.18	33.91	18.69	44.045
Vitvi01g00302	2.288	1.19427	0.000547141	0.00372138	up	20.46	17.83	57.3	28.33	19.145	42.815
Vitvi08g00107	2.354	1.23501	3.59327e-05	0.000372699	down	11.59	17.89	26.16	42.29	14.74	34.225
Vitvi18g00843	3.14	1.65097	7.88134e-10	2.72306e-08	up	10.61	9.35	31.27	31.43	9.98	31.35
Vitvi06g00414	0.461	-1.11852	9.79755e-06	0.000120352	up	16.12	14.01	7.02	7.99	15.065	7.505
Vitvi08g01797	0.495	-1.01306	2.6672e-08	6.6488e-07	up	59.96	49.22	27.24	26.1	54.59	26.67
Vitvi19g01749	3.504	1.80888	1.88072e-06	2.89068e-05	up	1.66	2.2	7.05	6.26	1.93	6.655
Vitvi14g00974	2.182	1.12568	0.0090054	0.0368395	down	1.69	1.74	3.59	3.8	1.715	3.695
Vitvi05g00084	0.309	-1.69325	0.00970897	0.0390349	up	4.72	9.14	1.06	3.31	6.93	2.185
Vitvi11g00099	2.418	1.27411	6.11712e-05	0.000584816	up	5.59	6.22	12.57	16.45	5.905	14.51
Vitvi09g00112	2.571	1.36228	1.1752e-07	2.49011e-06	down	7.48	8.6	21.23	19.68	8.04	20.455
Vitvi18g02298	2.949	1.5604	7.05137e-05	0.000661644	down	3.17	7.29	15.71	14.57	5.23	15.14
Vitvi18g02450	2.263	1.17817	0.00960881	0.0387055	down	6.23	5.77	18.01	8.02	6	13.015
Vitvi19g00391	2.654	1.40827	0.00618979	0.0274404	down	2.44	2.19	3.46	8.79	2.315	6.125
Vitvi12g00563	2.018	1.01295	0.00606017	0.0269694	up	3.28	6.48	9.09	10.27	4.88	9.68

## Sheet: Tables S3
Table S3. The FPKM and fold change of DEGs in the comparison of BN vs. AN
Gene id	FC	Log2FC	Pvalue	Padjust	Regulate	FPKM
						BN_1	BN_3	AN_1	AN_2	AN_3	BN	AN
Vitvi00g01011	2.345	1.22942	5.33875e-21	1.46164e-18	up	19.29	18.56	44.82	50.32	44.77	18.925	46.6367
Vitvi00g01102	3.793	1.92322	8.50392e-11	4.96596e-09	up	2.27	1.86	7.67	7.11	9.85	2.065	8.21
Vitvi00g01302	0.342	-1.54807	1.78542e-09	8.05964e-08	down	16.34	13.49	5.47	4.37	6.28	14.915	5.37333
Vitvi00g01431	0.323	-1.63157	0.00477753	0.0282081	down	5.73	11.8	1.52	5.17	2.19	8.765	2.96
Vitvi00g02157	0.154	-2.69719	8.21584e-06	0.000149567	down	19.71	14.95	2.93	4.68	1.06	17.33	2.89
Vitvi00g02173	0.392	-1.3513	9.14354e-07	2.23096e-05	down	70.01	64.92	31.72	18.25	32.27	67.465	27.4133
Vitvi00g02211	0.489	-1.03182	2.71204e-05	0.000413695	down	6.84	5.44	3.6	3.06	2.75	6.14	3.13667
Vitvi00g02244	0.3	-1.73795	0.00699587	0.0377766	down	3.06	3.43	0.89	0.85	1.16	3.245	0.966667
Vitvi00g02289	0.443	-1.17523	1.40361e-07	4.20307e-06	down	16.39	15.7	8.08	7.56	7.11	16.045	7.58333
Vitvi01g00031	2.19	1.13071	2.70441e-05	0.000413128	up	2.83	3.45	6.81	6.07	8.73	3.14	7.20333
Vitvi01g00103	0.455	-1.13541	2.23676e-12	1.81359e-10	down	46.05	43.3	24.3	18.75	20.6	44.675	21.2167
Vitvi01g00191	0.457	-1.12823	2.8795e-05	0.000434833	down	18.04	17.87	10.48	7.34	8.21	17.955	8.67667
Vitvi01g00224	0.477	-1.06745	1.57009e-06	3.56672e-05	down	9.93	8.49	3.62	5.23	4.93	9.21	4.59333
Vitvi01g00230	2.925	1.54828	3.28915e-08	1.13484e-06	up	3.81	5.07	17.69	11.96	11.17	4.44	13.6067
Vitvi01g00260	2.136	1.09491	1.1465e-05	0.000199747	up	3.72	5.28	13.06	8.82	10.35	4.5	10.7433
Vitvi01g00264	2.263	1.17809	0.0026409	0.0177925	up	1.67	2.17	5.23	4.84	3.64	1.92	4.57
Vitvi01g00280	2.108	1.07615	4.12227e-14	4.52612e-12	up	10.2	10.5	24.09	20.46	23.93	10.35	22.8267
Vitvi01g00286	2.627	1.39351	1.92865e-07	5.60027e-06	up	2.41	2.73	7.45	6.91	6.89	2.57	7.08333
Vitvi01g00302	0.434	-1.2046	5.83234e-06	0.000110469	down	20.46	17.83	11.53	8.02	6.6	19.145	8.71667
Vitvi01g00309	2.782	1.47592	1.47422e-08	5.49082e-07	up	8.44	8.66	29.72	23.37	22.81	8.55	25.3
Vitvi01g00317	0.484	-1.04748	7.61098e-05	0.000993481	down	6.01	8.73	3.51	3.44	4.27	7.37	3.74
Vitvi01g00337	2.696	1.43075	6.80399e-12	4.87874e-10	up	14.42	16.29	50.75	34.87	42.18	15.355	42.6
Vitvi01g00344	0.399	-1.32564	3.07837e-08	1.07265e-06	down	9.22	8.51	3.21	3.71	4.64	8.865	3.85333
Vitvi01g00411	0.438	-1.19181	8.85862e-11	5.14459e-09	down	111.6	103.32	59.34	39.93	48.39	107.46	49.22
Vitvi01g00424	2.746	1.4573	5.76389e-06	0.000109566	up	11.44	14.31	26.49	50.54	35.2	12.875	37.41
Vitvi01g00443	3.594	1.84568	6.83682e-12	4.88566e-10	up	1.22	1.43	5.18	4.53	5.17	1.325	4.96
Vitvi01g00458	3.102	1.63325	0.000122152	0.00147401	up	2.32	2.24	8.9	5.15	8.41	2.28	7.48667
Vitvi01g00467	0.447	-1.16282	1.12141e-05	0.000196023	down	6.85	7.15	3.15	3.15	3.57	7	3.29
Vitvi01g00499	0.419	-1.25583	3.35501e-09	1.41454e-07	down	15.73	14.44	5.56	6.34	7.97	15.085	6.62333
Vitvi01g00554	3.911	1.96742	7.86952e-11	4.64699e-09	up	4.95	3.21	19.53	13.24	18.68	4.08	17.15
Vitvi01g00612	3.574	1.83734	0.00163563	0.012151	up	2.09	0.39	4.41	5.56	4.05	1.24	4.67333
Vitvi01g00621	0.494	-1.0178	0.000740661	0.00643075	down	7	5.75	3.88	2.53	3.51	6.375	3.30667
Vitvi01g00639	4.368	2.12691	1.74532e-06	3.90584e-05	up	1.27	0.75	6.02	3.97	3.92	1.01	4.63667
Vitvi01g00648	2.1	1.0703	0.00117664	0.00933566	up	1.04	1.37	3.18	2.4	2.42	1.205	2.66667
Vitvi01g00714	0.418	-1.25772	7.82136e-05	0.00101763	down	24.32	23.56	15.21	7.04	9.31	23.94	10.52
Vitvi01g00747	2.292	1.19677	1.27743e-05	0.000218406	up	11.44	19.39	45.82	28.12	36.68	15.415	36.8733
Vitvi01g00770	4.148	2.05226	2.73178e-20	6.77514e-18	up	2.3	2.35	11.51	8.71	10.09	2.325	10.1033
Vitvi01g00784	0.131	-2.93209	0.000554482	0.00511555	down	53.92	40.13	12.16	2.34	4.97	47.025	6.49
Vitvi01g00849	2.236	1.16108	1.23304e-05	0.000212194	up	4.25	3.73	11.35	9.15	7.84	3.99	9.44667
Vitvi01g00873	2.047	1.03323	3.06514e-11	1.95215e-09	up	2.92	2.94	6.22	6.19	6.44	2.93	6.28333
Vitvi01g01017	0.269	-1.89183	0.00639871	0.0353118	down	40.81	20.25	15.26	9.47	5.8	30.53	10.1767
Vitvi01g01019	0.102	-3.29736	0.000248052	0.00264367	down	4.43	2.64	0.7	0	0.43	3.535	0.376667
Vitvi01g01038	0.303	-1.72195	5.14005e-12	3.78872e-10	down	683.15	568.21	260.67	138.99	201.22	625.68	200.293
Vitvi01g01257	2.991	1.58065	4.97103e-05	0.00069677	up	1.36	2.31	6.49	11.6	5.3	1.835	7.79667
Vitvi01g01301	0.493	-1.01925	0.00597337	0.0335084	down	7.95	5.13	4.42	2.67	3.07	6.54	3.38667
Vitvi01g01314	2.296	1.1992	0.000341424	0.00344051	up	2.02	1.87	5.16	5.05	3.85	1.945	4.68667
Vitvi01g01357	0.258	-1.9524	5.99278e-13	5.35312e-11	down	80.45	63.45	25.65	13.3	19.58	71.95	19.51
Vitvi01g01380	0.485	-1.04482	6.15713e-08	1.9865e-06	down	15.99	15.55	10.55	9.57	7.78	15.77	9.3
Vitvi01g01473	0.199	-2.33243	0.000155103	0.00180948	down	2.6	5.58	1.16	0.73	0.66	4.09	0.85
Vitvi01g01477	2.197	1.13534	0.00279651	0.0186148	up	1.88	3.05	6.8	4.65	5.63	2.465	5.69333
Vitvi01g01507	4.368	2.12694	1.48968e-20	3.9312e-18	up	1.83	1.58	7.74	7.25	8.51	1.705	7.83333
Vitvi01g01514	2.756	1.46259	1.26817e-05	0.000217175	up	2.97	2.63	10.18	5.98	8.16	2.8	8.10667
Vitvi01g01534	6.522	2.70534	6.66898e-19	1.43458e-16	up	2.05	2.7	20.12	15.17	13.59	2.375	16.2933
Vitvi01g01558	0.267	-1.90381	0.00239929	0.0164915	down	2.99	4.09	1.24	0.65	1.12	3.54	1.00333
Vitvi01g01883	0.332	-1.58969	2.21316e-05	0.000348696	down	33.61	15.05	8.8	7.06	10.52	24.33	8.79333
Vitvi01g01884	0.226	-2.1458	7.84891e-05	0.00102012	down	7.33	4.76	1.79	0.84	2.01	6.045	1.54667
Vitvi01g01958	0.317	-1.65763	0.000821164	0.00700067	down	15.72	8.32	5.57	2.63	3.9	12.02	4.03333
Vitvi01g01960	0.49	-1.02884	0.00194423	0.0140229	down	17.46	13.04	8.6	6.63	8.63	15.25	7.95333
Vitvi01g02031	0.31	-1.69092	0.00160086	0.0119588	down	468.97	298.38	195.21	85.74	106.27	383.675	129.073
Vitvi01g02293	0.459	-1.12447	1.17423e-05	0.000203736	down	47.21	48.98	27.96	15.84	25.93	48.095	23.2433
Vitvi02g00025	5.888	2.55766	5.88014e-18	1.14777e-15	up	10.03	11.02	38.88	81.18	74.43	10.525	64.83
Vitvi02g00046	5.065	2.34062	7.62653e-05	0.000994895	up	0.47	2.7	7.29	7.58	10.28	1.585	8.38333
Vitvi02g00096	0.444	-1.1705	3.94002e-10	2.01113e-08	down	101.5	90.41	50.11	38.75	47.35	95.955	45.4033
Vitvi02g00108	5.58	2.48031	3.68272e-38	4.85222e-35	up	6.04	8.94	46.47	40.15	44.68	7.49	43.7667
Vitvi02g00195	3.13	1.64601	3.35839e-05	0.000495092	up	1.34	1.39	4.23	4.18	5.01	1.365	4.47333
Vitvi02g00211	5.9	2.56083	2.12341e-05	0.000336821	up	0.62	0.35	4.39	2.26	2.33	0.485	2.99333
Vitvi02g00223	2.799	1.48512	2.8123e-09	1.20832e-07	up	14.51	14.93	47.58	45.78	41.16	14.72	44.84
Vitvi02g00226	4.565	2.19049	6.90985e-23	2.34946e-20	up	2.63	3.38	15.63	12.5	14.95	3.005	14.36
Vitvi02g00240	2.372	1.24624	0.00161516	0.0120315	up	1.48	2.92	7.06	4.3	5.03	2.2	5.46333
Vitvi02g00241	2.443	1.2885	8.47562e-05	0.00108749	up	2.79	2.66	8.15	5.18	7.68	2.725	7.00333
Vitvi02g00370	5.477	2.45347	6.38017e-18	1.22273e-15	up	1.28	0.9	6.3	5.89	7.83	1.09	6.67333
Vitvi02g00385	0.413	-1.27698	1.24579e-10	7.00336e-09	down	20.06	17.47	9.45	6.65	9.07	18.765	8.39
Vitvi02g00386	0.247	-2.01864	3.63658e-12	2.77763e-10	down	181.95	145.45	58.12	28.12	43.26	163.7	43.1667
Vitvi02g00388	0.453	-1.14363	0.000387548	0.00381693	down	35.44	23.92	19.07	10.18	13.08	29.68	14.11
Vitvi02g00454	2.084	1.05943	1.18556e-06	2.8145e-05	up	5.19	5.09	13.4	9.49	11.12	5.14	11.3367
Vitvi02g00501	0.305	-1.71421	1.38404e-08	5.18241e-07	down	163.32	121.09	64.9	30.81	42.26	142.205	45.99
Vitvi02g00507	0.419	-1.25344	6.19472e-09	2.47331e-07	down	27.38	25.61	14.07	9.88	11.15	26.495	11.7
Vitvi02g00511	2.896	1.53417	2.88518e-16	4.50536e-14	up	15.1	15.88	54.54	37.67	48.66	15.49	46.9567
Vitvi02g00531	2.094	1.06639	2.44775e-05	0.000380538	up	52.89	66.45	165.76	92.04	139.05	59.67	132.283
Vitvi02g00532	2.096	1.06758	1.63284e-07	4.83453e-06	up	122.5	171.94	394.19	269.47	313.88	147.22	325.847
Vitvi02g00605	0.163	-2.6205	1.19555e-16	2.00028e-14	down	15.51	11.55	3.07	1.58	2.27	13.53	2.30667
Vitvi02g01143	0.487	-1.03809	1.34446e-17	2.5082e-15	down	118.38	100.97	56.87	56.02	54.95	109.675	55.9467
Vitvi02g01251	0.205	-2.28459	4.16008e-09	1.70953e-07	down	19.8	11.08	4.44	2.68	3.02	15.44	3.38
Vitvi02g01277	3.473	1.7962	0.00543755	0.0310311	up	1.89	2.27	8.22	3.98	11.07	2.08	7.75667
Vitvi02g01343	2.136	1.09492	0.000404738	0.00395746	up	2.08	2.11	4.32	3.64	6.1	2.095	4.68667
Vitvi02g01367	0.386	-1.37363	8.04462e-11	4.73711e-09	down	18.6	16.7	8.34	6.33	9.7	17.65	8.12333
Vitvi02g01405	0.31	-1.68871	9.09798e-06	0.000163229	down	14.34	11.37	5.13	4.83	2.88	12.855	4.28
Vitvi02g01406	0.21	-2.25182	4.20242e-31	3.8518e-28	down	1898.12	1368.5	426.83	328.97	339.02	1633.31	364.94
Vitvi02g01408	0.334	-1.58351	5.71548e-10	2.84842e-08	down	828.08	610.59	310.83	175.92	276.77	719.335	254.507
Vitvi02g01438	6.841	2.77428	4.01715e-39	6.04896e-36	up	126.4	93.47	914.51	714.63	880.94	109.935	836.693
Vitvi02g01439	16.493	4.04379	1.72456e-19	3.86759e-17	up	4.73	1.24	41.69	64.87	51.13	2.985	52.5633
Vitvi02g01440	4.045	2.01599	3.77266e-46	9.94142e-43	up	161.85	134.32	666.45	597.46	644.95	148.085	636.287
Vitvi02g01447	12.307	3.62138	0.000237594	0.00254804	up	0.21	0.2	1.43	2.77	3.51	0.205	2.57
Vitvi02g01455	0.237	-2.07766	0.00107951	0.00872927	down	8.1	7.86	2.69	2.25	1.06	7.98	2
Vitvi02g01483	0.461	-1.11786	3.08885e-07	8.45663e-06	down	4.91	5.6	2.63	2.56	2.41	5.255	2.53333
Vitvi02g01488	0.196	-2.34994	9.30814e-05	0.00117079	down	9.14	17.93	0.99	4.5	3.08	13.535	2.85667
Vitvi02g01491	0.173	-2.53453	0.00123491	0.00970298	down	3.32	9.35	0.34	2.15	0.85	6.335	1.11333
Vitvi02g01494	0.47	-1.09069	1.06225e-05	0.000187034	down	7.94	8.14	4.04	3.3	5.28	8.04	4.20667
Vitvi02g01612	0.097	-3.3601	0.00149085	0.0112849	down	0.84	13.01	0.29	0.52	1.32	6.925	0.71
Vitvi02g01663	0.349	-1.51996	1.21243e-24	5.21617e-22	down	47.02	43.42	16.93	16.82	14.61	45.22	16.12
Vitvi02g01732	5.158	2.36673	7.54341e-06	0.000138401	up	0.58	1.58	5.05	5.99	6.53	1.08	5.85667
Vitvi02g01784	0.35	-1.51427	6.36226e-05	0.000855921	down	5.88	6.96	2.9	1.75	2.54	6.42	2.39667
Vitvi02g01788	0.166	-2.58767	0.00121663	0.00959875	down	7.42	9.9	0.71	0.32	3.51	8.66	1.51333
Vitvi02g01823	2.528	1.33824	3.70687e-07	9.90425e-06	up	6.68	5.61	20.59	13.39	15.01	6.145	16.33
Vitvi02g01832	2.365	1.24199	0.00667877	0.036466	up	3.79	3.97	12.78	8.33	8.47	3.88	9.86
Vitvi03g00009	2.385	1.25425	2.11999e-09	9.36929e-08	up	6.72	7.64	20.08	14.02	19.63	7.18	17.91
Vitvi03g00023	2	1.00007	8.18614e-07	2.02075e-05	up	6.1	6.09	15.44	10.86	11.95	6.095	12.75
Vitvi03g00047	0.414	-1.27397	0.00377507	0.0235322	down	4.03	3.9	1.74	2.5	1.74	3.965	1.99333
Vitvi03g00077	2.527	1.3376	1.37203e-06	3.16771e-05	up	3.1	2.2	7.44	6.92	6.7	2.65	7.02
Vitvi03g00083	0.194	-2.36811	0.000214643	0.00235917	down	8.36	3.55	2.06	0.5	1.1	5.955	1.22
Vitvi03g00120	3.057	1.61203	1.63894e-09	7.49467e-08	up	1.92	2.35	7.55	5.34	6.38	2.135	6.42333
Vitvi03g00122	2.692	1.42857	2.10865e-07	6.03154e-06	up	3.61	5.67	15.45	10.54	13.22	4.64	13.07
Vitvi03g00124	2.059	1.04225	2.09937e-07	6.01316e-06	up	62.64	69.46	178.64	115.3	132.54	66.05	142.16
Vitvi03g00149	2.133	1.09261	0.00393213	0.0242804	up	2.61	4.03	5.95	10.3	6.01	3.32	7.42
Vitvi03g00168	2.118	1.08298	6.75977e-08	2.15155e-06	up	3.74	4.8	10.32	8.26	10.01	4.27	9.53
Vitvi03g00175	3.817	1.93231	1.19299e-14	1.41289e-12	up	2.45	3.43	13.19	9.91	11.17	2.94	11.4233
Vitvi03g00217	0.355	-1.49267	0.000406473	0.0039689	down	26.02	13.52	11.29	4.23	6.66	19.77	7.39333
Vitvi03g00227	2.581	1.36809	1.80829e-10	9.87579e-09	up	6.67	8.97	25.79	21.06	17.88	7.82	21.5767
Vitvi03g00267	0.189	-2.40615	4.87725e-06	9.50253e-05	down	10.46	7.25	1.73	1.03	2.62	8.855	1.79333
Vitvi03g00268	0.317	-1.65738	0.00719182	0.0386269	down	1.25	3.78	0.44	1.31	0.73	2.515	0.826667
Vitvi03g00306	0.492	-1.02297	7.14248e-19	1.52092e-16	down	55.54	49.82	26.59	27.3	27.51	52.68	27.1333
Vitvi03g00311	2.661	1.41196	0.000160817	0.00186377	up	1.54	1.76	4.9	3.6	5.39	1.65	4.63
Vitvi03g00315	2.075	1.05341	6.16055e-07	1.56282e-05	up	26.61	29.76	78.17	56.38	49.38	28.185	61.31
Vitvi03g00407	5.547	2.47168	4.48424e-08	1.49576e-06	up	0.84	1.01	7.12	3.18	5.59	0.925	5.29667
Vitvi03g00447	3.237	1.69444	2.76981e-13	2.66622e-11	up	1.87	2.13	4.89	5.74	8.32	2	6.31667
Vitvi03g00489	3.91	1.967	6.94548e-07	1.74229e-05	up	2.78	1.34	9.14	7.88	8.54	2.06	8.52
Vitvi03g00508	0.41	-1.28592	0.00972248	0.0486608	down	78.93	56.99	24.47	19.3	43.93	67.96	29.2333
Vitvi03g00516	2.381	1.25137	1.41972e-05	0.000238859	up	2.81	4.84	10.52	7.49	10.51	3.825	9.50667
Vitvi03g00549	0.491	-1.02743	4.63712e-06	9.07661e-05	down	30.68	30.74	18.06	13.93	16.15	30.71	16.0467
Vitvi03g00566	0.447	-1.16178	5.65904e-08	1.84102e-06	down	18.71	18.13	7.3	10.36	7.86	18.42	8.50667
Vitvi03g00673	2.264	1.17878	2.1606e-11	1.42336e-09	up	12.11	16.4	36.53	32.01	32.91	14.255	33.8167
Vitvi03g00712	0.247	-2.01564	3.95944e-24	1.60517e-21	down	62.17	71.01	17.64	14.76	20.03	66.59	17.4767
Vitvi03g00726	5.327	2.41331	3.74779e-26	1.97518e-23	up	0.99	1.04	5.88	5.33	5.75	1.015	5.65333
Vitvi03g00752	0.332	-1.59046	3.13801e-08	1.09162e-06	down	2090.39	2071.28	729.85	1050.99	466.16	2080.84	749
Vitvi03g00757	0.461	-1.11828	1.52541e-05	0.000254206	down	62.75	55.07	24.83	38.65	22.45	58.91	28.6433
Vitvi03g00779	6.728	2.75016	2.38102e-12	1.90853e-10	up	0.45	0.97	5.25	4.7	5.11	0.71	5.02
Vitvi03g00781	6.153	2.62129	1.93028e-16	3.13018e-14	up	0.62	1.25	6.52	5.23	6.3	0.935	6.01667
Vitvi03g01198	0.342	-1.54885	0.00588707	0.0330891	down	7.48	5.33	2.81	2.45	1.87	6.405	2.37667
Vitvi03g01202	0.274	-1.86896	4.50603e-05	0.000638384	down	18.09	26.59	9.75	7.12	4.52	22.34	7.13
Vitvi03g01213	2.061	1.0431	0.00158277	0.0118488	up	2.82	1.8	4.98	6.15	3.84	2.31	4.99
Vitvi03g01294	6.457	2.69075	1.10321e-10	6.26865e-09	up	1.24	2.41	15.36	10.22	11.85	1.825	12.4767
Vitvi03g01337	2.278	1.18755	0.0045349	0.0270925	up	3.79	4.01	11.28	6.24	11.53	3.9	9.68333
Vitvi03g01371	0.322	-1.63439	3.93519e-12	2.9734e-10	down	4040	3276.41	1655.92	957.75	1337.79	3658.2	1317.15
Vitvi03g01389	2.411	1.26988	3.0096e-13	2.87083e-11	up	17.4	20.08	43.14	44.38	54.61	18.74	47.3767
Vitvi03g01390	2.804	1.48769	1.55014e-10	8.53225e-09	up	5.85	4.31	13.79	16.56	14.51	5.08	14.9533
Vitvi03g01391	3.29	1.71792	5.96769e-15	7.44407e-13	up	4.13	4.81	19.43	15.36	16.88	4.47	17.2233
Vitvi03g01395	2.209	1.14348	0.00347282	0.0220513	up	4.74	5.34	15.45	8.12	11.92	5.04	11.83
Vitvi03g01472	0.414	-1.27125	0.000594591	0.00540051	down	13.39	19.34	7.25	5.59	8.86	16.365	7.23333
Vitvi03g01479	0.147	-2.76606	1.27088e-06	2.97352e-05	down	57.76	36.73	9.89	2.13	10.65	47.245	7.55667
Vitvi03g01520	0.452	-1.14431	1.24764e-13	1.26449e-11	down	627.12	612.04	282.7	311.43	329.45	619.58	307.86
Vitvi03g01527	0.461	-1.11758	0.000515088	0.0048196	down	30.9	31.39	17.98	11.15	17.38	31.145	15.5033
Vitvi03g01540	2.122	1.08568	0.00125634	0.00983836	up	2.53	3.92	5.79	7.39	8.34	3.225	7.17333
Vitvi03g01562	2.043	1.03042	1.65491e-05	0.000272131	up	4.99	5.22	10.03	10.72	12.19	5.105	10.98
Vitvi03g01612	0.454	-1.13863	0.000587599	0.00535546	down	15.73	13.96	6.89	5.99	8.75	14.845	7.21
Vitvi03g01630	2.355	1.23546	0.00171194	0.0126143	up	0.94	0.71	1.44	2.4	2.32	0.825	2.05333
Vitvi03g01759	2.371	1.24577	0.000693366	0.00610052	up	8.12	6.78	21.09	12.06	23.25	7.45	18.8
Vitvi03g01760	4.446	2.1524	4.00727e-09	1.65967e-07	up	3.01	2.58	14.71	11.24	13.76	2.795	13.2367
Vitvi03g01763	5.638	2.4953	1.30986e-05	0.000223308	up	0.63	1.86	7.82	5.6	8.85	1.245	7.42333
Vitvi03g01801	2.759	1.46389	0.00373232	0.0233405	up	3.09	1.16	7.41	6.25	4.98	2.125	6.21333
Vitvi03g01833	0.487	-1.03917	0.000519317	0.00484842	down	4.89	7.86	3.24	2.57	3.72	6.375	3.17667
Vitvi03g01897	2.737	1.45266	6.83036e-08	2.16854e-06	up	5.11	5.9	17.32	12.36	17.93	5.505	15.87
Vitvi04g00041	3.343	1.74126	3.7468e-12	2.84845e-10	up	8.65	12.31	42.61	29.66	38.57	10.48	36.9467
Vitvi04g00089	5.596	2.48436	1.92856e-23	7.13263e-21	up	1.63	1.85	11.46	9.24	9.94	1.74	10.2133
Vitvi04g00092	2.875	1.5235	3.63571e-11	2.29474e-09	up	15.13	22.67	58.11	46.09	63.93	18.9	56.0433
Vitvi04g00135	4.105	2.03749	2.46616e-06	5.28346e-05	up	6.32	6.11	18.38	18.45	43.5	6.215	26.7767
Vitvi04g00236	4.126	2.04461	5.13456e-16	7.69721e-14	up	4.56	5.77	25.56	17.43	19.77	5.165	20.92
Vitvi04g00242	3.745	1.90503	2.90158e-29	2.10925e-26	up	8.09	7.81	32.94	31.02	30.08	7.95	31.3467
Vitvi04g00345	0.199	-2.331	1.82136e-14	2.09814e-12	down	24	20.69	5.72	4.45	4.25	22.345	4.80667
Vitvi04g00365	3.7	1.88738	1.39164e-28	9.16785e-26	up	2.12	2.56	9.74	8.78	8.72	2.34	9.08
Vitvi04g00369	2.669	1.41624	6.19681e-08	1.98835e-06	up	5.07	4.2	14.54	9.74	14.67	4.635	12.9833
Vitvi04g00391	2.387	1.25531	5.31877e-07	1.3724e-05	up	2.07	2.42	6.13	5.65	5.07	2.245	5.61667
Vitvi04g00433	0.5	-1.00028	0.000277776	0.00290611	down	49.42	40.08	32.58	18.42	19.69	44.75	23.5633
Vitvi04g00506	0.314	-1.67217	5.96302e-09	2.39441e-07	down	37.73	81.6	18.53	20.2	19.32	59.665	19.35
Vitvi04g00512	0.445	-1.16787	4.86076e-12	3.60809e-10	down	112.33	97.29	57.72	43.58	45.53	104.81	48.9433
Vitvi04g00533	2.86	1.51618	6.17218e-08	1.9865e-06	up	10.76	11.23	46.21	25.23	27.66	10.995	33.0333
Vitvi04g00602	7.044	2.81636	1.41707e-59	1.49366e-55	up	16	16.82	140.79	111.15	115.47	16.41	122.47
Vitvi04g00632	2.595	1.37599	0.00386303	0.0239167	up	1.62	2.7	3.04	9.68	4.79	2.16	5.83667
Vitvi04g00761	4.5	2.16981	8.19118e-29	5.57027e-26	up	3.06	3.62	17.21	13.72	16.23	3.34	15.72
Vitvi04g01007	2.353	1.23437	4.19924e-12	3.15033e-10	up	32.03	36.45	81.99	72.44	99.17	34.24	84.5333
Vitvi04g01244	0.382	-1.38769	2.73232e-08	9.66119e-07	down	126.28	108.38	61.41	34.96	48.06	117.33	48.1433
Vitvi04g01275	2.353	1.23463	2.23725e-09	9.82574e-08	up	5.31	5.35	12.83	10.95	15.59	5.33	13.1233
Vitvi04g01299	2.206	1.14155	7.53086e-05	0.000984852	up	2.83	2.34	6.84	5.62	5.5	2.585	5.98667
Vitvi04g01368	0.186	-2.42401	0.00304078	0.0199154	down	3482.68	3741.65	559.72	288.7	1318.41	3612.16	722.277
Vitvi04g01407	2.362	1.23978	2.02578e-05	0.000322305	up	4.01	3.33	11.34	6.96	9	3.67	9.1
Vitvi04g01453	3.714	1.893	3.90592e-23	1.37235e-20	up	7.25	9.72	36.46	30.66	32.56	8.485	33.2267
Vitvi04g01508	0.357	-1.48521	4.48398e-20	1.07417e-17	down	38.34	32.09	13.26	14.3	12.53	35.215	13.3633
Vitvi04g01566	0.454	-1.14051	1.9561e-05	0.000314303	down	24.52	32.4	12.92	15.19	13.21	28.46	13.7733
Vitvi04g01576	0.364	-1.45616	1.60608e-17	2.91877e-15	down	47.35	42.48	16.78	14.65	19.94	44.915	17.1233
Vitvi04g01596	0.237	-2.07448	0.000751075	0.00650243	down	36.21	25.47	10.03	3.71	10.34	30.84	8.02667
Vitvi04g01603	2.408	1.26764	0.000200035	0.00222295	up	5.97	5.26	16.14	13.52	13.8	5.615	14.4867
Vitvi04g01666	2.477	1.30888	1.79499e-09	8.08552e-08	up	7.48	8.39	21.04	22.16	19.05	7.935	20.75
Vitvi04g01792	4.229	2.08028	1.6085e-15	2.20187e-13	up	21.57	23.61	99.68	79.62	128.4	22.59	102.567
Vitvi04g01795	2.937	1.55424	0.000307156	0.00314906	up	2.47	2.24	6.94	5.37	9.24	2.355	7.18333
Vitvi04g01797	3.464	1.79245	0.000532435	0.00494896	up	1.53	2.09	7.27	5.4	7.51	1.81	6.72667
Vitvi04g01799	3.374	1.75448	6.10218e-05	0.000828867	up	3.32	3.83	11.7	11.42	18.18	3.575	13.7667
Vitvi04g01800	5.09	2.34753	1.28008e-12	1.07941e-10	up	6.62	3.66	27.75	23.83	33.24	5.14	28.2733
Vitvi04g01801	7.754	2.95485	2.66468e-09	1.15585e-07	up	0.59	0.65	6.58	9.53	11.35	0.62	9.15333
Vitvi04g01855	2.551	1.35127	4.02924e-25	1.84653e-22	up	6.26	6.78	17.22	17.01	18.09	6.52	17.44
Vitvi04g01894	2.279	1.18867	0.00994206	0.0493731	up	2.9	2.14	8.16	3.68	6.38	2.52	6.07333
Vitvi04g01907	0.193	-2.37089	0.000341753	0.00344219	down	15.05	9.55	4.23	0.55	2.8	12.3	2.52667
Vitvi04g01916	2.249	1.16942	0.00170237	0.0125745	up	1.31	2.2	4.08	3.66	5.48	1.755	4.40667
Vitvi04g02017	0.444	-1.1704	2.67346e-05	0.000409885	down	50.03	33.95	21.36	19.04	20.02	41.99	20.14
Vitvi04g02024	2.125	1.08766	9.88281e-05	0.00123278	up	2.96	4.51	7.63	9.12	8.24	3.735	8.33
Vitvi04g02063	2.141	1.09844	4.28134e-16	6.49316e-14	up	131.02	125.12	323.99	262.32	284.86	128.07	290.39
Vitvi04g02163	4.934	2.30275	3.06741e-16	4.75471e-14	up	3.73	2.63	19.31	14.44	13.7	3.18	15.8167
Vitvi04g02172	0.104	-3.26179	3.62633e-12	2.77763e-10	down	13.88	11.84	1.33	1.81	1.12	12.86	1.42
Vitvi04g02188	2.483	1.31191	9.73202e-05	0.00121685	up	9.11	11.94	37.68	27.25	18.49	10.525	27.8067
Vitvi04g02223	3.987	1.99525	1.93967e-10	1.05659e-08	up	18.47	21.01	96.36	60.63	101.79	19.74	86.26
Vitvi04g02296	4.083	2.02953	1.7412e-11	1.15067e-09	up	1.87	2.24	10.52	8.74	7.62	2.055	8.96
Vitvi04g02297	3.377	1.75575	1.65031e-07	4.87257e-06	up	1.15	2.05	6.4	5.75	4.92	1.6	5.69
Vitvi04g02306	2.039	1.02766	0.000331738	0.0033528	up	19.09	26.08	69.51	56.61	33.2	22.585	53.1067
Vitvi04g02318	2.984	1.57747	1.5227e-05	0.000253956	up	1.79	2.08	6.77	5.36	6.16	1.935	6.09667
Vitvi05g00046	2.027	1.01933	0.00335902	0.0214624	up	10.73	10.75	25.98	16.74	27.64	10.74	23.4533
Vitvi05g00064	0.222	-2.17436	1.05643e-07	3.22764e-06	down	12.11	7.11	3.74	1.79	1.75	9.61	2.42667
Vitvi05g00083	3.299	1.72188	3.93737e-13	3.64052e-11	up	1.51	2.3	6.95	6.02	6.37	1.905	6.44667
Vitvi05g00107	0.329	-1.60596	2.05142e-24	8.64922e-22	down	1223.01	1015.26	431.83	339.32	391.63	1119.13	387.593
Vitvi05g00108	0.428	-1.22515	0.00240114	0.0164988	down	21.94	20.52	9.59	5.01	14.17	21.23	9.59
Vitvi05g00114	2.084	1.05908	2.3477e-08	8.43563e-07	up	4.73	4.3	10.66	9.35	9.51	4.515	9.84
Vitvi05g00135	2.79	1.48006	4.02183e-09	1.66243e-07	up	3.72	5.19	13.75	13.12	14.08	4.455	13.65
Vitvi05g00235	0.423	-1.24002	1.65427e-05	0.000272131	down	13.74	13.98	5.36	5.68	7.53	13.86	6.19
Vitvi05g00236	4.141	2.04996	9.28959e-05	0.00116984	up	1.42	2.2	12.67	4.91	6.17	1.81	7.91667
Vitvi05g00237	2.352	1.23372	1.66713e-07	4.90491e-06	up	2.06	2.23	4.84	4.5	6.65	2.145	5.33
Vitvi05g00266	2.075	1.0532	0.00872407	0.0447148	up	2.12	2.19	4.23	3.04	6.83	2.155	4.7
Vitvi05g00292	3.142	1.65172	9.15282e-09	3.50183e-07	up	4.55	5.25	19.71	12.51	16.44	4.9	16.22
Vitvi05g00312	2.07	1.04939	8.65774e-08	2.69991e-06	up	11.41	13.79	30.29	27.27	24.92	12.6	27.4933
Vitvi05g00444	2.513	1.32951	1.66824e-07	4.90491e-06	up	2.43	2.38	6.46	5.25	7.28	2.405	6.33
Vitvi05g00457	0.401	-1.31958	6.08157e-12	4.40569e-10	down	60.8	47.51	25.26	21.24	22.28	54.155	22.9267
Vitvi05g00462	0.479	-1.06128	7.49701e-13	6.61274e-11	down	182.11	183.88	91.63	96.58	117.43	182.995	101.88
Vitvi05g00519	4.036	2.01279	2.89066e-06	6.07557e-05	up	1.02	1.82	7.34	5.02	5.77	1.42	6.04333
Vitvi05g00541	2.006	1.0042	2.8553e-16	4.49198e-14	up	21.49	23.77	49.31	44.13	49.4	22.63	47.6133
Vitvi05g00548	0.215	-2.21976	8.62607e-09	3.31836e-07	down	17.5	16.71	5.96	1.99	3.69	17.105	3.88
Vitvi05g00557	3.474	1.79646	3.77373e-16	5.80686e-14	up	6.29	8	28.13	23.43	27.01	7.145	26.19
Vitvi05g00640	0.198	-2.33784	0.00304169	0.0199154	down	1.29	5.3	0.41	0.5	1.15	3.295	0.686667
Vitvi05g00670	0.279	-1.84162	0.000589516	0.00536365	down	396.42	650.38	143.24	96.92	233.55	523.4	157.903
Vitvi05g00675	0.379	-1.39861	1.13894e-07	3.45467e-06	down	31.42	23.44	12.52	7.97	12.92	27.43	11.1367
Vitvi05g00681	0.35	-1.51652	5.76978e-10	2.8687e-08	down	20.73	17.19	8.16	5.03	7.63	18.96	6.94
Vitvi05g00726	0.424	-1.23704	0.000348276	0.00349327	down	12.52	16.15	5.15	5.98	8.21	14.335	6.44667
Vitvi05g00737	0.493	-1.0214	1.78152e-16	2.93408e-14	down	128.34	118.19	63.28	58.26	68.54	123.265	63.36
Vitvi05g00780	2.558	1.35478	2.23539e-14	2.5611e-12	up	2.94	3.5	8.79	8.11	8.94	3.22	8.61333
Vitvi05g00783	2.628	1.39379	4.33525e-13	3.95634e-11	up	2.52	2.54	6.39	6.91	7.57	2.53	6.95667
Vitvi05g00815	3.246	1.69877	3.2298e-08	1.11802e-06	up	1.29	2.12	6.17	5.38	5.85	1.705	5.8
Vitvi05g00924	2.086	1.06103	6.71639e-06	0.000124637	up	28.9	36.61	55.63	93.54	65.33	32.755	71.5
Vitvi05g00963	2.072	1.05072	7.58241e-05	0.000990979	up	29.6	41.1	89.28	51.62	88.95	35.35	76.6167
Vitvi05g01104	2.438	1.28582	9.90459e-13	8.52239e-11	up	2.78	2.68	6.49	6.56	7.86	2.73	6.97
Vitvi05g01259	2.299	1.20075	0.00984568	0.0490654	up	4.14	3.92	10.69	11.17	8.87	4.03	10.2433
Vitvi05g01266	2.055	1.03928	3.1612e-06	6.53988e-05	up	28.36	31.65	64.78	51.73	79.15	30.005	65.22
Vitvi05g01370	3.254	1.70219	0.000962458	0.00796607	up	2.68	3.83	14.08	5.45	13.86	3.255	11.13
Vitvi05g01500	2.042	1.02996	3.01266e-08	1.05323e-06	up	16.75	14.99	34.32	29.7	38.26	15.87	34.0933
Vitvi05g01575	0.468	-1.09593	0.000936273	0.00781068	down	8.32	11.56	4.43	4.68	5.69	9.94	4.93333
Vitvi05g01583	0.341	-1.5537	0.00895697	0.0456621	down	1302.78	923.12	373.56	209.99	615.6	1112.95	399.717
Vitvi05g01620	2.119	1.08312	0.000390336	0.00383085	up	3.5	3.65	7.45	6.27	10.07	3.575	7.93
Vitvi05g01685	602.628	9.23512	2.99597e-06	6.26121e-05	up	0	0	8.37	1.03	6.63	0	5.34333
Vitvi05g01752	8.22	3.03922	1.27326e-54	5.3683e-51	up	20.92	22.47	209.89	162.48	203.66	21.695	192.01
Vitvi05g01767	2.613	1.38568	1.99823e-08	7.27543e-07	up	18.58	23.82	74.79	55.56	46.48	21.2	58.9433
Vitvi05g01833	0.303	-1.72231	3.87951e-06	7.7447e-05	down	4.65	4.97	1.39	2	1.19	4.81	1.52667
Vitvi05g01931	0.3	-1.73769	0.00931322	0.0470482	down	243.96	121.71	93.21	29.24	54.96	182.835	59.1367
Vitvi05g01937	0.333	-1.5871	3.0437e-08	1.06232e-06	down	68.72	90.14	30.07	20.16	35.27	79.43	28.5
Vitvi05g01941	0.355	-1.49331	2.07959e-05	0.000330367	down	18.73	25.91	6.35	7.28	11.64	22.32	8.42333
Vitvi05g01942	0.312	-1.68221	2.25548e-10	1.21606e-08	down	51.95	81.36	20.68	20.08	25.53	66.655	22.0967
Vitvi05g01949	0.393	-1.34657	0.00954659	0.0480085	down	9.65	10.4	6.61	2.09	4	10.025	4.23333
Vitvi05g02124	3.063	1.61514	3.90351e-05	0.00056363	up	6.14	7.91	33.07	22.63	14.18	7.025	23.2933
Vitvi05g02175	0.361	-1.46853	0.00866986	0.0445344	down	47.12	39.71	28.37	15.7	14.8	43.415	19.6233
Vitvi05g02185	2.297	1.19973	0.00215929	0.0151784	up	17.33	20.41	30.11	73.59	33.8	18.87	45.8333
Vitvi05g02186	2.095	1.0668	0.00912222	0.0462366	up	8.23	11.01	13.73	34.68	15.1	9.62	21.17
Vitvi05g02187	2.316	1.21191	0.00204597	0.0145664	up	12.09	18.15	25.95	57.75	27.01	15.12	36.9033
Vitvi05g02249	0.27	-1.89161	0.00161363	0.0120286	down	241.9	174.11	56.5	29.66	91.05	208.005	59.07
Vitvi05g02250	6.173	2.62605	0.00147827	0.0112058	up	3.66	2.49	10.59	38.7	22.4	3.075	23.8967
Vitvi05g02251	0.268	-1.90181	0.00163582	0.012151	down	28.97	76.69	9.78	14.47	20.02	52.83	14.7567
Vitvi06g00033	0.488	-1.03519	5.5894e-11	3.41536e-09	down	33.21	31.21	19.2	15.76	18.03	32.21	17.6633
Vitvi06g00088	2.568	1.36054	0.00926969	0.0468732	up	2.08	1.53	5.01	4.1	5.74	1.805	4.95
Vitvi06g00102	3.29	1.71806	2.59798e-12	2.06672e-10	up	1.7	1.96	7.37	5.04	6.46	1.83	6.29
Vitvi06g00175	3.412	1.77075	6.14543e-12	4.43671e-10	up	9.16	7.65	33.06	26.82	31.87	8.405	30.5833
Vitvi06g00178	3.302	1.72313	5.2947e-18	1.04315e-15	up	31.24	39.9	143.58	103.09	128.23	35.57	124.967
Vitvi06g00180	3.516	1.81404	1.62848e-20	4.18659e-18	up	3.92	3.44	14.17	12.99	13.51	3.68	13.5567
Vitvi06g00266	2.462	1.2999	1.02175e-05	0.000180549	up	4.11	2.1	7.28	8.1	8.59	3.105	7.99
Vitvi06g00271	2.568	1.36061	0.000241526	0.00258349	up	1.45	3.1	4.55	7.78	5.52	2.275	5.95
Vitvi06g00303	0.48	-1.05868	0.000864034	0.00730048	down	44.7	27.89	23.56	19.28	12.44	36.295	18.4267
Vitvi06g00317	0.402	-1.31642	1.95371e-15	2.64014e-13	down	24.87	24.17	10.53	10.51	10.01	24.52	10.35
Vitvi06g00412	4.765	2.25258	4.04625e-24	1.60942e-21	up	9.93	9.39	52.65	38.06	54.79	9.66	48.5
Vitvi06g00414	0.374	-1.41719	1.80263e-10	9.87043e-09	down	16.12	14.01	6.47	5.39	7.29	15.065	6.38333
Vitvi06g00423	2.317	1.21229	1.09336e-14	1.30221e-12	up	100.57	112.94	304.22	227.06	255.98	106.755	262.42
Vitvi06g00433	2.857	1.51465	1.95289e-13	1.92378e-11	up	87.89	103.51	378.36	251.45	294.65	95.7	308.153
Vitvi06g00443	2.628	1.3942	3.91101e-25	1.83218e-22	up	52.17	55.58	130.75	154.62	159.36	53.875	148.243
Vitvi06g00481	2.05	1.03586	3.00375e-06	6.2695e-05	up	81.41	71.03	199.98	121.14	172.71	76.22	164.61
Vitvi06g00513	0.485	-1.04535	1.12247e-09	5.24676e-08	down	170.54	129.23	84.35	69.33	74.31	149.885	75.9967
Vitvi06g00544	0.463	-1.1114	0.000135116	0.00161108	down	5.73	4.69	3.74	2.61	2.7	5.21	3.01667
Vitvi06g00569	4.923	2.29955	5.99967e-49	1.80684e-45	up	21.34	23.92	133.73	103.45	113.71	22.63	116.963
Vitvi06g00591	3.36	1.74863	1.03502e-07	3.17139e-06	up	1.3	1.23	5.26	4.18	3.92	1.265	4.45333
Vitvi06g00605	2.648	1.40481	7.43525e-12	5.24222e-10	up	17.54	25.43	69.89	56.78	51.98	21.485	59.55
Vitvi06g00645	253.137	7.98377	2.31641e-07	6.53713e-06	up	0	0	2.86	1.46	1.62	0	1.98
Vitvi06g00656	0.331	-1.59447	1.20606e-16	2.00196e-14	down	21.93	23.04	7.35	8.01	7.02	22.485	7.46
Vitvi06g00666	0.467	-1.09892	8.53132e-08	2.66443e-06	down	2574.73	2143.76	1371.8	881.12	1214.45	2359.24	1155.79
Vitvi06g00728	10.968	3.45528	3.85011e-17	6.82052e-15	up	0.29	0.6	4.89	4.37	6.15	0.445	5.13667
Vitvi06g00761	2.872	1.5219	1.89683e-09	8.49232e-08	up	5.07	5.22	18.48	11.69	16.33	5.145	15.5
Vitvi06g00784	0.498	-1.00694	1.35902e-06	3.14138e-05	down	55.3	47.15	23.91	22.8	33.67	51.225	26.7933
Vitvi06g00790	5.738	2.5205	1.20266e-12	1.02645e-10	up	2.46	2.88	20.02	16.21	12.41	2.67	16.2133
Vitvi06g00799	0.358	-1.48171	1.60061e-05	0.000265062	down	224.53	187.3	118.49	44.85	73.64	205.915	78.9933
Vitvi06g00903	4.441	2.15082	1.20895e-21	3.69361e-19	up	3.78	4.91	24.22	17.24	19.14	4.345	20.2
Vitvi06g00920	0.481	-1.0557	4.90357e-21	1.36016e-18	down	149.07	135.09	68.62	69.09	76.11	142.08	71.2733
Vitvi06g00964	2.931	1.55153	1.91763e-20	4.87056e-18	up	2.13	2.16	6.53	6.15	7.03	2.145	6.57
Vitvi06g01156	0.161	-2.63753	2.68852e-05	0.000411186	down	5.31	5.83	0.6	0.3	1.87	5.57	0.923333
Vitvi06g01166	2.053	1.03778	0.000217802	0.00238395	up	15.3	11.33	35.18	20.8	30.41	13.315	28.7967
Vitvi06g01183	3.735	1.90119	8.84279e-06	0.000159329	up	1	1.89	7.19	3.8	6.22	1.445	5.73667
Vitvi06g01240	0.228	-2.12999	4.46234e-05	0.000633473	down	10.88	7	2	2.84	1.72	8.94	2.18667
Vitvi06g01261	0.406	-1.30028	2.49546e-17	4.4582e-15	down	102.03	84.4	42.16	36.27	40.74	93.215	39.7233
Vitvi06g01275	4.115	2.04106	1.6676e-21	4.8157e-19	up	7.32	8.79	40.39	33.15	31.39	8.055	34.9767
Vitvi06g01280	4.065	2.02334	6.62301e-26	3.24697e-23	up	44.48	30.52	150.05	175.2	157.93	37.5	161.06
Vitvi06g01340	2.02	1.01465	1.21382e-06	2.86546e-05	up	10.11	11.91	27.59	22.97	19.46	11.01	23.34
Vitvi06g01346	2.851	1.51145	4.98739e-18	9.91878e-16	up	79.95	85.13	299.29	208.96	238.71	82.54	248.987
Vitvi06g01387	4.401	2.13776	1.41277e-23	5.31833e-21	up	4.38	5.32	24.86	22.79	19.6	4.85	22.4167
Vitvi06g01456	5.548	2.47203	1.09107e-39	1.91538e-36	up	7.5	10.08	58.26	48.29	46.75	8.79	51.1
Vitvi06g01531	2.356	1.23638	1.24078e-10	6.99382e-09	up	67.81	51.7	171.14	133.65	144.82	59.755	149.87
Vitvi06g01607	3.161	1.66042	5.56105e-07	1.42445e-05	up	18.19	24.7	88.88	47.61	78.9	21.445	71.7967
Vitvi06g01648	0.261	-1.94051	2.01398e-07	5.81597e-06	down	13.87	10.35	3.85	2.29	3.9	12.11	3.34667
Vitvi06g01669	2.215	1.1474	0.000649874	0.00576842	up	17.78	28.96	44.98	81.37	40.15	23.37	55.5
Vitvi06g01723	0.372	-1.42728	3.57898e-22	1.1261e-19	down	268.14	246.94	114.64	90.2	96.81	257.54	100.55
Vitvi06g01888	2.696	1.43101	0.00106493	0.00864115	up	1.53	1.29	5.78	2.62	3.48	1.41	3.96
Vitvi06g01896	3.278	1.7129	2.38327e-06	5.11105e-05	up	2.11	3.11	12.13	8.51	6.83	2.61	9.15667
Vitvi07g00040	2.656	1.40933	4.78922e-06	9.33964e-05	up	2.52	3.33	10.07	5.82	8.52	2.925	8.13667
Vitvi07g00091	0.326	-1.61724	2.81107e-12	2.2112e-10	down	57.81	54.57	24.91	14.24	18.45	56.19	19.2
Vitvi07g00135	0.405	-1.30275	2.00206e-28	1.27895e-25	down	38.47	37.93	15.84	16.17	17.22	38.2	16.41
Vitvi07g00177	4.273	2.09519	6.68923e-14	7.03351e-12	up	2.23	3.04	13.84	11.25	10.35	2.635	11.8133
Vitvi07g00213	2.124	1.08666	1.03684e-09	4.88984e-08	up	8.66	10.11	20.55	20.53	21.78	9.385	20.9533
Vitvi07g00214	0.448	-1.15922	4.75743e-22	1.47487e-19	down	86.77	79.39	37.25	38.68	40.3	83.08	38.7433
Vitvi07g00219	2.975	1.57271	1.17383e-18	2.40247e-16	up	42.71	53.5	176.86	133.49	147.16	48.105	152.503
Vitvi07g00231	4.719	2.23846	1.13656e-23	4.35631e-21	up	2.09	3	11.99	12.83	12.97	2.545	12.5967
Vitvi07g00243	3.928	1.97397	3.67462e-10	1.88601e-08	up	2.33	2.33	11.03	7.51	10.3	2.33	9.61333
Vitvi07g00251	2.115	1.08063	2.90587e-11	1.86764e-09	up	59.4	71.89	155.7	124.43	157.62	65.645	145.917
Vitvi07g00286	2.045	1.03227	1.31562e-06	3.05446e-05	up	63.26	75.23	123.1	198.09	146.92	69.245	156.037
Vitvi07g00295	2.797	1.4837	0.000653851	0.0057964	up	7.58	3.52	21.46	13.56	15.07	5.55	16.6967
Vitvi07g00301	0.284	-1.81523	6.53486e-09	2.59438e-07	down	35.65	20.18	9.63	6.77	8.77	27.915	8.39
Vitvi07g00317	0.458	-1.12566	7.09331e-05	0.000933421	down	34.72	27.11	18.07	16.58	10.28	30.915	14.9767
Vitvi07g00350	0.148	-2.75973	4.56968e-26	2.29365e-23	down	12.35	18.42	2.32	2.51	2.3	15.385	2.37667
Vitvi07g00352	5.713	2.51416	1.03837e-19	2.37933e-17	up	5.65	7.19	52.93	29.96	32.39	6.42	38.4267
Vitvi07g00361	0.306	-1.70969	0.000996708	0.00819166	down	192.44	174.78	87.49	30.16	59.77	183.61	59.14
Vitvi07g00363	0.46	-1.1195	0.00199041	0.0142526	down	5.33	5.12	2.1	3.66	1.84	5.225	2.53333
Vitvi07g00368	2.133	1.09308	3.27607e-08	1.13218e-06	up	8.96	10.47	19.75	18.94	27.31	9.715	22
Vitvi07g00376	3.946	1.98038	4.12331e-42	8.69234e-39	up	5.03	5.42	21.1	19.1	21.2	5.225	20.4667
Vitvi07g00381	2.343	1.22854	1.1849e-06	2.8145e-05	up	2.89	3.45	6.68	7.88	8.85	3.17	7.80333
Vitvi07g00431	0.442	-1.17853	0.0010361	0.00844953	down	5.49	4.96	3.58	1.53	2.13	5.225	2.41333
Vitvi07g00455	0.181	-2.46832	7.41872e-05	0.000971995	down	103.17	76.25	28.57	8.29	17.54	89.71	18.1333
Vitvi07g00524	3.667	1.87461	8.24147e-08	2.57772e-06	up	1.08	1.2	5.09	3.39	4.26	1.14	4.24667
Vitvi07g00576	2.625	1.39252	3.97598e-06	7.9148e-05	up	9.13	12	36.33	18.16	32.92	10.565	29.1367
Vitvi07g00659	3.388	1.76038	4.57961e-14	4.95091e-12	up	2.79	4.16	12.98	12.67	11.45	3.475	12.3667
Vitvi07g00696	2.021	1.01523	0.000347835	0.00349177	up	2	2.45	5.01	4.08	5.06	2.225	4.71667
Vitvi07g00772	2.239	1.16315	1.83268e-06	4.07538e-05	up	174.32	218.62	430.89	359.33	620.41	196.47	470.21
Vitvi07g00787	0.471	-1.08587	0.000177251	0.00201436	down	49.3	32.93	26.13	14	20.9	41.115	20.3433
Vitvi07g00924	2.855	1.51362	9.22602e-13	7.97106e-11	up	3.62	4.13	14.09	10.23	11.34	3.875	11.8867
Vitvi07g01078	2.616	1.38729	1.47088e-07	4.39826e-06	up	3.59	4.22	12.6	8.5	11.05	3.905	10.7167
Vitvi07g01108	0.229	-2.12965	1.28342e-06	2.99954e-05	down	5.95	12.09	2.59	1.66	2.24	9.02	2.16333
Vitvi07g01296	2.416	1.27243	1.50839e-05	0.000251769	up	2.65	2.48	7.47	6.38	5.64	2.565	6.49667
Vitvi07g01297	2.252	1.17142	5.00664e-07	1.29344e-05	up	16.13	25.52	57.96	48	41.51	20.825	49.1567
Vitvi07g01298	3.693	1.88489	2.60852e-15	3.41554e-13	up	8.9	11.58	45.91	35.32	39.34	10.24	40.19
Vitvi07g01308	2.342	1.22801	3.15836e-08	1.09689e-06	up	9.42	11.44	31.85	21.77	23.19	10.43	25.6033
Vitvi07g01402	2.3	1.20174	2.3489e-08	8.43563e-07	up	2.44	4.25	6.04	5.07	5.85	3.345	5.65333
Vitvi07g01407	0.205	-2.28873	7.44982e-07	1.85651e-05	down	8.53	7.04	2.56	0.77	1.68	7.785	1.67
Vitvi07g01518	2.03	1.02144	0.00542825	0.0309865	up	4.01	8.36	14.42	12.08	13.45	6.185	13.3167
Vitvi07g01520	0.332	-1.58872	0.000218104	0.00238601	down	3.67	2.94	0.85	0.9	1.33	3.305	1.02667
Vitvi07g01600	2.544	1.34723	3.18903e-10	1.65995e-08	up	6.35	7.84	19.04	16.06	20.99	7.095	18.6967
Vitvi07g01630	0.303	-1.72053	0.00323027	0.0208248	down	28.19	32.05	8.16	4.49	17.47	30.12	10.04
Vitvi07g01638	8.393	3.06913	4.71841e-05	0.000665344	up	0.52	0.68	4.44	5.99	5.69	0.6	5.37333
Vitvi07g01658	0.41	-1.28782	0.00133752	0.0103283	down	35.26	20.39	16.39	6.21	13.48	27.825	12.0267
Vitvi07g01679	2.753	1.46107	2.99709e-12	2.34006e-10	up	6.48	7.69	22.81	19.72	19.62	7.085	20.7167
Vitvi07g01686	2.053	1.03751	0.000950821	0.00790446	up	1.72	2.18	5.06	3.14	4.78	1.95	4.32667
Vitvi07g01731	2.021	1.01498	1.79916e-09	8.08701e-08	up	4.42	4.62	9.73	8.29	10.62	4.52	9.54667
Vitvi07g01761	3.761	1.91111	9.61239e-12	6.53673e-10	up	3.28	5.51	17.13	14.74	20.2	4.395	17.3567
Vitvi07g01832	2.504	1.32415	1.17274e-29	9.88901e-27	up	26.59	29.54	72.94	71.31	76.76	28.065	73.67
Vitvi07g01843	2.088	1.06179	1.99706e-05	0.000318698	up	6.98	7.53	13.84	13.76	20.05	7.255	15.8833
Vitvi07g01906	2.005	1.00351	7.69841e-06	0.000141122	up	3.76	4.39	10.19	8.29	7.9	4.075	8.79333
Vitvi07g01916	2.09	1.06362	1.26864e-12	1.07407e-10	up	9.57	12.18	25	23.72	22.56	10.875	23.76
Vitvi07g01943	3.164	1.66177	0.00017671	0.00201037	up	1.14	1.61	5.52	4.44	3.83	1.375	4.59667
Vitvi07g01973	0.3	-1.73475	3.69977e-08	1.25394e-06	down	10.17	6.58	3.74	2.08	2.4	8.375	2.74
Vitvi07g02006	2.552	1.35168	8.12276e-19	1.71236e-16	up	11.55	12.97	36.63	30.61	31.05	12.26	32.7633
Vitvi07g02049	0.425	-1.23567	1.69058e-09	7.68085e-08	down	103.08	91.23	51.36	32.51	43.47	97.155	42.4467
Vitvi07g02075	2.596	1.37639	5.71213e-06	0.000108877	up	2.26	2.56	6.74	6.53	6.54	2.41	6.60333
Vitvi07g02097	3.509	1.81124	1.71865e-22	5.57398e-20	up	22.78	28.33	106.55	80.43	97.38	25.555	94.7867
Vitvi07g02115	0.21	-2.25168	8.12717e-09	3.16648e-07	down	12	16.65	1.96	3.13	4.46	14.325	3.18333
Vitvi07g02120	0.237	-2.07929	0.000592935	0.00538803	down	1.77	4.47	0.7	0.8	0.96	3.12	0.82
Vitvi07g02150	2.436	1.28423	5.18619e-06	0.000100381	up	1.85	3.02	6.84	4.74	7.38	2.435	6.32
Vitvi07g02194	2.405	1.26615	5.66823e-09	2.28038e-07	up	14.87	16.22	46.77	33.74	37.58	15.545	39.3633
Vitvi07g02198	0.498	-1.00523	0.00127747	0.00997791	down	51.34	36.03	28.02	15.22	30.66	43.685	24.6333
Vitvi07g02212	3.363	1.74972	1.82443e-18	3.69815e-16	up	8.99	11.36	37.69	33.99	36.98	10.175	36.22
Vitvi07g02217	0.183	-2.45269	0.0100056	0.049607	down	1.53	2.08	0.76	0.06	0.21	1.805	0.343333
Vitvi07g02267	0.468	-1.09632	0.00598917	0.0335792	down	9.36	8.64	5.35	4.41	3.71	9	4.49
Vitvi07g02318	2.582	1.36859	9.01368e-09	3.45486e-07	up	23.15	23.81	67.19	49.48	76.45	23.48	64.3733
Vitvi07g02320	2.249	1.16913	1.55365e-07	4.61954e-06	up	84.32	80.11	189.69	155.19	246.66	82.215	197.18
Vitvi07g02433	9.85	3.30019	9.89663e-24	3.86353e-21	up	9.09	5.7	74.55	82.18	92.49	7.395	83.0733
Vitvi07g02455	2.907	1.53967	0.00858287	0.0441521	up	3.39	1.24	7.02	7.12	7.76	2.315	7.3
Vitvi07g02574	8.827	3.14195	6.61321e-06	0.000123048	up	0.49	0.13	5	3.65	3.96	0.31	4.20333
Vitvi07g02583	0.367	-1.44536	0.000221312	0.00240613	down	331.9	217.81	128.53	112.63	149.48	274.855	130.213
Vitvi07g02664	0.414	-1.27238	3.14664e-10	1.64194e-08	down	22.62	23.16	10.66	8.34	11.5	22.89	10.1667
Vitvi07g02681	3.046	1.60668	0.00407806	0.0249404	up	1.32	4.16	9.13	8.33	9.12	2.74	8.86
Vitvi07g02983	3.839	1.94091	4.3256e-26	2.2241e-23	up	28.34	37.8	155.71	119.49	126.65	33.07	133.95
Vitvi07g03041	0.495	-1.01446	7.45916e-07	1.85651e-05	down	9.59	9.99	5.33	4.45	5.46	9.79	5.08
Vitvi07g03060	0.295	-1.76256	2.76887e-07	7.68258e-06	down	178.78	125.99	72.79	31.91	40.91	152.385	48.5367
Vitvi07g03091	2.196	1.13462	0.00105697	0.00858648	up	2.1	1.85	5.25	3.27	4.99	1.975	4.50333
Vitvi07g03175	28.742	4.8451	3.12987e-05	0.000467287	up	0.14	0	5.07	4.73	3.9	0.07	4.56667
Vitvi08g00019	2.916	1.54376	1.42852e-13	1.43403e-11	up	13.47	14.07	51.09	37.2	38.85	13.77	42.38
Vitvi08g00117	2.085	1.06008	8.64963e-05	0.00110444	up	6.58	6	15.51	14.05	12.08	6.29	13.88
Vitvi08g00133	4.282	2.09818	6.309e-15	7.77777e-13	up	0.88	1.41	5.51	4.52	5.36	1.145	5.13
Vitvi08g00138	0.474	-1.07647	3.28578e-07	8.89186e-06	down	677.93	441.21	272.45	281.25	288.3	559.57	280.667
Vitvi08g00202	3.686	1.88193	2.67493e-06	5.66735e-05	up	1.18	1.26	5.26	4.19	4.74	1.22	4.73
Vitvi08g00214	3.688	1.88276	2.78543e-09	1.20081e-07	up	3.02	2.24	11.01	9.33	10.38	2.63	10.24
Vitvi08g00219	0.42	-1.25129	8.39341e-05	0.00107891	down	18.98	13.25	9.58	5.1	6.7	16.115	7.12667
Vitvi08g00223	0.499	-1.0015	5.53837e-15	6.9914e-13	down	24.24	22.63	13.2	13.45	13.86	23.435	13.5033
Vitvi08g00243	2.365	1.24156	0.000344152	0.00346304	up	4.29	3.7	10.05	10.42	9.69	3.995	10.0533
Vitvi08g00656	0.22	-2.1857	9.6823e-17	1.67305e-14	down	12.99	17.75	3.43	3.01	4.21	15.37	3.55
Vitvi08g00673	0.386	-1.37263	0.00175833	0.0129154	down	6.24	3.13	2.23	1.98	1.51	4.685	1.90667
Vitvi08g00730	0.457	-1.12998	2.31972e-10	1.2475e-08	down	127.7	99.6	57.86	47.77	58.47	113.65	54.7
Vitvi08g00781	4.427	2.14617	5.81152e-27	3.40313e-24	up	2.76	2.31	12.54	10.64	12.05	2.535	11.7433
Vitvi08g00801	0.346	-1.53307	3.15924e-06	6.53988e-05	down	13.26	26.43	6.72	7.27	7.6	19.845	7.19667
Vitvi08g00816	0.352	-1.50775	4.58907e-05	0.000649713	down	16.94	11.28	7.53	3.28	4.84	14.11	5.21667
Vitvi08g00825	2.362	1.24018	4.51994e-09	1.85019e-07	up	4.8	4.46	12.57	9.66	11.45	4.63	11.2267
Vitvi08g00871	3.174	1.66644	4.47645e-05	0.00063462	up	2.26	2.19	9.59	5.81	6.98	2.225	7.46
Vitvi08g00892	0.41	-1.28574	1.27794e-13	1.28901e-11	down	11.43	9.83	4.26	4.37	5.12	10.63	4.58333
Vitvi08g00958	5.32	2.41152	5.45903e-23	1.88659e-20	up	4.04	5.99	31.76	23.13	29.19	5.015	28.0267
Vitvi08g01012	0.485	-1.0427	8.09511e-05	0.00104824	down	6.95	5.38	3.19	2.6	3.62	6.165	3.13667
Vitvi08g01030	0.448	-1.15718	3.67145e-07	9.82205e-06	down	44.28	35.29	20.44	15.42	20.71	39.785	18.8567
Vitvi08g01036	0.412	-1.27884	3.49249e-07	9.39096e-06	down	163.39	137.46	85.82	50.44	66.01	150.425	67.4233
Vitvi08g01055	0.456	-1.13205	3.29246e-11	2.08433e-09	down	48.58	37.18	20.15	20.83	21.34	42.88	20.7733
Vitvi08g01062	2.073	1.05151	0.00146041	0.0110983	up	2.26	2.15	4.43	4.95	5.97	2.205	5.11667
Vitvi08g01075	2.003	1.00206	1.72248e-08	6.3593e-07	up	13.15	17.19	32.86	27.41	34.56	15.17	31.61
Vitvi08g01077	3.197	1.6765	2.89068e-11	1.86356e-09	up	1.42	1.29	5.09	4.24	4.18	1.355	4.50333
Vitvi08g01087	4.162	2.05712	1.24574e-22	4.16847e-20	up	1.86	1.75	7.77	6.83	8.89	1.805	7.83
Vitvi08g01112	2.586	1.37098	4.62706e-13	4.20444e-11	up	14.92	16.5	52.18	38.3	37.11	15.71	42.53
Vitvi08g01189	2.811	1.49102	3.81864e-06	7.65217e-05	up	2.19	1.81	5.82	5.84	6.12	2	5.92667
Vitvi08g01197	4.361	2.12482	9.98231e-11	5.7029e-09	up	0.78	1.32	5.61	4.21	4.54	1.05	4.78667
Vitvi08g01206	2.18	1.12459	1.8918e-08	6.93583e-07	up	24.53	25.98	65.95	45.26	62.41	25.255	57.8733
Vitvi08g01217	0.225	-2.15485	7.55497e-13	6.6361e-11	down	262.22	273.36	86.95	36.09	66.22	267.79	63.0867
Vitvi08g01241	0.345	-1.53469	0.000121746	0.00146995	down	3.07	2	1	0.89	0.86	2.535	0.916667
Vitvi08g01242	0.304	-1.71554	1.14991e-10	6.51648e-09	down	50.77	38.49	16.09	10.85	16.37	44.63	14.4367
Vitvi08g01299	0.458	-1.12564	1.0232e-08	3.87951e-07	down	175.07	195.54	111.35	71.58	83.95	185.305	88.96
Vitvi08g01301	0.49	-1.03022	2.21548e-07	6.30292e-06	down	35.29	27.92	17	14.21	17.15	31.605	16.12
Vitvi08g01357	2.56	1.35606	4.20829e-13	3.85718e-11	up	6.35	7.42	21.28	17.07	17.18	6.885	18.51
Vitvi08g01384	2.086	1.06049	3.0449e-07	8.34715e-06	up	7.04	8.05	18.89	13.95	16.66	7.545	16.5
Vitvi08g01412	0.465	-1.10339	8.04902e-07	1.98923e-05	down	21.62	19.35	12.62	8.36	9.05	20.485	10.01
Vitvi08g01433	3.093	1.62886	9.08999e-16	1.30358e-13	up	7.13	8.67	27.39	22.33	27.41	7.9	25.71
Vitvi08g01436	2.741	1.45483	4.86536e-15	6.21616e-13	up	3.57	3.82	10.42	9.31	12.06	3.695	10.5967
Vitvi08g01537	2.453	1.29453	5.50654e-10	2.75732e-08	up	19.31	21.26	64.02	40.24	51.89	20.285	52.05
Vitvi08g01543	2.25	1.16993	0.00147484	0.0111839	up	2.38	3.41	6.29	4.91	6.56	2.895	5.92
Vitvi08g01546	0.473	-1.08047	1.07258e-07	3.27222e-06	down	66.58	47.31	30.57	24.61	29.73	56.945	28.3033
Vitvi08g01547	0.23	-2.12057	1.7547e-06	3.91851e-05	down	6.39	5.75	1.09	0.84	2.37	6.07	1.43333
Vitvi08g01606	4.352	2.12164	3.78243e-14	4.19671e-12	up	6.47	7.55	44.29	22.71	29.58	7.01	32.1933
Vitvi08g01611	0.252	-1.98975	6.54727e-05	0.000875863	down	4.21	3.7	1.69	0.53	0.91	3.955	1.04333
Vitvi08g01633	3.059	1.61315	0.00697885	0.037736	up	0.92	1.36	2.62	2.19	1.71	1.14	2.17333
Vitvi08g01641	0.5	-1.0002	3.59797e-06	7.3072e-05	down	16.43	14.47	8.05	6.64	9.58	15.45	8.09
Vitvi08g01701	0.296	-1.75614	2.36464e-15	3.13515e-13	down	822.83	600.92	253.86	169.19	245.27	711.875	222.773
Vitvi08g01736	2.354	1.23511	0.00748561	0.0397091	up	2.55	4.08	6.38	8.68	8.41	3.315	7.82333
Vitvi08g01738	5.365	2.42354	8.55207e-12	5.91102e-10	up	3.31	3.77	23.77	15.27	21.57	3.54	20.2033
Vitvi08g01767	2.785	1.47749	3.65864e-10	1.88577e-08	up	2.04	2.25	6.74	5.27	6.75	2.145	6.25333
Vitvi08g01797	0.495	-1.01469	7.50195e-11	4.44238e-09	down	59.96	49.22	29.8	27.11	28.35	54.59	28.42
Vitvi08g01822	4.385	2.13245	1.0626e-11	7.1797e-10	up	0.81	1.47	5.28	5.55	4.86	1.14	5.23
Vitvi08g01843	0.494	-1.0162	0.000377779	0.00374071	down	97.24	76.35	60.15	29.32	46.04	86.795	45.17
Vitvi08g01851	3.259	1.70456	3.87403e-06	7.74108e-05	up	2.03	3.75	11.6	8.26	9.86	2.89	9.90667
Vitvi08g01853	2.669	1.41611	6.12345e-08	1.97989e-06	up	3.79	5	13.29	9.14	14.38	4.395	12.27
Vitvi08g01867	0.494	-1.01846	3.6107e-12	2.77763e-10	down	131.39	119.44	69.59	56.48	68.8	125.415	64.9567
Vitvi08g01902	2.148	1.10274	1.94722e-07	5.64642e-06	up	4.16	5.35	12.7	9.49	9.79	4.755	10.66
Vitvi08g01904	6.325	2.66114	1.39466e-10	7.69653e-09	up	3.29	1.3	19.15	11.85	14.98	2.295	15.3267
Vitvi08g01962	3.842	1.94184	7.35592e-06	0.000135432	up	1.91	0.88	7.69	4.01	5.21	1.395	5.63667
Vitvi08g02080	2.437	1.28539	0.0013179	0.0102142	up	1.72	1.84	3.4	4.35	5.95	1.78	4.56667
Vitvi08g02130	2.029	1.02069	1.10982e-07	3.37606e-06	up	29.58	11.53	56.58	66.48	41	20.555	54.6867
Vitvi08g02139	2.046	1.03292	1.24976e-06	2.93714e-05	up	3.69	4.09	6.66	8.34	9.93	3.89	8.31
Vitvi08g02143	0.453	-1.1431	1.32272e-05	0.000225236	down	132.7	126.59	70.62	45.1	76.54	129.645	64.0867
Vitvi08g02159	0.223	-2.16489	0.00033663	0.00339545	down	4.93	1.93	1	1.03	0.38	3.43	0.803333
Vitvi08g02169	0.435	-1.20152	9.24574e-06	0.000165458	down	29.04	36.23	16.65	17.8	11.64	32.635	15.3633
Vitvi08g02176	3.111	1.63736	1.68266e-06	3.79382e-05	up	1.47	1.4	5.4	4.73	3.91	1.435	4.68
Vitvi08g02217	0.259	-1.94929	2.56803e-08	9.16016e-07	down	7.17	4.54	1.44	1.34	2	5.855	1.59333
Vitvi08g02220	0.272	-1.88091	5.06089e-06	9.81497e-05	down	4.54	2.47	1.12	1.2	0.67	3.505	0.996667
Vitvi08g02233	2.007	1.00522	4.20798e-07	1.10885e-05	up	4.17	4.2	8.72	8.71	9.02	4.185	8.81667
Vitvi08g02253	2.996	1.58302	1.26954e-05	0.000217234	up	2.8	4.79	15.46	10.52	10.12	3.795	12.0333
Vitvi08g02274	0.46	-1.11875	0.00757509	0.0400882	down	14.16	13.08	4.88	5.54	9.71	13.62	6.71
Vitvi08g02327	0.419	-1.25626	0.0005178	0.00483853	down	27.79	18.77	11.1	8.97	11.71	23.28	10.5933
Vitvi08g02331	2.757	1.46327	5.14827e-16	7.69721e-14	up	6.85	7.35	21.67	18.45	21.96	7.1	20.6933
Vitvi08g02368	2.505	1.32481	6.04115e-10	2.98269e-08	up	35.23	48.75	130.89	97.23	113.31	41.99	113.81
Vitvi08g02376	0.217	-2.20694	5.57699e-05	0.000767418	down	834.93	564.7	207.2	72.41	186.86	699.815	155.49
Vitvi08g02385	3.658	1.87104	9.34626e-10	4.46777e-08	up	16.01	22.45	103.08	62.43	63.26	19.23	76.2567
Vitvi08g02386	2.545	1.34793	7.18635e-07	1.79497e-05	up	12.84	14.26	41.29	32.57	38.1	13.55	37.32
Vitvi09g00030	2.552	1.35184	2.51914e-11	1.63403e-09	up	24.22	31.63	85.14	58.66	79.59	27.925	74.4633
Vitvi09g00045	2.089	1.06269	3.28267e-06	6.73825e-05	up	35.93	47.54	88.35	77.98	112.2	41.735	92.8433
Vitvi09g00112	2.252	1.17095	9.13786e-06	0.000163666	up	7.48	8.6	15.09	23.18	18.94	8.04	19.07
Vitvi09g00126	0.396	-1.33584	2.8771e-12	2.25472e-10	down	59.82	51.36	28.02	21.45	19.87	55.59	23.1133
Vitvi09g00143	2.563	1.35804	8.74729e-06	0.000158013	up	2.01	2.94	6.77	5.43	7.79	2.475	6.66333
Vitvi09g00183	2.233	1.15911	4.97751e-11	3.05283e-09	up	19.72	21.88	43.73	44.18	57.88	20.8	48.5967
Vitvi09g00193	0.264	-1.92091	1.39181e-10	7.69653e-09	down	50.09	90.74	13.64	24	20.27	70.415	19.3033
Vitvi09g00205	0.32	-1.64541	4.22635e-09	1.73338e-07	down	32.47	29.45	9.85	6.89	14.28	30.96	10.34
Vitvi09g00225	0.49	-1.02856	1.55696e-12	1.29222e-10	down	30.67	25.99	13.92	14.29	15.89	28.33	14.7
Vitvi09g00275	0.456	-1.1314	3.56012e-08	1.21639e-06	down	129.31	103.26	59.53	45.06	63.66	116.285	56.0833
Vitvi09g00311	2.721	1.4441	0.00010663	0.00131454	up	2.43	2.04	6.61	4.68	7.88	2.235	6.39
Vitvi09g00355	0.498	-1.00458	2.21003e-07	6.29591e-06	down	78.74	64.3	41.8	31.99	39.47	71.52	37.7533
Vitvi09g00399	0.439	-1.1893	0.00434338	0.0262057	down	7.06	3.19	3.19	1.93	1.87	5.125	2.33
Vitvi09g00443	2.455	1.29585	8.52427e-06	0.000154382	up	2.05	1.77	4.41	4.36	6.01	1.91	4.92667
Vitvi09g00477	0.482	-1.05402	1.9672e-06	4.32436e-05	down	11.6	16.54	6.16	6.49	8.42	14.07	7.02333
Vitvi09g00478	0.386	-1.37257	2.99402e-09	1.27252e-07	down	11.59	19.47	6.18	5.91	6.68	15.53	6.25667
Vitvi09g00486	3.014	1.59146	6.40967e-11	3.82782e-09	up	2.21	1.68	6.44	6.51	5.43	1.945	6.12667
Vitvi09g00493	2.241	1.164	1.67773e-05	0.000275239	up	2.32	3.3	7.23	5.26	7.44	2.81	6.64333
Vitvi09g00512	2.518	1.33242	1.49185e-20	3.9312e-18	up	13.95	15.11	41.01	36.44	37.83	14.53	38.4267
Vitvi09g00528	2.336	1.22426	1.64415e-06	3.71892e-05	up	5.55	7.29	18.41	14.26	14.72	6.42	15.7967
Vitvi09g00817	2.154	1.10709	0.00153875	0.0115645	up	4.19	5.72	14.52	7.14	11.94	4.955	11.2
Vitvi09g00829	2.16	1.11109	8.99681e-09	3.45468e-07	up	6.39	6.75	15.46	13.74	15.52	6.57	14.9067
Vitvi09g00988	0.468	-1.09584	5.33652e-07	1.3753e-05	down	50.94	34.56	19.77	18.96	23.97	42.75	20.9
Vitvi09g01012	2.245	1.16658	1.13416e-11	7.56622e-10	up	3.93	3.74	9.95	8.27	8.77	3.835	8.99667
Vitvi09g01155	2.072	1.05098	0.000127554	0.00153043	up	13.57	14.02	39.9	24.78	26.3	13.795	30.3267
Vitvi09g01266	4.947	2.30667	2.2963e-08	8.30331e-07	up	0.95	1.26	6.54	4.06	6.6	1.105	5.73333
Vitvi09g01282	5.221	2.38431	1.49285e-21	4.4325e-19	up	25.21	22.66	166.78	93.74	136.26	23.935	132.26
Vitvi09g01409	0.235	-2.08914	2.02551e-09	9.0084e-08	down	9.25	16.89	3.51	2.98	2.99	13.07	3.16
Vitvi09g01412	0.255	-1.9687	6.27406e-08	2.01008e-06	down	7.57	6.51	2.71	1.31	1.62	7.04	1.88
Vitvi09g01469	9.871	3.30326	1.19228e-26	6.61431e-24	up	1.75	0.9	14.72	13.72	12.73	1.325	13.7233
Vitvi09g01493	2.417	1.27293	0.00227526	0.0158299	up	3.69	2.36	8.81	6.09	8.41	3.025	7.77
Vitvi09g01553	0.487	-1.03861	0.00107367	0.0086887	down	139.47	232.22	151.39	91.99	74.37	185.845	105.917
Vitvi09g01554	0.381	-1.39337	0.00151025	0.0113827	down	1339.09	1734.42	937.65	397.96	575.9	1536.76	637.17
Vitvi09g01571	4.393	2.13532	3.13667e-24	1.29655e-21	up	1.85	1.91	8.35	8.05	9.02	1.88	8.47333
Vitvi09g01664	0.318	-1.65368	1.60503e-07	4.75887e-06	down	25.27	28.18	8.76	12.16	5.96	26.725	8.96
Vitvi09g01665	0.324	-1.62807	2.92616e-10	1.54216e-08	down	56.84	50.64	14.59	22.81	18.5	53.74	18.6333
Vitvi09g01986	2.065	1.0463	4.16359e-05	0.000596687	up	5.59	7.36	16.09	12.25	13.09	6.475	13.81
Vitvi09g02014	0.395	-1.34118	1.58057e-06	3.58665e-05	down	35.92	28.78	16.77	10.51	13.54	32.35	13.6067
Vitvi09g02103	0.312	-1.68199	1.35885e-05	0.000230457	down	7.11	7.63	2.22	2.9	2.15	7.37	2.42333
Vitvi10g00002	6.163	2.62353	1.36392e-12	1.14098e-10	up	0.58	0.87	4.65	5.03	4.41	0.725	4.69667
Vitvi10g00059	3.856	1.9472	9.99042e-16	1.40405e-13	up	21.2	15.79	77.75	66.46	86.47	18.495	76.8933
Vitvi10g00114	0.478	-1.06494	4.48424e-06	8.81524e-05	down	77.98	72.06	47.14	27.13	38.68	75.02	37.65
Vitvi10g00131	3.471	1.79537	8.02951e-12	5.58647e-10	up	1.13	1.26	3.83	3.95	5.14	1.195	4.30667
Vitvi10g00164	3.363	1.7499	1.61018e-10	8.83966e-09	up	1.96	3.36	10.2	8.38	9.53	2.66	9.37
Vitvi10g00204	0.461	-1.1175	2.99408e-07	8.23998e-06	down	43.93	44.15	25.41	15.49	22.5	44.04	21.1333
Vitvi10g00236	0.439	-1.18617	0.00490982	0.0287431	down	268.79	173.55	126.4	129.95	134.32	221.17	130.223
Vitvi10g00264	2.268	1.18131	1.42304e-05	0.000239077	up	3.6	3.79	10.63	7.03	10.29	3.695	9.31667
Vitvi10g00290	2.151	1.10507	6.28829e-06	0.000117939	up	2.42	2.39	5.51	5.07	5.72	2.405	5.43333
Vitvi10g00442	3.328	1.73479	7.36732e-20	1.70671e-17	up	17.12	23.25	78.76	59.93	72.6	20.185	70.43
Vitvi10g00523	2.222	1.15182	1.96934e-07	5.7027e-06	up	7.24	9.39	18.25	17.28	22.61	8.315	19.38
Vitvi10g00602	2.839	1.5055	1.76043e-14	2.05036e-12	up	8.43	7.38	27.08	20.8	22.76	7.905	23.5467
Vitvi10g00617	3.089	1.62717	3.83038e-05	0.00055421	up	3.37	2.67	11.8	9.06	8.94	3.02	9.93333
Vitvi10g00651	0.478	-1.0636	9.98196e-17	1.71081e-14	down	39.64	32.24	19.52	16.56	21.12	35.94	19.0667
Vitvi10g00694	0.474	-1.07681	0.00024477	0.00261398	down	13.14	8.67	6.38	5.3	4.63	10.905	5.43667
Vitvi10g00740	2.457	1.29667	2.66911e-13	2.59297e-11	up	53.9	48.44	156.2	114.69	128.89	51.17	133.26
Vitvi10g00754	2.096	1.06772	6.09337e-07	1.54951e-05	up	4.16	5.13	12.18	8.16	10.58	4.645	10.3067
Vitvi10g00868	0.225	-2.15438	0.00964144	0.0483586	down	0.84	1.98	0.12	0.59	0.29	1.41	0.333333
Vitvi10g00869	0.229	-2.12842	0.00739766	0.0394112	down	1.47	6.07	0.23	1.27	1.21	3.77	0.903333
Vitvi10g01035	4.862	2.28147	7.47358e-44	1.75056e-40	up	6.05	5.41	31.37	27.23	29.02	5.73	29.2067
Vitvi10g01136	2.788	1.47927	2.91929e-14	3.27349e-12	up	13.83	12.06	40.56	32.96	40.71	12.945	38.0767
Vitvi10g01237	2.993	1.58138	2.99681e-06	6.26121e-05	up	6.44	7.62	26.05	18	23.77	7.03	22.6067
Vitvi10g01388	2.062	1.04424	4.05326e-12	3.05167e-10	up	13.18	14.85	29.49	28.57	32.62	14.015	30.2267
Vitvi10g01391	0.252	-1.98768	7.19046e-06	0.000132945	down	4.36	11.31	2.2	2.34	1.59	7.835	2.04333
Vitvi10g01392	0.173	-2.53318	0.00502153	0.0292526	down	4.72	6.77	0.23	0.4	0.09	5.745	0.24
Vitvi10g01394	2.307	1.20596	4.71818e-08	1.56236e-06	up	1.79	2.25	4.41	4.52	5.67	2.02	4.86667
Vitvi10g01549	2.609	1.38365	5.96276e-08	1.93089e-06	up	9.47	9.69	31.2	21.23	27.04	9.58	26.49
Vitvi10g01595	0.127	-2.97797	6.95136e-07	1.74229e-05	down	2.57	7.56	0.65	0.59	0.82	5.065	0.686667
Vitvi10g01596	0.337	-1.5688	0.00892435	0.04552	down	3.04	11.83	2.66	3.82	1.48	7.435	2.65333
Vitvi10g01599	0.22	-2.18641	0.00223167	0.0155833	down	1.06	5.18	0.84	0.86	0.39	3.12	0.696667
Vitvi10g01616	3.216	1.68544	2.26716e-12	1.83118e-10	up	8.98	12.83	35.31	34.24	42.07	10.905	37.2067
Vitvi10g01641	0.42	-1.25148	6.97647e-08	2.20496e-06	down	148.33	107.09	54.47	57.92	61.57	127.71	57.9867
Vitvi10g01652	4.925	2.30018	7.37523e-15	8.98712e-13	up	1.62	1.14	8.66	6.17	8.02	1.38	7.61667
Vitvi10g01653	3.699	1.88727	0.000272298	0.00285873	up	0.88	1.65	4.81	5.39	4.53	1.265	4.91
Vitvi10g01688	2.241	1.16405	5.21545e-05	0.000725243	up	10.01	11.09	28.99	24.03	23.3	10.55	25.44
Vitvi10g01737	3.009	1.58949	0.00101845	0.00833787	up	6.89	3.91	13.03	16.28	23.62	5.4	17.6433
Vitvi10g01764	0.354	-1.49773	6.09171e-11	3.67964e-09	down	23.3	15.54	6.56	6.62	8.47	19.42	7.21667
Vitvi10g01782	0.184	-2.44468	9.09501e-05	0.00115154	down	5.81	4.31	1.38	0.24	1.32	5.06	0.98
Vitvi10g01788	3.527	1.8184	7.00339e-06	0.000129735	up	2.3	1.93	9.52	5.29	8.8	2.115	7.87
Vitvi10g02054	0.403	-1.311	0.00302119	0.0198164	down	8.16	7.79	2.91	2.45	5.04	7.975	3.46667
Vitvi10g02069	2.653	1.4078	1.66177e-07	4.89955e-06	up	3.29	3.51	9.07	10.51	8.94	3.4	9.50667
Vitvi10g02215	2.577	1.36585	2.98754e-14	3.3323e-12	up	3.75	3.82	10.51	9.53	11.54	3.785	10.5267
Vitvi10g02256	2.375	1.2477	5.65607e-12	4.1258e-10	up	65.35	72.85	208.87	143.43	165.76	69.1	172.687
Vitvi10g02268	2.038	1.02724	0.00456287	0.027174	up	1.71	2.45	4.13	5.23	4.53	2.08	4.63
Vitvi10g02336	3.314	1.72854	3.78841e-10	1.93843e-08	up	1.58	1.49	5.45	4.65	5.95	1.535	5.35
Vitvi10g02337	3.571	1.83642	4.61676e-25	2.07077e-22	up	7.93	8.26	34.59	27.52	27.3	8.095	29.8033
Vitvi10g02411	0.366	-1.45111	0.00032229	0.00327274	down	7.52	6.16	2.63	2.51	3.75	6.84	2.96333
Vitvi11g00012	0.351	-1.51097	0.00181027	0.0132095	down	159.65	123.63	50.92	33.32	75.92	141.64	53.3867
Vitvi11g00017	2.024	1.01692	0.00276683	0.0184522	up	2.51	2.97	6.58	6.58	4.29	2.74	5.81667
Vitvi11g00031	0.319	-1.64779	2.72222e-05	0.000414947	down	6.89	4	1.54	2.57	1.36	5.445	1.82333
Vitvi11g00038	2.094	1.06634	9.19545e-05	0.00116077	up	8.01	5.77	16.27	13.53	16.01	6.89	15.27
Vitvi11g00074	2.247	1.1683	2.28142e-07	6.44886e-06	up	23.33	21.9	67.34	64.64	68.82	22.615	66.9333
Vitvi11g00075	2.257	1.17428	1.93837e-06	4.28611e-05	up	4.42	4.86	13.55	9.87	9.51	4.64	10.9767
Vitvi11g00089	2.013	1.00936	3.68275e-13	3.42009e-11	up	31.01	29.68	67.21	62.13	64.36	30.345	64.5667
Vitvi11g00099	2.515	1.33067	8.26679e-07	2.03827e-05	up	5.59	6.22	16.66	11.52	17.67	5.905	15.2833
Vitvi11g00165	0.412	-1.27901	0.000200607	0.00222813	down	5.64	6.71	2.12	3.66	2.23	6.175	2.67
Vitvi11g00180	0.48	-1.05884	1.0113e-05	0.000179003	down	21.36	15.61	9.12	8.57	9.57	18.485	9.08667
Vitvi11g00195	2.228	1.15583	5.77715e-06	0.000109719	up	5.47	8.03	17.94	14.81	14.71	6.75	15.82
Vitvi11g00250	2.204	1.14024	0.000418193	0.00406264	up	2.34	3.81	6.74	7.21	7.45	3.075	7.13333
Vitvi11g00276	2.079	1.05612	0.00313253	0.0203487	up	1.47	1.92	6.02	2.67	5.86	1.695	4.85
Vitvi11g00309	3.171	1.66515	2.3345e-29	1.75763e-26	up	14.15	17.45	53.19	51.83	53.32	15.8	52.78
Vitvi11g00320	2.616	1.38757	3.28415e-15	4.27365e-13	up	3.83	3.85	10.57	9.6	12.27	3.84	10.8133
Vitvi11g00339	0.408	-1.29442	2.92438e-08	1.02748e-06	down	28.19	27.19	12.04	9.01	14.66	27.69	11.9033
Vitvi11g00351	2.796	1.48331	1.20069e-08	4.51994e-07	up	6.97	6.57	18.43	19.41	22.42	6.77	20.0867
Vitvi11g00383	3.444	1.78422	2.46658e-15	3.24987e-13	up	1.78	2.21	7.97	6.66	6.91	1.995	7.18
Vitvi11g00486	4.519	2.17598	6.07381e-15	7.53188e-13	up	2.12	1.97	10.33	10.06	8.9	2.045	9.76333
Vitvi11g00574	0.437	-1.19584	4.96217e-13	4.47041e-11	down	180.15	133.58	70.61	68.91	75.63	156.865	71.7167
Vitvi11g00598	4.664	2.22154	1.43909e-26	7.77883e-24	up	2.39	2.21	12.15	10.4	11.13	2.3	11.2267
Vitvi11g00670	2.034	1.02421	0.00102182	0.00835722	up	3.08	2.73	6.07	7.05	5.59	2.905	6.23667
Vitvi11g00720	0.234	-2.09402	4.41958e-30	3.88205e-27	down	40.61	34.09	9.63	7.89	9.76	37.35	9.09333
Vitvi11g00734	2.059	1.04206	3.16942e-05	0.000472188	up	6.2	5.92	15.99	10.61	13.05	6.06	13.2167
Vitvi11g00805	2.154	1.10701	0.000389893	0.00383008	up	2.75	3.82	6.71	7.85	7.79	3.285	7.45
Vitvi11g00811	0.484	-1.04654	1.39653e-21	4.20574e-19	down	317.5	322.47	172.83	150.02	165.58	319.985	162.81
Vitvi11g00878	3.865	1.95031	1.41813e-37	1.66087e-34	up	32.14	35.57	140.19	117.42	152.85	33.855	136.82
Vitvi11g00936	2.263	1.17834	8.61702e-09	3.31836e-07	up	2.93	3.27	6.88	6.11	8.52	3.1	7.17
Vitvi11g00948	5.915	2.56432	3.06833e-59	2.15612e-55	up	44.02	55.72	334.94	269.32	323.7	49.87	309.32
Vitvi11g01045	2.953	1.56208	0.000552256	0.00509724	up	2.59	5.23	18.94	7.08	10.16	3.91	12.06
Vitvi11g01075	4.8	2.26318	8.80894e-11	5.12987e-09	up	1.24	1.2	5.22	5.11	8.11	1.22	6.14667
Vitvi11g01098	2.033	1.02376	8.49283e-09	3.28509e-07	up	64.71	65.51	154.57	114.33	152.22	65.11	140.373
Vitvi11g01208	0.233	-2.10306	2.16982e-05	0.000342893	down	54.21	32.41	14.98	6.97	9.75	43.31	10.5667
Vitvi11g01222	6.003	2.5858	5.77841e-11	3.51051e-09	up	0.68	1.81	7.88	8.93	6.67	1.245	7.82667
Vitvi11g01224	2.927	1.5493	3.39977e-09	1.43055e-07	up	2.45	3.83	10.76	9.06	7.89	3.14	9.23667
Vitvi11g01227	7.937	2.98867	4.09283e-11	2.55269e-09	up	0.51	0.84	7.07	6	3.86	0.675	5.64333
Vitvi11g01258	3.309	1.7263	6.28102e-09	2.50303e-07	up	2.34	3.85	13.08	10.16	11.59	3.095	11.61
Vitvi11g01261	2.414	1.27159	0.00841549	0.0434501	up	3.03	6.07	18.34	8.03	8.32	4.55	11.5633
Vitvi11g01341	2.406	1.26661	3.63274e-06	7.37072e-05	up	5.92	3.67	13.04	12.02	11.57	4.795	12.21
Vitvi11g01407	0.477	-1.06935	1.09595e-07	3.3387e-06	down	27.96	25.26	15.52	13.88	11.74	26.61	13.7133
Vitvi11g01438	2.048	1.03388	0.000508584	0.00476722	up	7.41	4.64	15.94	10.92	12.09	6.025	12.9833
Vitvi11g01443	3.763	1.91183	0.00628661	0.0348391	up	1.71	0.62	6.21	3.7	4.25	1.165	4.72
Vitvi11g01445	0.478	-1.06587	2.08059e-09	9.21448e-08	down	50.9	59.03	29.77	25.26	28.7	54.965	27.91
Vitvi11g01457	0.363	-1.46036	4.03296e-05	0.000580333	down	3.56	3.34	1.76	0.95	1.24	3.45	1.31667
Vitvi11g01499	0.473	-1.07912	0.000113766	0.0013855	down	1245.21	1359.16	1026.63	809.43	907.11	1302.18	914.39
Vitvi11g01521	0.437	-1.1947	5.43652e-20	1.28772e-17	down	356.38	373.93	181.24	158.52	180.35	365.155	173.37
Vitvi11g01568	2.488	1.31481	0.00769987	0.040631	up	1.63	2.1	5.39	5.04	4.23	1.865	4.88667
Vitvi11g01702	0.163	-2.62075	1.05647e-18	2.18347e-16	down	17.73	13.94	3.52	2.27	2.32	15.835	2.70333
Vitvi12g00060	2.184	1.12702	0.000165507	0.00190763	up	3.56	3.4	9.92	7.48	6.54	3.48	7.98
Vitvi12g00082	2.983	1.57676	3.91657e-08	1.31831e-06	up	2.51	2.05	7.37	5.72	8.31	2.28	7.13333
Vitvi12g00153	0.414	-1.27267	1.98119e-06	4.34603e-05	down	110.73	209.56	68.08	57.48	81.96	160.145	69.1733
Vitvi12g00189	0.474	-1.07659	2.85457e-07	7.89726e-06	down	18.81	17.21	8.3	10.79	8.42	18.01	9.17
Vitvi12g00195	0.318	-1.65192	0.00214627	0.0151014	down	5.44	5.85	1.08	1.71	2.95	5.645	1.91333
Vitvi12g00202	2.073	1.05138	1.97979e-05	0.000316712	up	4.28	5.81	11.38	9.61	11.92	5.045	10.97
Vitvi12g00206	5.794	2.53449	1.72559e-21	4.91584e-19	up	1.46	2.14	11.05	10.01	11.65	1.8	10.9033
Vitvi12g00208	0.285	-1.81114	3.83049e-06	7.66862e-05	down	5.18	5.96	2.12	1.57	1.3	5.57	1.66333
Vitvi12g00209	0.385	-1.3782	1.24429e-14	1.46541e-12	down	224.55	224.75	109.84	73.89	86.87	224.65	90.2
Vitvi12g00269	4.816	2.26792	1.59609e-29	1.2462e-26	up	4.38	3.96	21.63	18.84	22.8	4.17	21.09
Vitvi12g00278	3.257	1.70352	1.5751e-20	4.09935e-18	up	3.55	3.7	13.45	10.92	12.71	3.625	12.36
Vitvi12g00312	2.22	1.1507	7.45523e-07	1.85651e-05	up	11.03	15.02	34.22	28.14	29.65	13.025	30.67
Vitvi12g00342	2.02	1.01419	3.24565e-07	8.81721e-06	up	33.98	36.32	86.86	60.2	86.53	35.15	77.8633
Vitvi12g00346	2.003	1.00246	1.36529e-10	7.57414e-09	up	12.2	13.02	29.21	25.07	25.22	12.61	26.5
Vitvi12g00355	0.265	-1.91372	6.28907e-12	4.52491e-10	down	79.49	56.31	30.2	17.74	29.77	67.9	25.9033
Vitvi12g00406	3.348	1.74326	7.83262e-14	8.13396e-12	up	1.61	1.71	5.73	5.7	6.02	1.66	5.81667
Vitvi12g00429	0.163	-2.61839	2.65479e-22	8.47963e-20	down	203.76	168.31	40.15	20.4	34.81	186.035	31.7867
Vitvi12g00440	2.861	1.51672	2.17765e-17	3.92368e-15	up	56.22	59.63	210.38	143.96	166.75	57.925	173.697
Vitvi12g00448	2.211	1.14492	2.31202e-09	1.0091e-07	up	3.28	3.18	6.79	7.3	8.33	3.23	7.47333
Vitvi12g00473	3.383	1.75836	5.39318e-05	0.000747001	up	1.74	0.83	3.27	3.49	5.55	1.285	4.10333
Vitvi12g00555	2.089	1.06303	0.000225038	0.00243533	up	9.57	6.86	21.84	16.15	16.62	8.215	18.2033
Vitvi12g00566	2.765	1.46736	3.44118e-05	0.000504906	up	4.12	5.41	18.79	10.4	12.54	4.765	13.91
Vitvi12g00627	2.248	1.16839	4.59934e-12	3.43825e-10	up	12.53	14.94	35.35	31.41	30.76	13.735	32.5067
Vitvi12g00638	2.563	1.3577	5.24778e-09	2.12339e-07	up	7.42	6.03	20.66	16.04	17.86	6.725	18.1867
Vitvi12g00640	3.222	1.68799	5.45102e-09	2.19719e-07	up	2.27	2.44	9.47	6.97	7.42	2.355	7.95333
Vitvi12g00683	2.155	1.10752	3.50727e-07	9.41869e-06	up	16.37	21	32.14	51.71	39.56	18.685	41.1367
Vitvi12g00915	2.01	1.00695	0.00757609	0.0400882	up	2.59	3.33	4.24	9.67	4.7	2.96	6.20333
Vitvi12g01595	2.517	1.33157	9.95351e-05	0.0012388	up	15.16	32.1	80.63	61.25	48.75	23.63	63.5433
Vitvi12g01598	0.171	-2.5517	0.00555322	0.0315716	down	2.11	6.6	0.15	0.54	1.63	4.355	0.773333
Vitvi12g01684	2.146	1.10175	0.00111871	0.00896031	up	1.91	3.16	5.34	6.75	5.06	2.535	5.71667
Vitvi12g01694	2.27	1.18269	0.000772905	0.00667224	up	6.59	9.42	21.17	19.89	15.1	8.005	18.72
Vitvi12g01841	4.471	2.16057	1.00845e-10	5.74574e-09	up	1	1.35	5.38	4.29	5.11	1.175	4.92667
Vitvi12g01984	2.183	1.1266	0.000147931	0.00173638	up	2.58	3.51	6.7	5.77	8.48	3.045	6.98333
Vitvi12g02137	0.305	-1.71548	8.87998e-16	1.28218e-13	down	99.56	117.31	42.44	26.24	35.14	108.435	34.6067
Vitvi12g02200	0.309	-1.69204	0.00946784	0.0476807	down	9.19	5.57	2.67	0.89	3.8	7.38	2.45333
Vitvi12g02272	0.388	-1.36687	3.05189e-13	2.89806e-11	down	45.27	45.83	20.37	15.13	19.94	45.55	18.48
Vitvi12g02273	0.426	-1.22997	0.00252425	0.017199	down	11.61	27.03	5.73	8.26	8.49	19.32	7.49333
Vitvi12g02277	0.314	-1.66971	8.29478e-09	3.2203e-07	down	14.63	13.33	4.87	3.3	5.78	13.98	4.65
Vitvi12g02309	2.432	1.2819	1.97237e-06	4.3312e-05	up	6.29	9	24.64	16.21	17.65	7.645	19.5
Vitvi12g02352	0.434	-1.20454	0.000841332	0.00714302	down	10.71	10.27	5.19	5.3	4.16	10.49	4.88333
Vitvi12g02355	0.099	-3.32977	1.02901e-16	1.74941e-14	down	26.08	19.86	2.2	1.06	3.84	22.97	2.36667
Vitvi12g02361	4.291	2.10136	0.000319119	0.00324835	up	1.59	0.96	3.7	6.6	7.58	1.275	5.96
Vitvi12g02379	2.804	1.48737	0.00503022	0.0292853	up	2.22	3.65	8.83	6.7	10.94	2.935	8.82333
Vitvi12g02431	0.484	-1.04588	0.00060747	0.00549818	down	4.88	4.35	2.58	1.71	2.88	4.615	2.39
Vitvi12g02456	2.509	1.32684	8.51553e-07	2.08973e-05	up	10.47	10.01	30.51	21.99	29.71	10.24	27.4033
Vitvi12g02457	2.145	1.10125	6.94817e-06	0.000128825	up	10.19	9.45	24.95	19.22	23.03	9.82	22.4
Vitvi12g02460	2	1.00019	6.06553e-05	0.000824951	up	21.84	34.97	65.88	47.91	65.35	28.405	59.7133
Vitvi12g02462	2.324	1.21665	3.02885e-11	1.93488e-09	up	112.13	142.66	354.25	299.93	348.39	127.395	334.19
Vitvi12g02465	2.517	1.33155	3.98123e-11	2.49046e-09	up	36.61	45.53	131.58	90.85	121.15	41.07	114.527
Vitvi12g02466	2.038	1.02723	3.68793e-06	7.44685e-05	up	22.11	32.19	66.51	50.82	58.46	27.15	58.5967
Vitvi12g02565	7.344	2.8766	3.67702e-10	1.88601e-08	up	1.68	1.2	10.22	14.52	8.95	1.44	11.23
Vitvi12g02724	0.351	-1.51112	8.50993e-09	3.28567e-07	down	5.24	4.2	1.84	2.52	3.07	4.72	2.47667
Vitvi12g02758	0.23	-2.12328	5.96606e-14	6.35204e-12	down	42.36	30.59	8.87	7.21	10.87	36.475	8.98333
Vitvi13g00004	0.26	-1.94199	8.63071e-19	1.80142e-16	down	38.32	29.35	11.39	8.6	8.01	33.835	9.33333
Vitvi13g00082	3.593	1.84502	1.30459e-07	3.92887e-06	up	2.05	1.36	7.14	7.11	4.94	1.705	6.39667
Vitvi13g00120	3.921	1.97111	1.218e-12	1.03535e-10	up	0.99	1.31	4.85	3.9	5.4	1.15	4.71667
Vitvi13g00122	0.395	-1.34011	5.55151e-06	0.000106489	down	29.7	18.92	11.55	7.15	11.21	24.31	9.97
Vitvi13g00124	0.413	-1.2766	1.67142e-05	0.000274447	down	13.52	10.34	4.57	3.82	7.04	11.93	5.14333
Vitvi13g00153	2.255	1.17344	2.28208e-07	6.44886e-06	up	4.8	6.5	15.25	11.41	13.38	5.65	13.3467
Vitvi13g00172	4.104	2.03715	7.48411e-15	9.06739e-13	up	10.3	10.8	60.86	38.33	37.1	10.55	45.43
Vitvi13g00179	2.168	1.11666	1.22514e-08	4.60376e-07	up	3.39	3.69	8.32	7.27	8.5	3.54	8.03
Vitvi13g00182	2.099	1.06963	1.04736e-13	1.07704e-11	up	9.7	8.77	21.26	18.63	20.92	9.235	20.27
Vitvi13g00195	2.658	1.41014	3.43036e-13	3.22717e-11	up	6.3	7.32	21.36	16.08	19.42	6.81	18.9533
Vitvi13g00241	2.016	1.01135	1.92964e-13	1.9098e-11	up	61.38	70.58	147.13	130.95	146.63	65.98	141.57
Vitvi13g00276	2.476	1.30788	1.28629e-07	3.8793e-06	up	72.05	70.95	225.24	155.07	222.24	71.5	200.85
Vitvi13g00278	4.199	2.07011	6.57365e-05	0.000877638	up	5.89	2.96	13.41	14.73	31.49	4.425	19.8767
Vitvi13g00316	2.859	1.51527	6.0169e-19	1.30765e-16	up	9.94	12.04	36.46	29.57	32.84	10.99	32.9567
Vitvi13g00340	2.217	1.14873	0.000579172	0.00529844	up	5.43	3.65	12.4	9.51	10.1	4.54	10.67
Vitvi13g00367	0.454	-1.13837	0.000616914	0.00555338	down	6.71	4.85	2.65	3.7	1.94	5.78	2.76333
Vitvi13g00387	0.331	-1.59315	0.00303792	0.0199137	down	7.01	2.97	1.46	2.26	1.49	4.99	1.73667
Vitvi13g00390	3.491	1.80348	2.24869e-14	2.56241e-12	up	3.5	4.68	17.8	12.7	14.32	4.09	14.94
Vitvi13g00399	11.836	3.56516	1.1031e-06	2.63656e-05	up	7.91	0.4	66.13	38.97	77.57	4.155	60.89
Vitvi13g00405	2.502	1.32324	0.00702754	0.0379088	up	4.11	4.24	7.66	7.98	17.53	4.175	11.0567
Vitvi13g00409	2.95	1.56067	4.2455e-08	1.42062e-06	up	54.41	69.01	150.78	152.54	272.11	61.71	191.81
Vitvi13g00410	3.401	1.76577	1.2268e-05	0.000211465	up	10.88	12.92	33.67	26.98	68.11	11.9	42.92
Vitvi13g00431	0.449	-1.15374	0.000267624	0.00281948	down	6.02	4.73	3.21	1.93	2.47	5.375	2.53667
Vitvi13g00491	2.768	1.46875	1.18115e-39	1.91538e-36	up	209.29	225.18	641.45	594.15	675.21	217.235	636.937
Vitvi13g00543	3.337	1.73839	0.000412445	0.00401791	up	1.45	0.86	5.15	3.93	3.06	1.155	4.04667
Vitvi13g00622	2.062	1.04394	5.9533e-05	0.00223259	up	91.33	111.88	227.72	188.37	205.7	101.61	207.26
Vitvi13g00706	2.376	1.24836	1.66085e-09	7.57844e-08	up	49.65	63.62	170.84	119.84	146.88	56.635	145.853
Vitvi13g00766	0.49	-1.02923	1.18177e-05	0.000204708	down	23.32	36.07	13.61	14.36	17.75	29.695	15.24
Vitvi13g00777	2.038	1.02711	0.000495864	0.00468242	up	5.3	3.98	9.15	10.9	9.91	4.64	9.98667
Vitvi13g00917	2.118	1.08248	0.00220637	0.0154578	up	7.56	5.11	18.01	12.25	12.58	6.335	14.28
Vitvi13g00925	3.039	1.60357	8.59323e-12	5.92006e-10	up	13.45	13.57	53.56	31.77	43.87	13.51	43.0667
Vitvi13g00974	0.291	-1.78007	7.09098e-17	1.24571e-14	down	163.63	143.11	56.12	38.16	50.15	153.37	48.1433
Vitvi13g01107	2.446	1.29061	6.9362e-12	4.93994e-10	up	26.62	29.97	78.84	77.12	101.29	28.295	85.75
Vitvi13g01130	0.371	-1.43181	3.67189e-06	7.42159e-05	down	5.55	4.3	2.04	1.87	1.84	4.925	1.91667
Vitvi13g01337	2.77	1.46964	2.74572e-12	2.16789e-10	up	130.92	156.73	522.36	319.83	414.86	143.825	419.017
Vitvi13g01396	2.597	1.37696	6.25432e-05	0.000845176	up	1.66	2.7	7.54	4.82	5.42	2.18	5.92667
Vitvi13g01492	2.877	1.52472	8.56301e-26	4.10266e-23	up	14.45	11.87	42.57	39.96	41.78	13.16	41.4367
Vitvi13g01661	0.435	-1.20176	0.000935264	0.00780535	down	7.13	7.38	3.24	3.55	3.35	7.255	3.38
Vitvi13g01691	4.327	2.11349	7.79975e-15	9.34241e-13	up	1.47	1.59	6.96	4.92	7.6	1.53	6.49333
Vitvi13g01699	5.232	2.38748	2.67613e-36	2.96923e-33	up	4	5.02	22.83	22.45	29.39	4.51	24.89
Vitvi13g01743	4.419	2.14378	2.86171e-09	1.22369e-07	up	1.89	0.97	7.07	6.68	6.18	1.43	6.64333
Vitvi13g01768	2.773	1.47161	5.47106e-12	4.0047e-10	up	32.78	44.84	138.94	96.96	106.64	38.81	114.18
Vitvi13g01779	2.299	1.20089	0.00198545	0.0142413	up	2.21	3.34	5.26	9.79	5.01	2.775	6.68667
Vitvi13g01839	0.383	-1.38487	0.00263998	0.0177925	down	8.75	6.69	4.3	2.2	2.93	7.72	3.14333
Vitvi13g01854	5.862	2.55149	1.17534e-35	1.23887e-32	up	16.99	27.87	142.51	144.31	130.4	22.43	139.073
Vitvi13g01898	0.37	-1.43376	6.76667e-08	2.15155e-06	down	252.64	190.09	90.25	84.7	104.86	221.365	93.27
Vitvi13g01899	0.457	-1.13077	9.4234e-05	0.00118247	down	37.67	27.4	15.61	11.83	22.56	32.535	16.6667
Vitvi13g01932	0.252	-1.98983	0.001503	0.0113443	down	4.5	4.4	1.16	1.32	0.47	4.45	0.983333
Vitvi13g01964	2.247	1.1682	0.000298358	0.00307865	up	23.3	35.46	89.6	61.15	72.39	29.38	74.38
Vitvi13g01965	2.411	1.26936	2.45654e-05	0.000381624	up	35.79	30.84	111.84	80.48	85.38	33.315	92.5667
Vitvi13g01980	3.327	1.73422	0.00131556	0.0102036	up	1.89	1.9	3.28	10.52	6.01	1.895	6.60333
Vitvi13g01982	0.41	-1.28721	0.00324094	0.0208809	down	8.16	18.29	5.63	6.57	4.93	13.225	5.71
Vitvi13g02008	4.401	2.13783	1.5572e-21	4.55935e-19	up	9.19	8.56	36.44	33.73	52.11	8.875	40.76
Vitvi13g02009	3.287	1.71665	8.04203e-16	1.1692e-13	up	22.45	23.07	65.65	68.26	100.46	22.76	78.1233
Vitvi13g02194	0.474	-1.07676	1.9068e-08	6.9666e-07	down	19.1	16.41	10.4	9.27	12.29	17.755	10.6533
Vitvi13g02383	0.367	-1.44536	0.00024925	0.00265376	down	6.26	4.03	2.5	1.59	2.61	5.145	2.23333
Vitvi13g02487	0.41	-1.28572	0.00746542	0.0396619	down	17.11	9.2	4.75	4.72	10.84	13.155	6.77
Vitvi13g02488	2.266	1.17989	2.33113e-14	2.64207e-12	up	81.3	79.99	224.57	188.24	176.41	80.645	196.407
Vitvi13g02541	2.769	1.46937	1.70562e-12	1.40454e-10	up	16.62	20.56	64.6	43.36	55.2	18.59	54.3867
Vitvi14g00029	2.628	1.39419	4.7256e-08	1.56236e-06	up	5.53	4.82	15.14	11.53	17.64	5.175	14.77
Vitvi14g00041	3.926	1.97314	1.83146e-16	2.99294e-14	up	2.05	2.76	9.18	9.2	11.43	2.405	9.93667
Vitvi14g00189	3.342	1.74064	1.37332e-17	2.53955e-15	up	64.06	89.89	329.47	227.64	275.05	76.975	277.387
Vitvi14g00220	0.378	-1.40501	0.000436772	0.00421593	down	8.04	10.25	2.15	5.71	1.99	9.145	3.28333
Vitvi14g00247	3.778	1.91748	7.41246e-10	3.59223e-08	up	2.58	2.91	13.45	8.22	11.03	2.745	10.9
Vitvi14g00248	2.492	1.3171	5.2026e-05	0.000723934	up	1.31	1.83	5.16	3.27	4.06	1.57	4.16333
Vitvi14g00286	2.406	1.26652	0.000278872	0.00291467	up	2.85	2.25	7.8	7.34	5.25	2.55	6.79667
Vitvi14g00321	2.66	1.4115	6.49563e-09	2.58367e-07	up	2.12	2.03	5.28	6.4	5.68	2.075	5.78667
Vitvi14g00434	2.159	1.11003	7.9941e-12	5.58025e-10	up	9.76	11.2	26	21	24.03	10.48	23.6767
Vitvi14g00450	2.436	1.28474	1.12971e-05	0.00019731	up	2.2	2.75	6.47	5.36	7.19	2.475	6.34
Vitvi14g00487	0.369	-1.43808	7.3979e-12	5.23339e-10	down	921.24	757.83	267.93	400.89	326.34	839.535	331.72
Vitvi14g00489	2.316	1.21152	1.52586e-15	2.1024e-13	up	41.32	41.3	109.63	93.34	103.02	41.31	101.997
Vitvi14g00821	2.382	1.25239	2.34121e-12	1.88378e-10	up	6.17	6.94	17.54	14.78	17	6.555	16.44
Vitvi14g00902	2.229	1.15628	2.51955e-06	5.39234e-05	up	13.18	18.92	46.73	31.95	34.84	16.05	37.84
Vitvi14g00971	0.133	-2.90807	2.08776e-38	2.93414e-35	down	51.05	55.67	7.49	6.26	8.93	53.36	7.56
Vitvi14g00974	2.566	1.35932	1.24909e-05	0.000214606	up	1.69	1.74	4.84	4.57	4.47	1.715	4.62667
Vitvi14g01128	2.358	1.23755	3.87413e-14	4.27594e-12	up	59.61	53.4	148.7	152.93	126.4	56.505	142.677
Vitvi14g01161	2.58	1.36725	0.000466915	0.00446194	up	2.91	3.24	9.36	8.29	7.84	3.075	8.49667
Vitvi14g01273	0.434	-1.2029	3.40616e-06	6.96463e-05	down	31.66	23.76	14.15	11.33	13.01	27.71	12.83
Vitvi14g01289	0.354	-1.4993	1.44414e-56	7.61096e-53	down	504.72	491.7	177.73	185.93	190.8	498.21	184.82
Vitvi14g01317	2.171	1.1182	4.04941e-05	0.000582302	up	6.85	9.63	17.29	15.42	23.62	8.24	18.7767
Vitvi14g01340	2.399	1.26263	7.14244e-18	1.35648e-15	up	9.5	8.9	23.32	22.04	23.99	9.2	23.1167
Vitvi14g01350	2.506	1.32543	7.3618e-05	0.000965138	up	2.55	2.53	8.67	5.3	6.09	2.54	6.68667
Vitvi14g01423	0.152	-2.71331	0.00216748	0.0152258	down	4.52	1.33	0.86	0.46	0.21	2.925	0.51
Vitvi14g01489	5.931	2.56824	0.00972158	0.0486608	up	0	0.78	1.77	3.14	2.36	0.39	2.42333
Vitvi14g01529	0.478	-1.06457	1.37049e-05	0.000232246	down	128.52	114.99	59.84	49.38	84.04	121.755	64.42
Vitvi14g01542	2.15	1.10464	3.96875e-06	7.90787e-05	up	10.73	11.64	30.17	19.95	25.93	11.185	25.35
Vitvi14g01561	0.446	-1.1648	2.69876e-07	7.5056e-06	down	9.24	9.22	4.97	3.72	5.05	9.23	4.58
Vitvi14g01581	2.5	1.32181	1.00226e-12	8.5889e-11	up	5.8	5.94	15.12	13.45	17.53	5.87	15.3667
Vitvi14g01621	3.636	1.86236	2.12795e-15	2.85728e-13	up	3.18	3.26	14.74	10.17	11.89	3.22	12.2667
Vitvi14g01635	0.305	-1.71136	2.40068e-08	8.60692e-07	down	13.37	13.77	5.97	3.56	3.52	13.57	4.35
Vitvi14g01678	3.689	1.8834	0.00242392	0.016612	up	4.78	8.85	18.65	44.16	17.54	6.815	26.7833
Vitvi14g01684	0.492	-1.02289	1.06103e-09	4.98165e-08	down	341.86	284.94	173.01	134.63	154.51	313.4	154.05
Vitvi14g01745	2.698	1.43189	2.38947e-10	1.27849e-08	up	28.06	38.13	104.81	70.16	105.44	33.095	93.47
Vitvi14g01913	0.295	-1.76262	0.000120197	0.00145374	down	14.82	6.66	5.22	2.47	2.4	10.74	3.36333
Vitvi14g01922	3.297	1.7211	4.14282e-11	2.57625e-09	up	2.79	2.66	10.62	11.27	10.3	2.725	10.73
Vitvi14g01929	5.037	2.33246	2.37683e-41	4.55508e-38	up	39.87	47.94	271.6	195.26	228.48	43.905	231.78
Vitvi14g01953	3.083	1.62428	1.52835e-14	1.78995e-12	up	2.34	3	8.24	7.58	9.99	2.67	8.60333
Vitvi14g02013	0.399	-1.32487	1.23892e-19	2.80836e-17	down	113.01	98.6	44.86	40.58	47.84	105.805	44.4267
Vitvi14g02039	3.743	1.90407	1.37408e-12	1.14494e-10	up	2.01	2.97	11.12	8.48	10.2	2.49	9.93333
Vitvi14g02433	2.109	1.0767	5.7298e-05	0.000786393	up	12.51	18.66	38.84	37.27	28.88	15.585	34.9967
Vitvi14g02440	2.414	1.2713	0.00103991	0.00847734	up	7.82	9.38	16.35	25.73	24.74	8.6	22.2733
Vitvi14g02461	2.358	1.23733	4.07209e-06	8.09846e-05	up	4.65	8.2	17.28	15.29	15.18	6.425	15.9167
Vitvi14g02498	0.315	-1.66556	0.00121972	0.00960869	down	9.12	6.8	2.45	3.83	1.71	7.96	2.66333
Vitvi14g02545	8.316	3.05592	3.14853e-31	3.01701e-28	up	2.98	2.48	24.21	23.54	25.01	2.73	24.2533
Vitvi14g02546	24.265	4.60079	2.69693e-101	5.6854e-97	up	3.76	3.15	94.78	82.83	86.3	3.455	87.97
Vitvi14g02549	16.267	4.02384	1.98508e-07	5.7404e-06	up	0	0.73	7.82	5.46	6.5	0.365	6.59333
Vitvi14g02550	8.556	3.09686	2.25128e-09	9.86677e-08	up	1.58	0.62	11.28	8.51	9.9	1.1	9.89667
Vitvi14g02551	2.749	1.45881	6.13349e-18	1.18624e-15	up	70.23	88.86	251.01	196.22	244.91	79.545	230.713
Vitvi14g02558	3.092	1.62853	2.02192e-10	1.09856e-08	up	2.61	1.85	8.45	6.78	6.33	2.23	7.18667
Vitvi14g02642	2.781	1.47574	0.000510424	0.00477808	up	1.36	3.27	6.31	7.18	6.84	2.315	6.77667
Vitvi14g02665	0.428	-1.22376	6.9332e-13	6.14673e-11	down	60.98	54.34	27.5	21.21	25.16	57.66	24.6233
Vitvi14g02876	2.86	1.51593	4.23765e-19	9.30562e-17	up	162.1	213.49	679.77	523.71	515.79	187.795	573.09
Vitvi14g02893	2.104	1.07288	0.00521163	0.0300592	up	32.72	31.69	51.91	53.6	112.86	32.205	72.79
Vitvi14g02898	8.455	3.07972	7.72348e-16	1.13125e-13	up	1.07	0.64	6.93	7	8.75	0.855	7.56
Vitvi14g02928	0.338	-1.56653	9.6072e-10	4.57177e-08	down	12.17	10.72	2.94	4.94	4.28	11.445	4.05333
Vitvi14g02936	7.207	2.84942	1.06483e-24	4.67659e-22	up	5.38	9.18	64.77	46.28	55.08	7.28	55.3767
Vitvi14g02966	2.34	1.2263	0.000980911	0.00808705	up	2.3	4.2	7.14	8.13	8.77	3.25	8.01333
Vitvi14g02987	0.47	-1.08856	1.44798e-06	3.31431e-05	down	15.07	11.14	5.85	6.69	7.38	13.105	6.64
Vitvi14g03020	2.104	1.07314	0.00088418	0.0074231	up	5.19	4.77	10.52	8.62	11.45	4.98	10.1967
Vitvi14g03084	2.402	1.26448	3.40743e-07	9.17394e-06	up	172.34	215.19	683.26	386.19	412.54	193.765	493.997
Vitvi14g03086	0.314	-1.67255	0.00270802	0.0181404	down	6.38	5.4	2.48	2.33	1.1	5.89	1.97
Vitvi15g00248	3.83	1.93731	1.71079e-15	2.32678e-13	up	1.66	2.65	10.28	7.97	8.55	2.155	8.93333
Vitvi15g00357	6.625	2.72795	1.37784e-09	6.3144e-08	up	0.91	0.8	6.53	5.08	6.34	0.855	5.98333
Vitvi15g00547	2.197	1.13551	2.683e-08	9.53801e-07	up	31.15	38.38	97.45	78.28	67.51	34.765	81.08
Vitvi15g00643	5.828	2.54303	9.10682e-06	0.000163249	up	1.54	0.45	5.97	3.88	8.21	0.995	6.02
Vitvi15g00704	0.338	-1.56421	1.65565e-22	5.45357e-20	down	467.01	486.18	203.49	153.63	150.38	476.595	169.167
Vitvi15g00754	2.759	1.46422	6.55745e-06	0.000122442	up	3.29	2.57	9.49	6.4	9.9	2.93	8.59667
Vitvi15g00782	2.183	1.12655	0.00197607	0.0141929	up	3.56	2.49	8.84	5.32	6.71	3.025	6.95667
Vitvi15g00816	2.918	1.54521	1.09914e-13	1.1248e-11	up	30.23	38.01	130.7	84.74	97.81	34.12	104.417
Vitvi15g00835	0.168	-2.57733	3.55856e-28	2.20641e-25	down	38.33	35.66	6.1	5.12	8.32	36.995	6.51333
Vitvi15g00857	2.192	1.1322	5.97408e-07	1.52285e-05	up	8.37	8.1	23	16.7	17.26	8.235	18.9867
Vitvi15g00894	2.818	1.49462	9.27074e-11	5.35442e-09	up	4.57	4.98	12.41	12.46	17.43	4.775	14.1
Vitvi15g00915	2.083	1.05851	0.00095089	0.00790446	up	3.05	2.63	7.67	4.58	6.38	2.84	6.21
Vitvi15g00964	2.181	1.12518	0.000948133	0.00788776	up	3.66	4.36	8.47	6.32	12.71	4.01	9.16667
Vitvi15g01019	3.332	1.73639	5.88887e-07	1.50295e-05	up	6.27	4.33	20.34	17.52	19.09	5.3	18.9833
Vitvi15g01034	2.966	1.56847	6.8557e-16	1.01778e-13	up	65.19	62.21	171.63	171.92	248.33	63.7	197.293
Vitvi15g01083	3.208	1.68178	0.000168609	0.00193387	up	3.32	2.6	12.85	7.06	10.51	2.96	10.14
Vitvi15g01087	2.203	1.13955	0.00175715	0.0129113	up	5.02	8.3	20.48	14.7	11.26	6.66	15.48
Vitvi15g01206	0.024	-5.3814	0.00518058	0.0299269	down	0	7.59	0	0.13	0.15	3.795	0.0933333
Vitvi15g01371	2.711	1.43884	2.50927e-05	0.000388385	up	2.64	3.98	11.21	8.97	8.31	3.31	9.49667
Vitvi15g01499	0.421	-1.24701	6.15753e-05	0.00083477	down	9.73	7.37	4.78	2.96	3.61	8.55	3.78333
Vitvi15g01552	0.454	-1.14047	3.75565e-05	0.000545267	down	53.45	38.71	27.45	17.3	22.21	46.08	22.32
Vitvi15g01621	3.144	1.65253	0.000140635	0.0016637	up	1.29	2.93	7.38	6.87	6.83	2.11	7.02667
Vitvi15g01730	0.084	-3.56569	0.00733348	0.0392179	down	0.08	5.87	0.22	0.38	0.18	2.975	0.26
Vitvi16g00057	0.393	-1.34916	0.00225419	0.0157093	down	6	15.24	2.6	5.82	4.61	10.62	4.34333
Vitvi16g00097	0.46	-1.11998	1.86231e-21	5.23458e-19	down	53.46	50.18	26.01	24.32	25.52	51.82	25.2833
Vitvi16g00098	2.123	1.08631	3.19826e-06	6.59713e-05	up	5.86	6.93	17.06	13.24	12.61	6.395	14.3033
Vitvi16g00165	2.568	1.36074	2.70042e-13	2.61135e-11	up	2.06	1.99	5.13	5.19	6	2.025	5.44
Vitvi16g00170	2.275	1.18581	6.31009e-11	3.78983e-09	up	3.08	3.54	9.06	7.53	7.95	3.31	8.18
Vitvi16g00253	0.425	-1.23526	0.00273257	0.018266	down	33.65	26.36	8.35	20.45	12.13	30.005	13.6433
Vitvi16g00280	2.404	1.26548	7.36531e-06	0.000135487	up	2.38	3.7	7.66	7.32	7.6	3.04	7.52667
Vitvi16g00627	2.779	1.47461	1.3158e-10	7.35768e-09	up	2.99	3.35	8.23	8.02	11.62	3.17	9.29
Vitvi16g00681	2.086	1.061	9.77777e-10	4.63202e-08	up	76.16	83.75	145.43	196.14	187.32	79.955	176.297
Vitvi16g00715	2.592	1.37434	2.73798e-09	1.1852e-07	up	2.88	2.61	8.32	6.86	7.18	2.745	7.45333
Vitvi16g00717	0.077	-3.70201	5.53847e-15	6.9914e-13	down	8.83	8.95	1.29	0.35	0.56	8.89	0.733333
Vitvi16g00744	4.1	2.03579	0.0003306	0.00334423	up	0.59	1.41	5.85	2.92	4.17	1	4.31333
Vitvi16g00808	2.408	1.26791	1.66814e-09	7.59526e-08	up	6.1	7.87	19.82	14.39	18.86	6.985	17.69
Vitvi16g00817	0.489	-1.03274	4.72165e-12	3.51721e-10	down	29.59	29.45	15.82	14.18	15.61	29.52	15.2033
Vitvi16g00836	3.614	1.8535	2.93006e-19	6.50196e-17	up	3.95	4.29	16.59	12.72	17.47	4.12	15.5933
Vitvi16g00925	0.412	-1.28051	7.82493e-05	0.00101763	down	114.78	58.83	43.44	23.57	30.37	86.805	32.46
Vitvi16g00993	0.35	-1.51264	0.000147164	0.00172929	down	6.98	17.36	4.18	5.55	4.32	12.17	4.68333
Vitvi16g00995	0.182	-2.46194	1.27865e-05	0.000218438	down	5.02	18.45	1.26	3.16	2.26	11.735	2.22667
Vitvi16g01050	0.331	-1.59379	4.39407e-08	1.46801e-06	down	10.75	9.78	4.7	2.33	4.14	10.265	3.72333
Vitvi16g01063	3.147	1.65387	2.33858e-08	8.42729e-07	up	1.91	2.12	7.31	4.89	8.26	2.015	6.82
Vitvi16g01082	0.366	-1.44896	0.00184459	0.0134227	down	2.71	6.81	1.89	1.36	2.25	4.76	1.83333
Vitvi16g01103	6.518	2.70453	1.05753e-20	2.85819e-18	up	1.39	2.06	9.51	10.97	14.87	1.725	11.7833
Vitvi16g01191	2.708	1.43701	4.32829e-10	2.18812e-08	up	25.02	29.28	92.63	61.77	81.62	27.15	78.6733
Vitvi16g01249	0.462	-1.11278	0.00159316	0.0119181	down	30.43	28.66	18.44	17.06	9.53	29.545	15.01
Vitvi16g01278	0.47	-1.08936	1.41382e-06	3.24317e-05	down	4.98	6.19	2.94	3.16	2.41	5.585	2.83667
Vitvi16g01291	2.642	1.40165	8.4878e-05	0.00108839	up	1.38	1.79	5.64	3.58	3.94	1.585	4.38667
Vitvi16g01362	0.344	-1.54011	3.717e-08	1.25776e-06	down	248.98	181.37	97.41	51.87	86.73	215.175	78.67
Vitvi16g01389	0.414	-1.27157	6.84425e-10	3.32451e-08	down	115.39	96.79	52.9	35.45	51.85	106.09	46.7333
Vitvi16g01435	0.063	-3.99324	0.000620439	0.00557522	down	0.3	5.52	0.12	0.11	0.33	2.91	0.186667
Vitvi16g01437	0.401	-1.31892	0.00417499	0.0254065	down	16.21	41.46	8.99	18.79	8.61	28.835	12.13
Vitvi16g01453	0.176	-2.50674	0.000397904	0.00389787	down	9.73	47.71	3.01	7.72	5.21	28.72	5.31333
Vitvi16g01458	0.272	-1.88035	1.06775e-05	0.000187577	down	8.4	18.95	3.15	5.6	2.99	13.675	3.91333
Vitvi16g01459	0.216	-2.2105	7.15016e-09	2.81743e-07	down	13.42	36.12	5.29	6.35	5.17	24.77	5.60333
Vitvi16g01460	0.215	-2.22047	4.9741e-07	1.28819e-05	down	6.79	15.88	2.16	3.59	1.85	11.335	2.53333
Vitvi16g01461	0.178	-2.492	1.25982e-05	0.000216097	down	30.5	81.75	9.38	13.63	7.7	56.125	10.2367
Vitvi16g01462	0.276	-1.85952	5.96624e-06	0.000112701	down	11.61	26.42	4.44	7.74	4.17	19.015	5.45
Vitvi16g01463	0.348	-1.52118	2.25734e-05	0.000354333	down	26.29	65.25	13.73	21.23	14.93	45.77	16.63
Vitvi16g01465	0.255	-1.97364	0.000161206	0.00186634	down	2.94	7.99	1.81	1.5	1.03	5.465	1.44667
Vitvi16g01466	0.292	-1.77522	2.19781e-05	0.000346538	down	8.72	21.09	5.52	5	2.95	14.905	4.49
Vitvi16g01467	0.189	-2.40124	7.5584e-10	3.64602e-08	down	19.82	57.46	7.96	8.22	6.32	38.64	7.5
Vitvi16g01469	0.262	-1.93314	1.39573e-05	0.000235765	down	9.83	31.75	5.52	6.81	4.7	20.79	5.67667
Vitvi16g01471	0.289	-1.79074	5.98923e-07	1.52487e-05	down	12.6	30.4	5	6.77	5.42	21.5	5.73
Vitvi16g01486	0.465	-1.1044	0.00332481	0.0213105	down	11.26	26.71	9.88	10.76	6.96	18.985	9.2
Vitvi16g01502	0.332	-1.59204	0.00712502	0.0383072	down	17.68	42.89	6.66	14.34	10.29	30.285	10.43
Vitvi16g01503	0.304	-1.7169	0.000249208	0.00265376	down	3.62	9.94	1.41	2.91	2.08	6.78	2.13333
Vitvi16g01561	0.435	-1.2011	0.00100916	0.0082811	down	38.29	24.2	10.66	10.55	21.7	31.245	14.3033
Vitvi16g01696	0.423	-1.24225	0.000280273	0.00292497	down	5.38	4.08	2.08	2.09	2.1	4.73	2.09
Vitvi16g01907	2.897	1.53452	9.93678e-08	3.06253e-06	up	4.08	3.08	12.2	8.94	11.45	3.58	10.8633
Vitvi16g01920	0.361	-1.4685	3.87304e-09	1.6104e-07	down	67.12	48.02	26.55	16.57	22.57	57.57	21.8967
Vitvi16g01928	2.326	1.21762	8.84834e-05	0.00112542	up	5.47	4.01	11.79	9.03	13.97	4.74	11.5967
Vitvi16g01938	0.492	-1.02345	4.04913e-15	5.23679e-13	down	33.22	34.65	17.39	16.8	18.32	33.935	17.5033
Vitvi16g02010	0.418	-1.25922	0.000607062	0.0054972	down	4.56	4.8	1.31	2.64	1.79	4.68	1.91333
Vitvi16g02067	0.464	-1.10673	0.00944726	0.0476097	down	8.07	16.77	5.16	4.51	8.49	12.42	6.05333
Vitvi16g02084	2.426	1.27861	0.00268526	0.018028	up	2.58	1.83	6.05	4.93	6	2.205	5.66
Vitvi17g00040	2.405	1.26588	5.33499e-05	0.000740402	up	2.39	2.04	5.7	4.5	6.07	2.215	5.42333
Vitvi17g00047	2.4	1.26305	3.89702e-07	1.03467e-05	up	3.35	3.58	9.91	7.53	7.78	3.465	8.40667
Vitvi17g00070	0.136	-2.88315	3.01318e-07	8.28172e-06	down	6.03	4.3	1.05	0.31	0.86	5.165	0.74
Vitvi17g00093	2.653	1.40775	0.00181782	0.0132554	up	1.59	2.56	7.41	4.39	5.64	2.075	5.81333
Vitvi17g00098	2.651	1.40673	0.00104216	0.00848584	up	2.89	1.53	7.15	6.46	5.08	2.21	6.23
Vitvi17g00102	0.464	-1.10786	2.56436e-23	9.16257e-21	down	177.81	190.66	95.99	86.87	88.55	184.235	90.47
Vitvi17g00103	2.294	1.19791	5.88546e-07	1.50295e-05	up	10.14	6.66	22.14	18.46	20.26	8.4	20.2867
Vitvi17g00116	0.363	-1.46281	6.8526e-14	7.15147e-12	down	210.2	157.82	66.45	61.99	81.83	184.01	70.09
Vitvi17g00162	0.362	-1.46509	1.94491e-06	4.29175e-05	down	12.45	9.38	5.75	3.04	3.67	10.915	4.15333
Vitvi17g00217	2.082	1.05763	2.29595e-06	4.9693e-05	up	199.67	255.19	653.4	393.18	453.01	227.43	499.863
Vitvi17g00283	0.401	-1.31719	1.40472e-08	5.25052e-07	down	797.24	688.84	421.25	240.47	294.61	743.04	318.777
Vitvi17g00284	2.974	1.57238	7.02526e-20	1.64555e-17	up	2.17	2.15	8.58	7.99	8.76	2.16	8.44333
Vitvi17g00296	0.294	-1.76697	2.9119e-05	0.000438879	down	2.02	2	0.63	0.52	0.71	2.01	0.62
Vitvi17g00301	0.43	-1.21832	1.10135e-09	5.15945e-08	down	11.13	41.67	4.26	28.56	18.16	26.4	16.9933
Vitvi17g00316	2.098	1.06875	8.52506e-07	2.08973e-05	up	8.91	13.38	25.26	27.6	21.63	11.145	24.83
Vitvi17g00390	6.102	2.60923	1.4961e-29	1.21305e-26	up	0.95	1.45	7.85	7.26	7.1	1.2	7.40333
Vitvi17g00484	2.059	1.04203	4.92453e-05	0.000692093	up	11.58	16.19	30.06	22.31	37.33	13.885	29.9
Vitvi17g00533	2.015	1.01103	4.76712e-14	5.12733e-12	up	12.36	12.34	28.91	23.93	25.87	12.35	26.2367
Vitvi17g00554	2.048	1.03395	2.19353e-07	6.25735e-06	up	21.72	32.12	54.6	66.08	53.62	26.92	58.1
Vitvi17g00556	0.499	-1.00402	0.0039055	0.0241301	down	4.19	7.82	2.79	3.97	2.64	6.005	3.13333
Vitvi17g00558	2.195	1.13405	2.06796e-08	7.51631e-07	up	16.26	21	48.48	36.09	44.47	18.63	43.0133
Vitvi17g00601	26.692	4.73835	0.00238108	0.016393	up	0.58	0.23	26.49	7.51	0.91	0.405	11.6367
Vitvi17g00615	2.555	1.35343	4.28023e-14	4.65111e-12	up	96.48	80.45	279.66	204.39	233.6	88.465	239.217
Vitvi17g00695	2.09	1.06344	4.02815e-07	1.0668e-05	up	46.04	54.32	94.77	94.53	139.19	50.18	109.497
Vitvi17g00720	2.407	1.2675	2.36682e-07	6.65267e-06	up	4.1	4.87	13.25	8.72	11.94	4.485	11.3033
Vitvi17g00727	0.497	-1.00814	2.76968e-07	7.68258e-06	down	47.43	34.84	23.28	19.31	22.26	41.135	21.6167
Vitvi17g00732	2.394	1.25921	0.00201376	0.0143857	up	6.18	8.58	12.88	30.08	12.64	7.38	18.5333
Vitvi17g00736	3.318	1.73023	1.89739e-09	8.49232e-08	up	2.45	3	11.08	7.09	9.55	2.725	9.24
Vitvi17g00829	0.485	-1.04371	1.55817e-06	3.54345e-05	down	32.78	25.65	18.14	11.81	14.52	29.215	14.8233
Vitvi17g00881	2.42	1.27517	6.34886e-11	3.80228e-09	up	11.48	10.76	31.25	23.91	29.61	11.12	28.2567
Vitvi17g00920	3.255	1.7028	2.81431e-09	1.20832e-07	up	1.77	1.92	7.11	5.44	7.05	1.845	6.53333
Vitvi17g00979	2.323	1.21629	1.36682e-07	4.11041e-06	up	1.73	2.23	4.27	4.66	5.5	1.98	4.81
Vitvi17g01250	2.086	1.06042	0.00136521	0.0105037	up	2.04	2.16	4.88	3.8	3	2.1	3.89333
Vitvi17g01251	2.431	1.28183	4.48587e-06	8.81524e-05	up	14.66	18.62	54.56	28.55	43.35	16.64	42.1533
Vitvi17g01318	0.48	-1.05849	8.27102e-06	0.000150441	down	30.35	30.05	14.1	13.68	18.48	30.2	15.42
Vitvi17g01339	2.235	1.16015	1.86098e-06	4.12528e-05	up	5.52	8.37	18.68	15.12	15.05	6.945	16.2833
Vitvi17g01596	3.325	1.73316	6.15024e-07	1.56209e-05	up	4.79	4.42	18.77	15.94	14.6	4.605	16.4367
Vitvi18g00031	2.139	1.0972	1.20678e-05	0.000208354	up	4.38	5.13	9.79	10.48	11.69	4.755	10.6533
Vitvi18g00034	2.365	1.24209	7.37678e-09	2.8959e-07	up	5.32	4.65	12.37	10.97	13.8	4.985	12.38
Vitvi18g00040	3.851	1.9451	4.11102e-29	2.88881e-26	up	11.5	13.08	55.71	45.54	48.33	12.29	49.86
Vitvi18g00052	2.001	1.00095	0.000229182	0.00247509	up	5.26	7.51	15.43	10.43	14.69	6.385	13.5167
Vitvi18g00070	4.928	2.30101	1.01345e-15	1.41487e-13	up	6.05	9.44	52.85	30.09	37.01	7.745	39.9833
Vitvi18g00087	0.248	-2.00876	2.3637e-07	6.65267e-06	down	36.18	24.7	2.49	1.74	4.52	30.44	2.91667
Vitvi18g00109	3.699	1.88714	1.11414e-11	7.45627e-10	up	4.74	5.28	24.48	15.58	18.52	5.01	19.5267
Vitvi18g00119	0.405	-1.30488	1.97898e-13	1.94041e-11	down	30.39	24.9	11.77	10.54	12.9	27.645	11.7367
Vitvi18g00189	0.131	-2.9284	8.47747e-17	1.47697e-14	down	33.7	30.3	6.46	2.48	4.31	32	4.41667
Vitvi18g00190	0.361	-1.4699	4.73857e-15	6.09108e-13	down	22.37	22.07	9.31	8.61	7.33	22.22	8.41667
Vitvi18g00228	0.454	-1.13974	0.00111126	0.00891417	down	2.7	4.11	1.4	2.02	1.43	3.405	1.61667
Vitvi18g00239	3.599	1.84763	2.2315e-16	3.56381e-14	up	4.4	5.91	22.7	16.23	19.65	5.155	19.5267
Vitvi18g00283	2.308	1.20674	8.8834e-12	6.10003e-10	up	15.03	18.16	46.34	35.78	37.37	16.595	39.83
Vitvi18g00310	0.19	-2.39689	1.79269e-06	3.99068e-05	down	82.07	74.25	23.78	9.72	13.23	78.16	15.5767
Vitvi18g00363	0.394	-1.3423	1.18278e-05	0.000204714	down	12.59	8.19	5.7	4.01	3.42	10.39	4.37667
Vitvi18g00406	2.579	1.36695	2.01387e-05	0.000321138	up	2.26	3.12	7.7	7.85	6.36	2.69	7.30333
Vitvi18g00432	2.129	1.09036	0.000137439	0.00163416	up	12.15	17.29	44.83	27.25	26.72	14.72	32.9333
Vitvi18g00457	3.702	1.88832	6.3486e-07	1.60666e-05	up	1.25	1.1	5.46	4.66	3.52	1.175	4.54667
Vitvi18g00513	0.442	-1.17948	1.42456e-06	3.26426e-05	down	30.75	25.53	15.69	12.95	16.46	28.14	15.0333
Vitvi18g00520	3.714	1.89306	3.29253e-20	8.07092e-18	up	2.89	3.26	12.39	9.71	13.94	3.075	12.0133
Vitvi18g00542	4.035	2.01255	1.5775e-05	0.000261853	up	5.07	12.36	21.79	56.56	32.31	8.715	36.8867
Vitvi18g00544	2.812	1.49141	6.29397e-11	3.78983e-09	up	1.42	1.77	4.62	4.24	5.23	1.595	4.69667
Vitvi18g00593	0.425	-1.23565	1.23008e-05	0.000211858	down	86.79	57.27	41.52	22.5	32.42	72.03	32.1467
Vitvi18g00626	2.863	1.51763	2.1229e-12	1.72791e-10	up	2.48	2.98	7.89	7.31	9.37	2.73	8.19
Vitvi18g00683	0.36	-1.47243	9.06923e-12	6.18733e-10	down	183.8	168.66	86.06	51.78	61.66	176.23	66.5
Vitvi18g00731	2.243	1.16534	1.92695e-07	5.60027e-06	up	8.32	10.52	27.13	19.02	20.28	9.42	22.1433
Vitvi18g00757	2.397	1.26127	2.80454e-07	7.76906e-06	up	26.68	29.19	92.17	53.58	66.83	27.935	70.86
Vitvi18g00781	2.105	1.07388	2.56515e-07	7.16238e-06	up	10.93	11.12	26.77	18.76	27.34	11.025	24.29
Vitvi18g00796	3.354	1.74606	2.02788e-23	7.37066e-21	up	4.27	4.5	14.99	15	16.25	4.385	15.4133
Vitvi18g00842	0.348	-1.52234	4.14777e-07	1.09573e-05	down	93.64	79.25	46.87	23.69	24.81	86.445	31.79
Vitvi18g00843	2.462	1.29992	3.40474e-07	9.17394e-06	up	10.61	9.35	28.67	28.56	21	9.98	26.0767
Vitvi18g00905	2.062	1.04419	0.00121633	0.00959875	up	4.71	9.1	12.71	16.58	15.56	6.905	14.95
Vitvi18g00911	0.268	-1.8993	0.000434817	0.00420047	down	1.44	2.12	0.53	0.5	15.33	1.78	5.45333
Vitvi18g01077	5.104	2.35151	8.40744e-12	5.83017e-10	up	1.19	0.84	5.29	4.74	5.76	1.015	5.26333
Vitvi18g01110	4.512	2.17378	1.17356e-26	6.61431e-24	up	3.27	4.48	19.58	16.66	18.35	3.875	18.1967
Vitvi18g01152	0.24	-2.05986	2.77478e-32	2.78549e-29	down	12.81	11.88	2.98	2.97	3.35	12.345	3.1
Vitvi18g01165	2.045	1.0322	0.00312518	0.0203089	up	4.71	5.59	11.05	15.53	6.64	5.15	11.0733
Vitvi18g01203	2.384	1.25343	0.00199162	0.0142565	up	2.01	3.83	8.38	7.92	5.4	2.92	7.23333
Vitvi18g01205	2.95	1.56094	4.86436e-05	0.00068455	up	2.92	6.37	15.47	11.38	16.44	4.645	14.43
Vitvi18g01209	2.952	1.56156	0.000131143	0.00156724	up	1.47	1.86	5.59	5.69	4.22	1.665	5.16667
Vitvi18g01224	2.713	1.4399	1.88438e-05	0.000304471	up	1.74	2.44	7.5	4.4	6.53	2.09	6.14333
Vitvi18g01231	2.107	1.07526	1.0187e-07	3.13506e-06	up	34.56	47.93	107.41	76.43	89.44	41.245	91.0933
Vitvi18g01385	2.006	1.00412	3.86749e-11	2.42651e-09	up	56.59	66.56	129.01	115.06	144.69	61.575	129.587
Vitvi18g01488	3.277	1.71239	2.66941e-08	9.50571e-07	up	1.78	1.96	5.95	8.09	5.25	1.87	6.43
Vitvi18g01512	0.444	-1.16981	3.74861e-06	7.55492e-05	down	42.22	42.86	16.87	14.14	25.17	42.54	18.7267
Vitvi18g01618	5.594	2.48395	1.15588e-10	6.53272e-09	up	0.91	0.82	5.8	4.19	5.25	0.865	5.08
Vitvi18g01661	2.647	1.40442	1.47111e-08	5.48894e-07	up	1.87	2.62	5.43	6.2	7.06	2.245	6.23
Vitvi18g01711	193.992	7.59986	3.16439e-07	8.63822e-06	up	0.05	0	3.97	4.48	6.98	0.025	5.14333
Vitvi18g01839	4.015	2.00548	1.18892e-05	0.000205608	up	2.48	1.07	10.38	4.76	7.4	1.775	7.51333
Vitvi18g01873	0.338	-1.56516	0.00571046	0.0323162	down	4.06	5.49	0.96	3.15	1.39	4.775	1.83333
Vitvi18g01938	0.468	-1.09619	1.06351e-05	0.000187034	down	8.36	11.79	8.97	3.41	11.71	10.075	8.03
Vitvi18g01982	2.41	1.26931	1.8141e-08	6.67419e-07	up	4.44	4.63	13.54	9.34	12.57	4.535	11.8167
Vitvi18g02046	5.577	2.47941	2.16757e-06	4.71091e-05	up	0.43	1.06	3.11	3.94	5.95	0.745	4.33333
Vitvi18g02298	3.018	1.59353	9.34892e-06	0.000166879	up	3.17	7.29	14.43	13.71	21.42	5.23	16.52
Vitvi18g02345	0.134	-2.9012	0.00545108	0.0310915	down	209.18	94.84	38.5	4.72	21.29	152.01	21.5033
Vitvi18g02408	2.51	1.32772	1.82309e-13	1.82145e-11	up	98.74	80.9	283.28	213.73	217.59	89.82	238.2
Vitvi18g02427	2.102	1.07158	7.89613e-06	0.000144245	up	2.04	2.44	4.75	4.79	5.33	2.24	4.95667
Vitvi18g02449	2.479	1.30995	0.000350171	0.0035102	up	1.22	2.43	5.58	4.45	4.21	1.825	4.74667
Vitvi18g02461	2.563	1.35802	0.00959791	0.0481976	up	2.86	3.82	12.83	8.54	5.83	3.34	9.06667
Vitvi18g02472	0.478	-1.06625	9.46941e-10	4.5164e-08	down	65.38	56.7	27.91	26.75	32.84	61.04	29.1667
Vitvi18g02476	2.681	1.42299	4.909e-07	1.27604e-05	up	7.02	13.15	24.02	33.08	27.85	10.085	28.3167
Vitvi18g02544	0.314	-1.67106	0.0098858	0.049198	down	103.71	71.99	25.89	33.55	52.64	87.85	37.36
Vitvi18g02572	0.255	-1.97082	0.00984985	0.0490654	down	8.57	7.52	3.8	0.83	2.22	8.045	2.28333
Vitvi18g02625	0.332	-1.58976	2.10966e-10	1.14035e-08	down	74.32	53.19	26.36	16	23.59	63.755	21.9833
Vitvi18g02643	0.417	-1.26196	0.0010468	0.00851373	down	64.47	31.75	17.59	25.69	22.26	48.11	21.8467
Vitvi18g02681	2.346	1.23011	5.23656e-05	0.000727699	up	2.56	2.01	6.9	4.98	4.96	2.285	5.61333
Vitvi18g02690	0.358	-1.48184	5.00068e-08	1.64204e-06	down	13.23	11.92	5.8	4.76	3.61	12.575	4.72333
Vitvi18g02694	0.222	-2.17455	3.55792e-05	0.000518703	down	5.09	9.11	0.66	2.12	1.97	7.1	1.58333
Vitvi18g02779	0.375	-1.41379	0.00798786	0.0418366	down	2.8	2.2	0.75	1.29	0.92	2.5	0.986667
Vitvi18g02797	0.383	-1.38637	0.0082015	0.0426379	down	75.45	31.58	25.84	17.54	28.82	53.515	24.0667
Vitvi18g02799	2.139	1.09708	1.54943e-06	3.53502e-05	up	8.75	10.9	26.25	20.19	19.98	9.825	22.14
Vitvi18g02825	0.205	-2.28358	0.00711131	0.0382726	down	0.9	4.64	0.3	0.89	0.6	2.77	0.596667
Vitvi18g02927	5.431	2.4413	4.93348e-12	3.64922e-10	up	1.64	3.89	17.52	17.69	11.91	2.765	15.7067
Vitvi18g02962	2.199	1.137	0.000498539	0.00469393	up	9.62	13.64	35.65	20.12	25.82	11.63	27.1967
Vitvi18g02971	4.075	2.02674	3.48791e-13	3.25348e-11	up	1.03	1.2	3.67	4.14	6.31	1.115	4.70667
Vitvi18g02991	3.305	1.72444	4.15263e-14	4.53583e-12	up	42.96	54.33	209.86	136.58	179.8	48.645	175.413
Vitvi18g03021	10.079	3.33331	1.84359e-18	3.70139e-16	up	0.64	1.51	14.65	9.77	9.02	1.075	11.1467
Vitvi18g03040	7.812	2.96576	1.05979e-37	1.3142e-34	up	3.14	4.6	38.25	29.2	28.2	3.87	31.8833
Vitvi18g03041	6.068	2.60129	2.40954e-20	6.04708e-18	up	3.86	4.11	32.18	25.34	25.89	3.985	27.8033
Vitvi18g03058	0.282	-1.82699	0.000366643	0.00365102	down	2.41	7.63	1.69	1.49	1.62	5.02	1.6
Vitvi18g03077	3.547	1.82671	0.00134955	0.0104022	up	1.08	1.09	3.95	4.47	3.63	1.085	4.01667
Vitvi18g03096	0.333	-1.58473	7.67223e-15	9.24219e-13	down	289.05	224.47	109.41	70.95	87.46	256.76	89.2733
Vitvi19g00008	2.736	1.45203	3.76745e-11	2.3708e-09	up	12.51	15.02	47.05	40.63	33.52	13.765	40.4
Vitvi19g00021	2.679	1.42157	0.000222951	0.0024165	up	1.49	1.76	6.1	3.53	4.32	1.625	4.65
Vitvi19g00125	0.491	-1.02566	3.98645e-13	3.6698e-11	down	104.84	94.27	57.48	47.27	49.16	99.555	51.3033
Vitvi19g00147	2.982	1.57612	1.94046e-05	0.000312266	up	1.45	1.33	5.01	3.83	4.22	1.39	4.35333
Vitvi19g00164	0.307	-1.70462	7.36644e-12	5.22869e-10	down	18.28	14.2	6.1	4.33	5.27	16.24	5.23333
Vitvi19g00200	2.066	1.04718	0.000407587	0.00397794	up	6.89	5.24	16.37	11.46	11.91	6.065	13.2467
Vitvi19g00270	0.345	-1.53451	3.4868e-10	1.81047e-08	down	235.01	274.65	101.24	62.89	113.26	254.83	92.4633
Vitvi19g00405	0.185	-2.43084	6.03773e-09	2.41521e-07	down	28.49	16.99	6.47	2.89	4.21	22.74	4.52333
Vitvi19g00410	0.488	-1.03642	0.00105575	0.00857991	down	10.31	5.74	4.4	4.23	3.7	8.025	4.11
Vitvi19g00494	4.028	2.0102	4.22538e-05	0.000604309	up	1.1	1.26	5.44	5.45	4.13	1.18	5.00667
Vitvi19g00554	0.137	-2.86587	0.000164793	0.00190147	down	16.37	9.25	3.5	0.36	1.88	12.81	1.91333
Vitvi19g00564	2.211	1.14447	9.90647e-06	0.000175642	up	6.43	9.92	18.6	16.07	22.19	8.175	18.9533
Vitvi19g00565	0.376	-1.40975	0.00201652	0.0143881	down	19.97	20.84	10.54	8.22	7.12	20.405	8.62667
Vitvi19g00581	0.292	-1.77799	1.22074e-11	8.11811e-10	down	5610.53	5505.42	1309.87	2451.6	1479.08	5557.98	1746.85
Vitvi19g00609	2.905	1.53852	3.45913e-20	8.38183e-18	up	2.68	3.23	9.53	8.56	8.85	2.955	8.98
Vitvi19g00678	0.459	-1.12389	1.15426e-05	0.000200766	down	22.78	17.06	11.27	7.16	10.21	19.92	9.54667
Vitvi19g00682	2.538	1.34343	3.13817e-10	1.64158e-08	up	8.19	9.21	28.2	19.49	21.78	8.7	23.1567
Vitvi19g00750	6.684	2.74072	1.1994e-50	4.21409e-47	up	7.83	9.43	68.33	52.4	60.96	8.63	60.5633
Vitvi19g00954	0.461	-1.11693	0.00593253	0.0333148	down	8.72	10.23	7.3	2.72	3.82	9.475	4.61333
Vitvi19g01338	0.416	-1.26373	0.00295643	0.0194703	down	3.95	4.43	1.7	2.77	1.65	4.19	2.04
Vitvi19g01352	0.484	-1.04656	1.19715e-06	2.83563e-05	down	22.53	16.06	10.13	9.11	9.67	19.295	9.63667
Vitvi19g01360	2.842	1.50697	6.93953e-13	6.14673e-11	up	6.51	8.43	20.43	19.5	24.73	7.47	21.5533
Vitvi19g01464	2.935	1.55356	7.80486e-12	5.46626e-10	up	2.14	2.98	7.25	7.18	9.12	2.56	7.85
Vitvi19g01550	0.479	-1.0617	5.07768e-13	4.555e-11	down	98.86	85.88	50.45	43.04	46.38	92.37	46.6233
Vitvi19g01661	3.462	1.79152	4.40957e-05	0.000627672	up	2.66	2.19	10.21	8.78	7.89	2.425	8.96
Vitvi19g01719	4.342	2.11837	2.22164e-15	2.9642e-13	up	1.27	1.45	6.58	5.16	6.91	1.36	6.21667
Vitvi19g01749	4.831	2.27221	8.67078e-13	7.52217e-11	up	1.66	2.2	10.85	11.2	7.3	1.93	9.78333
Vitvi19g01760	7.576	2.92143	6.7758e-05	0.000898934	up	0.4	0.88	3.63	3.14	8.57	0.64	5.11333
Vitvi19g01864	0.368	-1.44254	8.35975e-09	3.23956e-07	down	13.12	11.49	4.94	3.78	5.57	12.305	4.76333
Vitvi19g01875	2.218	1.14938	0.000613089	0.00553064	up	5.58	9.95	18.36	21.32	14.9	7.765	18.1933
Vitvi19g01926	2.701	1.43326	0.000271038	0.00284975	up	7.2	9.3	24.51	18.26	29.6	8.25	24.1233
Vitvi19g02006	120.842	6.91698	1.40087e-05	0.000236066	up	0	0.02	4.72	6.09	3.86	0.01	4.89
Vitvi19g02007	0.4	-1.32093	0.00269093	0.0180546	down	4.1	3.22	1.26	1.23	2.09	3.66	1.52667
Vitvi19g02012	0.472	-1.08301	0.000433477	0.00418988	down	22.53	41.35	15.29	15.25	17.34	31.94	15.96
Vitvi19g02039	0.475	-1.07544	2.73599e-08	9.66119e-07	down	164.71	199.8	84.98	112.08	78.23	182.255	91.7633
Vitvi19g02064	5.109	2.35316	4.6275e-28	2.78721e-25	up	17.96	20.45	131.21	88.08	91.06	19.205	103.45

## Sheet: Tbale S4
Table S4. Significantly enriched GO terms in the comparison of BN vs. PN
GO ID	Description	Number of genes in cluster	Number of genes in background	FDR
Biological process
GO:0000302	response to reactive oxygen species	28	92	0.000281981
GO:0061077	chaperone-mediated protein folding	12	58	0.000281981
GO:0009644	response to high light intensity	11	30	0.000281981
GO:0006575	cellular modified amino acid metabolic process	23	179	0.000281981
GO:0009408	response to heat	46	180	0.000281981
GO:0042542	response to hydrogen peroxide	26	60	0.000281981
GO:0034605	cellular response to heat	17	60	0.000281981
GO:0006458	'de novo' protein folding	13	50	0.000281981
GO:0006749	glutathione metabolic process	21	123	0.000281981
GO:0051259	protein complex oligomerization	25	72	0.000281981
GO:0051084	'de novo' posttranslational protein folding	10	41	0.000281981
GO:0051085	chaperone cofactor-dependent protein refolding	10	41	0.000281981
GO:0006457	protein folding	54	284	0.000289018
GO:0009651	response to salt stress	33	236	0.000331589
GO:0006979	response to oxidative stress	34	308	0.000355692
GO:0010035	response to inorganic substance	37	326	0.000355692
GO:1901700	response to oxygen-containing compound	41	496	0.000355692
GO:0009642	response to light intensity	11	54	0.000355692
GO:0006970	response to osmotic stress	35	258	0.000372305
GO:0009266	response to temperature stimulus	50	276	0.000372803
GO:0042026	protein refolding	12	55	0.000377837
GO:0009628	response to abiotic stimulus	67	776	0.00068672
GO:0006950	response to stress	112	1879	0.000698417
GO:0042221	response to chemical	57	876	0.000826532
GO:0006518	peptide metabolic process	44	644	0.000857485
GO:0050896	response to stimulus	130	2535	0.00090077
GO:0006790	sulfur compound metabolic process	34	462	0.00163497
GO:0006986	response to unfolded protein	7	26	0.0017713
GO:0034620	cellular response to unfolded protein	7	26	0.0017713
GO:0035967	cellular response to topologically incorrect protein	7	29	0.00340316
GO:0043603	cellular amide metabolic process	47	777	0.00520847
GO:0043933	protein-containing complex subunit organization	38	588	0.00528797
GO:0061408	positive regulation of transcription from RNA polymerase II promoter in response to heat stress	5	14	0.00583566
GO:0036003	positive regulation of transcription from RNA polymerase II promoter in response to stress	5	14	0.00583566
GO:0035966	response to topologically incorrect protein	7	32	0.0061945
GO:0065003	protein-containing complex assembly	34	508	0.00650616
GO:0043618	regulation of transcription from RNA polymerase II promoter in response to stress	5	18	0.0199521
GO:0043620	regulation of DNA-templated transcription in response to stress	5	18	0.0199521
GO:0044703	multi-organism reproductive process	4	11	0.0274814
GO:0019953	sexual reproduction	4	11	0.0274814
GO:0050821	protein stabilization	5	23	0.0578832
GO:0000003	reproduction	4	14	0.066166
GO:0009690	cytokinin metabolic process	6	39	0.106093
GO:0031647	regulation of protein stability	5	28	0.131643
GO:0006817	phosphate ion transport	5	31	0.18614
GO:0072528	pyrimidine-containing compound biosynthetic process	7	60	0.194113
GO:0034754	cellular hormone metabolic process	6	46	0.210378
GO:0009416	response to light stimulus	17	252	0.222407
GO:0072655	establishment of protein localization to mitochondrion	5	34	0.260354
GO:0070585	protein localization to mitochondrion	5	34	0.260354
GO:0015976	carbon utilization	3	11	0.260653
GO:0022607	cellular component assembly	37	710	0.272563
GO:0042445	hormone metabolic process	9	102	0.308513
GO:0009765	photosynthesis, light harvesting	4	23	0.308513
GO:0035435	phosphate ion transmembrane transport	3	12	0.308513
GO:0046391	5-phosphoribose 1-diphosphate metabolic process	2	4	0.308513
GO:0006015	5-phosphoribose 1-diphosphate biosynthetic process	2	4	0.308513
GO:0033554	cellular response to stress	41	830	0.338017
GO:0009314	response to radiation	17	264	0.352382
GO:0007062	sister chromatid cohesion	7	70	0.352382
GO:0071840	cellular component organization or biogenesis	98	2345	0.357719
GO:0006541	glutamine metabolic process	5	39	0.379757
GO:0009070	serine family amino acid biosynthetic process	6	55	0.391065
GO:0046686	response to cadmium ion	6	56	0.421338
GO:0072527	pyrimidine-containing compound metabolic process	7	74	0.442552
GO:0051704	multi-organism process	4	27	0.46707
GO:0006563	L-serine metabolic process	5	42	0.481415
GO:0098661	inorganic anion transmembrane transport	3	15	0.494539
GO:0046292	formaldehyde metabolic process	3	15	0.494539
GO:0046294	formaldehyde catabolic process	3	15	0.494539
GO:0110095	cellular detoxification of aldehyde	3	15	0.494539
GO:0006221	pyrimidine nucleotide biosynthetic process	5	44	0.549437
GO:0006839	mitochondrial transport	6	61	0.549437
GO:0030150	protein import into mitochondrial matrix	3	16	0.549437
GO:0010731	protein glutathionylation	2	6	0.549437
GO:0010344	seed oilbody biogenesis	2	6	0.549437
GO:0046341	CDP-diacylglycerol metabolic process	2	6	0.549437
GO:0016024	CDP-diacylglycerol biosynthetic process	2	6	0.549437
GO:0055081	anion homeostasis	2	6	0.549437
GO:0071806	protein transmembrane transport	6	63	0.585103
GO:0065002	intracellular protein transmembrane transport	6	63	0.585103
GO:0046185	aldehyde catabolic process	3	17	0.604627
GO:0016043	cellular component organization	91	2228	0.655503
GO:0006535	cysteine biosynthetic process from serine	3	18	0.670457
GO:0009768	photosynthesis, light harvesting in photosystem I	3	18	0.670457
GO:0010037	response to carbon dioxide	3	18	0.670457
GO:0009069	serine family amino acid metabolic process	6	66	0.677254
GO:1902584	positive regulation of response to water deprivation	2	7	0.679633
GO:0050826	response to freezing	2	7	0.679633
GO:0044743	protein transmembrane import into intracellular organelle	4	33	0.712838
GO:0006465	signal peptide processing	3	20	0.798114
GO:0042793	plastid transcription	2	8	0.798114
GO:0008283	cell population proliferation	2	8	0.798114
GO:0006220	pyrimidine nucleotide metabolic process	5	53	0.798114
GO:0015698	inorganic anion transport	5	53	0.798114
GO:0006081	cellular aldehyde metabolic process	5	54	0.798114
GO:0007064	mitotic sister chromatid cohesion	4	37	0.798114
GO:0009556	microsporogenesis	2	9	0.798114
GO:0006564	L-serine biosynthetic process	2	9	0.798114
GO:0044779	meiotic spindle checkpoint	1	1	0.798114
GO:1901994	negative regulation of meiotic cell cycle phase transition	1	1	0.798114
GO:1901993	regulation of meiotic cell cycle phase transition	1	1	0.798114
GO:0019755	one-carbon compound transport	1	1	0.798114
GO:0002221	pattern recognition receptor signaling pathway	1	1	0.798114
GO:0080170	hydrogen peroxide transmembrane transport	1	1	0.798114
GO:0006314	intron homing	1	1	0.798114
GO:0006315	homing of group II introns	1	1	0.798114
GO:1902288	regulation of defense response to oomycetes	1	1	0.798114
GO:1902289	negative regulation of defense response to oomycetes	1	1	0.798114
GO:0033316	meiotic spindle assembly checkpoint	1	1	0.798114
GO:0046688	response to copper ion	1	1	0.798114
GO:0034337	RNA folding	1	1	0.798114
GO:0090615	mitochondrial mRNA processing	1	1	0.798114
GO:1903795	regulation of inorganic anion transmembrane transport	1	1	0.798114
GO:0015840	urea transport	1	1	0.798114
GO:0071918	urea transmembrane transport	1	1	0.798114
GO:1905133	negative regulation of meiotic chromosome separation	1	1	0.798114
GO:1905132	regulation of meiotic chromosome separation	1	1	0.798114
GO:1902102	regulation of metaphase/anaphase transition of meiotic cell cycle	1	1	0.798114
GO:2000185	regulation of phosphate transmembrane transport	1	1	0.798114
GO:1902103	negative regulation of metaphase/anaphase transition of meiotic cell cycle	1	1	0.798114
GO:0010966	regulation of phosphate transport	1	1	0.798114
GO:0019344	cysteine biosynthetic process	3	22	0.798114
GO:1901072	glucosamine-containing compound catabolic process	4	38	0.798114
GO:0006030	chitin metabolic process	4	38	0.798114
GO:1990542	mitochondrial transmembrane transport	4	38	0.798114
GO:0046348	amino sugar catabolic process	4	38	0.798114
GO:0006032	chitin catabolic process	4	38	0.798114
GO:0006026	aminoglycan catabolic process	4	38	0.798114
GO:0051716	cellular response to stimulus	43	970	0.798114
GO:0010817	regulation of hormone levels	10	155	0.827321
GO:0006767	water-soluble vitamin metabolic process	6	76	0.841326
GO:1901071	glucosamine-containing compound metabolic process	4	39	0.842256
GO:0006022	aminoglycan metabolic process	4	39	0.842256
GO:0043649	dicarboxylic acid catabolic process	2	10	0.898013
GO:0010497	plasmodesmata-mediated intercellular transport	2	10	0.898013
GO:0009308	amine metabolic process	7	99	0.917911
GO:0046274	lignin catabolic process	7	101	0.988177
GO:0046271	phenylpropanoid catabolic process	7	101	0.988177
GO:0019748	secondary metabolic process	16	299	1
GO:1901136	carbohydrate derivative catabolic process	6	81	1
GO:0071310	cellular response to organic substance	7	102	1
GO:0010112	regulation of systemic acquired resistance	2	11	1
GO:0048236	plant-type sporogenesis	2	11	1
GO:0043934	sporulation	2	11	1
GO:0034293	sexual sporulation	2	11	1
GO:0010496	intercellular transport	2	11	1
GO:0006534	cysteine metabolic process	3	26	1
Cellular component
GO:0031225	anchored component of membrane	14	117	0.00303144
GO:0000786	nucleosome	11	75	0.00328958
GO:0044815	DNA packaging complex	12	89	0.00335225
GO:0032993	protein-DNA complex	12	97	0.00680012
GO:0046658	anchored component of plasma membrane	12	106	0.0157288
GO:0031974	membrane-enclosed lumen	9	68	0.0280924
GO:0070013	intracellular organelle lumen	9	68	0.0280924
GO:0043233	organelle lumen	9	68	0.0280924
GO:0005737	cytoplasm	83	1763	0.0410674
GO:0031305	integral component of mitochondrial inner membrane	5	24	0.0683538
GO:0031304	intrinsic component of mitochondrial inner membrane	5	24	0.0683538
GO:0009986	cell surface	4	15	0.0842693
GO:0048471	perinuclear region of cytoplasm	4	15	0.0842693
GO:0031226	intrinsic component of plasma membrane	17	238	0.156999
GO:0031978	plastid thylakoid lumen	3	11	0.260653
GO:0009543	chloroplast thylakoid lumen	3	11	0.260653
GO:0002189	ribose phosphate diphosphokinase complex	2	4	0.308513
GO:0098573	intrinsic component of mitochondrial membrane	5	37	0.321038
GO:0032592	integral component of mitochondrial membrane	5	37	0.321038
GO:0005576	extracellular region	37	737	0.3796
GO:0016607	nuclear speck	4	29	0.549437
GO:0000326	protein storage vacuole	2	6	0.549437
GO:0000322	storage vacuole	2	6	0.549437
GO:0005759	mitochondrial matrix	5	45	0.549437
GO:0009522	photosystem I	5	50	0.74026
GO:0005829	cytosol	50	1133	0.798114
GO:0000325	plant-type vacuole	5	52	0.798114
GO:0005787	signal peptidase complex	2	8	0.798114
GO:0005744	TIM23 mitochondrial import inner membrane translocase complex	2	8	0.798114
GO:0010287	plastoglobule	4	36	0.798114
GO:0005811	lipid droplet	6	74	0.798114
GO:0005788	endoplasmic reticulum lumen	2	9	0.798114
GO:0061673	mitotic spindle astral microtubule	1	1	0.798114
GO:0032797	SMN complex	1	1	0.798114
GO:0070876	SOSS complex	1	1	0.798114
GO:0000235	astral microtubule	1	1	0.798114
GO:1990023	mitotic spindle midzone	1	1	0.798114
GO:0031977	thylakoid lumen	3	22	0.798114
GO:0012511	monolayer-surrounded lipid storage body	2	10	0.898013
GO:0016604	nuclear body	4	41	0.952989
Molecular function
GO:0043621	protein self-association	26	69	0.000281981
GO:0031072	heat shock protein binding	11	49	0.000281981
GO:0051082	unfolded protein binding	51	217	0.000289018
GO:0004364	glutathione transferase activity	21	118	0.000381188
GO:0043531	ADP binding	71	1214	0.00068672
GO:0060590	ATPase regulator activity	6	14	0.00068672
GO:0016765	transferase activity, transferring alkyl or aryl (other than methyl) groups	23	245	0.000917968
GO:0051087	chaperone binding	9	43	0.00107249
GO:0005199	structural constituent of cell wall	7	25	0.00140247
GO:0044183	protein folding chaperone	7	28	0.00291602
GO:0051787	misfolded protein binding	7	29	0.00340316
GO:0016491	oxidoreductase activity	129	2900	0.013769
GO:0000978	RNA polymerase II cis-regulatory region sequence-specific DNA binding	5	18	0.0199521
GO:0000774	adenyl-nucleotide exchange factor activity	3	5	0.0280924
GO:0015116	sulfate transmembrane transporter activity	6	31	0.0346636
GO:0016682	oxidoreductase activity, acting on diphenols and related substances as donors, oxygen as acceptor	12	127	0.066166
GO:0001671	ATPase activator activity	3	8	0.121721
GO:1901682	sulfur compound transmembrane transporter activity	6	41	0.133582
GO:0016679	oxidoreductase activity, acting on diphenols and related substances as donors	12	140	0.133582
GO:0051879	Hsp90 protein binding	3	9	0.160062
GO:0004097	catechol oxidase activity	3	9	0.160062
GO:0046982	protein heterodimerization activity	10	111	0.194113
GO:0015103	inorganic anion transmembrane transporter activity	10	111	0.194113
GO:0008271	secondary active sulfate transmembrane transporter activity	4	20	0.210427
GO:0031491	nucleosome binding	5	34	0.260354
GO:0080044	quercetin 7-O-glucosyltransferase activity	11	136	0.260653
GO:0080043	quercetin 3-O-glucosyltransferase activity	11	136	0.260653
GO:0042887	amide transmembrane transporter activity	9	101	0.295041
GO:0005515	protein binding	101	2415	0.308513
GO:0016778	diphosphotransferase activity	3	12	0.308513
GO:0004648	O-phospho-L-serine:2-oxoglutarate aminotransferase activity	2	4	0.308513
GO:0004749	ribose phosphate diphosphokinase activity	2	4	0.308513
GO:0047213	anthocyanidin 3-O-glucosyltransferase activity	2	4	0.308513
GO:0046527	glucosyltransferase activity	24	420	0.357622
GO:0010181	FMN binding	6	56	0.421338
GO:0004024	alcohol dehydrogenase activity, zinc-dependent	3	14	0.431371
GO:0042973	glucan endo-1,3-beta-D-glucosidase activity	3	14	0.431371
GO:0009001	serine O-acetyltransferase activity	2	5	0.442552
GO:0016412	serine O-acyltransferase activity	2	5	0.442552
GO:0047938	glucose-6-phosphate 1-epimerase activity	2	5	0.442552
GO:1904680	peptide transmembrane transporter activity	8	94	0.481415
GO:0004497	monooxygenase activity	30	577	0.503066
GO:0016799	hydrolase activity, hydrolyzing N-glycosyl compounds	5	44	0.549437
GO:0004022	alcohol dehydrogenase (NAD+) activity	3	16	0.549437
GO:0004089	carbonate dehydratase activity	3	16	0.549437
GO:0018455	alcohol dehydrogenase [NAD(P)+] activity	3	16	0.549437
GO:0051903	S-(hydroxymethyl)glutathione dehydrogenase activity	3	16	0.549437
GO:0019139	cytokinin dehydrogenase activity	3	16	0.549437
GO:0102721	ubiquinol:oxygen oxidoreductase activity	2	6	0.549437
GO:0008515	sucrose transmembrane transporter activity	2	6	0.549437
GO:0009916	alternative oxidase activity	2	6	0.549437
GO:0004568	chitinase activity	5	48	0.670457
GO:0022884	macromolecule transmembrane transporter activity	4	32	0.670457
GO:0140318	protein transporter activity	4	32	0.670457
GO:0008320	protein transmembrane transporter activity	4	32	0.670457
GO:0051377	mannose-ethanolamine phosphotransferase activity	2	7	0.679633
GO:0004612	phosphoenolpyruvate carboxykinase (ATP) activity	2	7	0.679633
GO:0016645	oxidoreductase activity, acting on the CH-NH group of donors	5	50	0.74026
GO:0000987	cis-regulatory region sequence-specific DNA binding	5	52	0.798114
GO:0008725	DNA-3-methyladenine glycosylase activity	2	8	0.798114
GO:0008083	growth factor activity	2	8	0.798114
GO:0015157	oligosaccharide transmembrane transporter activity	2	8	0.798114
GO:0015154	disaccharide transmembrane transporter activity	2	8	0.798114
GO:0003905	alkylbase DNA N-glycosylase activity	2	8	0.798114
GO:0043733	DNA-3-methylbase glycosylase activity	2	8	0.798114
GO:0008194	UDP-glycosyltransferase activity	29	598	0.798114
GO:0005372	water transmembrane transporter activity	3	21	0.798114
GO:0031492	nucleosomal DNA binding	3	21	0.798114
GO:0035250	UDP-galactosyltransferase activity	3	21	0.798114
GO:0015250	water channel activity	3	21	0.798114
GO:0035251	UDP-glucosyltransferase activity	19	355	0.798114
GO:0016688	L-ascorbate peroxidase activity	2	9	0.798114
GO:0008732	L-allo-threonine aldolase activity	1	1	0.798114
GO:0004851	uroporphyrin-III C-methyltransferase activity	1	1	0.798114
GO:0072586	DNA topoisomerase type II (double strand cut, ATP-hydrolyzing) regulator activity	1	1	0.798114
GO:0072587	DNA topoisomerase type II (double strand cut, ATP-hydrolyzing) activator activity	1	1	0.798114
GO:0052907	23S rRNA (adenine(1618)-N(6))-methyltransferase activity	1	1	0.798114
GO:0044548	S100 protein binding	1	1	0.798114
GO:0044547	DNA topoisomerase binding	1	1	0.798114
GO:0062045	L-lysine alpha-aminotransferase	1	1	0.798114
GO:0018580	nitronate monooxygenase activity	1	1	0.798114
GO:0047130	saccharopine dehydrogenase (NADP+, L-lysine-forming) activity	1	1	0.798114
GO:0046608	carotenoid isomerase activity	1	1	0.798114
GO:0008115	sarcosine oxidase activity	1	1	0.798114
GO:0004753	saccharopine dehydrogenase activity	1	1	0.798114
GO:0004755	saccharopine dehydrogenase (NADP+, L-glutamate-forming) activity	1	1	0.798114
GO:0047485	protein N-terminus binding	1	1	0.798114
GO:0004635	phosphoribosyl-AMP cyclohydrolase activity	1	1	0.798114
GO:0004636	phosphoribosyl-ATP diphosphatase activity	1	1	0.798114
GO:0004073	aspartate-semialdehyde dehydrogenase activity	1	1	0.798114
GO:0035539	8-oxo-7,8-dihydrodeoxyguanosine triphosphate pyrophosphatase activity	1	1	0.798114
GO:0004694	eukaryotic translation initiation factor 2alpha kinase activity	1	1	0.798114
GO:0008988	rRNA (adenine-N6-)-methyltransferase activity	1	1	0.798114
GO:0004793	threonine aldolase activity	1	1	0.798114
GO:0008484	sulfuric ester hydrolase activity	1	1	0.798114
GO:0043115	precorrin-2 dehydrogenase activity	1	1	0.798114
GO:0008716	D-alanine-D-alanine ligase activity	1	1	0.798114
GO:0019207	kinase regulator activity	6	75	0.804879
GO:0033218	amide binding	8	116	0.804879
GO:0008097	5S rRNA binding	3	23	0.853469
GO:0015301	anion:anion antiporter activity	4	40	0.894367
GO:0140323	solute:anion antiporter activity	4	40	0.894367
GO:0052716	hydroquinone:oxygen oxidoreductase activity	7	101	0.988177
GO:0016616	oxidoreductase activity, acting on the CH-OH group of donors, NAD or NADP as acceptor	16	297	0.995296
GO:0043168	anion binding	235	6557	1

## Sheet: Table S5
Figure S5. Significantly enriched GO terms in the comparison of BN vs. AN
GO ID	Description	Number of genes in cluster	Number of genes in background	FDR
Biological process
GO:0019953	sexual reproduction	6	11	0.000170476
GO:0044703	multi-organism reproductive process	6	11	0.000170476
GO:0044772	mitotic cell cycle phase transition	10	45	0.000170476
GO:0044770	cell cycle phase transition	10	46	0.000170476
GO:0051259	protein complex oligomerization	15	72	0.000170476
GO:0051338	regulation of transferase activity	19	132	0.000170476
GO:0007018	microtubule-based movement	21	132	0.000170476
GO:0042542	response to hydrogen peroxide	14	60	0.000170476
GO:0065009	regulation of molecular function	27	280	0.000170476
GO:0051726	regulation of cell cycle	21	185	0.000170476
GO:0071900	regulation of protein serine/threonine kinase activity	11	61	0.000170476
GO:0001932	regulation of protein phosphorylation	16	119	0.000170476
GO:0000079	regulation of cyclin-dependent protein serine/threonine kinase activity	10	50	0.000170476
GO:1904029	regulation of cyclin-dependent protein kinase activity	10	50	0.000170476
GO:0006928	movement of cell or subcellular component	22	153	0.000170476
GO:0050790	regulation of catalytic activity	27	265	0.000170476
GO:1903047	mitotic cell cycle process	24	287	0.000170476
GO:0006979	response to oxidative stress	28	308	0.000170476
GO:0009644	response to high light intensity	9	30	0.000170476
GO:0000003	reproduction	6	14	0.000170476
GO:0031399	regulation of protein modification process	22	211	0.000170476
GO:0000302	response to reactive oxygen species	14	92	0.000170476
GO:0045859	regulation of protein kinase activity	16	108	0.000170476
GO:0042325	regulation of phosphorylation	17	124	0.000170476
GO:0043549	regulation of kinase activity	16	109	0.000170476
GO:0007017	microtubule-based process	31	295	0.000170476
GO:0022402	cell cycle process	33	449	0.000170476
GO:0019220	regulation of phosphate metabolic process	19	178	0.000170476
GO:0051174	regulation of phosphorus metabolic process	19	178	0.000170476
GO:0009408	response to heat	20	180	0.000181991
GO:0006457	protein folding	23	284	0.000220494
GO:0071554	cell wall organization or biogenesis	32	485	0.000220494
GO:0006950	response to stress	91	1879	0.000303994
GO:0009266	response to temperature stimulus	22	276	0.000375284
GO:0051704	multi-organism process	7	27	0.000386695
GO:0050896	response to stimulus	107	2535	0.000386695
GO:0009642	response to light intensity	9	54	0.00068727
GO:0006952	defense response	30	470	0.000767384
GO:0009651	response to salt stress	19	236	0.000985737
GO:0006970	response to osmotic stress	20	258	0.00101032
GO:0010035	response to inorganic substance	23	326	0.00110618
GO:0009698	phenylpropanoid metabolic process	16	180	0.00130874
GO:0032268	regulation of cellular protein metabolic process	22	314	0.00178737
GO:0019748	secondary metabolic process	21	299	0.00253813
GO:0071840	cellular component organization or biogenesis	93	2345	0.00284548
GO:0051246	regulation of protein metabolic process	22	330	0.00354449
GO:0071555	cell wall organization	26	420	0.00355841
GO:0007135	meiosis II	3	4	0.00369539
GO:0061983	meiosis II cell cycle process	3	4	0.00369539
GO:0007142	male meiosis II	3	4	0.00369539
GO:0071669	plant-type cell wall organization or biogenesis	16	203	0.00482111
GO:0016043	cellular component organization	88	2228	0.00543736
GO:0045229	external encapsulating structure organization	26	440	0.00592581
GO:0009664	plant-type cell wall organization	7	45	0.00762665
GO:0045490	pectin catabolic process	11	113	0.00906469
GO:0009628	response to abiotic stimulus	38	776	0.0106774
GO:0019439	aromatic compound catabolic process	19	290	0.0116745
GO:0046274	lignin catabolic process	10	101	0.0145401
GO:0046271	phenylpropanoid catabolic process	10	101	0.0145401
GO:1901361	organic cyclic compound catabolic process	19	300	0.0173179
GO:1901072	glucosamine-containing compound catabolic process	6	38	0.0186417
GO:0006030	chitin metabolic process	6	38	0.0186417
GO:0006032	chitin catabolic process	6	38	0.0186417
GO:0046348	amino sugar catabolic process	6	38	0.0186417
GO:0006026	aminoglycan catabolic process	6	38	0.0186417
GO:0045488	pectin metabolic process	12	146	0.0203581
GO:0010393	galacturonan metabolic process	12	146	0.0203581
GO:1901071	glucosamine-containing compound metabolic process	6	39	0.0209644
GO:0006022	aminoglycan metabolic process	6	39	0.0209644
GO:0006271	DNA strand elongation involved in DNA replication	3	7	0.0243249
GO:0022616	DNA strand elongation	3	7	0.0243249
GO:0006559	L-phenylalanine catabolic process	5	28	0.0295863
GO:1902222	erythrose 4-phosphate/phosphoenolpyruvate family amino acid catabolic process	5	28	0.0295863
GO:0031401	positive regulation of protein modification process	9	93	0.0300798
GO:0007346	regulation of mitotic cell cycle	8	77	0.0362341
GO:0006597	spermine biosynthetic process	3	8	0.0362384
GO:0000272	polysaccharide catabolic process	15	227	0.0391875
GO:0070507	regulation of microtubule cytoskeleton organization	4	18	0.0416548
GO:0051347	positive regulation of transferase activity	8	79	0.0416548
GO:0005975	carbohydrate metabolic process	57	1411	0.0436737
GO:0042440	pigment metabolic process	9	99	0.0445504
GO:0031325	positive regulation of cellular metabolic process	27	529	0.0487892
GO:0090224	regulation of spindle organization	3	9	0.05026
GO:0060236	regulation of mitotic spindle organization	3	9	0.05026
GO:0033043	regulation of organelle organization	12	165	0.0512365
GO:0009056	catabolic process	64	1635	0.0512365
GO:0009893	positive regulation of metabolic process	27	539	0.0534786
GO:0009800	cinnamic acid biosynthetic process	4	20	0.0579065
GO:0009803	cinnamic acid metabolic process	4	20	0.0579065
GO:0010604	positive regulation of macromolecule metabolic process	26	511	0.0617838
GO:0051173	positive regulation of nitrogen compound metabolic process	26	512	0.0617838
GO:0048518	positive regulation of biological process	33	713	0.0617838
GO:0006558	L-phenylalanine metabolic process	5	34	0.0617838
GO:1902221	erythrose 4-phosphate/phosphoenolpyruvate family amino acid metabolic process	5	34	0.0617838
GO:0009074	aromatic amino acid family catabolic process	5	34	0.0617838
GO:0043086	negative regulation of catalytic activity	5	34	0.0617838
GO:0045937	positive regulation of phosphate metabolic process	7	67	0.0617838
GO:0010562	positive regulation of phosphorus metabolic process	7	67	0.0617838
GO:0008215	spermine metabolic process	3	10	0.0634624
GO:0006040	amino sugar metabolic process	6	52	0.0759626
GO:0032886	regulation of microtubule-based process	4	22	0.076899
GO:0043085	positive regulation of catalytic activity	10	132	0.0810996
GO:0010564	regulation of cell cycle process	8	91	0.0849096
GO:0007010	cytoskeleton organization	12	179	0.086905
GO:0009765	photosynthesis, light harvesting	4	23	0.0872657
GO:0022412	cellular process involved in reproduction in multicellular organism	6	54	0.0872657
GO:0032147	activation of protein kinase activity	6	54	0.0872657
GO:0000226	microtubule cytoskeleton organization	10	134	0.0872657
GO:0051783	regulation of nuclear division	5	38	0.0916243
GO:0044092	negative regulation of molecular function	5	38	0.0916243
GO:0008295	spermidine biosynthetic process	3	12	0.101455
GO:0045860	positive regulation of protein kinase activity	6	56	0.102351
GO:0051301	cell division	9	116	0.104183
GO:0044093	positive regulation of molecular function	10	138	0.104183
GO:0048522	positive regulation of cellular process	29	635	0.107697
GO:0030154	cell differentiation	11	162	0.108624
GO:0033674	positive regulation of kinase activity	6	57	0.108624
GO:0042545	cell wall modification	8	96	0.108627
GO:1902292	cell cycle DNA replication initiation	2	4	0.116257
GO:1902315	nuclear cell cycle DNA replication initiation	2	4	0.116257
GO:1902975	mitotic DNA replication initiation	2	4	0.116257
GO:0009416	response to light stimulus	15	252	0.116535
GO:1901700	response to oxygen-containing compound	24	496	0.116535
GO:0008216	spermidine metabolic process	3	13	0.120887
GO:0016998	cell wall macromolecule catabolic process	6	60	0.135272
GO:0001934	positive regulation of protein phosphorylation	6	61	0.146118
GO:1901575	organic substance catabolic process	55	1442	0.146118
GO:0009314	response to radiation	15	264	0.146118
GO:0007140	male meiotic nuclear division	3	14	0.146118
GO:0006020	inositol metabolic process	3	14	0.146118
GO:0140013	meiotic nuclear division	3	14	0.146118
GO:0006878	cellular copper ion homeostasis	3	14	0.146118
GO:1901136	carbohydrate derivative catabolic process	7	81	0.14661
GO:1903046	meiotic cell cycle process	8	102	0.147062
GO:0046942	carboxylic acid transport	9	125	0.153677
GO:0015849	organic acid transport	9	125	0.153677
GO:0006865	amino acid transport	7	82	0.154073
GO:0009808	lignin metabolic process	10	150	0.166677
GO:0000280	nuclear division	3	15	0.170872
GO:0055070	copper ion homeostasis	3	15	0.170872
GO:0006557	S-adenosylmethioninamine biosynthetic process	2	5	0.170872
GO:0046499	S-adenosylmethioninamine metabolic process	2	5	0.170872
GO:0033356	UDP-L-arabinose metabolic process	2	5	0.170872
GO:0009611	response to wounding	5	46	0.177406
GO:0042327	positive regulation of phosphorylation	6	65	0.181121
GO:0048869	cellular developmental process	12	202	0.182593
GO:0016052	carbohydrate catabolic process	17	323	0.182593
GO:1901565	organonitrogen compound catabolic process	24	514	0.18566
GO:0046148	pigment biosynthetic process	7	86	0.187036
GO:0044036	cell wall macromolecule metabolic process	11	179	0.193723
GO:0032270	positive regulation of cellular protein metabolic process	9	134	0.2186
GO:0042744	hydrogen peroxide catabolic process	9	134	0.2186
GO:0051247	positive regulation of protein metabolic process	9	135	0.226815
GO:1904666	regulation of ubiquitin protein ligase activity	3	17	0.227179
GO:0019310	inositol catabolic process	2	6	0.234792
GO:1903825	organic acid transmembrane transport	7	92	0.251603
GO:1905039	carboxylic acid transmembrane transport	7	92	0.251603
GO:0042743	hydrogen peroxide metabolic process	9	138	0.251946
GO:0009768	photosynthesis, light harvesting in photosystem I	3	18	0.259352
GO:0005976	polysaccharide metabolic process	25	568	0.261691
GO:0080167	response to karrikin	3	19	0.294996
GO:2001251	negative regulation of chromosome organization	4	35	0.295896
GO:0036388	pre-replicative complex assembly	2	7	0.300783
GO:1902584	positive regulation of response to water deprivation	2	7	0.300783
GO:1902299	pre-replicative complex assembly involved in cell cycle DNA replication	2	7	0.300783
GO:0000819	sister chromatid segregation	2	7	0.300783
GO:0006267	pre-replicative complex assembly involved in nuclear cell cycle DNA replication	2	7	0.300783
GO:0003333	amino acid transmembrane transport	6	75	0.310651
GO:0051128	regulation of cellular component organization	12	214	0.32597
GO:0009699	phenylpropanoid biosynthetic process	6	76	0.328188
GO:0051493	regulation of cytoskeleton organization	5	56	0.344596
GO:0045893	positive regulation of transcription, DNA-templated	17	349	0.357125
GO:1902680	positive regulation of RNA biosynthetic process	17	349	0.357125
GO:1903508	positive regulation of nucleic acid-templated transcription	17	349	0.357125
GO:0090378	seed trichome elongation	3	21	0.36294
GO:0030071	regulation of mitotic metaphase/anaphase transition	3	21	0.36294
GO:0051438	regulation of ubiquitin-protein transferase activity	3	21	0.36294
GO:1902099	regulation of metaphase/anaphase transition of cell cycle	3	21	0.36294
GO:0010345	suberin biosynthetic process	2	8	0.370029
GO:0051254	positive regulation of RNA metabolic process	17	358	0.382689
GO:0008150	biological_process	512	18365	0.385106
GO:0044550	secondary metabolite biosynthetic process	6	80	0.388362
GO:0015711	organic anion transport	9	152	0.393249
GO:1903320	regulation of protein modification by small protein conjugation or removal	3	22	0.393915
GO:1905818	regulation of chromosome separation	3	22	0.393915
GO:0031396	regulation of protein ubiquitination	3	22	0.393915
GO:0010965	regulation of mitotic sister chromatid separation	3	22	0.393915
GO:0034605	cellular response to heat	5	60	0.414223
GO:0007166	cell surface receptor signaling pathway	3	23	0.426965
GO:0010639	negative regulation of organelle organization	5	61	0.426965
GO:0042401	cellular biogenic amine biosynthetic process	4	41	0.426965
GO:0009309	amine biosynthetic process	4	41	0.426965
GO:0007051	spindle organization	4	41	0.426965
GO:0015996	chlorophyll catabolic process	2	9	0.426965
GO:0006787	porphyrin-containing compound catabolic process	2	9	0.426965
GO:0046149	pigment catabolic process	2	9	0.426965
GO:0033015	tetrapyrrole catabolic process	2	9	0.426965
GO:0072593	reactive oxygen species metabolic process	9	157	0.42908
GO:0051129	negative regulation of cellular component organization	5	62	0.42908
GO:0006996	organelle organization	37	968	0.42908
GO:0000075	cell cycle checkpoint	4	42	0.42908
GO:0009826	unidimensional cell growth	6	85	0.42908
GO:0051784	negative regulation of nuclear division	3	24	0.42908
GO:0006596	polyamine biosynthetic process	3	24	0.42908
GO:0033047	regulation of mitotic sister chromatid segregation	3	24	0.42908
GO:0048589	developmental growth	7	109	0.42908
GO:0098656	anion transmembrane transport	7	109	0.42908
GO:0045786	negative regulation of cell cycle	5	63	0.42908
GO:0006820	anion transport	11	208	0.42908
GO:1903321	negative regulation of protein modification by small protein conjugation or removal	1	1	0.42908
GO:2000123	positive regulation of stomatal complex development	1	1	0.42908
GO:0015810	aspartate transmembrane transport	1	1	0.42908
GO:0019755	one-carbon compound transport	1	1	0.42908
GO:0010425	DNA methylation on cytosine within a CNG sequence	1	1	0.42908
GO:0051444	negative regulation of ubiquitin-protein transferase activity	1	1	0.42908
GO:0019265	glycine biosynthetic process, by transamination of glyoxylate	1	1	0.42908
GO:1990505	mitotic DNA replication maintenance of fidelity	1	1	0.42908
GO:0006273	lagging strand elongation	1	1	0.42908
GO:0051567	histone H3-K9 methylation	1	1	0.42908
GO:1901332	negative regulation of lateral root development	1	1	0.42908
GO:0006949	syncytium formation	1	1	0.42908
GO:0031397	negative regulation of protein ubiquitination	1	1	0.42908
GO:0080170	hydrogen peroxide transmembrane transport	1	1	0.42908
GO:0051598	meiotic recombination checkpoint	1	1	0.42908
GO:1902288	regulation of defense response to oomycetes	1	1	0.42908
GO:1902289	negative regulation of defense response to oomycetes	1	1	0.42908
GO:1990426	mitotic recombination-dependent replication fork processing	1	1	0.42908
GO:0015827	tryptophan transport	1	1	0.42908
GO:0015801	aromatic amino acid transport	1	1	0.42908
GO:0046688	response to copper ion	1	1	0.42908
GO:1903795	regulation of inorganic anion transmembrane transport	1	1	0.42908
GO:0015840	urea transport	1	1	0.42908
GO:0071918	urea transmembrane transport	1	1	0.42908
GO:0070989	oxidative demethylation	1	1	0.42908
GO:0035511	oxidative DNA demethylation	1	1	0.42908
GO:2000185	regulation of phosphate transmembrane transport	1	1	0.42908
GO:1902298	cell cycle DNA replication maintenance of fidelity	1	1	0.42908
GO:1904667	negative regulation of ubiquitin protein ligase activity	1	1	0.42908
GO:0010966	regulation of phosphate transport	1	1	0.42908
GO:0044728	DNA methylation or demethylation	3	25	0.433958
GO:0033045	regulation of sister chromatid segregation	3	26	0.474503
GO:0006304	DNA modification	3	26	0.474503
GO:0042546	cell wall biogenesis	11	215	0.474669
GO:0042537	benzene-containing compound metabolic process	4	46	0.505815
GO:0051983	regulation of chromosome segregation	3	27	0.514601
GO:0010557	positive regulation of macromolecule biosynthetic process	17	379	0.514601
GO:0045935	positive regulation of nucleobase-containing compound metabolic process	17	380	0.518315
GO:0010628	positive regulation of gene expression	17	384	0.535986
GO:0065003	protein-containing complex assembly	21	508	0.546752
GO:0044248	cellular catabolic process	44	1231	0.553617
GO:0031328	positive regulation of cellular biosynthetic process	17	388	0.554317
GO:0006270	DNA replication initiation	3	28	0.554317
GO:0009891	positive regulation of biosynthetic process	17	392	0.5754
GO:0007052	mitotic spindle organization	2	12	0.57605
GO:1902850	microtubule cytoskeleton organization involved in mitosis	2	12	0.57605
GO:1903959	regulation of anion transmembrane transport	2	12	0.57605
GO:0098813	nuclear chromosome segregation	2	12	0.57605
GO:0033044	regulation of chromosome organization	5	72	0.595935
GO:0065004	protein-DNA complex assembly	5	72	0.595935
GO:0006576	cellular biogenic amine metabolic process	4	50	0.612112
GO:0044106	cellular amine metabolic process	4	50	0.612112
GO:0006595	polyamine metabolic process	3	30	0.621787
GO:0007093	mitotic cell cycle checkpoint	3	30	0.621787
GO:2000816	negative regulation of mitotic sister chromatid separation	2	13	0.621787
GO:0007094	mitotic spindle assembly checkpoint	2	13	0.621787
GO:0044070	regulation of anion transport	2	13	0.621787
GO:1905819	negative regulation of chromosome separation	2	13	0.621787
GO:0008356	asymmetric cell division	2	13	0.621787
GO:0033046	negative regulation of sister chromatid segregation	2	13	0.621787
GO:0033048	negative regulation of mitotic sister chromatid segregation	2	13	0.621787
GO:2000070	regulation of response to water deprivation	2	13	0.621787
GO:0000727	double-strand break repair via break-induced replication	2	13	0.621787
GO:0071174	mitotic spindle checkpoint	2	13	0.621787
GO:0071173	spindle assembly checkpoint	2	13	0.621787
GO:0031577	spindle checkpoint	2	13	0.621787
GO:0045841	negative regulation of mitotic metaphase/anaphase transition	2	13	0.621787
GO:0051985	negative regulation of chromosome segregation	2	13	0.621787
GO:0070828	heterochromatin organization	2	13	0.621787
GO:1902100	negative regulation of metaphase/anaphase transition of cell cycle	2	13	0.621787
GO:0090114	COPII-coated vesicle budding	2	13	0.621787
GO:0007154	cell communication	5	74	0.623156
GO:0009308	amine metabolic process	6	99	0.637093
GO:0051225	spindle assembly	3	31	0.641503
GO:0007088	regulation of mitotic nuclear division	3	31	0.641503
GO:0060560	developmental growth involved in morphogenesis	6	100	0.641503
GO:0009072	aromatic amino acid family metabolic process	6	101	0.641503
GO:0031669	cellular response to nutrient levels	4	53	0.641503
Cellular component
GO:0032993	protein-DNA complex	18	97	0.000170476
GO:0000307	cyclin-dependent protein kinase holoenzyme complex	11	48	0.000170476
GO:0031225	anchored component of membrane	19	117	0.000170476
GO:0000786	nucleosome	17	75	0.000170476
GO:0044815	DNA packaging complex	18	89	0.000170476
GO:0005875	microtubule associated complex	14	91	0.000170476
GO:0046658	anchored component of plasma membrane	18	106	0.000170476
GO:0005874	microtubule	21	230	0.000170476
GO:1902554	serine/threonine protein kinase complex	11	66	0.000170476
GO:0099512	supramolecular fiber	22	235	0.000170476
GO:0099513	polymeric cytoskeletal fiber	22	235	0.000170476
GO:0099081	supramolecular polymer	22	235	0.000170476
GO:0031226	intrinsic component of plasma membrane	24	238	0.000181991
GO:0005871	kinesin complex	10	55	0.000181991
GO:1902911	protein kinase complex	11	68	0.000181991
GO:0005618	cell wall	35	432	0.000181991
GO:0030312	external encapsulating structure	35	432	0.000181991
GO:0005576	extracellular region	61	737	0.000199753
GO:0099080	supramolecular complex	24	312	0.000292279
GO:0031978	plastid thylakoid lumen	5	11	0.000386695
GO:0009543	chloroplast thylakoid lumen	5	11	0.000386695
GO:0031977	thylakoid lumen	6	22	0.000996838
GO:0051233	spindle midzone	3	4	0.00369539
GO:0005634	nucleus	133	3668	0.00461546
GO:0048046	apoplast	18	261	0.00929284
GO:0009505	plant-type cell wall	11	148	0.0617838
GO:0009522	photosystem I	6	50	0.0634624
GO:0005737	cytoplasm	67	1763	0.0686459
GO:0061695	transferase complex, transferring phosphorus-containing groups	12	176	0.0771635
GO:0000790	nuclear chromatin	5	37	0.0847915
GO:0009521	photosystem	7	83	0.163447
GO:0005815	microtubule organizing center	4	31	0.210146
GO:0009524	phragmoplast	3	17	0.227179
GO:0009523	photosystem II	5	52	0.268012
GO:0005813	centrosome	3	24	0.42908
GO:0061673	mitotic spindle astral microtubule	1	1	0.42908
GO:0032797	SMN complex	1	1	0.42908
GO:0032133	chromosome passenger complex	1	1	0.42908
GO:0000780	condensed nuclear chromosome, centromeric region	1	1	0.42908
GO:0000235	astral microtubule	1	1	0.42908
GO:1990023	mitotic spindle midzone	1	1	0.42908
GO:0031616	spindle pole centrosome	1	1	0.42908
GO:0042555	MCM complex	2	10	0.434669
GO:0005876	spindle microtubule	2	11	0.509736
GO:0016607	nuclear speck	3	29	0.591714
GO:0110165	cellular anatomical entity	598	21920	0.621787
GO:0033180	proton-transporting V-type ATPase, V1 domain	2	13	0.621787
GO:0005819	spindle	3	31	0.641503
Molecular function
GO:0019887	protein kinase regulator activity	13	68	0.000170476
GO:0043621	protein self-association	15	69	0.000170476
GO:0003777	microtubule motor activity	21	132	0.000170476
GO:0015631	tubulin binding	27	244	0.000170476
GO:0019207	kinase regulator activity	14	75	0.000170476
GO:0050350	trihydroxystilbene synthase activity	16	30	0.000170476
GO:0008092	cytoskeletal protein binding	31	421	0.000170476
GO:0016538	cyclin-dependent protein serine/threonine kinase regulator activity	12	53	0.000170476
GO:0030234	enzyme regulator activity	35	470	0.000170476
GO:0003774	motor activity	22	215	0.000170476
GO:0016682	oxidoreductase activity, acting on diphenols and related substances as donors, oxygen as acceptor	15	127	0.000179779
GO:0051082	unfolded protein binding	21	217	0.000179779
GO:0046982	protein heterodimerization activity	15	111	0.000179779
GO:0008017	microtubule binding	27	218	0.000181991
GO:0016747	transferase activity, transferring acyl groups other than amino-acyl groups	37	539	0.000190791
GO:0098772	molecular function regulator	37	547	0.000215848
GO:0005515	protein binding	104	2415	0.000293227
GO:0016746	transferase activity, transferring acyl groups	39	637	0.000313469
GO:0016679	oxidoreductase activity, acting on diphenols and related substances as donors	15	140	0.000375622
GO:0019901	protein kinase binding	11	84	0.000773034
GO:0004857	enzyme inhibitor activity	18	211	0.000779716
GO:0008574	ATP-dependent microtubule motor activity, plus-end-directed	4	7	0.000957112
GO:1990939	ATP-dependent microtubule motor activity	4	8	0.0017627
GO:0016491	oxidoreductase activity	112	2900	0.00176592
GO:0005199	structural constituent of cell wall	6	25	0.00208408
GO:0004097	catechol oxidase activity	4	9	0.00293221
GO:0019900	kinase binding	11	104	0.00460808
GO:0008061	chitin binding	7	44	0.00667058
GO:0003677	DNA binding	103	2765	0.0106774
GO:0052716	hydroquinone:oxygen oxidoreductase activity	10	101	0.0145401
GO:0016798	hydrolase activity, acting on glycosyl bonds	34	691	0.0186417
GO:0052689	carboxylic ester hydrolase activity	16	234	0.0203581
GO:0005507	copper ion binding	14	191	0.0224144
GO:0004867	serine-type endopeptidase inhibitor activity	3	7	0.0243249
GO:0004553	hydrolase activity, hydrolyzing O-glycosyl compounds	32	642	0.0250695
GO:0043565	sequence-specific DNA binding	36	777	0.0362341
GO:0004014	adenosylmethionine decarboxylase activity	3	8	0.0362384
GO:0015116	sulfate transmembrane transporter activity	5	31	0.0446984
GO:0003700	DNA-binding transcription factor activity	38	851	0.0532677
GO:0004568	chitinase activity	6	48	0.0553519
GO:0008271	secondary active sulfate transmembrane transporter activity	4	20	0.0579065
GO:0045548	phenylalanine ammonia-lyase activity	4	20	0.0579065
GO:0031492	nucleosomal DNA binding	4	21	0.0655962
GO:0008453	alanine-glyoxylate transaminase activity	2	3	0.0679234
GO:0016841	ammonia-lyase activity	4	23	0.0872657
GO:0140110	transcription regulator activity	41	977	0.0916243
GO:1990837	sequence-specific double-stranded DNA binding	19	351	0.102351
GO:1901682	sulfur compound transmembrane transporter activity	5	41	0.119682
GO:0042973	glucan endo-1,3-beta-D-glucosidase activity	3	14	0.146118
GO:0045330	aspartyl esterase activity	7	83	0.163447
GO:0004506	squalene monooxygenase activity	2	5	0.170872
GO:0016297	acyl-[acyl-carrier-protein] hydrolase activity	2	5	0.170872
GO:0052691	UDP-arabinopyranose mutase activity	2	5	0.170872
GO:0046910	pectinesterase inhibitor activity	5	47	0.190596
GO:0030599	pectinesterase activity	7	87	0.196407
GO:0016705	oxidoreductase activity, acting on paired donors, with incorporation or reduction of molecular oxygen	31	729	0.226815
GO:0050113	inositol oxygenase activity	2	6	0.234792
GO:0003682	chromatin binding	11	187	0.251603
GO:0008509	anion transmembrane transporter activity	14	263	0.255225
GO:0000978	RNA polymerase II cis-regulatory region sequence-specific DNA binding	3	18	0.259352
GO:0000976	transcription regulatory region sequence-specific DNA binding	16	313	0.260351
GO:0001067	regulatory region nucleic acid binding	16	313	0.260351
GO:0031491	nucleosome binding	4	34	0.271444
GO:0016209	antioxidant activity	13	239	0.288047
GO:0005375	copper ion transmembrane transporter activity	3	19	0.294996
GO:0015926	glucosidase activity	6	74	0.297155
GO:0016413	O-acetyltransferase activity	5	56	0.344596
GO:0046906	tetrapyrrole binding	34	850	0.353412
GO:0015020	glucuronosyltransferase activity	3	21	0.36294
GO:0035250	UDP-galactosyltransferase activity	3	21	0.36294
GO:0016630	protochlorophyllide reductase activity	2	8	0.370029
GO:0015171	amino acid transmembrane transporter activity	6	79	0.370029
GO:0008422	beta-glucosidase activity	5	59	0.393915
GO:0015301	anion:anion antiporter activity	4	40	0.414223
GO:0140323	solute:anion antiporter activity	4	40	0.414223
GO:0051213	dioxygenase activity	14	279	0.425485
GO:0016837	carbon-oxygen lyase activity, acting on polysaccharides	3	23	0.426965
GO:0030570	pectate lyase activity	3	23	0.426965
GO:0140414	phosphopantetheine-dependent carrier activity	2	9	0.426965
GO:0044620	ACP phosphopantetheine attachment site binding	2	9	0.426965
GO:0000036	acyl carrier activity	2	9	0.426965
GO:0051192	prosthetic group binding	2	9	0.426965
GO:0047746	chlorophyllase activity	2	9	0.426965
GO:0008374	O-acyltransferase activity	8	132	0.42908
GO:0004497	monooxygenase activity	24	577	0.42908
GO:0016709	oxidoreductase activity, acting on paired donors, with incorporation or reduction of molecular oxygen, NAD(P)H as one donor, and incorporation of one atom of oxygen	16	342	0.42908
GO:0004851	uroporphyrin-III C-methyltransferase activity	1	1	0.42908
GO:0072586	DNA topoisomerase type II (double strand cut, ATP-hydrolyzing) regulator activity	1	1	0.42908
GO:0072587	DNA topoisomerase type II (double strand cut, ATP-hydrolyzing) activator activity	1	1	0.42908
GO:0008891	glycolate oxidase activity	1	1	0.42908
GO:0032450	maltose alpha-glucosidase activity	1	1	0.42908
GO:0044547	DNA topoisomerase binding	1	1	0.42908
GO:0004760	serine-pyruvate transaminase activity	1	1	0.42908
GO:0051747	cytosine C-5 DNA demethylase activity	1	1	0.42908
GO:0050281	serine-glyoxylate transaminase activity	1	1	0.42908
GO:0016713	oxidoreductase activity, acting on paired donors, with incorporation or reduction of molecular oxygen, reduced iron-sulfur protein as one donor, and incorporation of one atom of oxygen	1	1	0.42908
GO:0047130	saccharopine dehydrogenase (NADP+, L-lysine-forming) activity	1	1	0.42908
GO:0046608	carotenoid isomerase activity	1	1	0.42908
GO:0004753	saccharopine dehydrogenase activity	1	1	0.42908
GO:0047485	protein N-terminus binding	1	1	0.42908
GO:0004755	saccharopine dehydrogenase (NADP+, L-glutamate-forming) activity	1	1	0.42908
GO:0004558	alpha-1,4-glucosidase activity	1	1	0.42908
GO:0050105	L-gulonolactone oxidase activity	1	1	0.42908
GO:0035514	DNA demethylase activity	1	1	0.42908
GO:0018685	alkane 1-monooxygenase activity	1	1	0.42908
GO:0043115	precorrin-2 dehydrogenase activity	1	1	0.42908
GO:0043734	DNA-N1-methyladenine dioxygenase activity	1	1	0.42908
GO:0015103	inorganic anion transmembrane transporter activity	7	111	0.431984
GO:0031490	chromatin DNA binding	4	45	0.474503
GO:0016706	2-oxoglutarate-dependent dioxygenase activity	4	45	0.474503
GO:0051539	4 iron, 4 sulfur cluster binding	6	90	0.487513
GO:0016701	oxidoreductase activity, acting on single donors with incorporation of molecular oxygen	6	91	0.508833
GO:0019210	kinase inhibitor activity	2	11	0.509736
GO:0004312	fatty acid synthase activity	3	27	0.514601
GO:0003690	double-stranded DNA binding	21	505	0.534259
GO:0046943	carboxylic acid transmembrane transporter activity	7	119	0.563825
GO:0005342	organic acid transmembrane transporter activity	7	119	0.563825
GO:0047216	inositol 3-alpha-galactosyltransferase activity	2	12	0.57605
GO:0030145	manganese ion binding	7	121	0.59359
GO:0020037	heme binding	30	795	0.621787
GO:0045735	nutrient reservoir activity	7	123	0.621787
GO:0016684	oxidoreductase activity, acting on peroxide as acceptor	10	200	0.621787
GO:0004601	peroxidase activity	10	200	0.621787
GO:0003688	DNA replication origin binding	2	13	0.621787
GO:0004806	triglyceride lipase activity	2	13	0.621787
GO:0016717	oxidoreductase activity, acting on paired donors, with oxidation of a pair of donors resulting in the reduction of molecular oxygen to two molecules of water	3	32	0.641503

## Sheet: Table S6
Table S6. DEGs enriched in KEGG pathways in in the comparison of BN vs. PN
Gene ID	Description	KO ID	KEGG Pathway
Vitvi05g00261	PREDICTED: ABC transporter B family member 11 [Vitis vinifera]	K05658	ABC transporters
Vitvi19g00636	ABC transporter C family member 3 [Vitis vinifera]	K05665;K05666	ABC transporters
Vitvi19g00641	PREDICTED: ABC transporter C family member 3 [Vitis vinifera]	K05665;K05666	ABC transporters
Vitvi07g00311	PREDICTED: ABC transporter C family member 4 [Vitis vinifera]	K05665;K05666;cit	ABC transporters
Vitvi09g01129	ABC transporter C family member 13 OS=Arabidopsis thaliana OX=3702 GN=ABCC13 PE=2 SV=3;	K05674	ABC transporters
Vitvi06g00666	Asparagine synthetase [glutamine-hydrolyzing] 1 OS=Arabidopsis thaliana OX=3702 GN=ASN1 PE=2 SV=2;	K01953	Alanine, aspartate and glutamate metabolism
Vitvi12g02574	Glutamate synthase 1 [NADH], chloroplastic OS=Arabidopsis thaliana OX=3702 GN=GLT1 PE=1 SV=2;	K00264	Alanine, aspartate and glutamate metabolism;Nitrogen metabolism
Vitvi17g01086	PREDICTED: glutamate decarboxylase [Vitis vinifera]	K01580	Alanine, aspartate and glutamate metabolism;Taurine and hypotaurine metabolism;beta-Alanine metabolism;Butanoate metabolism
Vitvi18g02139	PREDICTED: putative 12-oxophytodienoate reductase 11 [Vitis vinifera]	K05894	alpha-Linolenic acid metabolism
Vitvi18g03162	PREDICTED: putative 12-oxophytodienoate reductase 11 [Vitis vinifera]	K05894	alpha-Linolenic acid metabolism
Vitvi14g01246	PREDICTED: allene oxide cyclase [Vitis vinifera]	K10525	alpha-Linolenic acid metabolism
Vitvi12g00405	Fatty acid hydroperoxide lyase, chloroplastic OS=Solanum lycopersicum OX=4081 GN=HPL PE=1 SV=1;	K10528;pxb	alpha-Linolenic acid metabolism
Vitvi16g01979	class III chitinase [Vitis vinifera]	K01183	Amino sugar and nucleotide sugar metabolism
Vitvi15g01035	PREDICTED: acidic endochitinase [Vitis vinifera]	K01183	Amino sugar and nucleotide sugar metabolism
Vitvi05g02250	PREDICTED: endochitinase A isoform X1 [Vitis vinifera]	K01183	Amino sugar and nucleotide sugar metabolism
Vitvi05g01581	PREDICTED: endochitinase EP3 [Vitis vinifera]	K01183	Amino sugar and nucleotide sugar metabolism
Vitvi03g00206	Flags: Precursor	K20547	Amino sugar and nucleotide sugar metabolism;MAPK signaling pathway - plant
Vitvi19g02290	Phenylalanine--tRNA ligase, chloroplastic/mitochondrial OS=Arabidopsis thaliana OX=3702 GN=At3g58140 PE=1 SV=1;	K01889	Aminoacyl-tRNA biosynthesis
Vitvi14g03047	PREDICTED: probable prolyl 4-hydroxylase 6 [Vitis vinifera]	K00472	Arginine and proline metabolism
Vitvi01g01301	PREDICTED: uncharacterized protein LOC100249617 [Vitis vinifera]	K01246	Base excision repair
Vitvi01g01169	PREDICTED: uncharacterized protein LOC100256507 [Vitis vinifera]	K01246	Base excision repair
Vitvi08g01826	NADPH-dependent aldehyde reductase-like protein, chloroplastic OS=Arabidopsis thaliana OX=3702 GN=At3g03980 PE=3 SV=1;	K00059	Biotin metabolism;Fatty acid biosynthesis
Vitvi08g00223	PREDICTED: prolycopene isomerase, chloroplastic [Vitis vinifera]	K09835	Carotenoid biosynthesis
Vitvi03g00508	PREDICTED: abscisic acid 8'-hydroxylase 4 [Vitis vinifera]	K09843	Carotenoid biosynthesis
Vitvi01g00499	PREDICTED: adagio protein 3 [Vitis vinifera]	K12116	Circadian rhythm - plant
Vitvi09g00225	PREDICTED: protein EARLY FLOWERING 3 [Vitis vinifera]	K12125	Circadian rhythm - plant
Vitvi08g01139	PREDICTED: two-component response regulator-like APRR7 isoform X1 [Vitis vinifera]	K12129	Circadian rhythm - plant
Vitvi16g01340	PREDICTED: two-component response regulator-like APRR5 isoform X1 [Vitis vinifera]	K12130	Circadian rhythm - plant
Vitvi16g00772	PREDICTED: chalcone synthase [Vitis vinifera]	K00660	Circadian rhythm - plant;Flavonoid biosynthesis
Vitvi07g03177	PREDICTED: phosphoenolpyruvate carboxykinase [ATP] [Vitis vinifera]	K01610	Citrate cycle (TCA cycle);Glycolysis / Gluconeogenesis;Pyruvate metabolism;Carbon fixation in photosynthetic organisms
Vitvi00g01382	Phosphoenolpyruvate carboxykinase;	K01610	Citrate cycle (TCA cycle);Glycolysis / Gluconeogenesis;Pyruvate metabolism;Carbon fixation in photosynthetic organisms
Vitvi19g00138	PREDICTED: malate dehydrogenase, mitochondrial [Vitis vinifera]	K00026	Citrate cycle (TCA cycle);Glyoxylate and dicarboxylate metabolism;Pyruvate metabolism;Carbon fixation in photosynthetic organisms;Cysteine and methionine metabolism
Vitvi01g00478	PREDICTED: probable peroxygenase 4 isoform X3 [Vitis vinifera]	K17991	Cutin, suberine and wax biosynthesis
Vitvi07g00011	PREDICTED: cytochrome P450 94A1 [Vitis vinifera]	K20769;K13407	Cutin, suberine and wax biosynthesis
Vitvi04g01589	L-3-cyanoalanine synthase 1, mitochondrial [Vitis vinifera]	K13034	Cyanoamino acid metabolism;Cysteine and methionine metabolism;Sulfur metabolism
Vitvi13g00169	PREDICTED: phenylalanine N-monooxygenase [Vitis vinifera]	K12153	Cyanoamino acid metabolism;Glucosinolate biosynthesis
Vitvi13g02534	Beta-glucosidase 13 OS=Oryza sativa subsp. japonica OX=39947 GN=BGLU13 PE=2 SV=2;	K01188;K22279	Cyanoamino acid metabolism;Phenylpropanoid biosynthesis;Starch and sucrose metabolism
Vitvi01g00286	PREDICTED: homocysteine S-methyltransferase 1 [Vitis vinifera]	K00547	Cysteine and methionine metabolism
Vitvi11g00195	PREDICTED: 1-aminocyclopropane-1-carboxylate oxidase 1 [Vitis vinifera]	K05933	Cysteine and methionine metabolism
Vitvi08g00816	PREDICTED: alanine--glyoxylate aminotransferase 2 homolog 2, mitochondrial [Vitis vinifera]	K00827	Cysteine and methionine metabolism;Alanine, aspartate and glutamate metabolism;Valine, leucine and isoleucine degradation;Glycine, serine and threonine metabolism
Vitvi11g01521	unnamed protein product, partial [Vitis vinifera]	K01611	Cysteine and methionine metabolism;Arginine and proline metabolism
Vitvi01g00502	Aspartate-semialdehyde dehydrogenase OS=Synechocystis sp.;	K00133	Cysteine and methionine metabolism;Lysine biosynthesis;Glycine, serine and threonine metabolism;Monobactam biosynthesis
Vitvi15g01093	PREDICTED: 1-aminocyclopropane-1-carboxylate synthase 1 [Vitis vinifera]	K20772	Cysteine and methionine metabolism;MAPK signaling pathway - plant
Vitvi02g00533	PREDICTED: L-lactate dehydrogenase A [Vitis vinifera]	K00016	Cysteine and methionine metabolism;Propanoate metabolism;Pyruvate metabolism;Glycolysis / Gluconeogenesis
Vitvi10g00224	PREDICTED: serine acetyltransferase 1, chloroplastic [Vitis vinifera]	K00640	Cysteine and methionine metabolism;Sulfur metabolism
Vitvi19g00654	PREDICTED: serine acetyltransferase 1, chloroplastic [Vitis vinifera]	K00640	Cysteine and methionine metabolism;Sulfur metabolism
Vitvi00g01383	PREDICTED: phosphoserine aminotransferase 2, chloroplastic [Vitis vinifera]	K00831	Cysteine and methionine metabolism;Vitamin B6 metabolism;Glycine, serine and threonine metabolism
Vitvi04g02316	PREDICTED: phosphoserine aminotransferase 2, chloroplastic, partial [Vitis vinifera]	K00831	Cysteine and methionine metabolism;Vitamin B6 metabolism;Glycine, serine and threonine metabolism
Vitvi01g02071	Endoplasmic reticulum oxidoreductin-1 [Vitis vinifera]	K07937	Endocytosis
Vitvi19g02006	Vacuolar protein sorting-associated protein 22-like 1 [Vitis vinifera]	K12188	Endocytosis
Vitvi06g00455	PREDICTED: epsin-3 [Vitis vinifera]	K12471	Endocytosis
Vitvi11g00724	PREDICTED: heat shock 70 kDa protein [Vitis vinifera]	K03283	Endocytosis;Protein processing in endoplasmic reticulum;Spliceosome
Vitvi08g02189	PREDICTED: heat shock cognate 70 kDa protein 2 [Vitis vinifera]	K03283	Endocytosis;Protein processing in endoplasmic reticulum;Spliceosome
Vitvi06g00443	PREDICTED: heat shock cognate 70 kDa protein 2 [Vitis vinifera]	K03283	Endocytosis;Protein processing in endoplasmic reticulum;Spliceosome
Vitvi18g02066	PREDICTED: stromal 70 kDa heat shock-related protein, chloroplastic [Vitis vinifera]	K03283	Endocytosis;Protein processing in endoplasmic reticulum;Spliceosome
Vitvi18g01231	PREDICTED: stearoyl-[acyl-carrier-protein] 9-desaturase 6, chloroplastic [Vitis vinifera]	K03921	Fatty acid biosynthesis;Biosynthesis of unsaturated fatty acids
Vitvi18g02014	PREDICTED: UDP-glycosyltransferase 88F3 [Vitis vinifera]	K22845	Flavonoid biosynthesis
Vitvi06g01896	PREDICTED: flavonoid 3',5'-hydroxylase 2 [Vitis vinifera]	K13083	Flavonoid biosynthesis;Flavone and flavonol biosynthesis
Vitvi06g01888	PREDICTED: flavonoid 3',5'-hydroxylase 2 [Vitis vinifera]	K13083	Flavonoid biosynthesis;Flavone and flavonol biosynthesis
Vitvi17g00885	PREDICTED: galactinol--sucrose galactosyltransferase [Vitis vinifera]	cic;K06617	Galactose metabolism
Vitvi07g00457	PREDICTED: galactinol synthase 1 [Vitis vinifera]	K18819	Galactose metabolism
Vitvi14g02461	PREDICTED: galactinol synthase 2 [Vitis vinifera]	K18819	Galactose metabolism
Vitvi07g00286	Glutathione S-transferase [Vitis vinifera]	K00799	Glutathione metabolism
Vitvi07g00285	Glutathione S-transferase [Vitis vinifera]	K00799	Glutathione metabolism
Vitvi05g01963	Glutathione transferase GST 23 [Vitis vinifera]	K00799	Glutathione metabolism
Vitvi08g01129	PREDICTED: glutathione S-transferase L3 [Vitis vinifera]	K00799	Glutathione metabolism
Vitvi19g01021	PREDICTED: glutathione S-transferase U25-like [Vitis vinifera]	K00799	Glutathione metabolism
Vitvi08g02226	PREDICTED: glutathione S-transferase U8 [Vitis vinifera]	K00799	Glutathione metabolism
Vitvi08g02227	PREDICTED: glutathione S-transferase U8 [Vitis vinifera]	K00799	Glutathione metabolism
Vitvi08g00957	PREDICTED: glutathione transferase GST 23 [Vitis vinifera]	K00799	Glutathione metabolism
Vitvi05g01961	PREDICTED: glutathione transferase GST 23 [Vitis vinifera]	K00799	Glutathione metabolism
Vitvi05g01962	PREDICTED: glutathione transferase GST 23 [Vitis vinifera]	K00799	Glutathione metabolism
Vitvi17g01381	PREDICTED: probable glutathione S-transferase [Vitis vinifera]	K00799	Glutathione metabolism
Vitvi19g01326	PREDICTED: probable glutathione S-transferase [Vitis vinifera]	K00799	Glutathione metabolism
Vitvi19g02374	PREDICTED: probable glutathione S-transferase [Vitis vinifera]	K00799	Glutathione metabolism
Vitvi05g01959	PREDICTED: probable glutathione S-transferase [Vitis vinifera]	K00799	Glutathione metabolism
Vitvi07g00736	PREDICTED: probable glutathione S-transferase [Vitis vinifera]	K00799	Glutathione metabolism
Vitvi19g02192	PREDICTED: probable glutathione S-transferase [Vitis vinifera]	K00799	Glutathione metabolism
Vitvi19g02150	PREDICTED: probable glutathione S-transferase [Vitis vinifera]	K00799	Glutathione metabolism
Vitvi19g01048	PREDICTED: probable glutathione S-transferase [Vitis vinifera]	K00799	Glutathione metabolism
Vitvi19g02189	PREDICTED: probable glutathione S-transferase parC [Vitis vinifera]	K00799	Glutathione metabolism
Vitvi06g01727	Glutathione S-transferase U8 OS=Arabidopsis thaliana OX=3702 GN=GSTU8 PE=2 SV=1;	K00799	Glutathione metabolism
Vitvi03g01780	L-ascorbate peroxidase 1	K00434	Glutathione metabolism;Ascorbate and aldarate metabolism
Vitvi06g00358	L-ascorbate peroxidase 1	K00434	Glutathione metabolism;Ascorbate and aldarate metabolism
Vitvi13g00241	hypothetical protein VITISV_000080 [Vitis vinifera]	K21888	Glutathione metabolism;Ascorbate and aldarate metabolism
Vitvi17g01089	PREDICTED: uncharacterized protein LOC100257447 [Vitis vinifera]	K01054	Glycerolipid metabolism
Vitvi02g00785	PREDICTED: glycerol-3-phosphate acyltransferase, chloroplastic [Vitis vinifera]	K00630	Glycerophospholipid metabolism;Glycerolipid metabolism
Vitvi10g00171	PREDICTED: phosphatidate cytidylyltransferase 1, partial [Vitis vinifera]	K00981	Glycerophospholipid metabolism;Phosphatidylinositol signaling system
Vitvi14g00619	PREDICTED: probable low-specificity L-threonine aldolase 1 [Vitis vinifera]	K01620	Glycine, serine and threonine metabolism
Vitvi07g02519	Pentatricopeptide repeat-containing protein [Vitis vinifera]	K01568	Glycolysis / Gluconeogenesis
Vitvi15g01026	PREDICTED: putative glucose-6-phosphate 1-epimerase [Vitis vinifera]	K01792	Glycolysis / Gluconeogenesis
Vitvi14g01684	PREDICTED: putative glucose-6-phosphate 1-epimerase [Vitis vinifera]	K01792	Glycolysis / Gluconeogenesis
Vitvi04g01669	PREDICTED: alcohol dehydrogenase 1 [Vitis vinifera]	K18857	Glycolysis / Gluconeogenesis;alpha-Linolenic acid metabolism;Fatty acid degradation;Tyrosine metabolism
Vitvi04g01671	PREDICTED: alcohol dehydrogenase 1 [Vitis vinifera]	K18857	Glycolysis / Gluconeogenesis;alpha-Linolenic acid metabolism;Fatty acid degradation;Tyrosine metabolism
Vitvi04g01670	PREDICTED: alcohol dehydrogenase 1 isoform X1 [Vitis vinifera]	K18857	Glycolysis / Gluconeogenesis;alpha-Linolenic acid metabolism;Fatty acid degradation;Tyrosine metabolism
Vitvi01g01538	Glyceraldehyde-3-phosphate dehydrogenase 2, cytosolic OS=Oryza sativa subsp. japonica OX=39947 GN=GAPC2 PE=1 SV=1;	K00134	Glycolysis / Gluconeogenesis;Carbon fixation in photosynthetic organisms
Vitvi18g02571	PREDICTED: uncharacterized protein LOC100245371 [Vitis vinifera]	K01834	Glycolysis / Gluconeogenesis;Glycine, serine and threonine metabolism
Vitvi08g01301	PREDICTED: fructose-1,6-bisphosphatase, chloroplastic [Vitis vinifera]	K03841	Glycolysis / Gluconeogenesis;Pentose phosphate pathway;Fructose and mannose metabolism;Carbon fixation in photosynthetic organisms
Vitvi14g01820	PREDICTED: GPI ethanolamine phosphate transferase 1 isoform X1 [Vitis vinifera]	K05285	Glycosylphosphatidylinositol (GPI)-anchor biosynthesis
Vitvi07g01443	PREDICTED: GPI ethanolamine phosphate transferase 2 [Vitis vinifera]	K05310	Glycosylphosphatidylinositol (GPI)-anchor biosynthesis
Vitvi02g00338	PREDICTED: oxalate--CoA ligase [Vitis vinifera]	K22133	Glyoxylate and dicarboxylate metabolism
Vitvi18g00095	PREDICTED: catalase isozyme 1 [Vitis vinifera]	K03781	Glyoxylate and dicarboxylate metabolism;MAPK signaling pathway - plant;Tryptophan metabolism;Peroxisome
Vitvi14g01447	PREDICTED: histidine biosynthesis bifunctional protein hisIE, chloroplastic [Vitis vinifera]	K11755	Histidine metabolism
Vitvi07g01651	PREDICTED: isoflavone 2'-hydroxylase [Vitis vinifera]	K13260	Isoflavonoid biosynthesis
Vitvi07g01653	PREDICTED: isoflavone 2'-hydroxylase [Vitis vinifera]	K13260	Isoflavonoid biosynthesis
Vitvi10g02336	Polyphenol oxidase, chloroplastic OS=Vitis vinifera OX=29760 PE=1 SV=1;	K00422	Isoquinoline alkaloid biosynthesis;Tyrosine metabolism
Vitvi10g02337	Polyphenol oxidase, chloroplastic OS=Vitis vinifera OX=29760 PE=1 SV=1;	K00422	Isoquinoline alkaloid biosynthesis;Tyrosine metabolism
Vitvi10g00442	Polyphenol oxidase, chloroplastic OS=Vitis vinifera OX=29760 PE=1 SV=1;	K00422	Isoquinoline alkaloid biosynthesis;Tyrosine metabolism
Vitvi12g01610	PREDICTED: aminotransferase ALD1 [Vitis vinifera]	K10206	Lysine biosynthesis
Vitvi11g00012	Alpha-aminoadipic semialdehyde synthase OS=Arabidopsis thaliana OX=3702 GN=LKR/SDH PE=1 SV=1;	K14157	Lysine degradation
Vitvi12g02552	Copper-transporting ATPase PAA1, chloroplastic OS=Arabidopsis thaliana OX=3702 GN=PAA1 PE=1 SV=1;	K17686	MAPK signaling pathway - plant
Vitvi02g00354	Mitogen-activated protein kinase kinase kinase YODA [Vitis vinifera]	K20717	MAPK signaling pathway - plant
Vitvi11g00270	PREDICTED: probable protein phosphatase 2C 68 isoform X2 [Vitis vinifera]	K14497	MAPK signaling pathway - plant;Plant hormone signal transduction
Vitvi07g02067	hypothetical protein VITISV_012060 [Vitis vinifera]	K14516	MAPK signaling pathway - plant;Plant hormone signal transduction
Vitvi07g02065	PREDICTED: ethylene-responsive transcription factor 1B [Vitis vinifera]	K14516	MAPK signaling pathway - plant;Plant hormone signal transduction
Vitvi05g00715	PREDICTED: ethylene-responsive transcription factor 1B [Vitis vinifera]	K14516	MAPK signaling pathway - plant;Plant hormone signal transduction
Vitvi14g00564	PREDICTED: ethylene-responsive transcription factor 1B [Vitis vinifera]	K14516	MAPK signaling pathway - plant;Plant hormone signal transduction
Vitvi19g00233	PREDICTED: respiratory burst oxidase homolog protein C [Vitis vinifera]	K13447	MAPK signaling pathway - plant;Plant-pathogen interaction
Vitvi03g00743	PREDICTED: pathogenesis-related leaf protein 6 [Vitis vinifera]	K13449	MAPK signaling pathway - plant;Plant-pathogen interaction;Plant hormone signal transduction
Vitvi03g01650	PREDICTED: pathogenesis-related leaf protein 6 [Vitis vinifera]	K13449	MAPK signaling pathway - plant;Plant-pathogen interaction;Plant hormone signal transduction
Vitvi15g00307	PREDICTED: DNA mismatch repair protein MLH1 [Vitis vinifera]	K08734	Mismatch repair
Vitvi18g02024	Replication protein A 70 kDa DNA-binding subunit B OS=Arabidopsis thaliana OX=3702 GN=RPA1B PE=3 SV=1;	K07466	Mismatch repair;Homologous recombination;Nucleotide excision repair;DNA replication
Vitvi02g01415	PREDICTED: ripening-related P-450 enzyme-like isoform X1 [Vitis vinifera]	K23810	Monoterpenoid biosynthesis
Vitvi03g01281	Retrovirus-related Pol polyprotein from transposon RE1 [Vitis vinifera]	K03844	N-Glycan biosynthesis;Various types of N-glycan biosynthesis
Vitvi04g01231	PREDICTED: dolichyl-diphosphooligosaccharide--protein glycosyltransferase 48 kDa subunit isoform X3 [Vitis vinifera]	K12670	N-Glycan biosynthesis;Various types of N-glycan biosynthesis;Protein processing in endoplasmic reticulum
Vitvi17g00819	PREDICTED: carbonic anhydrase 2 isoform X1 [Vitis vinifera]	K01673	Nitrogen metabolism
Vitvi01g00735	PREDICTED: carbonic anhydrase 2 isoform X1 [Vitis vinifera]	K01673	Nitrogen metabolism
Vitvi11g00893	PREDICTED: carbonic anhydrase, chloroplastic [Vitis vinifera]	K01673	Nitrogen metabolism
Vitvi01g00824	PREDICTED: DNA polymerase lambda isoform X1 [Vitis vinifera]	K03512	Non-homologous end-joining;Base excision repair
Vitvi08g01081	PREDICTED: soluble inorganic pyrophosphatase 4 [Vitis vinifera]	K01507	Oxidative phosphorylation
Vitvi12g02137	pectin methylesterase PME1 precursor [Vitis vinifera]	K01051	Pentose and glucuronate interconversions
Vitvi11g00016	PREDICTED: pectinesterase [Vitis vinifera]	K01051	Pentose and glucuronate interconversions
Vitvi14g01635	pectate lyase precursor [Vitis vinifera]	K01728	Pentose and glucuronate interconversions
Vitvi08g01606	pectate lyase-like protein 3 precursor [Vitis vinifera]	K01728	Pentose and glucuronate interconversions
Vitvi02g00633	PREDICTED: ribose-phosphate pyrophosphokinase 1 [Vitis vinifera]	K00948	Pentose phosphate pathway;Purine metabolism
Vitvi18g00001	PREDICTED: peroxisomal nicotinamide adenine dinucleotide carrier isoform X1 [Vitis vinifera]	K13354	Peroxisome
Vitvi10g00542	Nudix hydrolase 15, mitochondrial OS=Arabidopsis thaliana OX=3702 GN=NUDT15 PE=1 SV=2;	K17879	Peroxisome
Vitvi06g01456	PREDICTED: fatty acyl-CoA reductase 3 [Vitis vinifera]	K13356	Peroxisome;Cutin, suberine and wax biosynthesis
Vitvi04g00747	PREDICTED: probable sarcosine oxidase [Vitis vinifera]	K00306	Peroxisome;Lysine degradation;Glycine, serine and threonine metabolism
Vitvi14g01929	PREDICTED: tubulin alpha chain [Vitis vinifera]	K07374	Phagosome
Vitvi06g00569	PREDICTED: tubulin beta-2 chain [Vitis vinifera]	K07375	Phagosome
Vitvi17g00047	PREDICTED: V-type proton ATPase subunit C isoform X1 [Vitis vinifera]	K02148	Phagosome;Oxidative phosphorylation
Vitvi13g02194	PREDICTED: V-type proton ATPase subunit C isoform X1 [Vitis vinifera]	K02154	Phagosome;Oxidative phosphorylation
Vitvi11g00019	PREDICTED: 1-phosphatidylinositol-3-phosphate 5-kinase FAB1B isoform X1 [Vitis vinifera]	K00921	Phagosome;Phosphatidylinositol signaling system;Inositol phosphate metabolism
Vitvi11g00967	PREDICTED: preprotein translocase subunit SCY1, chloroplastic isoform X1 [Vitis vinifera]	K10956	Phagosome;Protein export;Protein processing in endoplasmic reticulum
Vitvi05g01545	Calreticulin-3 OS=Arabidopsis thaliana OX=3702 GN=CRT3 PE=1 SV=2;	K08057	Phagosome;Protein processing in endoplasmic reticulum
Vitvi04g01198	Calreticulin-3 OS=Arabidopsis thaliana OX=3702 GN=CRT3 PE=1 SV=2;	K08057	Phagosome;Protein processing in endoplasmic reticulum
Vitvi14g00340	PREDICTED: bifunctional 3-dehydroquinate dehydratase/shikimate dehydrogenase, chloroplastic isoform X1 [Vitis vinifera]	K13832	Phenylalanine, tyrosine and tryptophan biosynthesis
Vitvi06g00111	Peroxidase 15 [Vitis vinifera]	K00430	Phenylpropanoid biosynthesis
Vitvi08g00822	PREDICTED: cationic peroxidase 1 [Vitis vinifera]	K00430	Phenylpropanoid biosynthesis
Vitvi18g00474	PREDICTED: cationic peroxidase 1-like [Vitis vinifera]	K00430	Phenylpropanoid biosynthesis
Vitvi18g00190	PREDICTED: peroxidase 64 [Vitis vinifera]	K00430	Phenylpropanoid biosynthesis
Vitvi15g00875	hypothetical protein VITISV_028012 [Vitis vinifera]	K13066	Phenylpropanoid biosynthesis
Vitvi07g03084	PREDICTED: probable mannitol dehydrogenase [Vitis vinifera]	K23232;K00083	Phenylpropanoid biosynthesis;Monoterpenoid biosynthesis
Vitvi07g03083	PREDICTED: probable mannitol dehydrogenase isoform X2 [Vitis vinifera]	K23232;K00083	Phenylpropanoid biosynthesis;Monoterpenoid biosynthesis
Vitvi11g00116	PREDICTED: phenylalanine ammonia-lyase [Vitis vinifera]	K10775	Phenylpropanoid biosynthesis;Phenylalanine metabolism
Vitvi16g00097	PREDICTED: inositol-tetrakisphosphate 1-kinase 1 [Vitis vinifera]	K00913	Phosphatidylinositol signaling system;Inositol phosphate metabolism
Vitvi06g01531	PREDICTED: photosystem I subunit O [Vitis vinifera]	K14332	Photosynthesis
Vitvi13g00590	PREDICTED: chlorophyll a-b binding protein 6, chloroplastic [Vitis vinifera]	K08907	Photosynthesis - antenna proteins
Vitvi17g00615	PREDICTED: chlorophyll a-b binding protein 4, chloroplastic [Vitis vinifera]	K08910	Photosynthesis - antenna proteins
Vitvi10g00740	PREDICTED: chlorophyll a-b binding protein of LHCII type 1 [Vitis vinifera]	K08912	Photosynthesis - antenna proteins
Vitvi18g02408	PREDICTED: chlorophyll a-b binding protein CP26, chloroplastic [Vitis vinifera]	K08916	Photosynthesis - antenna proteins
Vitvi18g00310	PREDICTED: auxin transporter-like protein 3 [Vitis vinifera]	K13946	Plant hormone signal transduction
Vitvi11g00394	PREDICTED: auxin-responsive protein IAA1 [Vitis vinifera]	K14484	Plant hormone signal transduction
Vitvi03g00586	PREDICTED: probable indole-3-acetic acid-amido synthetase GH3.1 [Vitis vinifera]	K14487	Plant hormone signal transduction
Vitvi04g01441	Auxin-responsive protein SAUR50 [Vitis vinifera]	K14488	Plant hormone signal transduction
Vitvi03g00074	PREDICTED: auxin-responsive protein SAUR24-like [Vitis vinifera]	K14488	Plant hormone signal transduction
Vitvi16g01359	PREDICTED: auxin-responsive protein SAUR32 [Vitis vinifera]	K14488	Plant hormone signal transduction
Vitvi01g00344	PREDICTED: two-component response regulator-like PRR95 isoform X1 [Vitis vinifera]	K14491;cit	Plant hormone signal transduction
Vitvi17g00732	Two-component response regulator ARR6	K14492	Plant hormone signal transduction
Vitvi18g02690	PREDICTED: BRI1 kinase inhibitor 1 [Vitis vinifera]	K14499	Plant hormone signal transduction
Vitvi11g01265	PREDICTED: probable xyloglucan endotransglucosylase/hydrolase protein 23 [Vitis vinifera]	K14504	Plant hormone signal transduction
Vitvi11g01268	PREDICTED: xyloglucan endotransglucosylase/hydrolase 2 [Vitis vinifera]	K14504	Plant hormone signal transduction
Vitvi16g01136	PREDICTED: protein SGT1 homolog isoform X2 [Vitis vinifera]	K12795	Plant-pathogen interaction
Vitvi12g00195	Calcium-dependent protein kinase 30 OS=Arabidopsis thaliana OX=3702 GN=CPK30 PE=1 SV=1;	K13412	Plant-pathogen interaction
Vitvi07g00068	Calmodulin-like protein 8 [Vitis vinifera]	K13448	Plant-pathogen interaction
Vitvi14g00468	PREDICTED: calmodulin [Vitis vinifera]	K13448	Plant-pathogen interaction
Vitvi18g00905	PREDICTED: probable calcium-binding protein CML41 [Vitis vinifera]	K13448	Plant-pathogen interaction
Vitvi18g02468	Calcium-binding protein CML37 OS=Arabidopsis thaliana OX=3702 GN=CML37 PE=2 SV=1;	K13448	Plant-pathogen interaction
Vitvi09g01570	hypothetical protein VITISV_002420 [Vitis vinifera]	K13459	Plant-pathogen interaction
Vitvi09g00416	PREDICTED: probable disease resistance protein At1g61300 isoform X1 [Vitis vinifera]	K13459	Plant-pathogen interaction
Vitvi09g01568	PREDICTED: probable disease resistance protein At5g63020 [Vitis vinifera]	K13459	Plant-pathogen interaction
Vitvi19g01827	putative disease resistance protein [Vitis vinifera]	K13459	Plant-pathogen interaction
Vitvi09g01585	Probable disease resistance protein At5g63020 OS=Arabidopsis thaliana OX=3702 GN=At5g63020 PE=2 SV=2;	K13459	Plant-pathogen interaction
Vitvi17g01520	PREDICTED: protein EDS1 [Vitis vinifera]	K18875	Plant-pathogen interaction
Vitvi05g01776	Calmodulin-4 [Vitis vinifera]	K02183	Plant-pathogen interaction;Phosphatidylinositol signaling system;MAPK signaling pathway - plant
Vitvi05g01798	PREDICTED: troponin C, skeletal muscle-like, partial [Vitis vinifera]	K02183	Plant-pathogen interaction;Phosphatidylinositol signaling system;MAPK signaling pathway - plant
Vitvi10g00217	PREDICTED: heat shock cognate protein 80 [Vitis vinifera]	K04079	Plant-pathogen interaction;Protein processing in endoplasmic reticulum
Vitvi10g02403	PREDICTED: heat shock cognate protein 80 [Vitis vinifera]	K04079	Plant-pathogen interaction;Protein processing in endoplasmic reticulum
Vitvi02g00025	PREDICTED: heat shock protein 83 [Vitis vinifera]	K04079	Plant-pathogen interaction;Protein processing in endoplasmic reticulum
Vitvi16g01103	PREDICTED: heat shock protein 83 [Vitis vinifera]	K04079	Plant-pathogen interaction;Protein processing in endoplasmic reticulum
Vitvi18g01133	PREDICTED: endoplasmin homolog [Vitis vinifera]	K09487	Plant-pathogen interaction;Protein processing in endoplasmic reticulum
Vitvi12g00683	PREDICTED: heat shock protein 90-6, mitochondrial isoform X2 [Vitis vinifera]	K09487	Plant-pathogen interaction;Protein processing in endoplasmic reticulum
Vitvi12g00346	PREDICTED: protochlorophyllide reductase [Vitis vinifera]	K00218	Porphyrin and chlorophyll metabolism
Vitvi13g01779	PREDICTED: uncharacterized protein LOC100852901 [Vitis vinifera]	K02303	Porphyrin and chlorophyll metabolism
Vitvi15g01168	PREDICTED: acetyl-coenzyme A carboxylase carboxyl transferase subunit alpha, chloroplastic [Vitis vinifera]	K01962	Propanoate metabolism;Fatty acid biosynthesis;Pyruvate metabolism
Vitvi18g00230	Protein translocase subunit SECA2, chloroplastic OS=Arabidopsis thaliana OX=3702 GN=SECA2 PE=1 SV=1;	K03070	Protein export
Vitvi18g02526	PREDICTED: thylakoidal processing peptidase 1, chloroplastic [Vitis vinifera]	K03100	Protein export
Vitvi01g01638	unnamed protein product, partial [Vitis vinifera]	K12948	Protein export
Vitvi02g00187	PREDICTED: luminal-binding protein 5 [Vitis vinifera]	K09490	Protein export;Protein processing in endoplasmic reticulum
Vitvi06g01562	PREDICTED: dnaJ protein homolog [Vitis vinifera]	K09503	Protein processing in endoplasmic reticulum
Vitvi07g00394	PREDICTED: dnaJ protein ERDJ3B [Vitis vinifera]	K09517	Protein processing in endoplasmic reticulum
Vitvi08g01234	PREDICTED: hsp70-binding protein 1 [Vitis vinifera]	K09562	Protein processing in endoplasmic reticulum
Vitvi12g00453	PREDICTED: protein disulfide isomerase-like 2-3 [Vitis vinifera]	K09584	Protein processing in endoplasmic reticulum
Vitvi04g00039	PREDICTED: derlin-1 [Vitis vinifera]	K13989	Protein processing in endoplasmic reticulum
Vitvi01g01512	Heat shock protein 21, chloroplastic [Vitis vinifera]	K13993	Protein processing in endoplasmic reticulum
Vitvi04g01792	hypothetical protein VITISV_012137 [Vitis vinifera]	K13993	Protein processing in endoplasmic reticulum
Vitvi09g00045	hypothetical protein VITISV_015797 [Vitis vinifera]	K13993	Protein processing in endoplasmic reticulum
Vitvi13g00278	PREDICTED: 15.7 kDa heat shock protein, peroxisomal [Vitis vinifera]	K13993	Protein processing in endoplasmic reticulum
Vitvi04g01795	PREDICTED: 17.1 kDa class II heat shock protein [Vitis vinifera]	K13993	Protein processing in endoplasmic reticulum
Vitvi04g01794	PREDICTED: 17.3 kDa class II heat shock protein [Vitis vinifera]	K13993	Protein processing in endoplasmic reticulum
Vitvi04g01796	PREDICTED: 17.3 kDa class II heat shock protein [Vitis vinifera]	K13993	Protein processing in endoplasmic reticulum
Vitvi04g01801	PREDICTED: 17.3 kDa class II heat shock protein [Vitis vinifera]	K13993	Protein processing in endoplasmic reticulum
Vitvi04g01802	PREDICTED: 17.3 kDa class II heat shock protein [Vitis vinifera]	K13993	Protein processing in endoplasmic reticulum
Vitvi04g01799	PREDICTED: 17.3 kDa class II heat shock protein [Vitis vinifera]	K13993	Protein processing in endoplasmic reticulum
Vitvi04g00135	PREDICTED: 17.3 kDa class II heat shock protein [Vitis vinifera]	K13993	Protein processing in endoplasmic reticulum
Vitvi04g01800	PREDICTED: 17.3 kDa class II heat shock protein-like [Vitis vinifera]	K13993	Protein processing in endoplasmic reticulum
Vitvi19g01760	PREDICTED: 17.8 kDa class I heat shock protein [Vitis vinifera]	K13993	Protein processing in endoplasmic reticulum
Vitvi04g01797	PREDICTED: 17.9 kDa class II heat shock protein-like [Vitis vinifera]	K13993	Protein processing in endoplasmic reticulum
Vitvi13g00491	PREDICTED: 18.1 kDa class I heat shock protein [Vitis vinifera]	K13993	Protein processing in endoplasmic reticulum
Vitvi13g00471	PREDICTED: 18.1 kDa class I heat shock protein [Vitis vinifera]	K13993	Protein processing in endoplasmic reticulum
Vitvi13g02024	PREDICTED: 18.1 kDa class I heat shock protein [Vitis vinifera]	K13993	Protein processing in endoplasmic reticulum
Vitvi13g00451	PREDICTED: 18.1 kDa class I heat shock protein [Vitis vinifera]	K13993	Protein processing in endoplasmic reticulum
Vitvi13g00490	PREDICTED: 18.1 kDa class I heat shock protein [Vitis vinifera]	K13993	Protein processing in endoplasmic reticulum
Vitvi13g00409	PREDICTED: 18.2 kDa class I heat shock protein [Vitis vinifera]	K13993	Protein processing in endoplasmic reticulum
Vitvi13g02014	PREDICTED: 18.2 kDa class I heat shock protein [Vitis vinifera]	K13993	Protein processing in endoplasmic reticulum
Vitvi13g00405	PREDICTED: 18.2 kDa class I heat shock protein [Vitis vinifera]	K13993	Protein processing in endoplasmic reticulum
Vitvi13g00410	PREDICTED: 18.2 kDa class I heat shock protein [Vitis vinifera]	K13993	Protein processing in endoplasmic reticulum
Vitvi13g02017	PREDICTED: 18.2 kDa class I heat shock protein [Vitis vinifera]	K13993	Protein processing in endoplasmic reticulum
Vitvi13g02016	PREDICTED: 18.2 kDa class I heat shock protein [Vitis vinifera]	K13993	Protein processing in endoplasmic reticulum
Vitvi18g02423	PREDICTED: 22.0 kDa class IV heat shock protein [Vitis vinifera]	K13993	Protein processing in endoplasmic reticulum
Vitvi02g01446	PREDICTED: 23.6 kDa heat shock protein, mitochondrial [Vitis vinifera]	K13993	Protein processing in endoplasmic reticulum
Vitvi16g00681	PREDICTED: 23.6 kDa heat shock protein, mitochondrial [Vitis vinifera]	K13993	Protein processing in endoplasmic reticulum
Vitvi02g01447	PREDICTED: small heat shock protein, chloroplastic [Vitis vinifera]	K13993	Protein processing in endoplasmic reticulum
Vitvi16g01352	PREDICTED: small heat shock protein, chloroplastic [Vitis vinifera]	K13993	Protein processing in endoplasmic reticulum
Vitvi12g02138	22.0 kDa class IV heat shock protein OS=Glycine max OX=3847 GN=HSP22.0 PE=3 SV=1;	K13993	Protein processing in endoplasmic reticulum
Vitvi05g01493	PREDICTED: eIF-2-alpha kinase GCN2 isoform X1 [Vitis vinifera]	K16196;cit	Protein processing in endoplasmic reticulum
Vitvi01g01357	PREDICTED: uridine-cytidine kinase C isoform X1 [Vitis vinifera]	K00876	Pyrimidine metabolism
Vitvi01g01236	PREDICTED: CTP synthase 1 [Vitis vinifera]	K01937	Pyrimidine metabolism
Vitvi17g01038	PREDICTED: nucleoside diphosphate kinase 2, chloroplastic isoform X2 [Vitis vinifera]	K00940	Pyrimidine metabolism;MAPK signaling pathway - plant;Purine metabolism
Vitvi05g00387	Pyruvate, phosphate dikinase, chloroplastic OS=Mesembryanthemum crystallinum OX=3544 GN=PPD PE=2 SV=1;	K01006	Pyruvate metabolism;Carbon fixation in photosynthetic organisms
Vitvi12g00188	PREDICTED: bifunctional riboflavin kinase/FMN phosphatase [Vitis vinifera]	K20884	Riboflavin metabolism
Vitvi08g01037	PREDICTED: 60S ribosomal protein L12 [Vitis vinifera]	K02870	Ribosome
Vitvi17g00930	50S ribosomal protein L19-1, chloroplastic OS=Arabidopsis thaliana OX=3702 GN=At4g17560 PE=2 SV=1;	K02884	Ribosome
Vitvi02g01321	50S ribosomal protein L25 OS=Rhodopseudomonas palustris;	K02897	Ribosome
Vitvi00g01061	50S ribosomal protein L25 OS=Anaplasma marginale;	K02897	Ribosome
Vitvi17g00899	PREDICTED: 60S ribosomal protein L27a-3 [Vitis vinifera]	K02900	Ribosome
Vitvi04g00064	PREDICTED: 60S ribosomal protein L28-1 isoform X1 [Vitis vinifera]	K02903	Ribosome
Vitvi13g01728	PREDICTED: 60S ribosomal protein L30 [Vitis vinifera]	K02908	Ribosome
Vitvi10g00123	Chromatin remodeling protein EBS [Vitis vinifera]	K02926	Ribosome
Vitvi01g00164	60S ribosomal protein L44 OS=Gossypium hirsutum OX=3635 GN=RPL44 PE=3 SV=3;	K02929	Ribosome
Vitvi09g00967	40S ribosomal protein S12 OS=Hordeum vulgare OX=4513 GN=RPS12 PE=2 SV=1;	K02951	Ribosome
Vitvi11g00162	PREDICTED: 30S ribosomal protein S16-2, chloroplastic/mitochondrial [Vitis vinifera]	K02959	Ribosome
Vitvi08g01397	PREDICTED: 40S ribosomal protein S17 [Vitis vinifera]	K02962	Ribosome
Vitvi07g00119	PREDICTED: 40S ribosomal protein S18 isoform X1 [Vitis vinifera]	K02964	Ribosome
Vitvi06g00344	40S ribosomal protein S23 OS=Fragaria ananassa OX=3747 GN=RPS23 PE=2 SV=1;	K02973	Ribosome
Vitvi07g00121	PREDICTED: 40S ribosomal protein S24-1-like [Vitis vinifera]	K02974	Ribosome
Vitvi05g00543	PREDICTED: 40S ribosomal protein S3a-1 [Vitis vinifera]	K02984	Ribosome
Vitvi11g00452	NHP2-like protein 1 OS=Xenopus laevis OX=8355 GN=snu13 PE=2 SV=1;	K12845	Ribosome biogenesis in eukaryotes;Spliceosome
Vitvi08g00126	PREDICTED: probable polyribonucleotide nucleotidyltransferase 1, chloroplastic [Vitis vinifera]	K00962	RNA degradation
Vitvi07g01524	PREDICTED: heat shock 70 kDa protein, mitochondrial [Vitis vinifera]	K04043	RNA degradation
Vitvi03g00845	PREDICTED: heat shock 70 kDa protein, mitochondrial isoform X1 [Vitis vinifera]	K04043	RNA degradation
Vitvi05g00924	PREDICTED: chaperonin CPN60-2, mitochondrial [Vitis vinifera]	K04077	RNA degradation
Vitvi06g00032	PREDICTED: ruBisCO large subunit-binding protein subunit beta, chloroplastic [Vitis vinifera]	K04077	RNA degradation
Vitvi14g01938	PREDICTED: ATP-dependent 6-phosphofructokinase 5, chloroplastic [Vitis vinifera]	K00850	RNA degradation;Glycolysis / Gluconeogenesis;Pentose phosphate pathway;Fructose and mannose metabolism;Galactose metabolism
Vitvi06g01732	DNA-directed RNA polymerases I and III subunit RPAC2 OS=Xenopus laevis OX=8355 GN=polr1d PE=3 SV=1;	K03020	RNA polymerase
Vitvi16g00204	RNA polymerase beta subunit (chloroplast) [Vitis vinifera]	K03043	RNA polymerase
Vitvi19g00498	PREDICTED: protein translation factor SUI1 homolog [Vitis vinifera]	K03113	RNA transport
Vitvi13g02054	Elongation factor 1-alpha, partial [Mucuna pruriens]	K03231	RNA transport
Vitvi06g01782	PREDICTED: eukaryotic translation initiation factor 2 subunit beta [Vitis vinifera]	K03238	RNA transport
Vitvi07g02801	PREDICTED: putative membrane-bound O-acyltransferase C24H6.01c isoform X1 [Vitis vinifera]	K14297	RNA transport
Vitvi19g01498	PREDICTED: proteinaceous RNase P 1, chloroplastic/mitochondrial isoform X2 [Vitis vinifera]	K18213	RNA transport
Vitvi18g02298	PREDICTED: valencene synthase [Vitis vinifera]	K15803	Sesquiterpenoid and triterpenoid biosynthesis
Vitvi18g02450	PREDICTED: valencene synthase [Vitis vinifera]	K15803	Sesquiterpenoid and triterpenoid biosynthesis
Vitvi19g00391	unnamed protein product, partial [Vitis vinifera]	K15803	Sesquiterpenoid and triterpenoid biosynthesis
Vitvi10g01869	Beta-amyrin synthase [Vitis vinifera]	K15813	Sesquiterpenoid and triterpenoid biosynthesis
Vitvi03g00779	PREDICTED: squalene monooxygenase [Vitis vinifera]	K00511	Sesquiterpenoid and triterpenoid biosynthesis;Steroid biosynthesis
Vitvi12g00913	PREDICTED: serine/arginine-rich splicing factor SC35 [Vitis vinifera]	K12891	Spliceosome
Vitvi06g00073	PREDICTED: serine/arginine-rich SC35-like splicing factor SCL30A [Vitis vinifera]	K12900	Spliceosome
Vitvi17g01221	PREDICTED: sucrose synthase 7 isoform X2 [Vitis vinifera]	K00695	Starch and sucrose metabolism
Vitvi10g00739	PREDICTED: probable starch synthase 4, chloroplastic/amyloplastic [Vitis vinifera]	K00703	Starch and sucrose metabolism
Vitvi02g00514	PREDICTED: probable trehalose-phosphate phosphatase F [Vitis vinifera]	K01087	Starch and sucrose metabolism
Vitvi07g00352	PREDICTED: endoglucanase 17 [Vitis vinifera]	K01179	Starch and sucrose metabolism
Vitvi10g00674	PREDICTED: alpha,alpha-trehalose-phosphate synthase [UDP-forming] 1 [Vitis vinifera]	K16055	Starch and sucrose metabolism
Vitvi09g01420	Cycloartenol synthase OS=Betula platyphylla OX=78630 GN=CASBPX1 PE=1 SV=1;	K01853	Steroid biosynthesis
Vitvi09g01413	Cycloartenol synthase OS=Glycyrrhiza glabra OX=49827 GN=GgCAS1 PE=1 SV=1;	K01853	Steroid biosynthesis
Vitvi06g00230	PREDICTED: sulfite reductase 1 [ferredoxin], chloroplastic [Vitis vinifera]	K00392	Sulfur metabolism
Vitvi08g00117	PREDICTED: plant cysteine oxidase 2 [Vitis vinifera]	K10712;K23953	Taurine and hypotaurine metabolism
Vitvi17g00554	Plant cysteine oxidase 2 OS=Arabidopsis thaliana OX=3702 GN=PCO2 PE=1 SV=1;	K10712;K23953	Taurine and hypotaurine metabolism
Vitvi10g00027	PREDICTED: thiamine thiazole synthase 2, chloroplastic [Vitis vinifera]	K03146	Thiamine metabolism
Vitvi01g01564	Adenylate kinase 4 OS=Oryza sativa subsp. japonica OX=39947 GN=ADK-B PE=2 SV=1;	K00939	Thiamine metabolism;Purine metabolism
Vitvi13g01999	PREDICTED: tropinone reductase homolog At5g06060 [Vitis vinifera]	K08081	Tropane, piperidine and pyridine alkaloid biosynthesis
Vitvi13g00343	PREDICTED: tropinone reductase homolog At5g06060 [Vitis vinifera]	K08081	Tropane, piperidine and pyridine alkaloid biosynthesis
Vitvi10g01779	Trans-resveratrol di-O-methyltransferase [Vitis vinifera]	K22588	Tryptophan metabolism
Vitvi12g02758	Glutathione S-transferase zeta class OS=Euphorbia esula OX=3993 PE=2 SV=1;	K01800	Tyrosine metabolism
Vitvi10g01735	PREDICTED: probable NAD(P)H dehydrogenase (quinone) FQR1-like 1 [Vitis vinifera]	K03809	Ubiquinone and other terpenoid-quinone biosynthesis
Vitvi11g01258	PREDICTED: 4-coumarate--CoA ligase 2 [Vitis vinifera]	nnu;K01904	Ubiquinone and other terpenoid-quinone biosynthesis;Phenylpropanoid biosynthesis
Vitvi11g00924	PREDICTED: cytochrome P450 CYP73A100 [Vitis vinifera]	K00487	Ubiquinone and other terpenoid-quinone biosynthesis;Phenylpropanoid biosynthesis;Flavonoid biosynthesis;Stilbenoid, diarylheptanoid and gingerol biosynthesis
Vitvi11g01045	PREDICTED: cytochrome P450 CYP73A100 [Vitis vinifera]	K00487	Ubiquinone and other terpenoid-quinone biosynthesis;Phenylpropanoid biosynthesis;Flavonoid biosynthesis;Stilbenoid, diarylheptanoid and gingerol biosynthesis
Vitvi10g01764	PREDICTED: probable ubiquitin-conjugating enzyme E2 24 [Vitis vinifera]	K10581	Ubiquitin mediated proteolysis
Vitvi15g00996	PREDICTED: E3 ubiquitin-protein ligase UPL3-like [Nelumbo nucifera]	K10590	Ubiquitin mediated proteolysis
Vitvi17g01398	E3 ubiquitin-protein ligase FANCL [Vitis vinifera]	K10606	Ubiquitin mediated proteolysis
Vitvi06g00811	PREDICTED: ubiquitin-conjugating enzyme E2-17 kDa [Vitis vinifera]	K06689	Ubiquitin mediated proteolysis;Protein processing in endoplasmic reticulum
Vitvi07g02941	E3 ubiquitin-protein ligase CHIP [Vitis vinifera]	K09561	Ubiquitin mediated proteolysis;Protein processing in endoplasmic reticulum
Vitvi07g02944	E3 ubiquitin-protein ligase CHIP [Vitis vinifera]	K09561	Ubiquitin mediated proteolysis;Protein processing in endoplasmic reticulum
Vitvi09g00375	Pyridoxal 5'-phosphate synthase-like subunit PDX1.2 [Vitis vinifera]	K06215	Vitamin B6 metabolism
Vitvi09g01542	PREDICTED: inorganic pyrophosphatase 2 [Vitis vinifera]	K13248	Vitamin B6 metabolism
Vitvi08g01962	PREDICTED: cytokinin dehydrogenase 1 [Vitis vinifera]	K00279	Zeatin biosynthesis
Vitvi11g01371	PREDICTED: cytokinin dehydrogenase 3 [Vitis vinifera]	K00279	Zeatin biosynthesis
Vitvi04g00161	PREDICTED: cytokinin dehydrogenase 7 [Vitis vinifera]	K00279	Zeatin biosynthesis
Vitvi08g01006	PREDICTED: scopoletin glucosyltransferase [Vitis vinifera]	K13496;nnu	Zeatin biosynthesis

## Sheet: Table S7
Table S7. DEGs enriched in KEGG pathways in the comparison of BN vs. AN
Gene ID	Description	KO ID	KEGG Pathway
Vitvi06g00666	Asparagine synthetase [glutamine-hydrolyzing] 1 OS=Arabidopsis thaliana OX=3702 GN=ASN1 PE=2 SV=2;	K01953	Alanine, aspartate and glutamate metabolism
Vitvi07g01108	PREDICTED: putative quinone-oxidoreductase homolog, chloroplastic [Vitis vinifera]	K00224	alpha-Linolenic acid metabolism
Vitvi05g01583	class IV chitinase precursor [Vitis vinifera]	K01183	Amino sugar and nucleotide sugar metabolism
Vitvi05g02251	hypothetical protein VITISV_010460 [Vitis vinifera]	K01183	Amino sugar and nucleotide sugar metabolism
Vitvi07g00376	PREDICTED: cellulose synthase-like protein D5 [Vitis vinifera]	K00770	Amino sugar and nucleotide sugar metabolism
Vitvi05g02249	PREDICTED: chitinase 5 [Vitis vinifera]	K01183	Amino sugar and nucleotide sugar metabolism
Vitvi05g02250	PREDICTED: endochitinase A isoform X1 [Vitis vinifera]	K01183	Amino sugar and nucleotide sugar metabolism
Vitvi05g01575	PREDICTED: endochitinase EP3 [Vitis vinifera]	K01183	Amino sugar and nucleotide sugar metabolism
Vitvi17g00103	PREDICTED: UDP-arabinopyranose mutase 1 isoform X1 [Vitis vinifera]	K13379	Amino sugar and nucleotide sugar metabolism
Vitvi14g01350	PREDICTED: UDP-arabinopyranose mutase 3 [Vitis vinifera]	K13379	Amino sugar and nucleotide sugar metabolism
Vitvi04g01508	chitinase [Vitis vinifera]	K20547	Amino sugar and nucleotide sugar metabolism;MAPK signaling pathway - plant
Vitvi16g01561	NADH glutamate dehydrogenase [Vitis vinifera]	K00261	Arginine biosynthesis;Alanine, aspartate and glutamate metabolism;Nitrogen metabolism
Vitvi15g00894	PREDICTED: probable L-gulonolactone oxidase 6 [Vitis vinifera]	K00103	Ascorbate and aldarate metabolism
Vitvi10g01549	High mobility group B protein 7 [Vitis vinifera]	cic;K10802;K11296;cit	Base excision repair
Vitvi01g01301	PREDICTED: uncharacterized protein LOC100249617 [Vitis vinifera]	K01246	Base excision repair
Vitvi07g00696	PREDICTED: tyrosine decarboxylase 1 [Vitis vinifera]	K01593	Betalain biosynthesis;Indole alkaloid biosynthesis;Isoquinoline alkaloid biosynthesis;Phenylalanine metabolism;Tyrosine metabolism;Tryptophan metabolism
Vitvi05g00963	PREDICTED: 9-cis-epoxycarotenoid dioxygenase NCED6, chloroplastic [Vitis vinifera]	K09840	Carotenoid biosynthesis
Vitvi03g00508	PREDICTED: abscisic acid 8'-hydroxylase 4 [Vitis vinifera]	K09843	Carotenoid biosynthesis
Vitvi08g00223	PREDICTED: prolycopene isomerase, chloroplastic [Vitis vinifera]	K09835	Carotenoid biosynthesis
Vitvi01g00499	PREDICTED: adagio protein 3 [Vitis vinifera]	K12116	Circadian rhythm - plant
Vitvi05g00737	PREDICTED: cryptochrome-1 isoform X1 [Vitis vinifera]	K12119	Circadian rhythm - plant
Vitvi09g00225	PREDICTED: protein EARLY FLOWERING 3 [Vitis vinifera]	K12125	Circadian rhythm - plant
Vitvi10g01391	PREDICTED: stilbene synthase 2 [Vitis vinifera]	K00660	Circadian rhythm - plant;Flavonoid biosynthesis
Vitvi10g01599	PREDICTED: stilbene synthase 2 [Vitis vinifera]	K00660	Circadian rhythm - plant;Flavonoid biosynthesis
Vitvi10g01595	PREDICTED: stilbene synthase 2 [Vitis vinifera]	K00660	Circadian rhythm - plant;Flavonoid biosynthesis
Vitvi10g01392	Stilbene synthase 2 [Vitis vinifera]	K00660	Circadian rhythm - plant;Flavonoid biosynthesis
Vitvi10g01596	PREDICTED: stilbene synthase 2 [Vitis vinifera]	K13232;K00660	Circadian rhythm - plant;Flavonoid biosynthesis;Stilbenoid, diarylheptanoid and gingerol biosynthesis
Vitvi16g00993	PREDICTED: stilbene synthase 2 isoform X1 [Vitis vinifera]	K13232;K00660	Circadian rhythm - plant;Flavonoid biosynthesis;Stilbenoid, diarylheptanoid and gingerol biosynthesis
Vitvi16g01486	PREDICTED: stilbene synthase 3 isoform X1 [Vitis vinifera]	K13232;K00660	Circadian rhythm - plant;Flavonoid biosynthesis;Stilbenoid, diarylheptanoid and gingerol biosynthesis
Vitvi16g01463	PREDICTED: stilbene synthase 4 [Vitis vinifera]	K13232;K00660	Circadian rhythm - plant;Flavonoid biosynthesis;Stilbenoid, diarylheptanoid and gingerol biosynthesis
Vitvi16g00995	PREDICTED: stilbene synthase 4 [Vitis vinifera]	K13232;K00660	Circadian rhythm - plant;Flavonoid biosynthesis;Stilbenoid, diarylheptanoid and gingerol biosynthesis
Vitvi16g01459	PREDICTED: stilbene synthase 4 isoform X1 [Vitis vinifera]	K13232;K00660	Circadian rhythm - plant;Flavonoid biosynthesis;Stilbenoid, diarylheptanoid and gingerol biosynthesis
Vitvi16g01467	PREDICTED: stilbene synthase 4-like [Vitis vinifera]	K13232;K00660	Circadian rhythm - plant;Flavonoid biosynthesis;Stilbenoid, diarylheptanoid and gingerol biosynthesis
Vitvi16g01465	PREDICTED: stilbene synthase 4-like [Vitis vinifera]	K13232;K00660	Circadian rhythm - plant;Flavonoid biosynthesis;Stilbenoid, diarylheptanoid and gingerol biosynthesis
Vitvi16g01462	PREDICTED: stilbene synthase 4-like [Vitis vinifera]	K13232;K00660	Circadian rhythm - plant;Flavonoid biosynthesis;Stilbenoid, diarylheptanoid and gingerol biosynthesis
Vitvi16g01466	PREDICTED: stilbene synthase 4-like [Vitis vinifera]	K13232;K00660	Circadian rhythm - plant;Flavonoid biosynthesis;Stilbenoid, diarylheptanoid and gingerol biosynthesis
Vitvi16g01471	PREDICTED: stilbene synthase 4-like [Vitis vinifera]	K13232;K00660	Circadian rhythm - plant;Flavonoid biosynthesis;Stilbenoid, diarylheptanoid and gingerol biosynthesis
Vitvi16g01460	PREDICTED: stilbene synthase 4-like [Vitis vinifera]	K13232;K00660	Circadian rhythm - plant;Flavonoid biosynthesis;Stilbenoid, diarylheptanoid and gingerol biosynthesis
Vitvi16g01469	PREDICTED: stilbene synthase 4-like [Vitis vinifera]	K13232;K00660	Circadian rhythm - plant;Flavonoid biosynthesis;Stilbenoid, diarylheptanoid and gingerol biosynthesis
Vitvi16g01453	stilbene synthase [Vitis pseudoreticulata]	K13232;K00660	Circadian rhythm - plant;Flavonoid biosynthesis;Stilbenoid, diarylheptanoid and gingerol biosynthesis
Vitvi16g01458	stilbene synthase [Vitis pseudoreticulata]	K13232;K00660	Circadian rhythm - plant;Flavonoid biosynthesis;Stilbenoid, diarylheptanoid and gingerol biosynthesis
Vitvi16g01461	Stilbene synthase 4 [Vitis vinifera]	K13232;K00660	Circadian rhythm - plant;Flavonoid biosynthesis;Stilbenoid, diarylheptanoid and gingerol biosynthesis
Vitvi01g00612	PREDICTED: cytochrome P450 86B1 [Vitis vinifera]	K15402	Cutin, suberine and wax biosynthesis
Vitvi09g00183	PREDICTED: protein HOTHEAD [Vitis vinifera]	K15403	Cutin, suberine and wax biosynthesis
Vitvi06g00605	PREDICTED: cytochrome P450 86A1 [Vitis vinifera]	K15401	Cutin, suberine and wax biosynthesis;Fatty acid degradation
Vitvi07g02198	Beta-glucosidase 11 OS=Arabidopsis thaliana OX=3702 GN=BGLU11 PE=2 SV=2;	K01188	Cyanoamino acid metabolism;Phenylpropanoid biosynthesis;Starch and sucrose metabolism
Vitvi13g02541	Beta-glucosidase 13 OS=Oryza sativa subsp. japonica OX=39947 GN=BGLU13 PE=2 SV=2;	K01188;K22279	Cyanoamino acid metabolism;Phenylpropanoid biosynthesis;Starch and sucrose metabolism
Vitvi11g00195	PREDICTED: 1-aminocyclopropane-1-carboxylate oxidase 1 [Vitis vinifera]	K05933	Cysteine and methionine metabolism
Vitvi06g00102	PREDICTED: DNA (cytosine-5)-methyltransferase CMT3 [Vitis vinifera]	K00558	Cysteine and methionine metabolism
Vitvi01g00286	PREDICTED: homocysteine S-methyltransferase 1 [Vitis vinifera]	K00547	Cysteine and methionine metabolism
Vitvi08g01767	PREDICTED: putative DNA (cytosine-5)-methyltransferase CMT1 [Vitis vinifera]	K00558	Cysteine and methionine metabolism
Vitvi08g00816	PREDICTED: alanine--glyoxylate aminotransferase 2 homolog 2, mitochondrial [Vitis vinifera]	K00827	Cysteine and methionine metabolism;Alanine, aspartate and glutamate metabolism;Valine, leucine and isoleucine degradation;Glycine, serine and threonine metabolism
Vitvi11g00811	PREDICTED: S-adenosylmethionine decarboxylase proenzyme [Vitis vinifera]	K01611	Cysteine and methionine metabolism;Arginine and proline metabolism
Vitvi14g01289	S-adenosylmethionine decarboxylase proenzyme [Vitis vinifera]	K01611	Cysteine and methionine metabolism;Arginine and proline metabolism
Vitvi11g01521	S-adenosylmethionine decarboxylase	K01611	Cysteine and methionine metabolism;Arginine and proline metabolism
Vitvi18g02625	PREDICTED: branched-chain-amino-acid aminotransferase 2, chloroplastic [Vitis vinifera]	K00826	Cysteine and methionine metabolism;Pantothenate and CoA biosynthesis;Valine, leucine and isoleucine degradation;Glucosinolate biosynthesis;Valine, leucine and isoleucine biosynthesis
Vitvi15g00782	gibberellin 20 oxidase 1-D-like [Vitis vinifera]	K05282	Diterpenoid biosynthesis
Vitvi07g01731	PREDICTED: DNA polymerase alpha catalytic subunit [Vitis vinifera]	K02320	DNA replication
Vitvi10g00754	PREDICTED: DNA replication licensing factor MCM3 homolog 2 [Vitis vinifera]	K02541	DNA replication
Vitvi03g00023	PREDICTED: DNA replication licensing factor MCM4 [Vitis vinifera]	K02212	DNA replication
Vitvi04g02296	PREDICTED: IST1-like protein [Vitis vinifera]	K19476	Endocytosis
Vitvi04g02297	PREDICTED: IST1-like protein [Vitis vinifera]	K19476	Endocytosis
Vitvi10g01136	PREDICTED: vacuolar protein sorting-associated protein 2 homolog 2 [Vitis vinifera]	K12191	Endocytosis
Vitvi17g00301	AMSH-like ubiquitin thioesterase 1 OS=Arabidopsis thaliana OX=3702 GN=AMSH1 PE=2 SV=1;	K11866	Endocytosis
Vitvi10g00164	EH domain-containing protein 1 OS=Arabidopsis thaliana OX=3702 GN=EHD1 PE=1 SV=1;	K12483	Endocytosis
Vitvi19g02006	Vacuolar protein sorting-associated protein 22-like 1 [Vitis vinifera]	K12188	Endocytosis
Vitvi06g00443	PREDICTED: heat shock cognate 70 kDa protein 2 [Vitis vinifera]	K03283	Endocytosis;Protein processing in endoplasmic reticulum;Spliceosome
Vitvi11g01098	Phospholipase A2-alpha OS=Arabidopsis thaliana OX=3702 GN=PLA2-ALPHA PE=1 SV=1;	K01047	Ether lipid metabolism;Glycerophospholipid metabolism;alpha-Linolenic acid metabolism;Linoleic acid metabolism;Arachidonic acid metabolism
Vitvi17g01339	PREDICTED: palmitoyl-acyl carrier protein thioesterase, chloroplastic isoform X2 [Vitis vinifera]	K10781	Fatty acid biosynthesis
Vitvi07g03175	Oleoyl-acyl carrier protein thioesterase 2, chloroplastic OS=Arabidopsis thaliana OX=3702 GN=FATA2 PE=2 SV=1;	K10782	Fatty acid biosynthesis
Vitvi18g01231	PREDICTED: stearoyl-[acyl-carrier-protein] 9-desaturase 6, chloroplastic [Vitis vinifera]	K03921	Fatty acid biosynthesis;Biosynthesis of unsaturated fatty acids
Vitvi05g01620	Stearoyl-[acyl-carrier-protein] 9-desaturase, chloroplastic [Vitis vinifera]	K03921	Fatty acid biosynthesis;Biosynthesis of unsaturated fatty acids
Vitvi06g01896	PREDICTED: flavonoid 3',5'-hydroxylase 2 [Vitis vinifera]	K13083	Flavonoid biosynthesis;Flavone and flavonol biosynthesis
Vitvi06g01888	PREDICTED: flavonoid 3',5'-hydroxylase 2 [Vitis vinifera]	K13083	Flavonoid biosynthesis;Flavone and flavonol biosynthesis
Vitvi06g01183	PREDICTED: flavonoid 3',5'-hydroxylase 2-like [Vitis vinifera]	K13083	Flavonoid biosynthesis;Flavone and flavonol biosynthesis
Vitvi11g00720	PREDICTED: shikimate O-hydroxycinnamoyltransferase isoform X1 [Vitis vinifera]	K13065	Flavonoid biosynthesis;Phenylpropanoid biosynthesis;Stilbenoid, diarylheptanoid and gingerol biosynthesis
Vitvi01g01514	PREDICTED: vinorine synthase [Vitis vinifera]	K13065	Flavonoid biosynthesis;Phenylpropanoid biosynthesis;Stilbenoid, diarylheptanoid and gingerol biosynthesis
Vitvi01g00714	PREDICTED: galactinol synthase 1 [Vitis vinifera]	K18819	Galactose metabolism
Vitvi14g02461	PREDICTED: galactinol synthase 2 [Vitis vinifera]	K18819	Galactose metabolism
Vitvi07g00431	PREDICTED: stachyose synthase [Vitis vinifera]	K06611	Galactose metabolism
Vitvi07g00286	Glutathione S-transferase [Vitis vinifera]	K00799	Glutathione metabolism
Vitvi19g01338	PREDICTED: probable glutathione S-transferase parA [Vitis vinifera]	K00799	Glutathione metabolism
Vitvi15g01730	putative glutathione S-transferase [Vitis vinifera]	K00799	Glutathione metabolism
Vitvi13g00241	hypothetical protein VITISV_000080 [Vitis vinifera]	K21888	Glutathione metabolism;Ascorbate and aldarate metabolism
Vitvi01g00443	PREDICTED: phosphomethylethanolamine N-methyltransferase isoform X1 [Vitis vinifera]	K05929	Glycerophospholipid metabolism
Vitvi14g01684	PREDICTED: putative glucose-6-phosphate 1-epimerase [Vitis vinifera]	K01792	Glycolysis / Gluconeogenesis
Vitvi08g01301	PREDICTED: fructose-1,6-bisphosphatase, chloroplastic [Vitis vinifera]	K03841	Glycolysis / Gluconeogenesis;Pentose phosphate pathway;Fructose and mannose metabolism;Carbon fixation in photosynthetic organisms
Vitvi06g01261	PREDICTED: serine--glyoxylate aminotransferase [Vitis vinifera]	K00830	Glyoxylate and dicarboxylate metabolism;Alanine, aspartate and glutamate metabolism;Glycine, serine and threonine metabolism;Peroxisome
Vitvi19g01352	PREDICTED: peroxisomal (S)-2-hydroxy-acid oxidase GLO1 isoform X1 [Vitis vinifera]	K11517	Glyoxylate and dicarboxylate metabolism;Peroxisome
Vitvi11g00017	PREDICTED: DNA repair protein RAD51 homolog [Vitis vinifera]	K04482	Homologous recombination
Vitvi07g01658	hypothetical protein VITISV_029031 [Vitis vinifera]	K13260	Isoflavonoid biosynthesis
Vitvi10g02336	Polyphenol oxidase, chloroplastic [Vitis vinifera]	K00422	Isoquinoline alkaloid biosynthesis;Tyrosine metabolism
Vitvi10g02337	PREDICTED: LOW QUALITY PROTEIN: polyphenol oxidase, chloroplastic [Vitis vinifera]	K00422	Isoquinoline alkaloid biosynthesis;Tyrosine metabolism
Vitvi10g00442	Polyphenol oxidase, chloroplastic OS=Vitis vinifera OX=29760 PE=1 SV=1;	K00422	Isoquinoline alkaloid biosynthesis;Tyrosine metabolism
Vitvi11g00012	Alpha-aminoadipic semialdehyde synthase OS=Arabidopsis thaliana OX=3702 GN=LKR/SDH PE=1 SV=1;	K14157	Lysine degradation
Vitvi14g00248	PREDICTED: mitogen-activated protein kinase kinase kinase NPK1 isoform X1 [Vitis vinifera]	K20606	MAPK signaling pathway - plant
Vitvi05g00444	Mitogen-activated protein kinase kinase kinase NPK1 OS=Nicotiana tabacum OX=4097 GN=NPK1 PE=1 SV=1;	K20606	MAPK signaling pathway - plant
Vitvi03g00752	hypothetical protein VITISV_021166 [Vitis vinifera]	K13449	MAPK signaling pathway - plant;Plant-pathogen interaction;Plant hormone signal transduction
Vitvi03g00757	pathogenesis-related protein 1-like [Ziziphus jujuba]	K13449	MAPK signaling pathway - plant;Plant-pathogen interaction;Plant hormone signal transduction
Vitvi17g00720	PREDICTED: replication protein A 70 kDa DNA-binding subunit B [Vitis vinifera]	K07466;sind	Mismatch repair;Homologous recombination;Nucleotide excision repair;DNA replication
Vitvi13g00917	Replication protein A 14 kDa subunit A OS=Arabidopsis thaliana OX=3702 GN=RPA3A PE=3 SV=1;	K10740	Mismatch repair;Homologous recombination;Nucleotide excision repair;DNA replication
Vitvi11g01208	PREDICTED: plasma membrane ATPase 4 [Vitis vinifera]	K01535;cit	Oxidative phosphorylation
Vitvi09g02103	putative NADH-ubiquinone oxidoreductase chain 4L/K (plastid) [Helianthus annuus]	K05576	Oxidative phosphorylation
Vitvi14g01635	pectate lyase precursor [Vitis vinifera]	K01728	Pentose and glucuronate interconversions
Vitvi08g01606	pectate lyase-like protein 3 precursor [Vitis vinifera]	K01728	Pentose and glucuronate interconversions
Vitvi12g02137	pectin methylesterase PME1 precursor [Vitis vinifera]	K01051	Pentose and glucuronate interconversions
Vitvi15g00704	Pectinesterase 2 [Vitis vinifera]	K01051	Pentose and glucuronate interconversions
Vitvi11g00031	Pectinesterase 3 [Vitis vinifera]	K01051	Pentose and glucuronate interconversions
Vitvi16g00717	PREDICTED: pectinesterase 2 [Vitis vinifera]	K01051	Pentose and glucuronate interconversions
Vitvi06g01156	PREDICTED: pectinesterase 2 [Vitis vinifera]	K01051	Pentose and glucuronate interconversions
Vitvi14g03086	PREDICTED: pectinesterase 2 [Vitis vinifera]	K01051	Pentose and glucuronate interconversions
Vitvi08g02376	PREDICTED: polygalacturonase [Vitis vinifera]	K01184	Pentose and glucuronate interconversions
Vitvi07g00787	PREDICTED: probable pectate lyase 8 [Vitis vinifera]	K01728	Pentose and glucuronate interconversions
Vitvi07g00350	PREDICTED: probable pectinesterase/pectinesterase inhibitor 7 [Vitis vinifera]	K01051	Pentose and glucuronate interconversions
Vitvi14g01745	Polygalacturonase At1g48100 OS=Arabidopsis thaliana OX=3702 GN=At1g48100 PE=2 SV=1;	K01184	Pentose and glucuronate interconversions
Vitvi16g00280	PREDICTED: superoxide dismutase [Fe], chloroplastic [Vitis vinifera]	K04564	Peroxisome
Vitvi06g01456	PREDICTED: fatty acyl-CoA reductase 3 [Vitis vinifera]	K13356	Peroxisome;Cutin, suberine and wax biosynthesis
Vitvi14g01929	PREDICTED: tubulin alpha chain [Vitis vinifera]	K07374	Phagosome
Vitvi06g00569	PREDICTED: tubulin beta-2 chain [Vitis vinifera]	K07375	Phagosome
Vitvi11g00309	PREDICTED: rac-like GTP-binding protein ARAC7 isoform X1 [Vitis vinifera]	K04392	Phagosome;AGE-RAGE signaling pathway in diabetic complications
Vitvi17g00047	PREDICTED: V-type proton ATPase subunit C isoform X1 [Vitis vinifera]	K02148	Phagosome;Oxidative phosphorylation
Vitvi13g02194	V-type proton ATPase subunit a1 OS=Arabidopsis thaliana OX=3702 GN=VHA-a1 PE=2 SV=1;	K02154	Phagosome;Oxidative phosphorylation
Vitvi13g01899	PREDICTED: arogenate dehydrogenase 1, chloroplastic isoform X1 [Vitis vinifera]	K15227	Phenylalanine, tyrosine and tryptophan biosynthesis
Vitvi05g00235	1-Cys peroxiredoxin [Vitis vinifera]	K11188	Phenylpropanoid biosynthesis
Vitvi12g00153	PREDICTED: berberine bridge enzyme-like 13 [Vitis vinifera]	K22395	Phenylpropanoid biosynthesis
Vitvi11g01438	PREDICTED: peroxidase 25-like [Vitis vinifera]	K00430	Phenylpropanoid biosynthesis
Vitvi05g00135	PREDICTED: peroxidase 29 [Vitis vinifera]	K00430	Phenylpropanoid biosynthesis
Vitvi18g00190	PREDICTED: peroxidase 64 [Vitis vinifera]	K00430	Phenylpropanoid biosynthesis
Vitvi04g02306	PREDICTED: peroxidase 64 [Vitis vinifera]	K00430	Phenylpropanoid biosynthesis
Vitvi04g02188	PREDICTED: peroxidase 64, partial [Vitis vinifera]	K00430	Phenylpropanoid biosynthesis
Vitvi12g01598	PREDICTED: peroxidase N1 [Vitis vinifera]	K00430	Phenylpropanoid biosynthesis
Vitvi01g01473	Lignin-forming anionic peroxidase OS=Nicotiana sylvestris OX=4096 PE=2 SV=1;	K00430	Phenylpropanoid biosynthesis
Vitvi16g01502	phenylalanine ammonia-lyase [Vitis vinifera]	K10775	Phenylpropanoid biosynthesis;Phenylalanine metabolism
Vitvi16g00057	PREDICTED: phenylalanine ammonia-lyase [Vitis vinifera]	K10775	Phenylpropanoid biosynthesis;Phenylalanine metabolism
Vitvi00g01431	PREDICTED: phenylalanine ammonia-lyase-like [Vitis vinifera]	K10775	Phenylpropanoid biosynthesis;Phenylalanine metabolism
Vitvi16g01503	PREDICTED: phenylalanine ammonia-lyase-like [Vitis vinifera]	K10775	Phenylpropanoid biosynthesis;Phenylalanine metabolism
Vitvi16g00097	PREDICTED: inositol-tetrakisphosphate 1-kinase 1 [Vitis vinifera]	K00913	Phosphatidylinositol signaling system;Inositol phosphate metabolism
Vitvi07g01686	PREDICTED: phosphatidylinositol 3,4,5-trisphosphate 3-phosphatase and protein-tyrosine-phosphatase PTEN2A [Vitis vinifera]	K01110	Phosphatidylinositol signaling system;Inositol phosphate metabolism
Vitvi04g02063	PREDICTED: photosystem I reaction center subunit XI, chloroplastic [Vitis vinifera]	K02699	Photosynthesis
Vitvi06g01531	PREDICTED: photosystem I subunit O [Vitis vinifera]	K14332	Photosynthesis
Vitvi14g00489	PREDICTED: photosystem II reaction center W protein, chloroplastic [Vitis vinifera]	K02721	Photosynthesis
Vitvi17g00615	PREDICTED: chlorophyll a-b binding protein 4, chloroplastic [Vitis vinifera]	K08910	Photosynthesis - antenna proteins
Vitvi18g00031	PREDICTED: chlorophyll a-b binding protein 5, chloroplastic isoform X1 [Vitis vinifera]	K14172	Photosynthesis - antenna proteins
Vitvi18g02408	PREDICTED: chlorophyll a-b binding protein CP26, chloroplastic [Vitis vinifera]	K08916	Photosynthesis - antenna proteins
Vitvi10g00740	PREDICTED: chlorophyll a-b binding protein of LHCII type 1 [Vitis vinifera]	K08912	Photosynthesis - antenna proteins
Vitvi03g00122	PREDICTED: auxin transporter-like protein 2 [Vitis vinifera]	K13946	Plant hormone signal transduction
Vitvi18g00310	PREDICTED: auxin transporter-like protein 3 [Vitis vinifera]	K13946	Plant hormone signal transduction
Vitvi03g01337	PREDICTED: auxin-induced protein 6B-like [Vitis vinifera]	K14488	Plant hormone signal transduction
Vitvi02g00507	PREDICTED: auxin-responsive protein SAUR36 [Vitis vinifera]	K14488	Plant hormone signal transduction
Vitvi18g02690	PREDICTED: BRI1 kinase inhibitor 1 [Vitis vinifera]	K14499	Plant hormone signal transduction
Vitvi18g00731	PREDICTED: cyclin-D3-1 [Vitis vinifera]	K14505	Plant hormone signal transduction
Vitvi01g02293	PREDICTED: protein TIFY 9 [Vitis vinifera]	K13464	Plant hormone signal transduction
Vitvi01g00344	PREDICTED: two-component response regulator-like PRR95 isoform X1 [Vitis vinifera]	K14491;cit	Plant hormone signal transduction
Vitvi01g00260	Transcription factor PERIANTHIA OS=Arabidopsis thaliana OX=3702 GN=PAN PE=1 SV=1;	K14431	Plant hormone signal transduction
Vitvi17g00732	Two-component response regulator ARR6 OS=Arabidopsis thaliana OX=3702 GN=ARR6 PE=1 SV=2;	K14492	Plant hormone signal transduction
Vitvi18g02779	Cysteine protease RD19A [Vitis vinifera]	K01373	Plant-pathogen interaction
Vitvi13g01130	PREDICTED: calcium and calcium/calmodulin-dependent serine/threonine-protein kinase [Vitis vinifera]	K13412	Plant-pathogen interaction
Vitvi05g01500	PREDICTED: calmodulin-like protein 3 [Vitis vinifera]	K13448	Plant-pathogen interaction
Vitvi11g00250	PREDICTED: mitogen-activated protein kinase kinase 6 [Vitis vinifera]	K04368	Plant-pathogen interaction
Vitvi18g00905	PREDICTED: probable calcium-binding protein CML41 [Vitis vinifera]	K13448	Plant-pathogen interaction
Vitvi12g00195	Calcium-dependent protein kinase 30 OS=Arabidopsis thaliana OX=3702 GN=CPK30 PE=1 SV=1;	K13412	Plant-pathogen interaction
Vitvi02g00025	PREDICTED: heat shock protein 83 [Vitis vinifera]	K04079	Plant-pathogen interaction;Protein processing in endoplasmic reticulum
Vitvi16g01103	PREDICTED: heat shock protein 83 [Vitis vinifera]	K04079	Plant-pathogen interaction;Protein processing in endoplasmic reticulum
Vitvi12g00683	PREDICTED: heat shock protein 90-6, mitochondrial isoform X2 [Vitis vinifera]	K09487	Plant-pathogen interaction;Protein processing in endoplasmic reticulum
Vitvi07g02120	PREDICTED: chlorophyllase-1 [Vitis vinifera]	K08099	Porphyrin and chlorophyll metabolism
Vitvi07g02115	PREDICTED: chlorophyllase-1 [Vitis vinifera]	K08099	Porphyrin and chlorophyll metabolism
Vitvi12g00346	PREDICTED: protochlorophyllide reductase [Vitis vinifera]	K00218	Porphyrin and chlorophyll metabolism
Vitvi13g01779	PREDICTED: uncharacterized protein LOC100852901 [Vitis vinifera]	K02303	Porphyrin and chlorophyll metabolism
Vitvi04g01792	hypothetical protein VITISV_012137 [Vitis vinifera]	K13993	Protein processing in endoplasmic reticulum
Vitvi09g00045	hypothetical protein VITISV_015797 [Vitis vinifera]	K13993	Protein processing in endoplasmic reticulum
Vitvi13g00278	PREDICTED: 15.7 kDa heat shock protein, peroxisomal [Vitis vinifera]	K13993	Protein processing in endoplasmic reticulum
Vitvi04g01795	PREDICTED: 17.1 kDa class II heat shock protein [Vitis vinifera]	K13993	Protein processing in endoplasmic reticulum
Vitvi04g01801	PREDICTED: 17.3 kDa class II heat shock protein [Vitis vinifera]	K13993	Protein processing in endoplasmic reticulum
Vitvi04g01799	PREDICTED: 17.3 kDa class II heat shock protein [Vitis vinifera]	K13993	Protein processing in endoplasmic reticulum
Vitvi04g00135	PREDICTED: 17.3 kDa class II heat shock protein [Vitis vinifera]	K13993	Protein processing in endoplasmic reticulum
Vitvi04g01800	PREDICTED: 17.3 kDa class II heat shock protein-like [Vitis vinifera]	K13993	Protein processing in endoplasmic reticulum
Vitvi19g01760	PREDICTED: 17.8 kDa class I heat shock protein [Vitis vinifera]	K13993	Protein processing in endoplasmic reticulum
Vitvi04g01797	PREDICTED: 17.9 kDa class II heat shock protein-like [Vitis vinifera]	K13993	Protein processing in endoplasmic reticulum
Vitvi13g00491	PREDICTED: 18.1 kDa class I heat shock protein [Vitis vinifera]	K13993	Protein processing in endoplasmic reticulum
Vitvi13g00409	PREDICTED: 18.2 kDa class I heat shock protein [Vitis vinifera]	K13993	Protein processing in endoplasmic reticulum
Vitvi13g00405	PREDICTED: 18.2 kDa class I heat shock protein [Vitis vinifera]	K13993	Protein processing in endoplasmic reticulum
Vitvi13g00410	PREDICTED: 18.2 kDa class I heat shock protein [Vitis vinifera]	K13993	Protein processing in endoplasmic reticulum
Vitvi16g00681	PREDICTED: 23.6 kDa heat shock protein, mitochondrial [Vitis vinifera]	K13993	Protein processing in endoplasmic reticulum
Vitvi02g01447	PREDICTED: small heat shock protein, chloroplastic [Vitis vinifera]	K13993	Protein processing in endoplasmic reticulum
Vitvi02g01832	hypothetical protein VITISV_016996 [Vitis vinifera]	K00759	Purine metabolism
Vitvi01g00103	Allantoate deiminase 2 OS=Glycine max OX=3847 GN=AAH2 PE=1 SV=1;	K02083	Purine metabolism
Vitvi06g01166	PREDICTED: deoxyuridine 5'-triphosphate nucleotidohydrolase [Vitis vinifera]	K01520	Pyrimidine metabolism
Vitvi01g01357	PREDICTED: uridine-cytidine kinase C isoform X1 [Vitis vinifera]	K00876	Pyrimidine metabolism
Vitvi14g01542	PREDICTED: ribonucleoside-diphosphate reductase small chain [Vitis vinifera]	K10808	Pyrimidine metabolism;Glutathione metabolism;Purine metabolism
Vitvi12g00189	PREDICTED: bifunctional riboflavin kinase/FMN phosphatase isoform X1 [Vitis vinifera]	K20884	Riboflavin metabolism
Vitvi05g00924	PREDICTED: chaperonin CPN60-2, mitochondrial [Vitis vinifera]	K04077	RNA degradation
Vitvi18g02298	PREDICTED: valencene synthase [Vitis vinifera]	K15803	Sesquiterpenoid and triterpenoid biosynthesis
Vitvi11g00878	Lupeol synthase OS=Betula platyphylla OX=78630 GN=OSCBPW PE=1 SV=1;	K20659	Sesquiterpenoid and triterpenoid biosynthesis
Vitvi18g02461	Valencene synthase [Vitis vinifera]	K15803	Sesquiterpenoid and triterpenoid biosynthesis
Vitvi18g02449	valencene synthase-like [Vitis vinifera]	K15803	Sesquiterpenoid and triterpenoid biosynthesis
Vitvi07g03091	PREDICTED: squalene epoxidase 3 [Vitis vinifera]	K00511	Sesquiterpenoid and triterpenoid biosynthesis;Steroid biosynthesis
Vitvi03g00779	PREDICTED: squalene monooxygenase [Vitis vinifera]	K00511	Sesquiterpenoid and triterpenoid biosynthesis;Steroid biosynthesis
Vitvi03g00311	PREDICTED: syntaxin-112 [Vitis vinifera]	K08486	SNARE interactions in vesicular transport
Vitvi04g00242	PREDICTED: syntaxin-related protein KNOLLE [Vitis vinifera]	K08486	SNARE interactions in vesicular transport
Vitvi08g01112	PREDICTED: ABC transporter G family member 20 [Vitis vinifera]	K12896	Spliceosome
Vitvi02g00605	PREDICTED: beta-amylase 3, chloroplastic [Vitis vinifera]	K01177	Starch and sucrose metabolism
Vitvi07g00352	PREDICTED: endoglucanase 17 [Vitis vinifera]	K01179	Starch and sucrose metabolism
Vitvi18g02345	PREDICTED: endoglucanase 3 [Vitis vinifera]	K01179	Starch and sucrose metabolism
Vitvi14g00821	PREDICTED: glucan endo-1,3-beta-glucosidase 2 [Vitis vinifera]	K19891	Starch and sucrose metabolism
Vitvi19g00678	PREDICTED: inactive beta-amylase 4, chloroplastic [Vitis vinifera]	K01177	Starch and sucrose metabolism
Vitvi09g00193	Beta-fructofuranosidase, insoluble isoenzyme CWINV1 [Vitis vinifera]	K01193	Starch and sucrose metabolism;Galactose metabolism
Vitvi12g02272	PREDICTED: trans-resveratrol di-O-methyltransferase [Vitis vinifera]	K16040	Stilbenoid, diarylheptanoid and gingerol biosynthesis
Vitvi12g02277	PREDICTED: trans-resveratrol di-O-methyltransferase [Vitis vinifera]	K16040	Stilbenoid, diarylheptanoid and gingerol biosynthesis
Vitvi12g02273	PREDICTED: trans-resveratrol di-O-methyltransferase-like [Vitis vinifera]	K16040	Stilbenoid, diarylheptanoid and gingerol biosynthesis
Vitvi08g00117	PREDICTED: plant cysteine oxidase 2 [Vitis vinifera]	K10712;K23953	Taurine and hypotaurine metabolism
Vitvi17g00554	Plant cysteine oxidase 2 OS=Arabidopsis thaliana OX=3702 GN=PCO2 PE=1 SV=1;	K10712;K23953	Taurine and hypotaurine metabolism
Vitvi12g02758	Glutathione S-transferase zeta class OS=Euphorbia esula OX=3993 PE=2 SV=1;	K01800	Tyrosine metabolism
Vitvi11g01258	PREDICTED: 4-coumarate--CoA ligase 2 [Vitis vinifera]	nnu;K01904	Ubiquinone and other terpenoid-quinone biosynthesis;Phenylpropanoid biosynthesis
Vitvi11g01045	PREDICTED: cytochrome P450 CYP73A100 [Vitis vinifera]	K00487	Ubiquinone and other terpenoid-quinone biosynthesis;Phenylpropanoid biosynthesis;Flavonoid biosynthesis;Stilbenoid, diarylheptanoid and gingerol biosynthesis
Vitvi11g01568	Anaphase-promoting complex subunit 8 [Vitis vinifera]	K03355	Ubiquitin mediated proteolysis
Vitvi15g00248	Cell division cycle 20.1, cofactor of APC complex [Vitis vinifera]	K03363	Ubiquitin mediated proteolysis
Vitvi10g01764	PREDICTED: probable ubiquitin-conjugating enzyme E2 24 [Vitis vinifera]	K10581	Ubiquitin mediated proteolysis
Vitvi06g01275	PREDICTED: ubiquitin-conjugating enzyme E2 20 [Vitis vinifera]	K06688	Ubiquitin mediated proteolysis
Vitvi13g00316	Protein FIZZY-related 3 [Vitis vinifera]	K03364	Ubiquitin mediated proteolysis
Vitvi08g01962	PREDICTED: cytokinin dehydrogenase 1 [Vitis vinifera]	K00279	Zeatin biosynthesis

## Sheet: Table S8
Table S8. Differentially expressed genes related to stress response in organelles and plant hormone signal transduction and molecular chaperone functions (FDR ≤ 0.05 and log2 |FC| > 2).
Gene id	KO ID	Gene symbol	FPKM							Function annotation
			BN		PN		AN
			BN_1	BN_3	PN_2	PN_3	AN_1	AN_2	AN_3
mitochondria stresss
Vitvi07g00286	K00799	GST	63.26	75.23	292.58	286.22	123.1	198.09	146.92	Glutathione S-transferase
Vitvi07g00285	K00799	GST	40.05	40.4	93.52	97.73				Glutathione S-transferase
Vitvi17g01381	K00799	GST	1.03	2.65	6.89	3.67				Glutathione S-transferase
Vitvi05g01959	K00799	GST	9.95	24.7	74.08	82.46				Glutathione S-transferase
Vitvi19g01326	K00799	GST	124.83	115.55	337.98	358.32				Glutathione S-transferase
Vitvi19g02374	K00799	GST	1.19	5.58	18.62	25.84				Glutathione S-transferase
Vitvi07g00736	K00799	GST	16.87	18	37.99	36.54				Glutathione S-transferase
Vitvi19g02192	K00799	GST	27.45	61.93	360.85	301.86				Glutathione S-transferase
Vitvi19g02150	K00799	GST	10.07	27.97	164.99	128.96				Glutathione S-transferase
Vitvi19g01048	K00799	GST	5.27	3.73	16.36	10.31				Glutathione S-transferase
Vitvi13g00241	K21888	DHAR	61.38	70.58	186.7	212.14	147.13	130.95	146.63	Glutathione S-transferase DHAR2
Vitvi08g01129	K00799	GST	41.07	62.16	117.24	103.56				Glutathione S-transferase L3
Vitvi19g02189	K00799	GST	5.68	15.51	106.65	100.79				Glutathione S-transferase parC
Vitvi19g01021	K00799	GST	6.07	8.53	53.02	44.85				Glutathione S-transferase U25-like
Vitvi06g01727	K00799	GST	2.91	18.82	76.25	83.74				Glutathione S-transferase U8
Vitvi08g02226	K00799	GST	175.07	266.83	587.91	554.16				Glutathione S-transferase U8
Vitvi08g02227	K00799	GST	99.45	165.73	307.71	292.5				Glutathione S-transferase U8
Vitvi05g01963	K00799	GST	6.41	10.12	17.74	15.49				Glutathione transferase GST 23
Vitvi08g00957	K00799	GST	2.74	2.91	11.04	5.17				Glutathione transferase GST 23
Vitvi05g01961	K00799	GST	14.52	19.43	39.79	42.89				Glutathione transferase GST 23
Vitvi05g01962	K00799	GST	5.95	8.49	30.85	30.71				Glutathione transferase GST 23
Vitvi03g01780	K00434	APX	16.44	31.15	72.33	84.24				L-ascorbate peroxidase
Vitvi06g00358	K00434	APX	634.05	686.17	1630.19	1687.45				L-ascorbate peroxidase 2, cytosolic
Chloroplasts stress
Vitvi10g00740	K08912	LHCB1	53.9	48.44	100.46	132.45	156.2	114.69	128.89	Chlorophyll a-b binding protein of LHCII type 1
Vitvi17g00615	K08910	LHCA4	96.48	80.45	181.34	217.18	279.66	204.39	233.6	Chlorophyll a-b binding protein 4, chloroplastic
Vitvi13g00590	K08907	LHCA1	124.62	108.81	236.65	256.98				Chlorophyll a-b binding protein 6, chloroplastic
Vitvi18g02408	K08916	LHCB5	98.74	80.9	200.97	231.14	283.28	213.73	217.59	Chlorophyll a-b binding protein CP26, chloroplastic
Endoplasmic reticulum stress
Vitvi13g00278	K13993	HSP20	5.89	2.96	48.39	43.43	13.41	14.73	31.49	15.7 kDa heat shock protein, peroxisomal
Vitvi04g01795	K13993	HSP20	2.47	2.24	46	31.91	6.94	5.37	9.24	17.1 kDa class II heat shock protein
Vitvi04g01794	K13993	HSP20	0.44	0	42	23.22				17.1 kDa class II heat shock protein
Vitvi04g01792	K13993	HSP20	21.57	23.61	839.11	784.76	99.68	79.62	128.4	17.3 kDa class II heat shock protein
Vitvi04g01796	K13993	HSP20	0.34	0.74	15.39	9.4				17.3 kDa class II heat shock protein
Vitvi04g01801	K13993	HSP20	0.59	0.65	104.8	68.86	6.58	9.53	11.35	17.3 kDa class II heat shock protein
Vitvi04g01802	K13993	HSP20	0.57	3.52	38.91	31.59				17.3 kDa class II heat shock protein
Vitvi04g01799	K13993	HSP20	3.32	3.83	125.55	99.8	11.7	11.42	18.18	17.3 kDa class II heat shock protein
Vitvi04g00135	K13993	HSP20	6.32	6.11	135.58	109.48	18.38	18.45	43.5	17.3 kDa class II heat shock protein
Vitvi04g01800	K13993	HSP20	6.62	3.66	201.95	146.01	27.75	23.83	33.24	17.3 kDa class II heat shock protein
Vitvi09g00045	K13993	HSP20	35.93	47.54	342.55	260.81	88.35	77.98	112.2	17.4 kDa class III heat shock protein
Vitvi19g01760	K13993	HSP20	0.4	0.88	29.53	16.84	3.63	3.14	8.57	17.8 kDa class I heat shock protein
Vitvi04g01797	K13993	HSP20	1.53	2.09	8.29	11.15	7.27	5.4	7.51	17.9 kDa class II heat shock protein-like
Vitvi13g02024	K13993	HSP20	353.96	337.62	1189.26	1016.68				18.1 kDa class I heat shock protein
Vitvi13g00491	K13993	HSP20	209.29	225.18	1360.53	1485.73	641.45	594.15	675.21	18.1 kDa class I heat shock protein
Vitvi13g00471	K13993	HSP20	3.46	1.85	20.38	16.03				18.1 kDa class I heat shock protein
Vitvi13g00490	K13993	HSP20	7.99	4.29	43.62	33.31				18.1 kDa class I heat shock protein
Vitvi13g00451	K13993	HSP20	92.76	68.66	323.01	273.41				18.1 kDa class I heat shock protein
Vitvi13g02016	K13993	HSP20	1.53	1.72	10.63	11.04				18.2 kDa class I heat shock protein
Vitvi13g00409	K13993	HSP20	54.41	69.01	950.08	693.1	150.78	152.54	272.11	18.2 kDa class I heat shock protein
Vitvi13g02014	K13993	HSP20	0.74	1.21	23.47	14.05				18.2 kDa class I heat shock protein
Vitvi13g00405	K13993	HSP20	4.11	4.24	47	31.26	7.66	7.98	17.53	18.2 kDa class I heat shock protein
Vitvi13g00410	K13993	HSP20	10.88	12.92	231.98	188.56	33.67	26.98	68.11	18.2 kDa class I heat shock protein
Vitvi13g02017	K13993	HSP20	10.96	14.68	106.67	73.6				18.2 kDa class I heat shock protein
Vitvi12g02138	K13993	HSP20	4.17	7.03	116.16	82.58				22.0 kDa class IV heat shock protein
Vitvi18g02423	K13993	HSP20	36.57	48.52	145.38	121.31				22.0 kDa class IV heat shock protein
Vitvi02g01446	K13993	HSP20	3.87	10.57	232.76	154.2				23.6 kDa heat shock protein, mitochondrial
Vitvi16g00681	K13993	HSP20	76.16	83.75	690.87	571.58	145.43	196.14	187.32	23.6 kDa heat shock protein, mitochondrial
Vitvi05g01545	K08057	CALR	17.23	14	31.33	34.59				Calreticulin-3
Vitvi04g01198	K08057	CALR	120.6	90.27	294.91	270.65				Calreticulin-3
Vitvi04g00039	K13989	DERL2_3	12.77	14.39	31.12	30.46				Derlin-1
Vitvi07g00394	K09517	DNAJB11	55.38	48.86	121.75	105.07				DnaJ protein ERDJ3B
Vitvi06g01562	K09503	DNAJA2	128.58	132.1	289.85	263.03				DnaJ protein homolog
Vitvi04g01231	K12670	WBP1	15.53	18.29	34.09	32.25				Dolichyl-diphosphooligosaccharide--protein glycosyltransferase 48 kDa subunit isoform X3
Vitvi07g02944	K09561	CHIP	12.26	16.63	29.01	31.93				E3 ubiquitin-protein ligase CHIP
Vitvi07g02941	K09561	CHIP	32.84	29.5	67.43	66.16				E3 ubiquitin-protein ligase CHIP
Vitvi05g01493	K16196	EIF2AK4	8.86	7.71	3.73	4.28				EIF-2-alpha kinase GCN2 isoform X1
Vitvi18g01133	K09487	HSP90B	112.19	108.52	302.33	251.76				Endoplasmin homolog
Vitvi11g00724	K03283	HSP70	69.19	79.51	258.74	239.93				Heat shock 70 kDa protein
Vitvi06g00443	K03283	HSP70	52.17	55.58	462.79	428.54	130.75	154.62	159.36	Heat shock cognate 70 kDa protein 2
Vitvi08g02189	K03283	HSP70	83.58	91.36	422.19	363.39				Heat shock cognate 70 kDa protein 2
Vitvi10g00217	K04079	HSP90A	215.52	237.1	552.4	562.04				Heat shock cognate protein 80
Vitvi10g02403	K04079	HSP90A	79.42	76.27	241.28	251.24				Heat shock cognate protein 80
Vitvi01g01512	K13993	HSP20	11.09	11.73	80.25	57.94				Heat shock protein 21, chloroplastic
Vitvi02g00025	K04079	HSP90A	10.03	11.02	494.51	381.03	38.88	81.18	74.43	Heat shock protein 83
Vitvi16g01103	K04079	HSP90A	1.39	2.06	51.22	38.53	9.51	10.97	14.87	Heat shock protein 83
Vitvi12g00683	K09487	HSP90B	16.37	21	61.8	63.37	32.14	51.71	39.56	Heat shock protein 90-6, mitochondrial isoform X2
Vitvi08g01234	K09562	HSPBP1	35.35	34.1	97.33	83.54				Hsp70-binding protein 1
Vitvi02g00187	K09490	BIP	166.08	156.76	425.61	370.29				Luminal-binding protein 5
Vitvi11g00967	K10956	SEC61A	29.84	26.36	10.84	13.47				Preprotein translocase subunit SCY1, chloroplastic isoform X1
Vitvi12g00453	K09584	PDIA6	47.11	47.64	101.21	87.71				Protein disulfide isomerase-like 2-3
Vitvi02g01447	K13993	HSP20	0.21	0.2	18.28	14.55	1.43	2.77	3.51	Small heat shock protein, chloroplastic
Vitvi16g01352	K13993	HSP20	5.33	7.14	20.76	16.88				Small heat shock protein, chloroplastic
Vitvi18g02066	K03283	HSP70	29.98	26.35	55.91	59.9				Stromal 70 kDa heat shock-related protein, chloroplastic
Vitvi06g00811	K06689	UBE2D	156.21	144.37	340.57	309.68				Ubiquitin-conjugating enzyme E2-17 kDa
Molecular chaperone
Vitvi01g00424	K04078	HSPE1	11.44	14.31	98.61	93.16	26.49	50.54	35.2	Heat shock 10 kDa protein, chaperonin 10
Vitvi08g01757	------	------	24.78	25.27	68.75	65.95				activator of 90 kDa heat shock protein ATPase homolog
Vitvi09g01808	------	------	66.84	80.43	223.5	198.69				Activator of 90 kDa heat shock protein ATPase homolog 1
Vitvi01g01708	------	------	7.47	10.13	45.19	36.21				BAG family molecular chaperone regulator 5, mitochondrial
Vitvi15g01034	------	------	65.19	62.21	180.31	186.37	171.63	171.92	248.33	BAG family molecular chaperone regulator 6 isoform X1
Vitvi17g00695	K03695	clpB	46.04	54.32	234.37	197.97	94.77	94.53	139.19	Chaperone protein ClpB1
Vitvi04g00522	K03695	clpB	6.48	7.1	16.76	15.84				Chaperone protein ClpB4, mitochondrial
Vitvi18g00501	------	------	3.96	3.26	9.97	9.68				Chaperone protein DnaJ
Vitvi19g02002	------	------	14.69	11.83	5.3	6.14				Chaperone protein dnaJ C76, chloroplastic
Vitvi13g01107	------	------	26.62	29.97	240.41	232.03	78.84	77.12	101.29	Co-chaperone protein p23-1
Vitvi07g02194	K19765	HSBP1	14.87	16.22	23.95	23.46	46.77	33.74	37.58	Heat shock factor-binding protein
Plant hormone signal transduction
Vitvi17g00732	K14492	ARR-A	6.18	8.58	28.95	29.14	12.88	30.08	12.64	Two-component response regulator ARR6
Vitvi01g00344	K14491	ARR-B	9.22	8.51	4.09	3.87	3.21	3.71	4.64	Two-component response regulator-like PRR95 isoform X1
Vitvi18g00310	K13946	AUX1	82.07	74.25	24.21	20.41	23.78	9.72	13.23	Auxin transporter-like protein 3
Vitvi03g00122	K13946	AUX1	3.61	5.67			15.45	10.54	13.22	Auxin transporter-like protein 2
Vitvi18g02690	K14499	BKI1	13.23	11.92	3.69	3.94	5.8	4.76	3.61	BRI1 kinase inhibitor 1
Vitvi18g00731	K14505	CYCD3	8.32	10.52			27.13	19.02	20.28	Cyclin-D3-3
Vitvi07g02065	K14516	ERF1	5.29	9.09	24.5	12.09				Ethylene-responsive transcription factor 1B
Vitvi07g02067	K14516	ERF1	3.66	8.36	18.71	19.96				Ethylene-responsive transcription factor 1B
Vitvi05g00715	K14516	ERF1	4.45	11.71	31.84	20.54				Ethylene-responsive transcription factor 1B
Vitvi14g00564	K14516	ERF1	0.73	1.14	10.42	3.06				Ethylene-responsive transcription factor 1B
Vitvi03g00586	K14487	GH3	26.43	50.3	130.24	95.09				Indole-3-acetic acid-amido synthetase GH3.1
Vitvi11g00394	K14484	IAA	13.32	15.43	36.35	26.02				Auxin-responsive protein IAA1
Vitvi01g02293	K13464	JAZ	47.21	48.98			27.96	15.84	25.93	Protein TIFY 9
Vitvi11g00270	K14497	PP2C	125.26	140.92	42.41	46.69				Protein phosphatase 2C 68 isoform X2
Vitvi03g00743	K13449	PR1	9.97	13.74	29.47	24.32				Pathogenesis-related leaf protein 6
Vitvi03g01650	K13449	PR1	12.66	10.56	107.13	58.11				Pathogenesis-related leaf protein 6
Vitvi03g00752	K13449	PR1	2090.39	2071.28			729.85	1050.99	466.16	Basic form of pathogenesis-related protein 1
Vitvi03g00757	K13449	PR1	62.75	55.07			24.83	38.65	22.45	Pathogenesis-related protein 1-like
Vitvi04g01441	K14488	SAUR	2.96	4.32	7.44	7.88				Auxin-responsive protein SAUR50
Vitvi03g00074	K14488	SAUR	5.35	4.84	17.29	7.63				Auxin-responsive protein SAUR24
Vitvi16g01359	K14488	SAUR	19.83	25.78	112.71	43.25				Auxin-responsive protein SAUR32
Vitvi02g00507	K14488	SAUR	27.38	25.61			14.07	9.88	11.15	Auxin-responsive protein SAUR36
Vitvi03g01337	K14488	SAUR	3.79	4.01			11.28	6.24	11.53	Small auxinup-regulated RNA 10
Vitvi11g01265	K14504	TCH4	13.19	15	39.51	28.45				Xyloglucan endotransglucosylase/hy drolase protein 23
Vitvi11g01268	K14504	TCH4	666.14	628.13	197.3	283.9				Xyloglucan endotransglucosylase/hy drolase 2
Vitvi01g00260	K14431	TGA	3.72	5.28			13.06	8.82	10.35	Transcription factor PERIANTHIA

## Sheet: Table S9
Table S9. List of all detected metabolites
Index	Compounds	Class	BN_1	BN_2	BN_3	PN_1	PN_2	PN_3	AN_1	AN_2	AN_3	QC01	QC02	QC03
MWStz040	Pterolactam	Alkaloids	4.55925e+06	5.058e+06	4.98288e+06	4.83564e+06	2.61088e+06	2.98619e+06	2.80949e+06	3.20133e+06	2.80792e+06	3.55227e+06	3.59006e+06	3.46589e+06
pmb0496	N-Feruloylagmatine	Alkaloids	841740	855892	922945	541352	654039	598636	475389	460519	468476	379109	394053	388785
pma2987	Histidinol	Alkaloids	3.44384e+06	3.10194e+06	3.2178e+06	3.15766e+06	3.10182e+06	3.16093e+06	2.7351e+06	2.69231e+06	2.79137e+06	1.55603e+06	1.60764e+06	1.62389e+06
mws0704	O-Phosphorylethanolamine	Alkaloids	199882	165440	175905	123778	120874	115513	127134	106948	112922	251522	261915	261958
mws1417	Indole-3-carboxylic acid	Alkaloids	123947	55918.7	177534	548694	530909	291548	213467	341634	440038	138054	132258	131934
Lmtn001630	2-Glucosyloxy-2-phenylacetic acid amide	Alkaloids	7.91757e+06	7.55079e+06	8.51077e+06	6.16706e+06	3.22367e+06	6.99824e+06	3.47866e+06	2.30172e+06	7.03649e+06	1.66593e+06	1.62439e+06	1.58089e+06
pmb1912	10-Formyltetrahydrofolic Acid	Alkaloids	164777	155525	167164	220140	183053	200948	172969	167164	171293	46723.8	48333.2	49409.6
Zmbp002538	1-Methoxy-indole-3-acetamide	Alkaloids	2.1276e+07	1.84884e+07	2.06489e+07	1.29003e+07	1.00814e+07	1.02857e+07	1.94833e+07	1.80538e+07	1.7249e+07	5.33109e+06	5.46419e+06	5.09546e+06
pmp001198	6-Deoxyfagomine	Alkaloids	169616	160861	150741	178580	131104	142654	119124	131481	150813	71420.1	68227.8	66213.5
pma0948	Phenylethanolamine	Alkaloids	1.0102e+07	9.96493e+06	9.70912e+06	6.62277e+06	6.86527e+06	7.51445e+06	6.03261e+06	5.35877e+06	6.14369e+06	2.75189e+06	2.83257e+06	2.62154e+06
pme1002	L-Tyramine	Alkaloids	2.74441e+07	2.5402e+07	2.60876e+07	1.7776e+07	1.82872e+07	18784805	1.60069e+07	1.36279e+07	1.61212e+07	7.08032e+06	7.28131e+06	6.70249e+06
mws0018	Spermine	Alkaloids	1.11931e+07	1.17042e+07	1.1748e+07	1.05483e+07	1.13737e+07	1.16242e+07	1.06548e+07	9.7185e+06	1.1137e+07	5.12203e+06	5.46993e+06	4.99417e+06
mws0491	2-Phenylethylamine	Alkaloids	3.33944e+06	2.48997e+06	3.79535e+06	1.40403e+06	1.64524e+06	1.41419e+06	914356	855612	892068	562781	553133	513198
pma3649	5-Aminolevulinic Acid	Alkaloids	4.52242e+06	4.87207e+06	4.68549e+06	4.46151e+06	3.85331e+06	4.53859e+06	3.83019e+06	3.31156e+06	4.1468e+06	1.32906e+06	1.21745e+06	1.33914e+06
Lmcp000282	L-Carnitine	Alkaloids	3.47737e+06	2.02337e+06	1.7202e+06	3.35518e+06	3.38031e+06	3.10467e+06	2.64962e+06	2.57749e+06	2.62671e+06	1.94506e+06	1.9504e+06	2.15206e+06
Lmcp000611	2-Amino-4,5-dihydro-1H-imidazole-4-acetic acid	Alkaloids	362154	215004	415572	1.51041e+06	1.05986e+06	1.41162e+06	1.31525e+06	1.60869e+06	2.55063e+06	969418	1.05478e+06	1.0954e+06
MWStz070	N-(2-Hydroxy-4-methoxyphenyl)acetamide	Alkaloids	1.63002e+06	1.7656e+06	1.83758e+06	1.63071e+06	1.27972e+06	1.30579e+06	1.35444e+06	1.2002e+06	1.38162e+06	754595	709772	658150
Qmkp093004	Indole-3-carboxaldehyde	Alkaloids	991261	813139	803368	545278	499596	497145	841299	735571	766132	217849	188087	207513
pmp001287	N-Benzylmethylene isomethylamine	Alkaloids	306413	209618	204492	125334	87526.2	100610	99173	80786	93196.5	35602.8	41061.3	36773.4
pmb0484	Choline	Alkaloids	8.79677e+06	8.72644e+06	8.19738e+06	5.91843e+06	7.72799e+06	6.43519e+06	3.65517e+06	3.75838e+06	3.88314e+06	3.65533e+06	3.57509e+06	3.1046e+06
mws0943	1,4-Dihydro-1-Methyl-4-oxo-3-pyridinecarboxamide	Alkaloids	134668	60603.6	143445	592697	534605	591668	742985	825652	797928	348081	307056	288596
pmb0818	Methoxyindoleacetic acid	Alkaloids	936539	711852	685265	433766	377048	332272	712273	571169	717912	166454	186196	151380
Hmmp001310	3-Indoleacrylic acid	Alkaloids	5.52887e+06	4.43192e+06	4.26823e+06	3.02671e+06	2.58726e+06	2.52373e+06	4.7093e+06	4.21704e+06	4.42063e+06	1.31226e+06	1.11274e+06	1.08788e+06
Hmgp002327	3-amino-2-naphthoic acid	Alkaloids	5.24963e+06	3.84137e+06	4.0924e+06	2.91503e+06	2.2835e+06	2.01171e+06	4.84313e+06	3.67431e+06	4.3641e+06	1.16188e+06	995540	953199
mws0677	N-Acetyl-5-hydroxytryptamine	Alkaloids	155711	140738	99516.7	147955	115685	110898	118876	127651	112917	62504	55113.4	50173.8
pma0702	N1,N8-Bis(sinapoyl)spermidine	Alkaloids	435694	370536	432599	624146	539023	529560	916121	493217	618567	296215	250340	233296
MWS3020	N-Acetylcadaverine	Alkaloids	164337	177523	184063	149958	170826	194514	185389	169548	140130	107418	122430	138598
pme2268	Trigonelline	Alkaloids	567314	563476	430881	373137	311679	341646	293260	316231	261824	269720	215070	214563
mws1346	DL-2-Aminoadipic acid	Alkaloids	57820.9	164359	91202.6	157365	147792	236761	208772	204086	161706	152008	190515	147476
mws4002	Dopamine	Alkaloids	324315	398526	355103	388578	524593	419527	387882	379487	470786	349410	269567	361862
pmb0782	Piperidine	Alkaloids	143833	152161	134463	133134	98403.9	118781	108943	91376.2	103483	47146.8	46778.2	35459.5
MWSslk108	O-Acetyl-L-carnitine	Alkaloids	733234	664256	820423	621828	741809	1.11214e+06	1.91831e+06	2.91498e+06	2.47054e+06	690212	545720	504488
mws0983	N-Oleoylethanolamine	Alkaloids	54136.7	31983.2	46325	96447.2	88235.5	67912.8	80473.5	88051.4	72180.3	30987.8	25352.9	22091.2
Lmyp003387	2-Oxo-3,4-dihydro-1H-quinoline-3-carboxylic acid	Alkaloids	9	9	9	81858.1	9	66921	226789	122085	189798	30772	21805.2	28467.6
Hmcp009963	Candicine	Alkaloids	25467	25601.6	40321.7	27504.4	32564.2	25872.8	23937.2	28154.2	26353.3	7665.54	9540.09	6775.64
Hmtp000776	4,5,6-Trihydroxy-2-cyclohexen-1-ylideneacetonitrile	Alkaloids	44976.3	35098.3	25920.7	15617.3	13247.4	13535.5	17485	16241.5	14541	8595.34	6403.35	6362.88
Zmbp002461	3-(2'-Hydroxyl-phenyl)-4-(3H)-quinazolone	Alkaloids	28640.2	10685.4	25134	30076.8	25712.8	33815	26451.4	15972.7	35759.3	12883.7	11127.9	16076.6
Hmcp002354	Crenatine	Alkaloids	107161	115768	81117.1	82283.6	109565	89302.4	81024.7	79915.7	71551	15469.6	23209.6	23935.8
Zmzp005934	Stearamide	Alkaloids	48958.3	39601.6	41246.6	39148.5	49652.3	34983.1	42716.4	39988.2	40007.9	20251.3	15791.8	12578.8
YC512112	Anabasine-glucoside	Alkaloids	23353	35020.5	41089.4	30863.6	15353.9	25687.3	21588	9904.39	30863.6	9800.61	7614.1	5200.62
MWSmce349	Laurocapram	Alkaloids	17811.7	16312	31225.3	12570	42287	9582.3	44868	11683.8	22837.5	14495.7	9288.01	8297.7
MWS3270	Quinolinic Acid	Alkaloids	9	9	9	46351.3	8877.03	9	9	9	9	8711.79	5370.7	10492.8
Lmgp000796	4-Hydroxymandelonitrile	Alkaloids	193675	161321	188346	71043.9	68323.9	79853.4	53910.4	43584.8	49957.3	53640.1	68303.1	30467.2
MWSmce119	L-Arginine	Amino acids and derivatives	3.56749e+06	4.13875e+06	4.6362e+06	1.53239e+06	1.33691e+06	1.32777e+06	1.32847e+06	1.18051e+06	1.42551e+06	1.13228e+06	1.11147e+06	1.10197e+06
pmb2857	L-Glutamic acid-O-glycoside	Amino acids and derivatives	60692.3	50207.9	58322.9	59949.2	52409.9	82375.8	80498.8	52332.9	38135	167441	162855	165555
mws0250	L-Tyrosine	Amino acids and derivatives	2.30008e+06	2.08542e+06	2.1109e+06	1.64969e+06	1.32248e+06	1.50722e+06	1.73374e+06	1.44164e+06	1.45503e+06	844247	828692	854856
Zmzn000113	L-threo-3-Methylaspartate	Amino acids and derivatives	817387	961085	913595	798718	904500	843365	727523	687500	825226	2.36098e+06	2.47244e+06	2.39e+06
pme0137	N-Acetyl-L-Glutamine	Amino acids and derivatives	538131	523409	476365	565652	534204	674197	789036	637875	882625	700600	685745	664577
mws0258	L-Isoleucine*	Amino acids and derivatives	2.18911e+06	2.46285e+06	2.10969e+06	2.49654e+06	2.57911e+06	2.60432e+06	5.90771e+06	1.85669e+06	1.74491e+06	816629	795376	770317
mws0256	L-Valine	Amino acids and derivatives	4.63812e+06	4.51777e+06	4.64396e+06	3.51379e+06	3.70512e+06	3.76377e+06	3.20992e+06	3.08528e+06	3.76776e+06	2.16111e+06	2.24729e+06	2.36405e+06
pmb0464	L-Aspartic acid-O-diglucoside	Amino acids and derivatives	1.26208e+06	1.49011e+06	1.43223e+06	960137	683888	780015	560627	623204	706779	1.04114e+06	1.14767e+06	1.10515e+06
pme2617	L-Methionine Sulfoxide	Amino acids and derivatives	1.66234e+06	1.60745e+06	1.62867e+06	1.44676e+06	1.56229e+06	1.5433e+06	1.43095e+06	1.36157e+06	1.44098e+06	860613	845852	928058
mws1587	L-Norleucine*	Amino acids and derivatives	3.83153e+06	4.64641e+06	7.71277e+06	4.37454e+06	3.89613e+06	6.29173e+06	3.93063e+06	4.4323e+06	4.3037e+06	1.25815e+06	1.2254e+06	1.1122e+06
MWS4296	Glycylphenylalanine	Amino acids and derivatives	17904.8	39857.9	29200.9	14770.3	91212.8	17859.5	18323.4	24557.6	16960.9	23528.1	20937.8	20918.4
pme0122	N6-Acetyl-L-lysine	Amino acids and derivatives	87286.9	59547.4	85717.4	178280	140277	203836	155862	252667	291286	147221	129363	132625
Zmzp000145	Trimethyllysine	Amino acids and derivatives	295648	238132	709057	425426	381010	563532	352707	408076	474700	467904	395676	423661
mws0219	L-Aspartic Acid	Amino acids and derivatives	1.57938e+06	1.59398e+06	1.68157e+06	1.77336e+06	1.70763e+06	1.55383e+06	1.10027e+06	1.0707e+06	1.26921e+06	4.35943e+06	4.39198e+06	3.76132e+06
pme3827	3,4-Dihydroxy-L-phenylalanine (L-Dopa)	Amino acids and derivatives	9	9	9	280199	305148	307361	9	9	9	187652	160083	184691
Lmqp000427	N-Methyl-Trans-4-Hydroxy-L-Proline	Amino acids and derivatives	70848.7	87383.4	72946.9	98913.4	94057.8	100141	41158.7	79566.3	92597.1	88924.6	98950	83694.2
mws0227	L-Leucine	Amino acids and derivatives	4.0699e+06	4.08678e+06	5.23368e+06	3.33803e+06	3.29807e+06	4.16099e+06	3.30067e+06	2.75428e+06	3.30156e+06	1.13491e+06	1.28572e+06	1.09135e+06
mws0282	L-Tryptophan	Amino acids and derivatives	6.26458e+06	4.16404e+06	5.50032e+06	3.47255e+06	3.36478e+06	3.16114e+06	5.9679e+06	5.27011e+06	6.32951e+06	1.958e+06	1.97199e+06	1.67836e+06
pme0006	L-Proline	Amino acids and derivatives	8.31883e+06	6.85736e+06	8.48542e+06	6.64579e+06	4.92612e+06	5.62151e+06	4.49308e+06	5.65932e+06	6.08175e+06	7.39247e+06	6.1697e+06	6.8328e+06
pme1712	L-Saccharopine	Amino acids and derivatives	10410.3	12336.7	10425	23201.4	11711.2	15179	10796.4	24884.4	26269.1	45497.4	53528.9	46176
MWSmce585	Methyl 3-aminopropanoate	Amino acids and derivatives	948565	850056	858537	690366	683243	632081	481794	385326	459964	400437	387628	333345
MWS2413	N-acetyl-beta-alanine	Amino acids and derivatives	12526.1	10720.8	7633.23	15488.9	8050.91	11178.6	8473.41	10220.2	8226.33	6903.47	5767.43	5966.62
pme2914	3-Hydroxy-3-methylpentane-1,5-dioic acid	Amino acids and derivatives	950865	1.01434e+06	1.09367e+06	858233	581358	701498	632136	716200	858869	449517	371479	379241
pme0021	L-Phenylalanine	Amino acids and derivatives	4.05598e+07	3.03888e+07	2.88732e+07	1.56197e+07	1.31563e+07	1.24121e+07	1.44298e+07	1.42872e+07	1.26241e+07	6.17716e+06	5.22727e+06	5.07274e+06
pme2735	S-(5'-Adenosyl)-L-methionine	Amino acids and derivatives	170795	186578	92719	23665.4	24505.2	10270.2	11531.6	19421.2	15457.2	16214	17460.7	13654.7
Zmyn000155	N-α-Acetyl-L-ornithine	Amino acids and derivatives	27558.4	48181.6	45284.6	15597.8	9629.36	19569.9	23296.1	15249.8	23662.3	41848.6	43867.2	54124.4
pmb2855	L-Glutamine-O-glycoside	Amino acids and derivatives	47566.6	46470.5	69984	27246.1	19857.2	24046.1	15648.1	17039	26056.6	105325	119814	88455.7
MWS0994	N-Carbamoyl-L-aspartate	Amino acids and derivatives	24163.4	19691.3	26603.3	6350.12	14321.8	16112.2	8001.4	7468.4	9670.04	15994.2	12593.2	17479.9
pme2074	Jasmonoyl-L-Isoleucine	Amino acids and derivatives	19456.3	13107	16319	27415.8	51434	23046.2	15790	15260.4	16197.4	4926.6	6398.08	4800.2
mws1050	O-Acetylserine	Amino acids and derivatives	85809	66767.1	48756.1	37172.4	60457.4	72066.4	51625.6	61825.5	57709.9	59506.8	48042.3	42800
mws4134	Oxiglutatione	Amino acids and derivatives	22232.6	31440.6	40116.7	16552.5	12841.3	16458.1	14305.2	16282.1	24928.7	22140.9	23363	16538.3
Hmsp000364	L-Cyclopentylglycine	Amino acids and derivatives	68290.8	62858.3	91547.3	140192	136028	169750	189118	192932	199332	173214	123800	169797
Zmgn002106	N-Acetyl-L-phenylalanine	Amino acids and derivatives	219720	294263	210941	240040	198513	205212	227848	194687	196162	69829.3	56195.1	83282.8
mws0582	S-(Methyl)glutathione	Amino acids and derivatives	77705.1	64602.4	100051	39875.8	27876.7	49670.3	39494.8	32421.5	34258.2	34027.1	40182.6	26591.7
pme3033	N,N-Dimethylglycine	Amino acids and derivatives	274275	204205	214609	129282	104230	116454	114623	111402	93495.5	114123	80151.2	73320.9
Lmhp001670	L-Valyl-L-Leucine	Amino acids and derivatives	82882.6	71719	74124.6	75437.5	94357.6	86083.7	60810.3	62088.1	76071.3	24278.9	19803.8	14028.8
pme0195	L-Cysteine	Amino acids and derivatives	60182	47427	33101	40223.9	37882.4	48435	48146	27246	42381	37614.5	21245	28655
pme3351	Allysine(6-Oxo DL-Norleucine)	Amino acids and derivatives	60722.6	51539.8	57718.3	64537.7	95754.7	78053.1	55417.3	54771.4	54242.7	30985.8	49339.3	30798.9
Lmhp002001	L-Valyl-L-Phenylalanine	Amino acids and derivatives	22493.6	30058.6	21446.3	33070.2	30419	22179.2	24735.5	17861.3	31844.2	7394.69	8602.62	4634.62
MWS1771	L-Tyrosine methyl ester	Amino acids and derivatives	51536.2	29749.5	48282.9	50468.9	29087	51658.2	32090.6	29789.2	36637.8	10953.4	17650.9	25043.7
mws1397	Epicatechin gallate*	Flavonoids	5.35628e+06	4.84569e+06	6.43328e+06	5.30789e+06	6.75642e+06	7.82063e+06	6.84178e+06	5.80986e+06	8.29122e+06	5.28776e+06	5.21848e+06	5.24005e+06
mws0058	Diosmetin (5,7,3'-Trihydroxy-4'-methoxyflavone)	Flavonoids	8.23108e+06	7.1854e+06	7.65761e+06	1.20751e+07	1.25709e+07	1.0889e+07	1.19194e+07	1.26299e+07	1.20421e+07	3.45269e+06	3.46809e+06	3.418e+06
mws0042	Epigallocatechin	Flavonoids	1.28718e+07	1.34464e+07	1.2827e+07	9.21504e+06	9.6889e+06	1.09693e+07	7.08946e+06	5.54507e+06	5.54487e+06	4.06948e+06	4.02654e+06	3.99285e+06
pme1598	Hesperetin-5-O-glucoside	Flavonoids	8.54114e+06	9.20117e+06	1.03083e+07	5.04847e+06	8.70505e+06	5.22377e+06	5.9977e+06	5.85964e+06	4.56702e+06	5.74789e+06	5.68919e+06	5.82158e+06
Hmjp003123	Quercetin-5-O-glucuronide	Flavonoids	4.60929e+07	5.44059e+07	4.54378e+07	3.67537e+07	3.87105e+07	3.87644e+07	3.04122e+07	4.26651e+07	3.45711e+07	1.97712e+07	1.91754e+07	1.96377e+07
pmb2979	Hesperetin-7-O-(6''-malonyl)glucoside	Flavonoids	165514	214802	229224	201433	254579	179473	85573.8	102991	114137	183385	185503	179704
Hmqn003268	5,7,3',4',5'-Pentahydroxydihydroflavone	Flavonoids	2.17155e+06	1.35643e+06	1.88856e+06	1.32363e+06	1.03691e+06	1.73803e+06	1.09316e+06	1.53468e+06	1.26826e+06	217792	211046	215720
mws0049	Gallocatechin	Flavonoids	6.20289e+06	7.28563e+06	6.15179e+06	5.36399e+06	4.67891e+06	4.71652e+06	3.49541e+06	2.87892e+06	2.353e+06	2.57061e+06	2.65115e+06	2.67427e+06
mws0066	Isorhamnetin; 3'-Methoxy-3,4',5,7-Tetrahydroxyflavone	Flavonoids	4.44319e+06	2.98948e+06	4.02823e+06	4.18654e+06	4.54142e+06	4.48926e+06	4.25791e+06	4.48962e+06	3.8984e+06	1.11046e+06	1.11491e+06	1.07318e+06
Lmjp003044	Isorhamnetin-3-O-Glucoside*	Flavonoids	6.91341e+07	6.38758e+07	6.35725e+07	2.95241e+07	3.60483e+07	3.25482e+07	2.72193e+07	2.45808e+07	2.43625e+07	1.69416e+07	1.63415e+07	1.70175e+07
pme0376	Naringenin (5,7,4'-Trihydroxyflavanone)	Flavonoids	396311	447411	447138	473883	554142	478813	413845	308371	364860	144723	142213	148839
pmp000001	Hispidulin (5,7,4'-Trihydroxy-6-methoxyflavone)	Flavonoids	2.03087e+06	2.01851e+06	1.89751e+06	2.41075e+06	2.61211e+06	2.42959e+06	2.50909e+06	3.09333e+06	2.5208e+06	840704	817431	801885
pmf0203	Peonidin-3-O-glucoside	Flavonoids	1.49429e+06	1.81335e+06	1.39954e+06	2.04597e+06	2.87133e+06	1.83499e+06	1.28324e+06	1.37038e+06	1.33818e+06	646551	627447	613215
mws1000	Fustin	Flavonoids	393215	373562	431395	451317	462077	472982	538400	595039	610296	782574	759347	740909
mws0914	3,5,7-Trihydroxyflavanone (Pinobanksin)	Flavonoids	92650.5	86513.5	83257.7	78145.4	83197	79370.6	36913	39126.1	30790.8	24431.1	23029.2	23641
MWSHY0064	Isorhamnetin-3-O-neohesperidoside*	Flavonoids	2.05527e+06	1.49541e+06	1.81386e+06	1.41431e+06	1.1832e+06	943520	952449	1.04201e+06	737708	770219	801492	755469
mws0034	Epigallocatechin-3-gallate*	Flavonoids	9.83637e+06	1.018e+07	8.64082e+06	9.7744e+06	8.6981e+06	1.26933e+07	4.69286e+06	6.44162e+06	6.58956e+06	5.60125e+06	5.32936e+06	5.29647e+06
Hmcp002207	Isorhamnetin-7-O-glucoside (Brassicin)*	Flavonoids	7.34361e+07	5.41108e+07	5.5468e+07	3.06002e+07	3.2709e+07	3.17406e+07	2.61545e+07	1.79671e+07	1.91844e+07	1.59503e+07	1.51836e+07	1.61374e+07
mws1329	Quercetin-7-O-glucoside	Flavonoids	1.0815e+07	1.21261e+07	1.11866e+07	5.25472e+06	6.91201e+06	5.82726e+06	6452937	7.60247e+06	5793359	6.16135e+06	6.01106e+06	5.77132e+06
HJN055	Dihydrocharcone-4'-O-glucoside	Flavonoids	340138	331137	461847	300940	227752	248270	273918	216786	281779	87623.8	93115.9	88450.9
pme0460	Epicatechin	Flavonoids	2.11239e+07	2.82989e+07	1.98349e+07	2.7604e+07	1.76098e+07	2.16318e+07	2.59562e+07	2.00313e+07	2.08838e+07	1.42556e+07	1.39072e+07	1.33448e+07
Lmsp004670	Kaempferol-3-O-glucoside-7-O-rhamnoside*	Flavonoids	7.72359e+06	5.05141e+06	6.22049e+06	4.35221e+06	3.82744e+06	4.58666e+06	4.11389e+06	4.47255e+06	2.79501e+06	2.62068e+06	2.53301e+06	2.45153e+06
pmp000579	Diosmetin-7-O-galactoside*	Flavonoids	1.335e+07	1.0699e+07	1.24437e+07	8.2242e+06	8.36855e+06	6.23837e+06	5.12873e+06	4.2963e+06	4.09116e+06	2.85237e+06	2.97853e+06	2.78642e+06
Hmmp004965	Diosmetin-7-O-glucoside*	Flavonoids	1.48324e+07	1.21907e+07	1.19009e+07	6.39164e+06	6.31772e+06	6.68984e+06	6.41287e+06	5.23718e+06	5.89316e+06	2.81219e+06	3.01685e+06	2.91518e+06
pmb0666	Isovitexin-7-O-(6''-sinapoyl)glucoside	Flavonoids	19276.6	33712.5	36275.3	32573.7	29542.8	43079.6	31738.8	24568.7	23602.1	17873.2	18178.8	19159.5
HJN041	Epicatechin glucoside	Flavonoids	332788	340632	281149	334805	371481	422623	413013	435458	383542	203553	214287	199474
Zmhp003514	6,7,8-Tetrahydroxy-5-methoxyflavone	Flavonoids	2.00779e+06	1.81967e+06	1.70955e+06	2.62189e+06	2.67519e+06	2.56434e+06	2.91522e+06	2.97884e+06	2.52921e+06	823985	833437	773952
Lmhn004030	5,7,3',4',5'-Pentahydroxyflavan (Tricetiflavan)	Flavonoids	1.16795e+07	1.19074e+07	1.20542e+07	1.10584e+07	1.0251e+07	1.18031e+07	1.0134e+07	9.90755e+06	1.34877e+07	7.29465e+06	7.08057e+06	7.67685e+06
MWSHY0121	Luteolin-7-O-glucuronide	Flavonoids	895470	887873	862601	754590	847077	565877	841476	682936	635506	311733	337632	331827
MWSHY0035	Scutellarein-7-O-glucuronide (Scutellarin)	Flavonoids	895470	887873	862601	754590	847077	565877	841476	682936	635506	311733	337632	331827
mws1179	Naringenin-7-O-glucoside (Prunin)	Flavonoids	627004	808979	703322	568875	552176	688001	394610	335468	431734	218804	238106	228408
mws1361	Taxifolin-3-O-rhamnoside (Astilbin)	Flavonoids	3.20192e+06	3.36546e+06	4.49317e+06	2.97405e+06	4.40979e+06	2.86599e+06	4.08987e+06	4.20244e+06	4.21846e+06	3.00224e+06	3.1166e+06	3.26936e+06
Lmtn002796	Aromadendrin-7-O-glucoside	Flavonoids	1.89944e+06	2.07e+06	2.07945e+06	1.5879e+06	2.67499e+06	1.80543e+06	2.63876e+06	1.94358e+06	2.13339e+06	1.34582e+06	1.25158e+06	1.24865e+06
pme1201	Phloretin	Flavonoids	75049.2	65566.5	88944.3	53213.9	50946.6	54990.2	47134.6	45075.8	45315.5	14725.7	13977.3	15342.1
pme3514	Morin	Flavonoids	9.07014e+06	5.14237e+06	7.60766e+06	5.45661e+06	5.60146e+06	6.02878e+06	5.73524e+06	5.64549e+06	4.54167e+06	1.48164e+06	1.35923e+06	1.46946e+06
MWSHY0080	Luteolin-7-O-neohesperidoside (Lonicerin)	Flavonoids	7.2435e+06	6.40052e+06	7.24181e+06	4.94398e+06	4.78208e+06	4.32082e+06	2.58711e+06	4.33005e+06	3.57595e+06	3.04152e+06	3.28785e+06	3.00437e+06
Zmdn002353	Epicatechin-6-C-β-D-glucopyranoside*	Flavonoids	168524	190478	183731	175080	166829	209978	182542	170605	147726	88536.8	80429.1	82665
Zmhp102730	6-Hydroxykaempferol-3,6-O-Diglucoside*	Flavonoids	231936	9	209231	9	123873	96645.1	94723.8	96645.1	9	68954.6	62699.3	63799.6
Lmpp003815	Petunidin-3-O-(6''-O-p-Coumaroyl)glucoside	Flavonoids	5.14686e+07	4.42956e+07	3.78886e+07	2.91395e+07	2.71294e+07	3.12225e+07	2.37685e+07	2.34394e+07	22686648	2.23957e+07	2.03569e+07	2.05591e+07
pmb0603	Chrysoeriol-7,4'-di-O-glucoside	Flavonoids	124109	49513.2	67134.9	58319.9	54706.6	56446	50627.4	29353.3	24256.5	32826.6	30818.4	29537.8
Lmjp004941	3,5,4'-Trihydroxy-7-methoxyflavone (Rhamnocitrin)	Flavonoids	1.98513e+06	1.74909e+06	1.7068e+06	2.63794e+06	2.54948e+06	2.34431e+06	2.63996e+06	2.53224e+06	2.33077e+06	778525	732808	699638
Lmcn003163	Epitheaflavic acid-3-O-Gallate	Flavonoids	8.78571e+06	8.05222e+06	8.32964e+06	8.86609e+06	8.43569e+06	8.66884e+06	8.22604e+06	6.76162e+06	6.88902e+06	3.51956e+06	3.57935e+06	3.22633e+06
mws0355	Catechin gallate*	Flavonoids	6.46634e+06	7.08321e+06	6.69802e+06	7.05325e+06	8.11708e+06	9.03837e+06	8.63417e+06	7.87406e+06	9.86715e+06	5.38846e+06	5.66807e+06	6.03283e+06
pmb0711	Quercetin-7-O-rutinoside	Flavonoids	9.11363e+06	1.12411e+07	1.07643e+07	7.4178e+06	5.67705e+06	6.22516e+06	7.417e+06	9.61294e+06	4.68956e+06	5.70368e+06	5.81347e+06	6.34309e+06
Lmmp003817	Kaempferol-3-O-(6''-malonyl)glucoside*	Flavonoids	1.26871e+06	941634	1.20498e+06	440706	456560	427736	330489	289002	295270	216760	229375	204413
pmp000571	Apigenin; 4',5,7-Trihydroxyflavone	Flavonoids	67285.2	61160.7	65076.9	74056.8	64242.5	67244.9	66395.2	74074.9	58517.1	23362.1	25077.1	22388.7
Smgp004575	Quercetin-5-O-β-D-glucoside*	Flavonoids	3.74646e+07	3.3252e+07	3.15968e+07	1.86995e+07	2.74652e+07	1.56257e+07	2.13099e+07	1.86654e+07	1.5876e+07	1.39857e+07	1.38514e+07	1.25561e+07
HJN087	Naringenin-4'-O-glucoside	Flavonoids	1.83709e+06	1.86267e+06	1.7228e+06	1.51969e+06	1.5288e+06	1.67617e+06	991397	1.01857e+06	954766	617422	573666	645691
Hmmn002691	Eriodictyol-5,3'-Di-O-rutinoside	Flavonoids	11980.7	15686.3	13392.2	8683.73	9454.73	8660.15	20465.1	9447.15	13417.7	7086.15	6346.76	7027.62
Zmcp002666	Quercetin-3,7-Di-O-glucoside	Flavonoids	228123	201068	229422	129262	147243	122189	97492.8	98142.7	103803	64062.2	66295.4	72146.7
Lmmn004625	Dihydrokaempferol-7-O-glucoside	Flavonoids	2.50883e+06	2.55287e+06	2.69394e+06	2.29259e+06	2.74066e+06	2.67438e+06	2.0151e+06	1.82152e+06	2.08701e+06	1.02762e+06	928769	1.04651e+06
Lmsp003252	Isorhamnetin-3-O-sophoroside	Flavonoids	700103	483291	671640	309874	337484	234947	151382	207954	141397	199198	183337	176098
Lmtn002916	Mearnsetin-3-O-glucuronide	Flavonoids	100214	138699	105023	120446	93322.1	134112	92787.1	106525	104932	54409.4	54035.6	60472.3
Zmjn003358	Epicatechin-3-(3''-O-methyl)gallate	Flavonoids	2.58439e+06	3.84074e+06	3.31625e+06	3.26075e+06	3.53712e+06	3.78249e+06	3.68133e+06	3.02029e+06	3.67969e+06	1.64124e+06	1.6195e+06	1.81905e+06
pme2960	Naringenin chalcone; 2',4,4',6'-Tetrahydroxychalcone	Flavonoids	32877.7	44241.1	35394.7	25757.7	29702.1	28651.7	15844.3	10909.9	14381.8	11462.4	10451.9	10138.2
mws0043	Nobiletin (5,6,7,8,3',4'-Hexamethoxyflavone)	Flavonoids	12065.4	34527.9	171294	120573	6500.18	150325	21927.5	132124	232043	28961.2	30470.7	26644.5
MWSHY0195	Hispidulin-7-O-glucoside(Homoplantaginin)	Flavonoids	1.50449e+07	1.40402e+07	1.26425e+07	7.01672e+06	7.3818e+06	7.41545e+06	6.41663e+06	4.36281e+06	4.20666e+06	3.40508e+06	3.13884e+06	2.97885e+06
Zmsp004363	Quercetin-3-O-(6''-O-acetyl)glucoside	Flavonoids	4.52309e+06	3.6431e+06	4.96837e+06	2.70361e+06	3.25612e+06	3.63895e+06	3.08705e+06	2.71354e+06	2.56984e+06	1.58597e+06	1.45542e+06	1.38756e+06
MWSHY0027	Tangeretin (4',5,6,7,8-Pentamethoxyflavone)	Flavonoids	9760.36	25315.6	104994	78099.1	3993.32	111528	13823.3	88805.9	194956	21653.7	18872.9	19967
Hmlp003068	Meratin	Flavonoids	308465	190715	230280	116113	145892	119313	120767	84571.3	100370	77794.9	67843.8	75483.2
mws0061	Quercetin-3-O-galactoside (Hyperin)	Flavonoids	1.71398e+07	1.59271e+07	1.92136e+07	1.28569e+07	1.37511e+07	9.60514e+06	1.11565e+07	1.18449e+07	1.08335e+07	1.08447e+07	1.05051e+07	1.20275e+07
pmb3012	Chrysoeriol-7-O-glucoside	Flavonoids	241748	299770	311830	202625	183566	193269	165108	130147	138859	139735	121113	133041
Hmcn001884	6-Hydroxyluteolin 5-glucoside	Flavonoids	1.03913e+07	9.1467e+06	9.54876e+06	6.15654e+06	6.92356e+06	5.42071e+06	6.5781e+06	6.58973e+06	6.60283e+06	5.55497e+06	6.11892e+06	6.41081e+06
pmp001080	Diosmetin-7-O-Neohesperidoside (Neodiosmin)	Flavonoids	1.11174e+06	708257	728542	804831	1.47904e+06	1.10265e+06	485940	596358	1.03655e+06	349223	319137	369626
pmc1990	4'-Hydroxy-5,7-dimethoxyflavanone	Flavonoids	3.17408e+07	3.17472e+07	3.02317e+07	2.70935e+07	3.21513e+07	3.29185e+07	2.86155e+07	2.70621e+07	2.95323e+07	1.64103e+07	1.42843e+07	1.4756e+07
Hmlp002821	Myricetin-3-O-glucuronide	Flavonoids	725660	811468	687822	610799	739695	849699	965576	790236	913717	367759	394027	339379
Lmjp003655	6-C-MethylKaempferol-3-glucoside	Flavonoids	1.23313e+07	1.14469e+07	1.24709e+07	6.72756e+06	5.95985e+06	6.90231e+06	5.7493e+06	4.504e+06	4.84547e+06	2.63713e+06	2.60449e+06	2.29382e+06
Zmhn001036	Choerospondin	Flavonoids	599305	608024	406179	825942	777361	708021	858061	811364	871379	799637	782293	690530
mws0064	Eriodictyol (5,7,3',4'-Tetrahydroxyflavanone)	Flavonoids	189649	152274	208217	233852	200929	270579	212209	236038	240106	56166.6	59450.2	65412.9
mws1068	Kaempferol (3,5,7,4'-Tetrahydroxyflavone)	Flavonoids	67650.1	42950.1	69048.7	49570.7	56992.6	59970.7	48219.1	60172.7	46336.3	14694.2	15628.6	13365.6
Zmhp005139	Tamarixetin-3-O-(6''-malonyl)glucoside	Flavonoids	1.60696e+07	1.10966e+07	1.22869e+07	5.84785e+06	7.07893e+06	6.9044e+06	3.94883e+06	3.75083e+06	3.90369e+06	2.83935e+06	2.68739e+06	2.42918e+06
Cmyp002064	Yuanhuanin	Flavonoids	1.05381e+07	1.35245e+07	9.28599e+06	5.28461e+06	6.631e+06	5.81251e+06	4.67128e+06	4.17488e+06	4.66269e+06	2.73517e+06	2.4282e+06	2.36524e+06
pme0368	Apigenin-7-O-rutinoside (Isorhoifolin)	Flavonoids	136506	144252	91656.2	126146	223111	89573.2	127067	211439	128055	93901.3	88626.3	80141.8
mws0913	Kaempferol-3-O-galactoside (Trifolin)*	Flavonoids	811488	674048	707619	348006	420165	457499	530250	646874	405657	396279	461447	449757
HJN086	Eriodictyol-3'-O-glucoside	Flavonoids	2.41701e+06	2.19515e+06	2.35365e+06	1.79584e+06	2.47144e+06	2.15194e+06	2.00025e+06	1.92031e+06	1.80311e+06	940326	1.02835e+06	877009
Lmhp206353	Tricin-4'-O-glucoside*	Flavonoids	48871.8	52977.1	29012.3	69752.2	58898.3	47771	54423.5	35940.1	55625.6	21716	18683.1	21363.6
pmp001311	6-Hydroxykaempferol-7,6-O-Diglucoside	Flavonoids	256418	267660	264834	171211	218293	156676	141616	117345	123984	95366.5	81015	88259.2
MWS20148	Apigenin-4'-O-glucoside*	Flavonoids	881080	837991	725204	520332	389794	378533	248963	269179	224404	201763	234954	231433
mws0036	Hesperetin-7-O-rutinoside (Hesperidin)	Flavonoids	17811	22787.9	75766.2	56724.5	61730.1	46204.2	71533.1	102336	47660	35063.9	29737.1	32826.8
mws2118	Phloretin-2'-O-glucoside (Phlorizin)	Flavonoids	1.37942e+06	1.34662e+06	1.51025e+06	1.0868e+06	881773	1.23012e+06	1.04254e+06	1.02269e+06	852644	633145	538430	605718
Lmsn002815	Kaempferol-3-O-rutinoside(Nicotiflorin)	Flavonoids	1.22585e+06	814733	1.12793e+06	1.01228e+06	828835	911358	832151	863712	825223	683519	698319	795114
MWS20145	Eriodictyol-7-O-glucoside	Flavonoids	644462	481468	656661	583740	714718	677390	681572	633369	679849	446361	513366	523745
pmn001644	Quercetin-3-O-(2''-O-acetyl)glucuronide	Flavonoids	992253	570259	656671	489544	345650	329387	327972	269764	200907	130801	129987	111474
pmn001640	Myricetin-3-O-arabinoside	Flavonoids	17277.8	18743.8	20319.8	21600.8	14562.9	30349.3	28904.3	38092	27211.7	16508.2	15437.9	13799.8
mws0091	Quercetin-3-O-glucoside (Isoquercitrin)	Flavonoids	1.27284e+07	1.09584e+07	1.62078e+07	7.86292e+06	1.16746e+07	7.21491e+06	7.32201e+06	1.09432e+07	5.65213e+06	8.13054e+06	6.77799e+06	7.50736e+06
Lmmp003109	3'-O-Methyl-epicatechin	Flavonoids	2.45726e+06	3.19854e+06	2.21822e+06	6.32418e+06	2.39945e+06	1.9897e+06	2.13354e+06	2.34425e+06	2.99916e+06	2.03666e+06	1.9333e+06	1.7018e+06
mws0054	Catechin	Flavonoids	7.50639e+07	7.55205e+07	7.31099e+07	6.59915e+07	6.63036e+07	7.3383e+07	6.10515e+07	6.20478e+07	6.31605e+07	4.14861e+07	4.97835e+07	4.68989e+07
Xmyp005654	Kaempferol-4'-O-glucoside*	Flavonoids	9.51055e+06	2.86405e+06	9.7467e+06	4.89182e+06	4.14653e+06	6.17596e+06	5.61946e+06	4.77169e+06	4.14406e+06	3.05518e+06	3.43396e+06	3.67029e+06
MWS20143	Luteolin (5,7,3',4'-Tetrahydroxyflavone)	Flavonoids	37361.1	37022.6	34532.2	41115.7	37557.1	23599.8	35558.9	29701.6	31402.9	12495.9	12499.4	10603.4
pmp000587	Luteolin-7-O-(6''-malonyl)glucoside	Flavonoids	1.28064e+06	904933	855821	444619	505387	410777	296957	325716	270584	217750	191148	182709
Lmjp002596	Quercetin-3-O-sambubioside*	Flavonoids	410333	397136	394179	288913	344659	216484	236283	242846	225088	152945	183673	176262
Lmjp002906	Rhamnetin-3-O-Glucoside*	Flavonoids	7.3041e+07	6.52136e+07	6.21462e+07	3.7184e+07	3.02934e+07	3.92171e+07	2.61312e+07	2.32412e+07	2.5711e+07	1.66382e+07	1.85384e+07	1.53832e+07
Lmsp004301	3',5,5',7-Tetrahydroxyflavanone-7-O-glucoside	Flavonoids	845009	702038	717483	705251	737271	707671	778468	729307	843567	458698	542895	545299
pme2493	Kaempferol-3,7-O-dirhamnoside (Kaempferitrin)	Flavonoids	686309	575582	675262	675830	581286	700287	615974	731025	500507	530385	445217	457807
Lmmp003903	Kaempferol-3-O-(2''-O-acetyl)glucoside	Flavonoids	838412	672490	691604	256681	366466	277056	298784	317076	214442	134539	154107	128054
Hmjp002999	Isorhamnetin-3-O-rutinoside (Narcissin)*	Flavonoids	2.22798e+06	1.51636e+06	1.58884e+06	1.27765e+06	1.21474e+06	1.0641e+06	675031	1.00548e+06	993238	845602	778654	694678
HJN090	Butin-7-O-glucoside	Flavonoids	1.90173e+06	2.18416e+06	1.76436e+06	1.56206e+06	1.61795e+06	1.69679e+06	906910	1.09049e+06	1.06395e+06	573478	599672	689752
mws2627	Tamarixetin (3,3',5,7-Tetrahydroxy-4'-Methoxyflavone)	Flavonoids	290801	156492	217185	191480	195515	203250	194454	183906	147344	74326.1	61291.7	65874.7
Lmjp002461	Quercetin-3-O-neohesperidoside*	Flavonoids	1.11192e+07	9.77247e+06	1.39969e+07	6.52384e+06	5.39706e+06	5.82526e+06	1.10931e+07	7.74369e+06	4.16474e+06	5.34553e+06	4.62232e+06	5.63829e+06
mws2186	Avicularin(Quercetin-3-O-α-L-arabinofuranoside)	Flavonoids	389049	541964	470360	352290	309260	285288	314195	387864	420417	194503	169874	160075
mws0045	Quercetin-3-O-rhamnoside(Quercitrin)	Flavonoids	613833	876207	654968	772664	525046	818337	722941	887201	856770	355359	303217	296056
pme1777	Cyanidin-3,5-O-diglucoside (Cyanin)	Flavonoids	430061	517929	457751	342453	380169	414238	229930	217184	205970	156439	135315	129035
Hmpp003270	Luteolin-4'-O-glucoside*	Flavonoids	7.2431e+06	7.13491e+06	7.54365e+06	2.6125e+06	4.65147e+06	3.78756e+06	3.31561e+06	5.56506e+06	3.77237e+06	2.65225e+06	2.20433e+06	2.26452e+06
mws0856	Quercetin-4'-O-glucoside (Spiraeoside)	Flavonoids	1.06875e+07	1.05098e+07	1.1187e+07	6.27093e+06	1.08253e+07	6.43667e+06	7204368	7.82039e+06	6.20748e+06	6.4591e+06	7.94213e+06	7.35204e+06
Lmfn003760	Quercetin-4'-O-glucuronide	Flavonoids	4.6739e+06	4.49563e+06	4.85902e+06	3.54458e+06	4.00003e+06	4.24443e+06	4.22332e+06	4.26406e+06	4.14154e+06	1.97934e+06	1.88607e+06	2.29022e+06
Lmpp003929	Peonidin-3-O-(6''-O-p-coumaroyl)glucoside	Flavonoids	4.7139e+06	9.02145e+06	4.21111e+06	7.12407e+06	8.97686e+06	6.76603e+06	4.19833e+06	4.36921e+06	4.36733e+06	3.06203e+06	2.56273e+06	2.57702e+06
pme1793	Pelargonidin-3,5-O-diglucoside	Flavonoids	258984	330493	236747	270144	284855	256370	338718	229641	227293	103970	98803.6	120275
pmp001309	6-Hydroxykaempferol-7-O-glucoside	Flavonoids	3.97255e+07	4.33432e+07	3.52146e+07	2.96358e+07	3.05538e+07	2.7669e+07	2.49479e+07	2.54853e+07	1.96534e+07	1.80293e+07	1.88799e+07	1.53958e+07
Lmsp004721	Tamarixetin-3-O-glucoside-7-O-rhamnoside	Flavonoids	2.00706e+06	1.49542e+06	1.20822e+06	1.25988e+06	1.51642e+06	1.01385e+06	921866	1.03546e+06	741294	815012	746013	657639
Hmcp001578	Isorhamnetin-3,7-O-diglucoside	Flavonoids	358445	208439	161619	114000	132060	131680	82669.7	93083.6	84527.5	66743.6	77542.1	62821.2
Lmpp003465	Myricetin-3-O-β-D-glucoside*	Flavonoids	513457	442494	548795	555394	829836	1.00584e+06	608095	534762	363103	282364	224774	258862
mws0059	Quercetin-3-O-rutinoside (Rutin)	Flavonoids	8.10026e+06	6.92399e+06	6.73518e+06	6.12697e+06	5.70158e+06	5.87689e+06	6.26799e+06	7.36292e+06	5.84551e+06	3.18865e+06	3.97232e+06	3.83276e+06
Lmfn003630	Myricetin-3-O-xyloside	Flavonoids	13679.4	18291.9	21045.3	25919.8	19107.9	29512.1	19511.8	34684.3	46516.1	15353.9	16673.1	13229.9
Lmlp005236	Dihydrokaempferol-3-O-glucoside	Flavonoids	715442	853677	895444	925359	855415	822064	787316	916681	867156	527464	643977	657499
Lmgp004784	Apiferol	Flavonoids	43603.1	30816.9	27587.6	15508.5	30646.9	24923.6	19507	18699.7	11009.2	18037.2	14235.6	16020.8
Lmpp003662	Delphinidin-3-O-(6''-O-p-coumaroyl)glucoside	Flavonoids	1.27464e+07	8.97273e+06	9.80749e+06	5.54117e+06	7.46036e+06	6.29517e+06	8.4179e+06	8.05107e+06	6.6723e+06	5.58767e+06	6.39471e+06	5.0616e+06
Cmqp004699	Fisetin	Flavonoids	25897.3	9	17977	14048	26934.2	13903	21839.8	23576.7	23193.4	11221.9	12290.9	14176.3
Lmsp004137	3,4,2',4',6'-Pentahydroxychalcone	Flavonoids	147465	201716	125125	127750	105028	133102	206830	95480.7	146303	96053.8	78087.9	98025.8
Lmfn004093	Phloretin-4'-O-glucoside (Trilobatin)	Flavonoids	1.99431e+06	2.58398e+06	2.14963e+06	1.84144e+06	2.0057e+06	2.40274e+06	2.37109e+06	1.96692e+06	2.05341e+06	1.22432e+06	982168	1.01756e+06
pmp000237	Apigenin-6-C-(2''-glucuronyl)xyloside	Flavonoids	104928	89392.6	117713	109231	123586	120179	110741	214913	97414.6	70337.6	75543.9	88824.1
pme1605	Kaempferol-3-O-robinobioside(Biorobin)	Flavonoids	3.71576e+06	2.9986e+06	4.64498e+06	2.62907e+06	3.3524e+06	2.2644e+06	2.26055e+06	2.2783e+06	1.9476e+06	2.47136e+06	1.95408e+06	2.39364e+06
MWSHY0061	Kaempferol-3-O-neohesperidoside*	Flavonoids	1.10762e+07	9	5.6994e+06	4.37664e+06	7.30967e+06	7.35264e+06	4.5358e+06	5.42016e+06	9	4.24912e+06	3.36138e+06	4.12768e+06
Lmpp003958	Malvidin-3-O-(6''-O-p-coumaroyl)glucoside	Flavonoids	559361	778756	593390	803333	1.16584e+06	1.07076e+06	497833	545537	589224	444854	360539	360505
pmb3002	Chrysoeriol-7-O-rutinoside	Flavonoids	98720.6	108590	72090	127124	174013	136119	113822	113083	74778.3	92148.2	115292	116752
Hmcp002316	Isorhamnetin-3-O-arabinoside	Flavonoids	645351	558322	542534	239495	255439	267625	178626	177957	165298	96743.7	111481	86456.1
pmb0665	Orientin-7-O-glucoside	Flavonoids	208779	211540	240260	129228	138599	143556	139386	153721	67401.7	91269	116692	97575
mws0089	Kaempferol-7-O-glucoside*	Flavonoids	720280	443420	579339	380238	492178	449844	417597	494988	396965	389807	363144	300426
HJAP006	Syringetin-7-O-glucoside	Flavonoids	131748	126320	96858.6	77631.7	118196	108756	88789.7	87846.5	112753	39305.1	38136.7	30565.7
Lmyp004617	Pinocembrin-7-O-glucoside (Pinocembroside)	Flavonoids	70001.7	64554.9	67147.4	29423.7	26719.1	31104.9	9429.89	7955.21	10356.1	13351.8	12471.2	16008.7
MWSslk254	Kaempferol-3-O-glucorhamnoside*	Flavonoids	6.31582e+06	6.17449e+06	6.64782e+06	4.59661e+06	4.9379e+06	4.68245e+06	4.44851e+06	4.22238e+06	2.88559e+06	2.79474e+06	2.22013e+06	2.2454e+06
Lmsn004797	3-Hydroxyphloretin-4'-O-glucoside	Flavonoids	85333	120451	164946	95570.5	109741	101637	71363	102379	101637	63255	50943.7	66440.9
pmn001583	Quercetin-3-O-robinobioside	Flavonoids	1.01938e+07	9.19156e+06	8.56648e+06	7.46491e+06	8.38964e+06	6.88039e+06	7.35757e+06	9.13034e+06	6.85444e+06	5.77703e+06	4.61373e+06	4.58168e+06
Lmdp004892	Kaempferol-3-O-(6''-malonyl)galactoside*	Flavonoids	1.32686e+06	889211	1.31861e+06	473131	497997	472238	324605	398891	276966	218053	247204	187709
Lmtp003948	3',5',5,7-Tetrahydroxy-4'-methoxyflavanone-3'-O-glucoside	Flavonoids	415753	541113	527429	470528	517718	690450	435694	480434	537131	258923	200273	254601
Hmbp002730	Isoscutellarein	Flavonoids	31854.8	22972.1	24494.1	34451.3	27418.9	31860.8	28241	30022.4	24539.3	7783.74	9859.66	10090.7
HJAP120	Rhamnetin-3-O-Rutinoside*	Flavonoids	2.00335e+06	1.61037e+06	1.8009e+06	1.43319e+06	2.44982e+06	1.11309e+06	839168	1.19703e+06	929911	641629	847167	770043
Lmdp003286	Isohyperoside*	Flavonoids	3.31087e+07	2.36495e+07	3.40228e+07	2.22134e+07	2.50396e+07	2.07526e+07	1.65692e+07	2.40872e+07	1.8773e+07	1.43319e+07	1.23379e+07	1.08104e+07
mws1422	Epiafzelechin	Flavonoids	15718.2	11239.2	21669.9	9060.53	14774.8	27258.4	6739.49	8982.73	13485.7	12291.3	14771.6	11226.7
Lmjp003231	Patuletin-3-O-glucoside	Flavonoids	76922.9	76634.3	67738.9	79460.4	71701.4	105457	83792.6	110041	61036.4	37822.6	50428.6	45776.9
Smsp002643	Pelargonidin-3-O-rutinoside	Flavonoids	5.71274e+06	2.93785e+06	3.54718e+06	2.68121e+06	4.44678e+06	3.88644e+06	3.3296e+06	3.26754e+06	3.36141e+06	2.98684e+06	2.58386e+06	2.24078e+06
MWSHY0136	Kaempferol-3-O-glucoside (Astragalin)*	Flavonoids	6.6021e+06	5.46942e+06	6.66206e+06	3.18334e+06	4.51503e+06	3.67597e+06	3.86219e+06	3.97013e+06	1.64518e+06	2.54812e+06	2.036e+06	1.97659e+06
HJAP064	Isorhamnetin-3-O-(6''-malonyl)glucoside	Flavonoids	1.48717e+07	1.03946e+07	1.09034e+07	6.17909e+06	6.11817e+06	5.35128e+06	4.47172e+06	4.06331e+06	3.72606e+06	3.03809e+06	2.73639e+06	2.27225e+06
Hmcn002875	6-Hydroxyluteolin	Flavonoids	93017.9	72136.6	84436.9	73829.5	67435.8	84514.8	85621.7	83794	68184.5	15015.6	13972.3	11222.9
Jmgn004021	6-C-Glucosyl-2-Hydroxynaringenin	Flavonoids	1.487e+07	2.17126e+07	1.41823e+07	1.93804e+07	1.64866e+07	2.77034e+07	1.70718e+07	15293841	2.97235e+07	1.14665e+07	1.54892e+07	1.36261e+07
Lmsp004166	Quercetin-3-O-glucoside-7-O-rhamnoside*	Flavonoids	1.02027e+07	9.60761e+06	1.07318e+07	7.38679e+06	8.16649e+06	7.05895e+06	6.7092e+06	9.87407e+06	6.26504e+06	5.6599e+06	4.54013e+06	4.31304e+06
Zmdn002400	Epicatechin-3'-O-β-D-glucopyranoside*	Flavonoids	247381	209134	265860	261790	491953	241059	311270	215113	281157	84896.5	113376	108837
Lmmp002463	Sexangularetin-3-O-glucoside-7-O-rhamnoside	Flavonoids	1.82508e+06	1.01495e+06	1.29304e+06	996571	1.43985e+06	1.44234e+06	1.00657e+06	1.03109e+06	901025	883839	652080	764165
mws1661	Diosmetin-7-O-rutinoside (Diosmin)	Flavonoids	3.48907e+06	7.85435e+06	4.08125e+06	5.1647e+06	7.89006e+06	5.77412e+06	4.76501e+06	5.33342e+06	6.03021e+06	2.86609e+06	2.11184e+06	2.66026e+06
Hmcp002187	Limocitrin-3-O-galactoside	Flavonoids	62027.4	116411	97200	91432.7	72038.7	89184	91165.3	117240	97747.6	52017.6	42511.7	38726.1
pmb3041	Tricin-7-O-saccharic acid	Flavonoids	282684	158016	373685	277759	381137	321855	258810	223367	249763	291021	317579	231469
Lmfp004055	Morin-3-O-xyloside	Flavonoids	539845	762268	661743	465150	431527	600863	446296	576916	597313	310233	244895	232923
Zmhp002730	6-Hydroxykaempferol-6,7-O-Diglucoside*	Flavonoids	177239	162166	214349	85067.9	117755	80645.1	92803.8	93445.1	79154.4	60803.8	71655.8	51823.6
Li512111	Isorhamnetin-3-O-(6''-acetylglucoside)	Flavonoids	6.43462e+06	4.04091e+06	4.40154e+06	2.21135e+06	1.69056e+06	1.93633e+06	1.72251e+06	1.13137e+06	963976	776334	1.07017e+06	888158
mws1073	Apigenin-6,8-di-C-glucoside (Vicenin-2)	Flavonoids	138993	146607	136762	132261	141037	145829	131355	140600	95229	62283.6	44815.1	56189.1
Hmgp001888	Patuletin-3-O-rutinoside	Flavonoids	88114.1	71669.3	89277.9	26321.2	21747.6	35486.4	32052.9	19463.4	25031.8	21747.6	17174.4	24041.4
Lmfp003403	Quercetagetin-7-O-glucoside(Quercetagitrin)	Flavonoids	446346	361944	328180	566136	784030	412946	531004	275906	365251	181141	231166	254601
pme2954	Quercetin	Flavonoids	62459.5	55273.7	61258	52895.2	42950.1	38651.4	42066.8	48614.1	31469.8	16711.1	22516.5	17251
Lmlp003531	Luteolin-3'-O-glucoside*	Flavonoids	5.79753e+06	5.18509e+06	5.99381e+06	2.92813e+06	3.09697e+06	3.81265e+06	3.70928e+06	4.42482e+06	2.85695e+06	1.62711e+06	2.2286e+06	1.74684e+06
Hmpn005101	Sieboldin	Flavonoids	398049	603890	552181	545002	675710	600726	735404	678204	753175	315605	228819	314905
Lmlp005572	Galangin-7-O-glucoside	Flavonoids	696965	786667	701031	342480	306938	314087	323983	251383	247798	155188	201415	220528
Cmsp002257	Peonidin-3-O-sambubioside	Flavonoids	263754	191767	248900	200273	209412	174085	129924	108209	125535	94207.1	66017.8	83843.8
HJAP005	Laricitrin-3-O-glucoside	Flavonoids	112511	114005	62214	58285.1	71701.4	106603	63133.1	123795	69218.1	25262.9	32052.9	22966.9
Lmmn003398	Kaempferol-3-O-(6''-O-acetyl)glucoside	Flavonoids	320617	143670	232015	94098.7	100363	69329.6	50610.4	101727	51855.2	50413.2	58213.2	40638.9
pmp001106	Vitexin-2''-O-glucoside	Flavonoids	26587.1	20416.5	25059.8	23819.3	13615.6	18088.5	19106.1	23261.2	29478.8	10888.1	9878.06	7597.06
pmb3023	Eriodictyol-8-C-glucoside	Flavonoids	965237	1.1668e+06	1.09273e+06	1.44721e+06	962164	1.10756e+06	1.20585e+06	739445	1.12589e+06	509531	654848	469690
pme1611	Isohemiphloin	Flavonoids	79948.4	108897	103862	126505	133649	144379	139585	159262	99253.6	101228	111723	77464.4
Zmdn002049	Epicatechin-4'-O-β-D-glucopyranoside*	Flavonoids	256484	278676	243208	275847	227310	261179	268605	231540	225953	117004	105442	149016
Lmsp004749	Syringetin-3-O-rutinoside	Flavonoids	6607.4	9942.62	9767.01	17436.4	12040.6	12109.9	19351.7	23753.1	24876.7	12109.9	9584.26	14118
Xmsn002700	Taxifolin-3'-O-glucoside	Flavonoids	413033	415670	431287	278936	292075	306604	267141	322255	263418	268467	295672	200683
MWSHY0189	Apigenin-7-O-glucoside(Cosmosiin)*	Flavonoids	698799	757684	741040	356038	351014	297747	301295	198748	164648	190580	182363	129778
pmp000596	Quercetin-3-O-(2''-O-galactosyl)glucoside	Flavonoids	32819.1	27606.6	29717.9	23985.1	25315.9	29717.9	17612.4	31488.2	16566.6	25315.9	25168.6	17506.6
HJAP148	Kaempferol-3-O-sambubioside	Flavonoids	334500	184013	232633	128947	148741	155857	121478	159227	116775	86299.9	96703.4	126027
Lmpn006208	8-Methoxykaempferol-7-O-rhamnoside	Flavonoids	39628	53041.1	48904.9	29230.2	35776.1	41197.6	30742.7	43766.9	29744	12528.4	17918.7	13070
pmb0672	Isovitexin-7-O-(6''-feruloyl)glucoside	Flavonoids	44632.6	93785.2	73997.6	124291	221242	110600	88794.9	122769	145483	75616.3	54767.3	82997.9
Lmsn006753	Phloretin-4'-O-(6''-p-Coumaroyl)glucoside	Flavonoids	22304.4	33469.1	23929.8	12362.5	26278.6	18128.1	14563.2	15190.8	15656	4242.53	6371.85	6088.04
Lmyn001269	Kaempferol-3-O-sophoroside	Flavonoids	90322.2	93810.3	73504.1	53540.6	65063.1	63031.3	23640.4	16471.2	15642.6	22359	14697.7	17717.6
pmp000589	Quercetin-7-O-(6''-malonyl)glucoside	Flavonoids	2.54765e+06	1.14212e+06	1.96914e+06	1.05831e+06	1.50257e+06	816635	977070	832010	802324	470564	692392	716861
Zmjp004852	5,6,3',4'-Tetrahydroxy-3,7-dimethoxyflavone-6-O-glucoside	Flavonoids	95123	106170	123172	86718.9	101128	84038.5	81717.4	106218	76679.9	66872	43411.9	52097
HJN051	Tamarixetin-3-O-rutinoside	Flavonoids	1.38905e+07	1.06371e+07	1.4497e+07	7.0851e+06	1.14199e+07	1.17489e+07	9.95093e+06	8.96475e+06	8.40391e+06	7.55506e+06	9.50501e+06	6.09225e+06
mws0044	Taxifolin(Dihydroquercetin)	Flavonoids	560145	579512	603631	474884	474630	710998	281867	280575	343026	193270	182141	123827
pmn001642	Kaempferol-3-O-(2''-O-acetyl)glucuronide	Flavonoids	80574.5	66151	90270.9	85591.9	70229.8	54725.3	84697.7	30339.6	73315.4	18645.2	29603.4	25500.2
MWSHY0104	Luteolin-7-O-glucoside (Cynaroside)	Flavonoids	3385830	3.1989e+06	3.15986e+06	2.17843e+06	2.99952e+06	2.52691e+06	2.13691e+06	908386	1.05478e+06	1.33628e+06	866747	1.00565e+06
mws0056	Myricetin-3-O-rhamnoside (Myricitrin)	Flavonoids	268710	218096	160997	174219	174939	235162	326455	307144	288303	74264.7	116098	89485.4
mws2220	Gallocatechin 3-O-gallate*	Flavonoids	1.40378e+07	1.27619e+07	1.4294e+07	1.07175e+07	8.42576e+06	9.97079e+06	6.18952e+06	6.23417e+06	7.12082e+06	6.81446e+06	5.09394e+06	4.38793e+06
Lmdp002969	Myricetin-3-O-galactoside*	Flavonoids	511326	495120	609472	436152	694549	732005	585894	491087	481270	308364	196012	233296
Lmlp006175	Isosalipurposide (Phlorizin Chalcone)	Flavonoids	981066	1.08693e+06	951603	722972	825766	812436	468189	437057	476534	230069	340726	234559
Lmzn001875	Naringenin-7-O-Rutinoside-4'-O-glucoside	Flavonoids	11465.3	8986.13	14652.3	16490.3	9637.6	10130.5	11902.5	14039.9	11528.7	7047.78	10364.6	7009.55
Lmtp004044	Quercetin-3-O-apiosyl(1→2)galactoside*	Flavonoids	329162	361008	498971	327495	268900	267851	263531	311015	315238	195491	139315	126371
Lmpp003789	Cyanidin-3-O-(6''-O-p-Coumaroyl)glucoside	Flavonoids	7.6469e+06	6.03574e+06	7.12729e+06	4.92456e+06	3.22386e+06	5.11534e+06	2.43484e+06	3.65885e+06	2.8593e+06	3.23448e+06	2.51453e+06	1.99131e+06
Hmln002199	Quercetin-3-O-(6''-O-acetyl)galactoside	Flavonoids	759645	431954	887109	425226	437628	423189	262904	305551	261337	211620	229943	140394
mws1094	Aromadendrin (Dihydrokaempferol)	Flavonoids	142653	130884	149406	206568	184011	214210	146194	119214	120734	56403.5	54634.3	34481.2
Lmtp004722	Mearnsetin	Flavonoids	83149.5	65906.6	82255.7	101078	101795	79942.2	70371.3	39349	65910.7	25942.3	17203	29006.3
HJAP154	Galloylisorhamnetin	Flavonoids	258225	267809	184746	259536	132802	254903	196033	274155	168382	155974	179339	105173
pma0791	Naringenin-7-O-(6''-malonyl)glucoside	Flavonoids	196945	203159	197744	174944	161321	156779	120152	102275	133576	76309.4	65147.4	44639.6
pmb2987	Acacetin-7-O-(6''-O-acetyl)glucoside	Flavonoids	73602.8	66493.3	69029.9	73513.4	65870.1	68773.7	72415.7	66486.9	65946.4	29937	24180.1	40751.8
mws1066	Naringenin-7-O-Rutinoside(Narirutin)	Flavonoids	8005.41	10384	18241.9	16591.2	15812.7	9414.9	15930.9	9414.9	13034.9	6488.82	11306.8	10213.9
pmb2991	Apigenin-7-O-glucoside-4'-O-rutinoside	Flavonoids	68264.7	60407.6	63927.7	36747.1	51436.9	76873.3	65210.8	66979.3	57477.2	16431.5	26920.4	29225.8
Lmdp003509	Quercetin-3-O-xyloside (Reynoutrin)	Flavonoids	692217	674778	674388	498998	542084	480212	473508	570385	467042	232019	175890	313463
Lmln001951	Quercetin-3-O-(6''-O-arabinosyl)glucoside	Flavonoids	30064	19379.7	24123	14847.8	12009.1	19027.4	16897.1	16088.1	17525.8	7015.76	10643.5	6352.42
pmb0736	Tricin-7-O-Glucoside*	Flavonoids	40991	46327.2	40983.1	38833.5	33006.5	62578.7	39247	36624	33092.3	18868.1	10425.5	13961.6
MWSHY0092	Eriodictyol-7-O-Rutinoside (Eriocitrin)	Flavonoids	217364	202345	188966	111626	116993	109257	92847.8	107887	72270.4	113156	69663.7	70579.1
Hmmp002121	Isorhamnetin-3-O-gallate	Flavonoids	277262	223023	282137	190998	199751	235295	215269	184494	148497	154192	105437	88321.5
Hmgp003086	Tricin-7-O-rutinoside	Flavonoids	746235	854464	564447	904413	1.20389e+06	774635	454736	846717	570845	455148	331825	250638
pmb0628	Eriodictyol-8-C-glucoside-4'-O-glucoside	Flavonoids	18346.1	8452.31	10058.6	7452.98	3826.11	3888.11	9270.22	15553.1	18142.5	4657.65	8413.78	8356.31
Hmcp001598	Isorhamnetin-3-O-(2''-O-xylosyl)glucoside	Flavonoids	68624.8	49558.9	84556.2	33642.7	25532	21041.1	18616.7	14571.7	24033.7	17738.4	10104.1	11803.9
Lmlp007435	Isosalipurposide-6''-O-p-coumaric acid	Flavonoids	21271	32941.4	16309.4	19876.3	20886.2	20168.5	10417.9	11963.8	11155.8	3486.5	6608.15	5002.82
mws0919	Kaempferol-3-O-rhamnoside (Afzelin)(Kaempferin)	Flavonoids	35013.8	38694.2	29889.6	28467.6	24318.1	20436.6	26434.9	45232.3	21861.2	9155.4	17223.7	12672.4
Lmyp004052	Quercetin-3-O-(6''-O-p-Coumaroyl)galactoside	Flavonoids	83156.7	105719	48099.6	55630	41914.2	46642.3	35983.9	38365.8	22137.5	33574	33287	18160.2
Lmsp003790	Isorhamnetin-3-O-sophoroside-7-O-rhamnoside*	Flavonoids	33946.1	39259.8	30371.8	16391.3	16236.5	24419.2	33946.1	21490.3	13620.4	22466.6	11529.8	20184.8
HJN079	Pinocembrin-7-O-rutinoside	Flavonoids	38695.9	20941.8	31430.8	29151.2	20327.2	39159.7	29669.8	20914.1	42226.4	7266.42	12183.5	7132.33
Cmxn004016	Dihydromarein	Flavonoids	143113	111898	126098	75528.4	93303.3	74089.9	69475.2	47639.8	61143.4	52512.4	33278.8	66255.3
Lmpp003719	Peonidin-3-O-(6''-O-caffeoyl)glucoside	Flavonoids	46930.8	101810	69821.4	42337.2	98378.8	68676.9	44642.1	50160.5	45762.5	37630.4	21612.1	21752.4
pmb0592	Chrysoeriol-7-O-rutinoside-5-O-glucoside	Flavonoids	34158.9	36183.3	30744.1	77407.5	54577.1	90955.8	32052.9	23914.6	37488.4	54174.8	28231.8	34158.9
Lmmp003091	Quercetin-3-O-(4''-O-glucosyl)rhamnoside	Flavonoids	1.52228e+07	1.21492e+07	1.03604e+07	8.16607e+06	9.03501e+06	7.22439e+06	5.68602e+06	7.97243e+06	5.48299e+06	7.31337e+06	5.28663e+06	3.48184e+06
Lmcp003402	Tamarixetin-3-O-glucoside (Tamarixin)	Flavonoids	42061.9	149710	65004	20762.5	42004	44981.5	51978	36053.1	34619	49761.5	31484.4	24618.2
HJAP135	Pinocembrin-7-O-(6''-O-malonyl)glucoside	Flavonoids	24786	13200.1	19757.3	13992.5	16626.7	9102.84	10202.8	8118.29	9097.7	5867.23	6384.04	2872.26
mws0046	Naringenin-7-O-Neohesperidoside(Naringin)	Flavonoids	37610.5	37078	56925.7	50439.3	48041.9	49718.8	49718.8	46744	31858.9	29544.8	18371.8	40871.9
pmb2999	Chrysoeriol-5-O-glucoside	Flavonoids	55282.5	43010	57137	35184	43039	35944.5	34296	54663.2	23731	101307	68777.8	150017
Zmxp004480	Chrysoeriol-7-O-gentiobioside	Flavonoids	54913.2	101160	50363.9	66046.7	100188	56087.4	23074.6	52295.8	23713.5	52376.6	25093.7	30908.4
Lmpp003228	Petunidin-3-O-(6''-O-caffeoyl)glucoside	Flavonoids	86969.9	55744.3	52625.5	30726.1	34334.4	46931.4	36630.9	41208.9	34131.8	34334.4	16029.9	20607.9
pmb0606	Chrysoeriol-7-O-glucuronide	Flavonoids	12076.9	26787.8	17792.9	17790.7	13174.4	9886.39	17986.7	26976.7	35955.7	21358	48317.2	30734.4
Lmmp003672	8,8'-Methylenebiscatechin	Flavonoids	79416.4	30025.5	46592.3	54873.1	58897	35583.6	67707.5	24918.3	38350.6	16904.1	18683.1	34576.3
Lmtp004126	Myricetin-3-O-(6''-malony)glucoside	Flavonoids	40808.3	41835.2	38154.7	24712.7	20200.5	39442.3	24666.5	19080.7	16855.5	16827	12553.7	6738.73
HJAP023	Kaempferol-6,8-di-C-glucoside-7-O-glucoside	Flavonoids	14257.8	14814.1	9342.67	16833.1	13438.7	19362.6	14023.4	22794.8	19478.9	4739.74	9506.57	4780.23
Lmjp003295	6-Methoxykaempferol-3-O-glucoside	Flavonoids	9	9	9	2.88495e+06	4.5946e+06	6.78538e+06	9	3.83046e+06	5.14242e+06	2.35095e+06	1.54622e+06	957175
Lmdp003808	Azaleatin (5-O-Methylquercetin)	Flavonoids	264594	230154	365679	95047	97311.8	102217	122252	60674.1	100653	106384	40604.7	92640.7
Hmcp001589	Isorhamnetin-3-O-rutinoside-4'-O-glucoside*	Flavonoids	34341.7	22248	32927.7	14358.6	16674.5	12574.6	6374.83	9	12149.4	13769.8	16181	5921.39
Lmbp003668	Kaempferol-3-O-arabinoside	Flavonoids	48014.6	27868.3	34880.3	18716.3	26927	25634.4	11238.5	18008.2	25065	8795.27	7819.97	17373.5
Lmmn002274	Isolariciresinol-9'-O-glucoside	Lignans and Coumarins	345029	356169	360125	392240	403484	313692	404022	409142	398109	235249	228406	240472
MWS20152	Syringaresinol	Lignans and Coumarins	16040.7	16908.5	18935	51422.8	39136.8	56689.4	42711.4	55059.7	56729.1	14135.3	15268.6	14925.1
MWSmce195	Dehydrodiisoeugenol	Lignans and Coumarins	9	9	9	10534	8241.14	30334.8	13308.4	46357.1	41617.3	6314.68	5802.58	6000.94
Lmyn003971	Dihydrodehydrodiconiferyl alcohol-4-O-glucoside	Lignans and Coumarins	318965	339650	312491	358237	381899	408012	390846	378303	421876	226127	205334	201615
pmp000682	Matairesinol-4'-O-glucoside (Matairesinoside)	Lignans and Coumarins	640294	686032	597274	414624	416209	369985	407304	338481	382646	149569	164201	172825
pmn001378	Pinoresinol-4-O-glucoside	Lignans and Coumarins	127573	165073	143764	144621	140067	133891	76414.8	88271.2	99474.9	81607.6	88594.4	95844.5
pmn001492	Ayapin	Lignans and Coumarins	121211	83542.4	113450	149969	182592	151957	141342	142855	152009	67048.7	64434.6	55731
Lmdn004267	Epipinoresinol	Lignans and Coumarins	64317.8	54008.5	61573.8	69808.7	83581	80326.5	53741.2	52092.8	60561.2	30074.9	25048.7	26372.6
Lmmn003020	Lyoniresinol	Lignans and Coumarins	57388.9	48347.3	43700.7	73381.7	109916	154881	88204.3	96699.3	135055	72407.1	77595.3	87483.9
Hmgn002833	4-Ketopinoresinol	Lignans and Coumarins	11927.3	13078.6	13733.2	18975.7	13122.7	16752.7	17196.1	15615.8	17689.2	6776.86	6298.07	5559.93
Lmtn003096	Secoisolariciresinol 4-O-glucoside	Lignans and Coumarins	63200.6	66407.7	65133.5	96868.2	89714.1	78186.8	106170	88621	108348	51614.8	60709.9	50983.7
Zmhn001446	Syringaresinol-4'-O-glucoside	Lignans and Coumarins	265408	311447	327550	363857	407065	362426	499102	535342	516327	283763	257346	314636
mws0097	Pinoresinol	Lignans and Coumarins	77873.8	74160	75749.9	93650.6	94035	66902	60345.7	48599.4	68007.3	29640.8	23415.4	24211.9
HX1372	guaiacylglycerol-β-coniferyl ether	Lignans and Coumarins	40427.8	32577.8	39060.9	82094.4	74461.4	67372.3	81275.7	67984.6	65706.2	18928.2	15332.9	19828.2
Hmln002100	Nortrachelogenin-4-O-glucoside	Lignans and Coumarins	19517.5	28425	24455.3	14500.6	10660	15281.7	17281	11205.6	34021.6	9474.08	9477.76	7328.66
Cmpp007319	7-Methoxy-5-Prenyloxycoumarin	Lignans and Coumarins	11111.2	9739.84	6905.33	11804.6	4503.82	6562.11	7609.5	5315.36	6503.49	3675.28	3001.29	2515.21
Qmzp101838	Scopoletin (7-Hydroxy-6-methoxycoumarin)	Lignans and Coumarins	44122.8	55438.8	56334.8	95322.8	57768.7	66514.8	49952.7	76538.8	104620	19280.8	29188.1	25652.7
Lmmn002260	5'-Methoxyisolariciresinol-9'-O-glucoside	Lignans and Coumarins	96731.6	115403	79494.7	106284	188224	190347	168944	181810	200352	90182.7	80166.5	118858
mws1015	Esculin (6,7-Dihydroxycoumarin-6-O-glucoside)	Lignans and Coumarins	22830.1	19912.4	24798.3	19724.8	19575	21114.6	20244.4	22357.8	31669.1	16550.5	8759.28	11047.7
Lmbn001162	Esculetin-7-O-glucoside	Lignans and Coumarins	22830.1	19912.4	24798.3	19724.8	19575	21114.6	20244.4	22357.8	31669.1	16550.5	8759.28	11047.7
Cmyn001328	Daphnin	Lignans and Coumarins	22830.1	19912.4	24798.3	19724.8	19575	21114.6	20244.4	22357.8	31669.1	16550.5	8759.28	11047.7
mws0367	α-Linolenic Acid	Lipids	2.52156e+07	1.93524e+07	2.99907e+07	4.35275e+07	3.90178e+07	4.13352e+07	5.50014e+07	4.90562e+07	5.34735e+07	1.7576e+07	1.74988e+07	1.75669e+07
Rfmb087	9-Hydroxy-13-oxo-10-octadecenoic Acid	Lipids	488637	403006	475851	988968	1.00542e+06	962429	850996	792060	731006	205425	205614	206534
MWSmce692	γ-Linolenic Acid	Lipids	43954	36642.3	57812.3	97335.1	77545.6	85416.1	136133	105269	121878	38286.1	38346	38531.3
Hmqn003054	9,10,11-Trihydroxy-12-octadecenoic acid	Lipids	36280.9	25749.1	40802.3	59657.3	65772.3	52072.7	44951.1	45664.8	46369.2	13911.7	14059	14079.5
Lmyn012331	Petroselinic acid*	Lipids	2.42243e+07	2.06372e+07	2.82836e+07	5.08219e+07	5.06945e+07	5.03328e+07	6.14801e+07	5.54698e+07	5.42597e+07	2.61546e+07	2.61144e+07	2.56929e+07
mws0396	Elaidic Acid*	Lipids	2.42243e+07	2.06372e+07	2.82836e+07	5.08219e+07	5.06945e+07	5.03328e+07	6.14801e+07	5.54698e+07	5.42597e+07	2.61546e+07	2.61144e+07	2.56929e+07
pmn001610	Eicosadienoic acid	Lipids	1.23017e+06	1.08283e+06	1.60778e+06	4.35307e+06	3.68306e+06	3.80598e+06	6.4113e+06	7.35509e+06	5.9612e+06	1.37605e+06	1.39406e+06	1.4057e+06
pme2827	Palmitaldehyde	Lipids	6.75338e+07	6.7466e+07	6.32847e+07	5.37074e+07	5.90714e+07	7.4894e+07	7.13126e+07	7.03984e+07	8.05033e+07	3.99638e+07	4.07886e+07	4.01169e+07
Lmyn007883	9,16-Dihydroxypalmitic acid	Lipids	487478	422919	519261	1.17979e+06	1.23576e+06	1.15669e+06	1.83603e+06	1.7697e+06	1.77666e+06	355008	346167	354974
Lmbn005369	13(S)-HODE;13(S)-Hydroxyoctadeca-9Z,11E-dienoic acid*	Lipids	607983	459190	674050	989786	1.07571e+06	1.03797e+06	842113	894714	786994	254820	254671	248361
Zmpn003368	13S-Hydroxy-9Z,11E,15Z-octadecatrienoic acid	Lipids	92140	73111.2	99817.4	85136	104217	83456.6	51325.6	54823.5	53905.4	23532.9	23276.3	24025
pmn001694	9,10,13-Trihydroxy-11-Octadecenoic Acid	Lipids	394465	299239	368258	618587	693912	550987	491981	480385	455880	137083	134380	132559
Zmyn004676	17-Hydroxylinolenic acid	Lipids	362875	261128	396566	721952	830045	871350	753256	867756	767123	193360	187415	188187
MWS80006	9-Hydroperoxy-9Z,11E-Octadecadienoic Acid	Lipids	55963.5	56778.1	79522.1	209603	235162	238173	296470	304487	294173	51166.2	51720.7	52905.8
pmd0160	LysoPE 16:0(2n isomer)	Lipids	1.64222e+06	1.54047e+06	1.34267e+06	1.61192e+06	1.60674e+06	1.43526e+06	1.21976e+06	1.46269e+06	1.22606e+06	410378	425488	418923
Zmzn003953	13(s)-hydroperoxy-(9z,11e,15z)-octadecatrienoic acid	Lipids	215505	186046	221523	259374	258112	252419	219866	340484	295209	163048	162328	157620
pmb0855	LysoPC 16:0	Lipids	1.01507e+07	7.95413e+06	9.16838e+06	1.36451e+07	1.30335e+07	1.25088e+07	1.17815e+07	12232725	1.07911e+07	2.85621e+06	2.95578e+06	2.86283e+06
Lmbn005487	12,13-DHOME; (9Z)-12,13-Dihydroxyoctadec-9-enoic acid	Lipids	233867	192647	263847	388718	497117	398104	755461	741481	798328	120371	125062	124691
MWSslk132	Hexadecanedioic acid	Lipids	170495	149746	222765	427421	466928	428372	509765	483584	517025	117687	121959	122403
pmb2640	Dodecanoic acid (Lauric acid)	Lipids	378839	329883	338331	300069	358147	335078	464749	516556	452613	133241	127481	129466
MWS5231	Tridecanedioic acid	Lipids	59103.2	55834.2	63632	94231.8	96925	91607.2	106499	119197	100528	56518.9	56428.5	54165
pmb2804	13S-Hydroperoxy-9Z,11E-octadecadienoic acid	Lipids	119932	91244.9	141826	230973	166446	158790	141340	154396	157957	43489.2	43964	41943.1
mws0359	Pentadecanoic Acid	Lipids	608477	391046	627724	579863	612967	551923	571021	678584	982583	548263	526042	549780
pmb0876	LysoPE 16:0	Lipids	1.60393e+06	1.37065e+06	1.31138e+06	1.58117e+06	1.57015e+06	1.37347e+06	1.22721e+06	1.39123e+06	1.25392e+06	425717	404648	414432
mws2623	11-Octadecanoic acid(Vaccenic acid)*	Lipids	2.4254e+07	1.8334e+07	2.73004e+07	5.11225e+07	4.94068e+07	4.94792e+07	6.1675e+07	6.4783e+07	6.06075e+07	2.48475e+07	2.60358e+07	2.50049e+07
MWS80007	13-Hydroperoxy-9Z,11E-octadecadienoic acid	Lipids	143621	118823	161956	491077	496542	516770	658305	670156	659681	120137	114104	116598
Lmbn005287	7S,8S-DiHODE; (9Z,12Z)-(7S,8S)-Dihydroxyoctadeca-9,12-dienoic acid	Lipids	143621	118823	161956	491077	496542	516770	658305	670156	659681	120137	114104	116598
Lmhp007598	LysoPC 19:2(2n isomer)	Lipids	96623.7	65752.7	82169	230338	144392	205751	339611	423652	396087	50865.3	50779.7	53185.6
mws0126	LysoPC 18:0	Lipids	2.70384e+06	2.09127e+06	2.39194e+06	4.10033e+06	3.82318e+06	3.75834e+06	4.21939e+06	3.90305e+06	3.69599e+06	833394	879773	850043
Wmmn002441	(E)-Linalool-1-oic acid	Lipids	428545	436117	359643	544213	397188	498372	404756	527236	463973	355575	339382	356646
mws1491	Linoleic acid	Lipids	3.583e+07	2.9601e+07	4.03922e+07	4.93369e+07	4.43618e+07	4.27487e+07	7.40051e+07	4.62505e+07	7.84904e+07	3.69884e+07	3.77364e+07	3.57193e+07
Lmbn003970	9,12,13-TriHOME; 9(S),12(S),13(S)-Trihydroxy-10(E)-octadecenoic acid	Lipids	230694	195239	230663	543043	595514	473563	533261	501604	485425	109203	111046	115526
Zmyn004714	Ricinoleic acid	Lipids	40101.1	38261.8	40723	64541.6	85135.1	83014.3	76765.5	142386	110172	26915.2	28597.7	27503.5
pmd0132	LysoPC 16:0(2n isomer)	Lipids	1.18666e+07	8.1331e+06	1.02295e+07	1.31252e+07	1.28814e+07	1.36589e+07	1.14751e+07	1.29457e+07	1.04879e+07	2.61826e+06	2.78221e+06	2.66573e+06
Zmyn004449	9-Hydroxy-12-oxo-10(E),15(Z)-octadecadienoic acid	Lipids	33435.8	29437.8	35135.8	56671.9	44231.8	52086.3	42043.3	48427.8	44351.5	14378.1	15087.4	14220.5
pmf0297	1-Eicosanol	Lipids	48838.7	21569.9	27075.1	59115	69647.5	65897.4	71989.9	136505	104311	20807.9	19689.6	19581.1
pmb2319	LysoPC 15:0	Lipids	245740	164738	168972	270634	276974	252710	260246	310879	285211	61530.7	65743.4	64614.7
pmb2406	LysoPC 17:0	Lipids	390375	292175	341688	557939	576550	555084	585638	617626	556458	133147	139425	130431
mws0383	10-Heptadecenoic Acid	Lipids	2.40459e+06	2.50918e+06	2.74072e+06	5.49209e+06	5.2805e+06	6.2768e+06	5.16378e+06	6.23987e+06	7.31539e+06	2.94816e+06	2.98218e+06	3.14646e+06
Zmyn004732	2R-hydroxy-9Z,12Z,15Z-octadecatrienoic acid	Lipids	27709.9	19921	33543.4	45255.9	45242.9	49481.4	46316.9	47024.6	50414	10478.7	10104.8	10844.6
[truncated: 460 more rows]

## Sheet: Table S10
Table S10. List of differential accumulated metabolites
			BN vs PN			BN vs AN
[truncated: 237 more rows]

[truncated: 2 more sheets: Table S11, Table S12]
